# Supplementary material for: Tracing the evolutionary trajectory of CDK4/6 inhibitor resistance in oestrogen receptor positive breast cancer
Source: Research Square preprint supplement (doi:10.21203/rs.3.rs-7488427/v1), 2025-09-04
Supplement: Supplementary file 1 [file b07276c3ba5183fda9b2fca8.xlsx]

## Sheet: Table S1
Table S1: DNA Barcode QC metrics
sampleID	raw_reads	unaligned_reads	reads_after_filtering	unique_barcodes
T47D_parental	79106241	10469157	68637084	255401
T47D_DMSO1	71752865	9440499	62312366	172275
T47D_DMSO2	71712080	6875521	64836559	169768
T47D_Abe_R1	47963831	4097074	43866757	45080
T47D_Abe_R2	53355384	3693750	49661634	45587
T47D_Abe_R3	67471185	5194185	62277000	48038
T47D_Palbo_R1	46780154	5034918	41745236	49005
T47D_Palbo_R2	55952234	6131753	49820481	51710
T47D_Palbo_R3	56133819	6323534	49810285	50027
MCF7_parental	64000971	9042512	54958459	297103
MCF7_DMSO1	39916393	4448794	35467599	177312
MCF7_DMSO2	77124649	7871181	69253468	194088
MCF7_Abe_R1	31223265	2710899	28512366	62080
MCF7_Abe_R2	80140767	6225556	73915211	73838
MCF7_Abe_R3	28959236	2221029	26738207	57916
MCF7_Palbo_R1	54962427	6033868	48928559	72570
MCF7_Palbo_R2	47279416	5773734	41505682	68370
MCF7_Palbo_R3	99623770	9077356	90546414	76569
BT474_parental	70333202	9026341	61306861	237729
BT474_DMSO1	44419719	5307837	39111882	152428
BT474_DMSO2	62941581	7643776	55297805	163464
BT474_Abe_R1	35382174	6587576	28794598	9306
BT474_Abe_R2	26869976	2325788	24544188	5226
BT474_Abe_R3	30406216	2489393	27916823	5081
BT474_Palbo_R1	35467728	3801272	31666456	6349
BT474_Palbo_R2	37289167	4173078	33116089	12549
BT474_Palbo_R3	33750265	4113421	29636844	15907
MCF7_Abe_1st_week	38796517	0	98893	38796517
MCF7_Abe_2nd_week	47801628	5798849	112374	42002779
MCF7_Abe_3rd_week	42887878	5162210	100172	37725668
MCF7_Abe_7th_week	36048051	5193586	83721	30854465
MCF7_Abe_10th_week	32319569	3934118	80597	28385451
MCF7_Abe_12th_week	47927700	6196376	78082	41731324
MCF7_Abe_17th_week	43637981	5375389	84341	38262592
MCF7_Abe_30th_week	35399881	3849501	82098	31550380
MCF7_Abe_36th_week	31472348	3029499	77126	28442849
MCF7_Abe_41st_week	48558632	3615450	91929	44943182
MCF7_Palbo_1st_week	38762614	5919209	82471	32843405
MCF7_Palbo_2nd_week	45504856	5692524	82631	39812332
MCF7_Palbo_3rd_week	45504856	5692524	82631	39812332
MCF7_Palbo_7th_week	41287341	5426044	101110	35861297
MCF7_Palbo_10th_week	41218735	5491375	77972	35727360
T47D_Abe_1st_week	46170902	6824716	54580	39346186
T47D_Abe_2nd_week	44165167	7072240	53127	37092927
T47D_Abe_3rd_week	25074744	3779558	53036	21295186
T47D_Abe_7th_week	37083431	5578013	54560	31505418
T47D_Abe_10th_week	37455210	5055709	53712	32399501
T47D_Abe_12th_week	28393651	3944318	50798	24449333
T47D_Abe_17th_week	32319569	3934118	80597	28385451
T47D_Abe_24th_week	37398162	4040066	52102	33358096
T47D_Palbo_1st_week	29773039	4319487	82687	25453552
T47D_Palbo_2nd_week	34745227	5089834	82413	29655393
T47D_Palbo_3rd_week	37638460	5932053	83374	31706407
T47D_Palbo_7th_week	36808103	5469145	83149	31338958
T47D_Palbo_10th_week	33326697	4965121	82270	28361576

## Sheet: Table S2
Table S2: Whole Exome Sequencing variants
sampleID	mutation	CHROM	POS	REF	ALT	DP	Func.refGene	ExonicFunc.refGene	Gene.refGene	GeneDetail.refGene	AAChange.refGene	cosmic70	X1000g2015aug_all	cytoBand	ExAC_nontcga_ALL	CLINSIG	CLNDBN	CLNACC	CLNDSDB	CLNDSDBID	STATUS	FILTER	QUAL	gnomAD_genome_ALL	SIFT_score	Polyphen2_HDIV_score	Polyphen2_HVAR_score	LRT_score	MutationTaster_score	MutationAssessor_score	FATHMM_score	PROVEAN_score	VEST3_score	CADD_raw	CADD_phred	DANN_score	fathmm.MKL_coding_score	MetaSVM_score	MetaLR_score	integrated_fitCons_score	GERP.._RS	phyloP20way_mammalian	SiPhy_29way_logOdds	Interpro_domain	TUMOR.AD	TUMOR.AF	TUMOR.REF	TUMOR.ALT	TUMOR.AF.1
BT474_Abe_Res1	chr1_51933435_G_C	chr1	51933435	G	C	39	exonic	nonsynonymous_SNV	RAB3B	.	RAB3B:NM_002867:exon4:c.C355G:p.Q119E	.	0.000199681	1p32.3	9.488e-06	.	.	.	.	.	NA	PASS	-10	.	0.158	0.957	0.532	0	1	-1.47	-0.81	-1.59	0.71	1.535	13.5	0.993	0.99	-0.697	0.135	0.732	5.15	1.048	18.404	P-loop_containing_nucleoside_triphosphate_hydrolase\x3bSmall_GTP-binding_protein_domain	15,24	0.586	15	24	0.586
BT474_Abe_Res1	chr1_94203989_C_G	chr1	94203989	C	G	33	exonic	nonsynonymous_SNV	ARHGAP29	.	ARHGAP29:NM_001328665:exon7:c.G511C:p.E171Q,ARHGAP29:NM_001328667:exon7:c.G511C:p.E171Q,ARHGAP29:NM_001328664:exon8:c.G703C:p.E235Q,ARHGAP29:NM_001328666:exon8:c.G703C:p.E235Q,ARHGAP29:NM_004815:exon8:c.G703C:p.E235Q	.	.	1p22.1	.	.	.	.	.	.	NA	PASS	-10	.	0.003	1	0.996	0.003	1	2.865	0.58	-2.93	0.638	5.763	27	0.998	0.962	-0.236	0.353	0.632	5.51	0.807	17.192	.	11,21	0.615	11	21	0.615
BT474_Abe_Res1	chr1_121116909_C_T	chr1	121116909	C	T	16	ncRNA_exonic	.	H2BP1	.	.	.	.	1p11.2	.	.	.	.	.	.	NA	PASS	-10	.	.	.	.	.	.	.	.	.	.	.	.	.	.	.	.	.	.	.	.	.	7,9	0.566	7	9	0.566
BT474_Abe_Res1	chr1_155904499_C_G	chr1	155904499	C	G	51	exonic	nonsynonymous_SNV	RIT1	.	RIT1:NM_001256820:exon4:c.G133C:p.E45Q,RIT1:NM_001256821:exon5:c.G292C:p.E98Q,RIT1:NM_006912:exon5:c.G241C:p.E81Q	.	.	1q22	.	Pathogenic	Noonan_syndrome	RCV000207347.1	MeSH:MedGen:Orphanet:SNOMED_CT	D009634:C0028326:ORPHA648:205824006	NA	PASS	-10	.	0.321	0.825	0.392	0	1	1.935	-1.18	-2.12	0.747	4.706	24.6	0.998	0.982	-0.484	0.336	0.707	5.76	0.892	19.572	P-loop_containing_nucleoside_triphosphate_hydrolase\x3bSmall_GTP-binding_protein_domain	31,19	0.474	31	19	0.474
BT474_Abe_Res1	chr2_195884587_C_T	chr2	195884587	C	T	40	exonic	nonsynonymous_SNV	DNAH7	.	DNAH7:NM_018897:exon35:c.G5761A:p.E1921K	.	.	2q32.3	.	.	.	.	.	.	NA	PASS	-10	.	0.436	0.108	0.144	.	0.999	0.83	1.98	-3.05	0.47	1.756	14.73	0.639	0.871	-1.077	0.035	0.487	4.78	0.046	9.722	.	17,22	0.549	17	22	0.549
BT474_Abe_Res1	chr2_217818670_G_A	chr2	217818670	G	A	47	exonic	nonsynonymous_SNV	TNS1	.	TNS1:NM_001308023:exon21:c.C3287T:p.S1096L,TNS1:NM_001308022:exon22:c.C3311T:p.S1104L,TNS1:NM_022648:exon24:c.C3350T:p.S1117L	.	.	2q35	.	.	.	.	.	.	NA	PASS	-10	.	0.004	0.999	0.994	0.004	0.999	1.445	-2.98	-2.22	0.516	2.342	18.44	0.999	0.986	0.545	0.808	0.563	4.74	1.048	17.928	.	20,27	0.553	20	27	0.553
BT474_Abe_Res1	chr2_226795210_G_A	chr2	226795210	G	A	49	exonic	nonsynonymous_SNV	IRS1	.	IRS1:NM_005544:exon1:c.C3529T:p.L1177F	.	.	2q36.3	.	.	.	.	.	.	NA	PASS	-10	.	0	0.583	0.077	0	0.991	1.79	-1.41	-2.16	0.724	5.714	26.8	0.999	0.916	-0.203	0.39	0.554	5.97	1.048	15.549	.	24,25	0.486	24	25	0.486
BT474_Abe_Res1	chr2_233819959_G_A	chr2	233819959	G	A	28	exonic	nonsynonymous_SNV	MROH2A	.	MROH2A:NM_001287395:exon31:c.G3424A:p.V1142M	.	.	2q37.1	.	.	.	.	.	.	NA	PASS	-10	.	0.048	.	.	0.001	0.888	1.995	-0.99	-2.07	0.486	2.703	20.8	0.998	0.76	-0.342	0.439	0.497	5.43	0.982	14.726	Armadillo-like_helical\x3bArmadillo-type_fold	11,16	0.583	11	16	0.583
BT474_Abe_Res1	chr3_47706423_C_G	chr3	47706423	C	G	27	exonic	nonsynonymous_SNV	SMARCC1	.	SMARCC1:NM_003074:exon10:c.G1026C:p.K342N	.	.	3p21.31	.	.	.	.	.	.	NA	PASS	-10	.	0.013	0.999	0.971	0	1	2.25	0.92	-2.82	0.252	5.629	26.6	0.998	0.902	-0.823	0.211	0.707	1.91	0.069	9.082	.	13,14	0.524	13	14	0.524
BT474_Abe_Res1	chr5_73052356_C_G	chr5	73052356	C	G	19	exonic	stopgain	FCHO2	.	FCHO2:NM_001146032:exon12:c.C923G:p.S308X,FCHO2:NM_138782:exon13:c.C1022G:p.S341X	.	.	5q13.2	.	.	.	.	.	.	NA	PASS	-10	.	.	.	.	0.017	1	.	.	.	.	11.854	38	0.995	0.968	.	.	0.707	5.47	0.931	19.326	.	7,12	0.625	7	12	0.625
BT474_Abe_Res1	chr5_151201664_G_T	chr5	151201664	G	T	20	exonic	stopgain	CCDC69	.	CCDC69:NM_015621:exon3:c.C149A:p.S50X	.	.	5q33.1	.	.	.	.	.	.	NA	PASS	-10	.	.	.	.	0.477	1	.	.	.	.	8.193	35	0.991	0.139	.	.	0.707	2.84	0.884	8.994	.	10,8	0.4	10	8	0.4
BT474_Abe_Res1	chr6_118285273_A_C	chr6	118285273	A	C	41	exonic	nonsynonymous_SNV	SLC35F1	.	SLC35F1:NM_001029858:exon7:c.A937C:p.N313H	.	.	6q22.31	.	.	.	.	.	.	NA	PASS	-10	.	0	1	1	0	1	2.77	.	-4.66	0.496	5.475	26.2	0.997	0.95	-0.105	0.401	0.706	4.6	1.199	14.443	.	18,23	0.567	18	23	0.567
BT474_Abe_Res1	chr7_29194979_C_T	chr7	29194979	C	T	27	exonic	nonsynonymous_SNV	CHN2	.	CHN2:NM_001293070:exon1:c.C38T:p.S13L,CHN2:NM_004067:exon1:c.C38T:p.S13L	.	.	7p14.3	.	.	.	.	.	.	NA	PASS	-10	.	0.097	0.829	0.32	0.292	1	-0.41	2.03	-0.28	0.367	6.488	30	0.994	0.767	-0.374	0.325	0.437	4.19	0.85	15.626	Rho_GTPase-activating_protein_domain	14,13	0.529	14	13	0.529
BT474_Abe_Res1	chr8_27610492_G_A	chr8	27610492	G	A	80	exonic	nonsynonymous_SNV	CLU	.	CLU:NM_001831:exon2:c.C80T:p.S27L	.	.	8p21.1	.	.	.	.	.	.	NA	PASS	-10	.	0.065	0.939	0.703	0.002	1	2.19	1.89	-1.59	0.633	3.011	22.3	0.996	0.426	-1.024	0.107	0.731	4.13	1.048	12.618	Clusterin,_N-terminal	33,46	0.591	33	46	0.591
BT474_Abe_Res1	chr10_23003286_C_T	chr10	23003286	C	T	28	exonic	nonsynonymous_SNV	ARMC3	.	ARMC3:NM_001282747:exon10:c.C814T:p.R272W,ARMC3:NM_001282745:exon13:c.C1603T:p.R535W,ARMC3:NM_001282746:exon13:c.C1603T:p.R535W,ARMC3:NM_173081:exon13:c.C1603T:p.R535W	.	.	10p12.2	5.662e-05	.	.	.	.	.	NA	PASS	-10	.	0.001	1	0.987	0.147	1	2.455	2.17	-5.93	0.843	7.206	34	0.999	0.958	-0.585	0.247	0.554	3.44	0.852	12.195	.	4,24	0.826	4	24	0.826
BT474_Abe_Res1	chr11_119027079_C_G	chr11	119027079	C	G	45	exonic	nonsynonymous_SNV	SLC37A4	.	SLC37A4:NM_001164280:exon5:c.G642C:p.E214D,SLC37A4:NM_001467:exon6:c.G642C:p.E214D,SLC37A4:NM_001164277:exon7:c.G642C:p.E214D,SLC37A4:NM_001164278:exon7:c.G642C:p.E214D,SLC37A4:NM_001164279:exon7:c.G423C:p.E141D	.	.	11q23.3	.	.	.	.	.	.	NA	PASS	-10	.	.	0	0.003	.	.	2.16	.	.	0.107	1.888	15.52	0.745	0.667	.	.	0.257	-0.325	0.852	10.344	Major_facilitator_superfamily_domain	16,27	0.6	16	27	0.6
BT474_Abe_Res1	chr17_9022441_G_A	chr17	9022441	G	A	17	exonic	nonsynonymous_SNV	NTN1	.	NTN1:NM_004822:exon2:c.G68A:p.R23H	.	.	17p13.1	.	.	.	.	.	.	NA	PASS	-10	.	0.555	0.923	0.198	0.004	0.806	1.735	1.39	-0.3	0.371	2.53	19.66	0.997	0.85	-0.837	0.078	0.455	3.65	0.87	15.514	.	4,13	0.667	4	13	0.667
BT474_Abe_Res1	chr19_53352800_C_T	chr19	53352800	C	T	41	exonic	nonsynonymous_SNV	ZNF845	.	ZNF845:NM_138374:exon4:c.C2125T:p.H709Y,ZNF845:NM_001321522:exon5:c.C2125T:p.H709Y,ZNF845:NM_001321523:exon5:c.C2125T:p.H709Y,ZNF845:NM_001321524:exon5:c.C2125T:p.H709Y	.	.	19q13.42	.	.	.	.	.	.	NA	PASS	-10	.	0.053	1	1	.	1	3.985	-2.17	-5.3	0.531	3.638	23.2	0.99	0.439	0.142	0.836	0.707	1.14	0.562	7.788	Zinc_finger_C2H2-type/integrase_DNA-binding_domain\x3bZinc_finger,_C2H2\x3bZinc_finger,_C2H2-like	11,28	0.667	11	28	0.667
BT474_Abe_Res1	chrX_1288817_G_A	chrX	1288817	G	A	46	exonic	startloss	CSF2RA	.	CSF2RA:NM_001161530:exon4:c.G402A:p.M134I,CSF2RA:NM_001161532:exon4:c.G3A:p.M1I,CSF2RA:NM_172247:exon4:c.G402A:p.M134I,CSF2RA:NM_001161531:exon6:c.G402A:p.M134I,CSF2RA:NM_006140:exon6:c.G402A:p.M134I,CSF2RA:NM_172245:exon6:c.G402A:p.M134I,CSF2RA:NM_172246:exon6:c.G402A:p.M134I,CSF2RA:NM_172249:exon6:c.G402A:p.M134I,CSF2RA:NM_001161529:exon7:c.G402A:p.M134I	.	.	Xp22.33	.	.	.	.	.	.	NA	PASS	-10	.	0.037	0.99	0.901	0.033	1	.	0.48	-1.85	0.501	4.307	24	0.991	0.316	0.761	0.859	.	2.02	0.515	7.222	Fibronectin_type_III\x3bImmunoglobulin-like_fold\x3bInterleukin-6_receptor_alpha,_binding\x3bShort_hematopoietin_receptor,_family_2,_conserved_site	23,23	0.5	23	23	0.5
BT474_Abe_Res1	chr1_158700144_G_A	chr1	158700144	G	A	104	exonic	nonsynonymous_SNV	OR6K2	.	OR6K2:NM_001005279:exon1:c.C509T:p.S170L	ID\x3dCOSM1668108\x3bOCCURENCE\x3d1(large_intestine)	.	1q23.1	7.55e-05	.	.	.	.	.	NA	PASS	-10	0.0001	0.057	0.921	0.686	0.001	1	2.37	1.13	-2.92	0.669	2.302	18.18	0.999	0.31	-0.953	0.126	0.487	5.08	0.134	11.488	GPCR,_rhodopsin-like,_7TM	82,19	0.173	82	19	0.173
BT474_Abe_Res1	chr1_201072769_G_A	chr1	201072769	G	A	24	exonic	nonsynonymous_SNV	CACNA1S	.	CACNA1S:NM_000069:exon16:c.C2213T:p.S738L	.	.	1q32.1	.	.	.	.	.	.	NA	PASS	-10	.	0.159	0.745	0.276	0.417	1	1.735	-3.84	-2.36	0.28	3.833	23.4	0.995	0.996	0.147	0.823	0.497	3.95	1.038	16.241	.	16,7	0.318	16	7	0.318
BT474_Abe_Res1	chr1_247424594_A_G	chr1	247424594	A	G	569	exonic	nonsynonymous_SNV	NLRP3	.	NLRP3:NM_001127462:exon3:c.A1151G:p.K384R,NLRP3:NM_001243133:exon3:c.A1145G:p.K382R,NLRP3:NM_004895:exon3:c.A1151G:p.K384R,NLRP3:NM_183395:exon3:c.A1151G:p.K384R,NLRP3:NM_001127461:exon4:c.A1151G:p.K384R,NLRP3:NM_001079821:exon5:c.A1151G:p.K384R	.	.	1q44	.	.	.	.	.	.	NA	PASS	-10	.	0.213	0.778	0.78	0	0.94	0.43	-1.26	-0.58	0.326	3.154	22.6	0.998	0.816	-0.571	0.333	0.487	3.97	1.199	9.533	NACHT_nucleoside_triphosphatase\x3bP-loop_containing_nucleoside_triphosphate_hydrolase	533,16	0.029	533	16	0.029
BT474_Abe_Res1	chr2_178548033_C_G	chr2	178548033	C	G	68	exonic	nonsynonymous_SNV	TTN	.	TTN:NM_003319:exon167:c.G66398C:p.R22133T,TTN:NM_133432:exon168:c.G66773C:p.R22258T,TTN:NM_133437:exon168:c.G66974C:p.R22325T,TTN:NM_133378:exon288:c.G85889C:p.R28630T,TTN:NM_001256850:exon289:c.G88670C:p.R29557T,TTN:NM_001267550:exon339:c.G93593C:p.R31198T	.	.	2q31.2	.	.	.	.	.	.	NA	PASS	-10	.	0.393	0.99	0.921	.	1	1.335	0.73	-4.1	0.461	2.732	21	0.851	0.967	-0.66	0.242	0.563	5.65	0.935	19.727	Fibronectin_type_III\x3bImmunoglobulin-like_fold	55,10	0.18	55	10	0.18
BT474_Abe_Res1	chr3_12576659_G_T	chr3	12576659	G	T	86	exonic	stopgain	MKRN2	.	MKRN2:NM_001271707:exon5:c.G757T:p.E253X,MKRN2:NM_014160:exon6:c.G886T:p.E296X	.	.	3p25.2	.	.	.	.	.	.	NA	PASS	-10	.	.	.	.	0	1	.	.	.	.	14.466	46	0.998	0.963	.	.	0.707	6.06	1.048	13.774	Zinc_finger,_C3HC4_RING-type\x3bZinc_finger,_RING-type\x3bZinc_finger,_RING/FYVE/PHD-type	77,8	0.113	77	8	0.113
BT474_Abe_Res1	chr3_30606885_T_C	chr3	30606885	T	C	53	exonic	startloss	TGFBR2	.	TGFBR2:NM_001024847:exon1:c.T2C:p.M1?,TGFBR2:NM_003242:exon1:c.T2C:p.M1?	.	.	3p24.1	.	.	.	.	.	.	NA	PASS	-10	.	0	0.717	0.599	.	1	.	-2.11	-0.01	0.845	5.095	25.3	0.989	0.365	0.428	0.686	0.733	3.88	0.733	9.229	.	44,9	0.2	44	9	0.2
BT474_Abe_Res1	chr3_123947066_T_G	chr3	123947066	T	G	64	exonic	nonsynonymous_SNV	CCDC14	.	CCDC14:NM_001308317:exon7:c.A482C:p.H161P,CCDC14:NM_022757:exon7:c.A959C:p.H320P	.	.	3q21.1	.	.	.	.	.	.	NA	PASS	-10	.	0.081	0.023	0.015	0.476	1	1.59	0.73	-3.36	0.57	2.53	19.66	0.884	0.388	-1.012	0.085	0.707	-1.13	1.061	1.303	.	57,6	0.084	57	6	0.084
BT474_Abe_Res1	chr4_13600882_AC_A	chr4	13600882	AC	A	53	exonic	frameshift_deletion	BOD1L1	.	BOD1L1:NM_148894:exon10:c.6017delG:p.G2006Vfs*33	.	.	4p15.33	.	.	.	.	.	.	NA	PASS	-10	.	.	.	.	.	.	.	.	.	.	.	.	.	.	.	.	.	.	.	.	.	42,8	0.17	42	8	0.17
BT474_Abe_Res1	chr4_76082193_C_T	chr4	76082193	C	T	127	exonic	stopgain	ART3	.	ART3:NM_001130016:exon3:c.C439T:p.Q147X,ART3:NM_001130017:exon3:c.C439T:p.Q147X,ART3:NM_001179:exon3:c.C439T:p.Q147X	.	.	4q21.1	.	.	.	.	.	.	NA	PASS	-10	.	.	.	.	0	1	.	.	.	.	12.26	39	0.998	0.875	.	.	0.554	6.04	0.935	18.089	.	110,9	0.076	110	9	0.076
BT474_Abe_Res1	chr4_127891120_G_A	chr4	127891120	G	A	46	exonic	nonsynonymous_SNV	PLK4	.	PLK4:NM_001190799:exon7:c.G1763A:p.C588Y,PLK4:NM_001190801:exon8:c.G1736A:p.C579Y,PLK4:NM_014264:exon8:c.G1859A:p.C620Y	.	.	4q28.1	.	.	.	.	.	.	NA	PASS	-10	.	0.001	1	1	0	1	2.57	1.29	-7.6	0.853	6.418	29.7	0.997	0.995	-0.517	0.266	0.707	5.46	0.998	19.296	.	38,8	0.183	38	8	0.183
BT474_Abe_Res1	chr7_122013070_A_G	chr7	122013070	A	G	51	exonic	nonsynonymous_SNV	PTPRZ1	.	PTPRZ1:NM_002851:exon12:c.A4024G:p.S1342G	.	.	7q31.32	.	.	.	.	.	.	NA	PASS	-10	.	0.357	0	0	0.467	1	-1.265	0.79	-0.57	0.076	0.384	6.471	0.692	0.423	-1.018	0.037	0.672	4.55	0.23	5.564	.	44,7	0.163	44	7	0.163
BT474_Abe_Res1	chr8_85655229_G_A	chr8	85655229	G	A	78	ncRNA_exonic	.	REXO1L2P	.	.	.	.	8q21.2	.	.	.	.	.	.	NA	PASS	-10	.	.	.	.	.	.	.	.	.	.	.	.	.	.	.	.	.	.	.	.	.	70,6	0.11	70	6	0.11
BT474_Abe_Res1	chr8_144401044_C_T	chr8	144401044	C	T	68	exonic	nonsynonymous_SNV	CPSF1	.	CPSF1:NM_013291:exon6:c.G419A:p.R140Q	.	0.00239617	8q24.3	0.0007	.	.	.	.	.	NA	PASS	-10	0.0007	.	0.071	0.01	0.004	0.998	0.975	.	.	0.43	1.722	14.53	0.963	0.442	-1.073	0.069	0.672	4.46	0.935	8.276	.	55,12	0.167	55	12	0.167
BT474_Abe_Res1	chr9_21202048_G_C	chr9	21202048	G	C	40	exonic	nonsynonymous_SNV	IFNA7	.	IFNA7:NM_021057:exon1:c.C118G:p.L40V	.	.	9p21.3	.	.	.	.	.	.	NA	PASS	-10	.	0.042	0.276	0.388	0.001	1	2.865	3.18	-2.27	0.169	-0.803	0.042	0.971	0.054	-1.042	0.043	0.447	1.63	-0.054	5.594	Four-helical_cytokine,_core\x3bFour-helical_cytokine-like,_core	34,6	0.176	34	6	0.176
BT474_Abe_Res1	chr9_94300540_C_T	chr9	94300540	C	T	117	exonic	nonsynonymous_SNV	ZNF169	.	ZNF169:NM_001301275:exon5:c.C409T:p.R137C,ZNF169:NM_003448:exon5:c.C985T:p.R329C,ZNF169:NM_194320:exon5:c.C982T:p.R328C	.	.	9q22.32	.	.	.	.	.	.	NA	PASS	-10	.	0.018	1	0.978	.	1	0.9	1.24	-2.75	0.424	3.41	23	0.997	0.042	-1.039	0.111	0.651	0.754	0.054	4.852	Zinc_finger_C2H2-type/integrase_DNA-binding_domain\x3bZinc_finger,_C2H2\x3bZinc_finger,_C2H2-like	106,6	0.061	106	6	0.061
BT474_Abe_Res1	chr9_128276748_G_C	chr9	128276748	G	C	92	exonic	nonsynonymous_SNV	SWI5	.	SWI5:NM_001040011:exon2:c.G419C:p.R140P,SWI5:NM_001318089:exon2:c.G299C:p.R100P,SWI5:NM_001318092:exon2:c.G131C:p.R44P	.	.	9q34.11	.	.	.	.	.	.	NA	PASS	-10	.	0.18	0.158	0.031	0.025	1	0.695	.	-0.13	0.5	4.966	25.1	0.979	0.693	-1.075	0.039	0.442	-0.781	-0.216	0.943	.	82,9	0.108	82	9	0.108
BT474_Abe_Res1	chr9_129096015_G_A	chr9	129096015	G	A	183	exonic	nonsynonymous_SNV	CRAT	.	CRAT:NM_000755:exon13:c.C1648T:p.H550Y,CRAT:NM_001346549:exon13:c.C1528T:p.H510Y,CRAT:NM_001257363:exon14:c.C1585T:p.H529Y,CRAT:NM_001346546:exon14:c.C1651T:p.H551Y,CRAT:NM_004003:exon14:c.C1585T:p.H529Y	.	.	9q34.11	.	.	.	.	.	.	NA	PASS	-10	.	0.052	0.154	0.071	0	0.984	-1.24	-2.4	-1.62	0.239	3.094	22.5	0.987	0.854	-0.599	0.262	0.707	4.04	0.113	11.282	.	175,6	0.039	175	6	0.039
BT474_Abe_Res1	chr10_85856155_C_A	chr10	85856155	C	A	91	exonic	nonsynonymous_SNV	GRID1	.	GRID1:NM_017551:exon7:c.G987T:p.M329I	.	.	10q23.1	.	.	.	.	.	.	NA	PASS	-10	.	0.326	0.925	0.954	0	1	1.79	-1.62	-0.49	0.836	5.668	26.7	0.996	0.985	0.248	0.666	0.516	5.43	0.935	18.232	Extracellular_ligand-binding_receptor\x3bPeriplasmic_binding_protein-like_I	70,20	0.223	70	20	0.223
BT474_Abe_Res1	chr10_101526195_G_C	chr10	101526195	G	C	48	exonic	nonsynonymous_SNV	BTRC	.	BTRC:NM_001256856:exon5:c.G661C:p.G221R,BTRC:NM_003939:exon5:c.G631C:p.G211R,BTRC:NM_033637:exon6:c.G739C:p.G247R	.	.	10q24.32	.	.	.	.	.	.	NA	PASS	-10	.	0.064	0.937	0.51	0	1	2.71	1.83	-5.58	0.499	3.386	23	0.998	0.946	-0.845	0.126	0.706	5.33	1.048	19.03	F-box_domain	36,11	0.243	36	11	0.243
BT474_Abe_Res1	chr11_294744_G_T	chr11	294744	G	T	38	exonic	stopgain	PGGHG	.	PGGHG:NM_025092:exon14:c.G2209T:p.E737X	ID\x3dCOSM3809042,COSM3809043\x3bOCCURENCE\x3d1(breast)	.	11p15.5	.	.	.	.	.	.	NA	PASS	-10	.	.	.	.	.	1	.	.	.	.	8.03	35	0.95	0.02	.	.	0.707	-2.1	-0.193	6.826	.	27,10	0.259	27	10	0.259
BT474_Abe_Res1	chr11_10853139_G_C	chr11	10853139	G	C	57	exonic	nonsynonymous_SNV	ZBED5	.	ZBED5:NM_001143667:exon3:c.C1807G:p.Q603E,ZBED5:NM_021211:exon3:c.C1807G:p.Q603E	.	.	11p15.4	.	.	.	.	.	.	NA	PASS	-10	.	0.423	0.033	0.001	.	0.986	0	3.08	0.12	0.264	-0.526	0.19	0.3	0.889	-1.006	0.011	0.719	4	0.912	11.905	Ribonuclease_H-like_domain	48,6	0.126	48	6	0.126
BT474_Abe_Res1	chr11_47590257_C_T	chr11	47590257	C	T	23	exonic	nonsynonymous_SNV	C1QTNF4	.	C1QTNF4:NM_031909:exon2:c.G554A:p.R185H	.	.	11p11.2	.	.	.	.	.	.	NA	PASS	-10	.	0.041	0.992	0.677	0.336	0.578	0.345	-0.92	-1.19	0.157	5.093	25.3	0.996	0.452	-0.646	0.238	0.701	0.804	-0.047	5.763	Complement_C1q_protein\x3bTumour_necrosis_factor-like_domain	17,6	0.289	17	6	0.289
BT474_Abe_Res1	chr11_57696031_G_A	chr11	57696031	G	A	143	exonic	nonsynonymous_SNV	ZDHHC5	.	ZDHHC5:NM_015457:exon9:c.G997A:p.A333T	.	.	11q12.1	.	.	.	.	.	.	NA	PASS	-10	.	0.482	0	0.001	0.006	0.998	-0.255	1.38	0.26	0.131	2.259	17.9	0.986	0.934	-0.812	0.232	0.672	4.73	1.048	8.702	.	135,7	0.06	135	7	0.06
BT474_Abe_Res1	chr11_74033729_T_TC	chr11	74033729	T	TC	394	exonic	frameshift_insertion	C2CD3	.	C2CD3:NM_001286577:exon31:c.6430_6431insG:p.Q2144Rfs*5	.	.	11q13.4	.	.	.	.	.	.	NA	PASS	-10	.	.	.	.	.	.	.	.	.	.	.	.	.	.	.	.	.	.	.	.	.	371,10	0.03	371	10	0.03
BT474_Abe_Res1	chr11_74033730_G_T	chr11	74033730	G	T	392	exonic	nonsynonymous_SNV	C2CD3	.	C2CD3:NM_001286577:exon31:c.C6430A:p.Q2144K	.	.	11q13.4	.	.	.	.	.	.	NA	PASS	-10	.	0.211	.	.	0.04	1	.	2.95	-0.44	0.038	-0.282	0.73	0.245	0.041	-1.01	0.013	0.707	-2.26	-0.847	3.129	.	371,10	0.03	371	10	0.03
BT474_Abe_Res1	chr13_76957302_C_G	chr13	76957302	C	G	63	exonic	nonsynonymous_SNV	ACOD1	.	ACOD1:NM_001258406:exon4:c.C751G:p.P251A	.	.	13q22.3	.	.	.	.	.	.	NA	PASS	-10	.	0.235	.	.	0	0.968	1.5	.	-1.7	0.692	1.52	13.42	0.978	0.893	-0.784	0.263	0.487	5.78	0.935	20.012	.	47,11	0.224	47	11	0.224
BT474_Abe_Res1	chr15_27327007_G_A	chr15	27327007	G	A	78	exonic	nonsynonymous_SNV	GABRG3	.	GABRG3:NM_001270873:exon4:c.G469A:p.G157R,GABRG3:NM_033223:exon4:c.G469A:p.G157R	.	.	15q12	.	.	.	.	.	.	NA	PASS	-10	.	0.001	1	0.999	0	1	3.61	-4.37	-6.98	0.997	6.668	32	0.999	0.991	1.094	0.965	0.554	5.79	1.048	19.035	Neurotransmitter-gated_ion-channel_ligand-binding_domain	68,9	0.143	68	9	0.143
BT474_Abe_Res1	chr17_17794138_A_G	chr17	17794138	A	G	108	exonic	nonsynonymous_SNV	RAI1	.	RAI1:NM_030665:exon3:c.A1190G:p.N397S	.	.	17p11.2	.	.	.	.	.	.	NA	PASS	-10	.	0.17	0.615	0.219	0	0.666	1.04	1.27	-1.16	0.203	2.523	19.61	0.996	0.988	-1.028	0.062	0.707	5.55	1.199	15.682	.	94,9	0.083	94	9	0.083
BT474_Abe_Res1	chr17_38562163_C_T	chr17	38562163	C	T	164	exonic	nonsynonymous_SNV	SRCIN1	.	SRCIN1:NM_025248:exon7:c.G1000A:p.G334R	.	.	17q12	.	.	.	.	.	.	NA	PASS	-10	.	.	1	0.997	0	1	1.445	.	.	0.738	5.918	27.5	0.999	0.882	-0.476	0.285	0.598	4.77	0.806	16.561	.	151,7	0.045	151	7	0.045
BT474_Abe_Res1	chr19_4175068_C_T	chr19	4175068	C	T	23	exonic	nonsynonymous_SNV	SIRT6	.	SIRT6:NM_001321061:exon5:c.G401A:p.G134E,SIRT6:NM_001321062:exon5:c.G293A:p.G98E,SIRT6:NM_001193285:exon6:c.G617A:p.G206E,SIRT6:NM_001321058:exon6:c.G482A:p.G161E,SIRT6:NM_001321059:exon6:c.G515A:p.G172E,SIRT6:NM_001321063:exon6:c.G475A:p.E159K,SIRT6:NM_001321060:exon7:c.G658A:p.E220K,SIRT6:NM_001321064:exon7:c.G442A:p.E148K,SIRT6:NM_016539:exon7:c.G698A:p.G233E	.	.	19p13.3	.	.	.	.	.	.	NA	PASS	-10	.	0.003	0.996	0.884	0	1	3.555	1.95	-6.44	0.676	5.745	26.9	0.997	0.943	-0.478	0.186	0.707	4.49	0.859	15.723	DHS-like_NAD/FAD-binding_domain\x3bSirtuin_family,_catalytic_core_domain	15,7	0.368	15	7	0.368
BT474_Abe_Res1	chr19_30548471_G_A	chr19	30548471	G	A	243	exonic	nonsynonymous_SNV	ZNF536	.	ZNF536:NM_014717:exon4:c.G2852A:p.G951E	.	.	19q12	.	.	.	.	.	.	NA	PASS	-10	.	0.026	0.181	0.102	0.138	1	0.695	2.99	-1.45	0.302	0.897	10.06	0.875	0.876	-1.002	0.022	0.487	4.38	0.043	15.565	.	227,7	0.034	227	7	0.034
BT474_Abe_Res1	chr19_40591052_C_T	chr19	40591052	C	T	55	exonic	nonsynonymous_SNV	SHKBP1	.	SHKBP1:NM_138392:exon18:c.C1969T:p.R657C	.	.	19q13.2	1.944e-05	.	.	.	.	.	NA	PASS	-10	.	.	0.909	0.339	0.168	0.992	1.39	0.86	-1.28	0.509	5.586	26.5	0.997	0.71	-1.014	0.094	0.707	1.12	0.007	7.081	.	45,8	0.114	45	8	0.114
BT474_Abe_Res1	chr20_34481184_G_T	chr20	34481184	G	T	220	exonic	stopgain	ITCH	.	ITCH:NM_001257138:exon19:c.G1741T:p.E581X,ITCH:NM_001324198:exon20:c.G2071T:p.E691X,ITCH:NM_031483:exon20:c.G2071T:p.E691X,ITCH:NM_001257137:exon21:c.G2194T:p.E732X,ITCH:NM_001324197:exon21:c.G2194T:p.E732X	.	.	20q11.22	.	.	.	.	.	.	NA	PASS	-10	.	.	.	.	0	1	.	.	.	.	13.422	42	0.996	0.99	.	.	0.732	4.52	1.048	14.003	HECT	208,6	0.031	208	6	0.031
BT474_Abe_Res1	chr20_35254547_G_A	chr20	35254547	G	A	684	exonic	nonsynonymous_SNV	MMP24	.	MMP24:NM_006690:exon4:c.G610A:p.E204K	.	0.000199681	20q11.22	4.735e-05	.	.	.	.	.	NA	PASS	-10	.	0.213	0.153	0.073	0	1	0.16	1.99	-1.22	0.613	3.682	23.3	0.999	0.981	-1.064	0.035	0.706	5.38	1.048	18.31	Metallopeptidase,_catalytic_domain\x3bPeptidase_M10,_metallopeptidase\x3bPeptidase,_metallopeptidase	655,13	0.022	655	13	0.022
BT474_Abe_Res1	chr20_57266007_G_C	chr20	57266007	G	C	377	exonic	nonsynonymous_SNV	BMP7	.	BMP7:NM_001719:exon1:c.C116G:p.S39W	.	.	20q13.31	.	.	.	.	.	.	NA	PASS	-10	.	0.001	1	1	0	1	2.74	-0.29	-3.34	0.843	6.841	33	0.992	0.99	0.221	0.541	0.652	5.04	0.998	18.385	Transforming_growth_factor-beta,_N-terminal	359,10	0.024	359	10	0.024
BT474_Abe_Res1	chr22_21634719_C_T	chr22	21634719	C	T	104	exonic	nonsynonymous_SNV	CCDC116	.	CCDC116:NM_001331066:exon4:c.C656T:p.S219F,CCDC116:NM_152612:exon4:c.C656T:p.S219F	.	.	22q11.21	.	.	.	.	.	.	NA	PASS	-10	.	0	0.998	0.962	0.173	1	1.445	2.61	-4.79	0.602	0.754	9.176	0.981	0.179	-1.116	0.063	0.554	3.38	0.892	8.155	.	89,12	0.146	89	12	0.146
BT474_Abe_Res1	chr22_30935133_C_T	chr22	30935133	C	T	132	exonic	nonsynonymous_SNV	MORC2	.	MORC2:NM_001303256:exon19:c.G1841A:p.R614Q,MORC2:NM_001303257:exon19:c.G1841A:p.R614Q,MORC2:NM_014941:exon20:c.G1655A:p.R552Q	.	.	22q12.2	.	.	.	.	.	.	NA	PASS	-10	.	0.265	1	0.992	0	1	1.295	2.61	-0.34	0.643	4.59	24.4	0.999	0.995	-1.139	0.07	0.707	5.76	0.935	18.14	.	116,7	0.06	116	7	0.06
BT474_Abe_Res2	chr1_51933435_G_C	chr1	51933435	G	C	48	exonic	nonsynonymous_SNV	RAB3B	.	RAB3B:NM_002867:exon4:c.C355G:p.Q119E	.	0.000199681	1p32.3	9.488e-06	.	.	.	.	.	NA	PASS	-10	.	0.158	0.957	0.532	0	1	-1.47	-0.81	-1.59	0.71	1.535	13.5	0.993	0.99	-0.697	0.135	0.732	5.15	1.048	18.404	P-loop_containing_nucleoside_triphosphate_hydrolase\x3bSmall_GTP-binding_protein_domain	21,26	0.588	21	26	0.588
BT474_Abe_Res2	chr1_171524860_C_G	chr1	171524860	C	G	42	exonic	nonsynonymous_SNV	PRRC2C	.	PRRC2C:NM_015172:exon10:c.C1089G:p.N363K	.	.	1q24.3	.	.	.	.	.	.	NA	PASS	-10	.	0.161	0.557	0.178	0.039	0.994	1.1	2.66	-1.1	0.109	1.299	12.26	0.67	0.845	-1.013	0.011	0.707	3.11	0.935	8.359	.	27,15	0.428	27	15	0.428
BT474_Abe_Res2	chr3_124657461_G_C	chr3	124657461	G	C	63	exonic	nonsynonymous_SNV	KALRN	.	KALRN:NM_001322998:exon6:c.G686C:p.R229T,KALRN:NM_001322999:exon6:c.G683C:p.R228T,KALRN:NM_001323000:exon6:c.G686C:p.R229T,KALRN:NM_001323001:exon6:c.G683C:p.R228T,KALRN:NM_001322993:exon7:c.G782C:p.R261T,KALRN:NM_001322994:exon7:c.G779C:p.R260T,KALRN:NM_001322995:exon7:c.G782C:p.R261T,KALRN:NM_001322996:exon7:c.G782C:p.R261T,KALRN:NM_001322997:exon7:c.G779C:p.R260T,KALRN:NM_007064:exon7:c.G782C:…	.	.	3q21.2	.	.	.	.	.	.	NA	PASS	-10	.	0.55	0.997	0.945	0	0.956	-0.105	-0.03	-2.04	0.309	2.643	20.5	0.908	0.927	-0.684	0.203	0.638	5.08	0.953	14.301	Dbl_homology_(DH)_domain	36,27	0.458	36	27	0.458
BT474_Abe_Res2	chr4_38829308_C_G	chr4	38829308	C	G	30	exonic	nonsynonymous_SNV	TLR6	.	TLR6:NM_006068:exon2:c.G166C:p.V56L	.	.	4p14	.	.	.	.	.	.	NA	PASS	-10	.	0.209	0.008	0.004	0.596	1	1.14	4.27	-1.15	0.218	0.652	8.512	0.936	0.095	-0.912	0.009	0.776	0.713	0.065	4.264	.	14,16	0.538	14	16	0.538
BT474_Abe_Res2	chr4_87337331_C_T	chr4	87337331	C	T	19	exonic	nonsynonymous_SNV	HSD17B11	.	HSD17B11:NM_016245:exon7:c.G848A:p.R283Q	.	.	4q22.1	.	.	.	.	.	.	NA	PASS	-10	.	.	.	.	.	.	.	.	.	.	.	.	.	.	.	.	.	.	.	.	.	3,16	0.786	3	16	0.786
BT474_Abe_Res2	chr7_139261308_C_G	chr7	139261308	C	G	44	exonic	nonsynonymous_SNV	UBN2	.	UBN2:NM_173569:exon6:c.C962G:p.S321C	.	.	7q34	.	.	.	.	.	.	NA	PASS	-10	.	0.004	0.998	0.87	0	1	1.845	1.83	-2.13	0.251	5.541	26.3	0.992	0.994	-1.07	0.141	0.563	5.98	0.892	20.456	.	12,31	0.722	12	31	0.722
BT474_Abe_Res2	chr7_149266846_G_A	chr7	149266846	G	A	68	exonic	nonsynonymous_SNV	ZNF783	.	ZNF783:NM_001195220:exon3:c.G448A:p.V150M	.	.	7q36.1	0.0006	.	.	.	.	.	NA	PASS	-10	0.0004	0.003	.	.	0.01	0.998	2.575	3.64	-2.52	0.503	5.465	26.2	0.999	0.847	-1.187	0.04	0.732	3.88	0.953	11.193	Krueppel-associated_box	0,63	0.982	0	63	0.982
BT474_Abe_Res2	chr9_110136857_G_T	chr9	110136857	G	T	47	exonic	nonsynonymous_SNV	AKAP2;PALM2-AKAP2	.	AKAP2:NM_001004065:exon2:c.G887T:p.R296I,AKAP2:NM_001136562:exon2:c.G620T:p.R207I,AKAP2:NM_001198656:exon2:c.G887T:p.R296I,PALM2-AKAP2:NM_007203:exon8:c.G1313T:p.R438I,PALM2-AKAP2:NM_147150:exon8:c.G1313T:p.R438I	.	.	9q31.3	.	.	.	.	.	.	NA	PASS	-10	.	0.004	0.999	0.965	0	0.985	2.045	0.76	-1.78	0.742	3.422	23	0.975	0.771	-0.738	0.271	0.706	5.27	1.048	15.107	.	30,17	0.35	30	17	0.35
BT474_Abe_Res2	chr10_23003286_C_T	chr10	23003286	C	T	19	exonic	nonsynonymous_SNV	ARMC3	.	ARMC3:NM_001282747:exon10:c.C814T:p.R272W,ARMC3:NM_001282745:exon13:c.C1603T:p.R535W,ARMC3:NM_001282746:exon13:c.C1603T:p.R535W,ARMC3:NM_173081:exon13:c.C1603T:p.R535W	.	.	10p12.2	5.662e-05	.	.	.	.	.	NA	PASS	-10	.	0.001	1	0.987	0.147	1	2.455	2.17	-5.93	0.843	7.206	34	0.999	0.958	-0.585	0.247	0.554	3.44	0.852	12.195	.	0,19	0.941	0	19	0.941
BT474_Abe_Res2	chr11_119027079_C_G	chr11	119027079	C	G	58	exonic	nonsynonymous_SNV	SLC37A4	.	SLC37A4:NM_001164280:exon5:c.G642C:p.E214D,SLC37A4:NM_001467:exon6:c.G642C:p.E214D,SLC37A4:NM_001164277:exon7:c.G642C:p.E214D,SLC37A4:NM_001164278:exon7:c.G642C:p.E214D,SLC37A4:NM_001164279:exon7:c.G423C:p.E141D	.	.	11q23.3	.	.	.	.	.	.	NA	PASS	-10	.	.	0	0.003	.	.	2.16	.	.	0.107	1.888	15.52	0.745	0.667	.	.	0.257	-0.325	0.852	10.344	Major_facilitator_superfamily_domain	16,38	0.66	16	38	0.66
BT474_Abe_Res2	chr12_100088996_C_G	chr12	100088996	C	G	40	exonic	nonsynonymous_SNV	UHRF1BP1L	.	UHRF1BP1L:NM_001006947:exon8:c.G940C:p.D314H,UHRF1BP1L:NM_015054:exon8:c.G940C:p.D314H	.	.	12q23.1	.	.	.	.	.	.	NA	PASS	-10	.	0.001	1	0.999	0	1	2.015	2.28	-6.1	0.973	5.779	27.1	0.995	0.981	-0.584	0.264	0.732	5.24	0.892	18.834	.	17,22	0.514	17	22	0.514
BT474_Abe_Res2	chr13_49506643_C_T	chr13	49506643	C	T	41	exonic	stopgain	PHF11;SETDB2-PHF11	.	PHF11:NM_001040443:exon2:c.C103T:p.Q35X,SETDB2-PHF11:NM_001320727:exon12:c.C1585T:p.Q529X	.	.	13q14.2	.	.	.	.	.	.	NA	PASS	-10	.	.	.	.	0.646	1	.	.	.	.	9.621	36	0.997	0.867	.	.	0.732	2.99	0.044	10.05	.	13,25	0.688	13	25	0.688
BT474_Abe_Res2	chr15_40196716_C_A	chr15	40196716	C	A	36	exonic	nonsynonymous_SNV	BUB1B	.	BUB1B:NM_001211:exon9:c.C1230A:p.F410L	.	.	15q15.1	.	.	.	.	.	.	NA	PASS	-10	.	0.109	1	0.999	0	0.992	1.62	2.43	-3.41	0.77	5.328	25.8	0.999	0.925	-1.034	0.07	0.707	3.7	0.07	11.68	.	23,13	0.324	23	13	0.324
BT474_Abe_Res2	chr17_9022441_G_A	chr17	9022441	G	A	24	exonic	nonsynonymous_SNV	NTN1	.	NTN1:NM_004822:exon2:c.G68A:p.R23H	.	.	17p13.1	.	.	.	.	.	.	NA	PASS	-10	.	0.555	0.923	0.198	0.004	0.806	1.735	1.39	-0.3	0.371	2.53	19.66	0.997	0.85	-0.837	0.078	0.455	3.65	0.87	15.514	.	9,15	0.619	9	15	0.619
BT474_Abe_Res2	chr22_50170880_C_A	chr22	50170880	C	A	19	exonic	nonsynonymous_SNV	PANX2	.	PANX2:NM_001160300:exon1:c.C150A:p.F50L,PANX2:NM_052839:exon1:c.C150A:p.F50L	.	.	22q13.33	.	.	.	.	.	.	NA	PASS	-10	.	0.299	0.951	0.656	0	1	0.345	1.91	-0.21	0.576	5.088	25.3	0.977	0.569	-1.056	0.039	0.726	0.947	0.699	4.218	.	4,15	0.786	4	15	0.786
BT474_Abe_Res2	chr5_141209363_C_G	chr5	141209363	C	G	63	exonic	nonsynonymous_SNV	PCDHB12	.	PCDHB12:NM_018932:exon1:c.C456G:p.F152L	.	.	5q31.3	.	.	.	.	.	.	NA	PASS	-10	.	0.063	0.151	0.168	.	1	2.16	0.85	-5.13	0.453	2.355	18.52	0.978	0.304	-0.866	0.143	0.487	2.22	0.034	6.228	Cadherin\x3bCadherin-like	38,23	0.398	38	23	0.398
BT474_Abe_Res2	chr1_3477981_A_C	chr1	3477981	A	C	101	exonic	nonsynonymous_SNV	ARHGEF16	.	ARHGEF16:NM_014448:exon11:c.A1580C:p.Y527S	.	.	1p36.32	.	.	.	.	.	.	NA	PASS	-10	.	0.003	0.998	0.98	0	1	3.045	-1.35	-7.35	0.724	5.439	26.1	0.988	0.951	0.612	0.723	0.696	5.58	1.199	15.716	Pleckstrin_homology_domain\x3bPleckstrin_homology-like_domain	73,25	0.271	73	25	0.271
BT474_Abe_Res2	chr1_120890143_A_G	chr1	120890143	A	G	45	exonic	nonsynonymous_SNV	PPIAL4A	.	PPIAL4A:NM_001143883:exon1:c.A323G:p.N108S	.	.	1p11.2	.	.	.	.	.	.	NA	PASS	-10	.	.	.	.	.	.	.	.	.	0.048	-0.507	0.211	0.103	0.643	.	.	0.165	-0.772	0.437	4.426	Cyclophilin-like_domain\x3bCyclophilin-type_peptidyl-prolyl_cis-trans_isomerase_domain	37,6	0.117	37	6	0.117
BT474_Abe_Res2	chr1_173833490_A_G	chr1	173833490	A	G	170	exonic	nonsynonymous_SNV	DARS2	.	DARS2:NM_018122:exon6:c.A607G:p.N203D	.	.	1q25.1	.	.	.	.	.	.	NA	PASS	-10	.	0.135	0.768	0.56	0	1	-0.695	-1.77	-2.67	0.166	2.921	21.9	0.996	0.977	-0.686	0.141	0.732	4.82	1.199	10.88	Aminoacyl-tRNA_synthetase,_class_II\x3bAminoacyl-tRNA_synthetase,_class_II_(D/K/N)	144,23	0.15	144	23	0.15
BT474_Abe_Res2	chr1_247156779_C_G	chr1	247156779	C	G	210	exonic	nonsynonymous_SNV	ZNF124	.	ZNF124:NM_001297568:exon4:c.G843C:p.E281D,ZNF124:NM_003431:exon4:c.G657C:p.E219D	.	.	1q44	.	.	.	.	.	.	NA	PASS	-10	.	0.02	0.965	0.82	.	1	1.92	3.18	-2.54	0.088	3.537	23.1	0.982	0	-1.055	0.065	0.672	-0.229	-0.508	3.827	Zinc_finger_C2H2-type/integrase_DNA-binding_domain\x3bZinc_finger,_C2H2\x3bZinc_finger,_C2H2-like	195,13	0.06	195	13	0.06
BT474_Abe_Res2	chr2_167249601_G_C	chr2	167249601	G	C	19	exonic	nonsynonymous_SNV	XIRP2	.	XIRP2:NM_001199144:exon7:c.G7543C:p.E2515Q,XIRP2:NM_152381:exon9:c.G8209C:p.E2737Q	.	.	2q24.3	.	.	.	.	.	.	NA	PASS	-10	.	0.16	0.186	0.077	0.566	1	1.79	4.15	-0.81	0.058	0.412	6.719	0.949	0.396	-0.879	0.018	0.487	4.15	1.048	15.613	.	12,7	0.4	12	7	0.4
BT474_Abe_Res2	chr2_218828581_GC_G	chr2	218828581	GC	G	31	exonic	frameshift_deletion	PRKAG3	.	PRKAG3:NM_017431:exon5:c.652delG:p.A218Lfs*24	.	.	2q35	.	.	.	.	.	.	NA	PASS	-10	.	.	.	.	.	.	.	.	.	.	.	.	.	.	.	.	.	.	.	.	.	21,10	0.348	21	10	0.348
BT474_Abe_Res2	chr3_30606885_T_C	chr3	30606885	T	C	38	exonic	startloss	TGFBR2	.	TGFBR2:NM_001024847:exon1:c.T2C:p.M1?,TGFBR2:NM_003242:exon1:c.T2C:p.M1?	.	.	3p24.1	.	.	.	.	.	.	NA	PASS	-10	.	0	0.717	0.599	.	1	.	-2.11	-0.01	0.845	5.095	25.3	0.989	0.365	0.428	0.686	0.733	3.88	0.733	9.229	.	30,7	0.185	30	7	0.185
BT474_Abe_Res2	chr3_52491938_A_T	chr3	52491938	A	T	132	exonic	nonsynonymous_SNV	NISCH	.	NISCH:NM_007184:exon21:c.A3971T:p.E1324V	.	.	3p21.1	.	.	.	.	.	.	NA	PASS	-10	.	0.001	0.999	0.996	0	1	0.975	2.94	-3.18	0.607	5.378	25.9	0.995	0.958	-1.146	0.059	0.722	5.6	1.14	15.784	.	92,35	0.274	92	35	0.274
BT474_Abe_Res2	chr3_128620452_C_A	chr3	128620452	C	A	70	exonic	stopgain	RPN1	.	RPN1:NM_002950:exon10:c.G1783T:p.E595X	.	.	3q21.3	.	.	.	.	.	.	NA	PASS	-10	.	.	.	.	0	1	.	.	.	.	14.976	48	0.997	0.968	.	.	0.646	5.52	0.892	19.428	.	61,9	0.14	61	9	0.14
BT474_Abe_Res2	chr3_167467113_A_T	chr3	167467113	A	T	34	exonic	nonsynonymous_SNV	SERPINI2	.	SERPINI2:NM_006217:exon3:c.T420A:p.F140L,SERPINI2:NM_001012303:exon4:c.T450A:p.F150L	.	.	3q26.1	.	.	.	.	.	.	NA	PASS	-10	.	0	0.999	0.996	0	0.996	3.06	-2.69	-5.26	0.913	5.436	26.1	0.999	0.829	0.689	0.834	0.554	3.02	1.199	5.918	Serpin_domain	28,6	0.209	28	6	0.209
BT474_Abe_Res2	chr3_169793681_G_T	chr3	169793681	G	T	38	exonic	stopgain	LRRC34	.	LRRC34:NM_153353:exon10:c.C1253A:p.S418X,LRRC34:NM_001172779:exon11:c.C1349A:p.S450X	.	.	3q26.2	.	.	.	.	.	.	NA	PASS	-10	.	.	.	.	0.467	1	.	.	.	.	9.576	35	0.978	0.096	.	.	0.651	3.02	0.953	4.572	.	31,7	0.2	31	7	0.2
BT474_Abe_Res2	chr4_55359450_A_G	chr4	55359450	A	G	46	exonic	nonsynonymous_SNV	SRD5A3	.	SRD5A3:NM_024592:exon2:c.A326G:p.H109R	.	.	4q12	.	.	.	.	.	.	NA	PASS	-10	.	0.439	0	0.001	0.492	1	1.1	2.17	-0.38	0.414	0.149	4.132	0.896	0.223	-1.017	0.059	0.706	1.25	0.237	5.709	.	31,14	0.333	31	14	0.333
BT474_Abe_Res2	chr5_40854330_C_T	chr5	40854330	C	T	148	exonic	nonsynonymous_SNV	CARD6	.	CARD6:NM_032587:exon3:c.C2998T:p.P1000S	.	.	5p13.1	2.825e-05	.	.	.	.	.	NA	PASS	-10	.	1	0.001	0	0.298	1	0	-3.78	0.96	0.074	-1.388	0.003	0.114	0.001	-0.444	0.545	0.707	1.83	0.024	5.33	.	126,15	0.128	126	15	0.128
BT474_Abe_Res2	chr5_139462624_A_G	chr5	139462624	A	G	214	exonic	nonsynonymous_SNV	ECSCR	.	ECSCR:NM_001077693:exon1:c.T47C:p.F16S,ECSCR:NM_001293739:exon1:c.T47C:p.F16S	.	.	5q31.2	.	.	.	.	.	.	NA	PASS	-10	.	.	0.899	0.571	.	.	.	.	.	0.658	4.842	24.8	0.996	0.549	-0.915	0.084	0.206	3.16	1.199	6.755	.	200,9	0.044	200	9	0.044
BT474_Abe_Res2	chr5_146149642_G_A	chr5	146149642	G	A	44	exonic	stopgain	LARS1	.	LARS:NM_001317964:exon14:c.C1345T:p.Q449X,LARS:NM_001317965:exon14:c.C1321T:p.Q441X,LARS:NM_016460:exon14:c.C1402T:p.Q468X,LARS:NM_020117:exon15:c.C1483T:p.Q495X	.	.	5q32	.	.	.	.	.	.	NA	PASS	-10	.	.	.	.	0	1	.	.	.	.	11.828	38	0.998	0.994	.	.	0.707	4.32	1.048	15.15	Aminoacyl-tRNA_synthetase,_class_Ia\x3bValyl/Leucyl/Isoleucyl-tRNA_synthetase,_editing_domain	34,9	0.228	34	9	0.228
BT474_Abe_Res2	chr5_179114025_C_A	chr5	179114025	C	A	152	exonic	nonsynonymous_SNV	ADAMTS2	.	ADAMTS2:NM_014244:exon22:c.G3478T:p.A1160S	.	.	5q35.3	.	.	.	.	.	.	NA	PASS	-10	.	0.081	0.919	0.395	0	1	0.55	0.18	-0.44	0.286	1.608	13.9	0.985	0.916	-0.987	0.117	0.615	4.18	0.852	9.169	.	133,16	0.115	133	16	0.115
BT474_Abe_Res2	chr6_110967593_G_C	chr6	110967593	G	C	26	exonic	nonsynonymous_SNV	GTF3C6	.	GTF3C6:NM_138408:exon6:c.G445C:p.D149H	.	.	6q21	.	.	.	.	.	.	NA	PASS	-10	.	0.002	0.998	0.879	0.01	1	2.24	.	-2.93	0.344	5.245	25.6	0.995	0.958	-0.301	0.343	0.732	4.96	0.994	17.144	.	18,7	0.333	18	7	0.333
BT474_Abe_Res2	chr6_159775208_G_T	chr6	159775208	G	T	51	exonic	nonsynonymous_SNV	ACAT2	.	ACAT2:NM_001303253:exon5:c.G616T:p.D206Y,ACAT2:NM_005891:exon5:c.G529T:p.D177Y	.	.	6q25.3	.	.	.	.	.	.	NA	PASS	-10	.	0.002	0.977	0.672	0.01	0.989	2.45	-2.71	-2.44	0.404	6.66	32	0.995	0.984	0.668	0.768	0.707	5.66	1.048	19.747	Thiolase,_N-terminal\x3bThiolase-like\x3bThiolase-like,_subgroup	39,11	0.201	39	11	0.201
BT474_Abe_Res2	chr7_1498531_C_T	chr7	1498531	C	T	51	exonic	nonsynonymous_SNV	INTS1	.	INTS1:NM_001080453:exon10:c.G1306A:p.D436N	.	.	7p22.3	.	.	.	.	.	.	NA	PASS	-10	.	0.004	0.879	0.712	0	1	1.59	2.68	-2.94	0.09	4.774	24.7	0.999	0.955	-0.854	0.174	0.672	4.84	0.802	17.915	.	33,18	0.3	33	18	0.3
BT474_Abe_Res2	chr9_126615452_G_A	chr9	126615452	G	A	135	exonic	nonsynonymous_SNV	LMX1B	.	LMX1B:NM_001174146:exon2:c.G209A:p.R70Q,LMX1B:NM_001174147:exon2:c.G209A:p.R70Q,LMX1B:NM_002316:exon2:c.G209A:p.R70Q	.	.	9q33.3	.	.	.	.	.	.	NA	PASS	-10	.	0.099	1	0.999	0	1	1.945	-2.26	-2.17	0.784	6.313	29.2	0.999	0.859	0.617	0.752	0.598	4.71	1.047	16.221	Zinc_finger,_LIM-type	121,14	0.104	121	14	0.104
BT474_Abe_Res2	chr9_128276748_G_C	chr9	128276748	G	C	74	exonic	nonsynonymous_SNV	SWI5	.	SWI5:NM_001040011:exon2:c.G419C:p.R140P,SWI5:NM_001318089:exon2:c.G299C:p.R100P,SWI5:NM_001318092:exon2:c.G131C:p.R44P	.	.	9q34.11	.	.	.	.	.	.	NA	PASS	-10	.	0.18	0.158	0.031	0.025	1	0.695	.	-0.13	0.5	4.966	25.1	0.979	0.693	-1.075	0.039	0.442	-0.781	-0.216	0.943	.	52,14	0.204	52	14	0.204
BT474_Abe_Res2	chr9_132814700_G_A	chr9	132814700	G	A	85	exonic	nonsynonymous_SNV	AK8	.	AK8:NM_001317958:exon10:c.C305T:p.A102V,AK8:NM_152572:exon10:c.C917T:p.A306V,AK8:NM_001317959:exon12:c.C401T:p.A134V	.	.	9q34.13	.	.	.	.	.	.	NA	PASS	-10	.	0.219	0.368	0.199	0.006	0.929	2.455	-1.13	-1.93	0.186	3.645	23.2	0.995	0.822	-0.281	0.444	0.554	4.35	0.953	15.827	P-loop_containing_nucleoside_triphosphate_hydrolase	65,19	0.213	65	19	0.213
BT474_Abe_Res2	chr11_17531276_G_A	chr11	17531276	G	A	103	exonic	nonsynonymous_SNV	USH1C	.	USH1C:NM_001297764:exon4:c.C265T:p.R89C,USH1C:NM_005709:exon4:c.C265T:p.R89C,USH1C:NM_153676:exon4:c.C265T:p.R89C	.	.	11p15.1	1.891e-05	.	.	.	.	.	NA	PASS	-10	.	0.003	1	0.99	0	1	1.57	1.59	-3.4	0.766	7.434	34	0.999	0.955	-0.913	0.148	0.549	4.76	1.048	12.133	PDZ_domain	89,11	0.136	89	11	0.136
BT474_Abe_Res2	chr11_17642229_G_C	chr11	17642229	G	C	74	exonic	nonsynonymous_SNV	OTOG	.	OTOG:NM_001277269:exon52:c.G8434C:p.E2812Q,OTOG:NM_001292063:exon53:c.G8398C:p.E2800Q	.	.	11p15.1	.	.	.	.	.	.	NA	PASS	-10	.	0.007	.	.	0	1	1.15	2.21	-2.29	0.373	4.329	24	0.997	0.991	-1.147	0.064	0.554	4.98	0.998	18.246	Cystine_knot,_C-terminal	61,10	0.167	61	10	0.167
BT474_Abe_Res2	chr11_73309636_C_T	chr11	73309636	C	T	467	exonic	nonsynonymous_SNV	ARHGEF17	.	ARHGEF17:NM_014786:exon1:c.C998T:p.P333L	.	.	11q13.4	.	.	.	.	.	.	NA	PASS	-10	.	0.001	0.9	0.433	0.001	0.996	0.695	0.46	-1.09	0.485	4.768	24.7	0.998	0.298	-0.951	0.11	0.658	4.02	0.851	9.808	.	427,30	0.066	427	30	0.066
BT474_Abe_Res2	chr11_101944403_G_C	chr11	101944403	G	C	96	exonic	nonsynonymous_SNV	CEP126	.	CEP126:NM_020802:exon3:c.G387C:p.R129S	.	.	11q22.1	.	.	.	.	.	.	NA	PASS	-10	.	0.004	0.992	0.755	0.002	0.97	2.19	2.68	-3.74	0.48	5.613	26.5	0.997	0.891	-1.088	0.074	0.615	4.92	0.953	14.174	.	88,6	0.082	88	6	0.082
BT474_Abe_Res2	chr12_11393815_T_C	chr12	11393815	T	C	76	exonic	nonsynonymous_SNV	PRB2	.	PRB2:NM_006248:exon3:c.A263G:p.K88R	.	0.000399361	12p13.2	6.263e-05	.	.	.	.	.	NA	PASS	-10	0.0001	.	0.833	0.136	.	1	0.345	3.87	-1.06	0.115	-0.853	0.033	0.435	0.005	-0.923	0.005	0.554	1.06	0.338	6.283	.	60,15	0.187	60	15	0.187
BT474_Abe_Res2	chr12_56617451_G_A	chr12	56617451	G	A	75	exonic	nonsynonymous_SNV	BAZ2A	.	BAZ2A:NM_001300905:exon2:c.C80T:p.S27L,BAZ2A:NM_013449:exon2:c.C86T:p.S29L,BAZ2A:NM_001351156:exon3:c.C80T:p.S27L	.	.	12q13.3	.	.	.	.	.	.	NA	PASS	-10	.	0	0.948	0.833	0.001	0.962	0.895	2.21	-1.93	0.287	6.463	29.9	0.999	0.988	-1.068	0.065	0.707	4.42	0.953	16.18	.	60,13	0.181	60	13	0.181
BT474_Abe_Res2	chr12_80610464_C_G	chr12	80610464	C	G	38	exonic	nonsynonymous_SNV	PTPRQ	.	PTPRQ:NM_001145026:exon28:c.C4757G:p.S1586C	.	.	12q21.31	.	.	.	.	.	.	NA	PASS	-10	.	.	0.998	0.951	.	0.856	.	.	.	0.362	5.348	25.9	0.992	0.857	-0.64	0.3	0.487	5.9	0.935	9.373	Fibronectin_type_III\x3bImmunoglobulin-like_fold	28,9	0.25	28	9	0.25
BT474_Abe_Res2	chr16_729651_G_A	chr16	729651	G	A	23	exonic	nonsynonymous_SNV	HAGHL	.	HAGHL:NM_001323636:exon8:c.G964A:p.D322N	.	.	16p13.3	.	.	.	.	.	.	NA	PASS	-10	.	.	.	.	.	.	.	.	.	.	.	.	.	.	.	.	.	.	.	.	.	15,7	0.278	15	7	0.278
BT474_Abe_Res2	chr16_734831_G_C	chr16	734831	G	C	76	exonic	nonsynonymous_SNV	CIAO3	.	NARFL:NM_022493:exon5:c.C480G:p.F160L,NARFL:NM_001304799:exon6:c.C174G:p.F58L	.	.	16p13.3	.	.	.	.	.	.	NA	PASS	-10	.	0.561	0.008	0.04	0	1	0.305	1.23	-2.86	0.882	2.641	20.4	0.975	0.918	-0.971	0.06	0.722	1.3	0.135	9.745	Iron_hydrogenase\x3bIron_hydrogenase,_large_subunit,_C-terminal	63,11	0.164	63	11	0.164
BT474_Abe_Res2	chr16_11761483_C_T	chr16	11761483	C	T	66	exonic	nonsynonymous_SNV	ZC3H7A	.	ZC3H7A:NM_014153:exon19:c.G2242A:p.V748M	.	.	16p13.13	.	.	.	.	.	.	NA	PASS	-10	.	0.002	0.998	0.924	0	1	1.7	2.35	-2.44	0.58	6.59	31	0.999	0.992	-1.096	0.102	0.707	5.66	0.935	18.744	.	55,10	0.163	55	10	0.163
BT474_Abe_Res2	chr16_30090993_C_T	chr16	30090993	C	T	53	splicing	.	TBX6	NM_004608:exon3:c.119-1G>A	.	.	.	16p11.2	.	.	.	.	.	.	NA	PASS	-10	.	.	.	.	.	1	.	.	.	.	3.3	22.9	0.976	0.934	.	.	0.167	5.34	0.852	17.808	.	39,12	0.244	39	12	0.244
BT474_Abe_Res2	chr16_70269724_C_T	chr16	70269724	C	T	60	exonic	nonsynonymous_SNV	AARS1	.	AARS:NM_001605:exon7:c.G856A:p.E286K	.	.	16q22.1	.	.	.	.	.	.	NA	PASS	-10	.	0.007	0.311	0.482	0.016	1	1.72	-0.61	-3.01	0.155	5.94	27.6	0.999	0.969	-0.273	0.408	0.672	5.67	0.935	17.264	Alanine-tRNA_ligase,_class_IIc,_anti-codon-binding_domain\x3bAlanyl-tRNA_synthetase,_class_IIc,_N-terminal\x3bAlanyl-tRNA_synthetase,_class_IIc,_core_domain	49,10	0.156	49	10	0.156
BT474_Abe_Res2	chr17_17794138_A_G	chr17	17794138	A	G	113	exonic	nonsynonymous_SNV	RAI1	.	RAI1:NM_030665:exon3:c.A1190G:p.N397S	.	.	17p11.2	.	.	.	.	.	.	NA	PASS	-10	.	0.17	0.615	0.219	0	0.666	1.04	1.27	-1.16	0.203	2.523	19.61	0.996	0.988	-1.028	0.062	0.707	5.55	1.199	15.682	.	86,27	0.229	86	27	0.229
BT474_Abe_Res2	chr17_38562163_C_T	chr17	38562163	C	T	177	exonic	nonsynonymous_SNV	SRCIN1	.	SRCIN1:NM_025248:exon7:c.G1000A:p.G334R	.	.	17q12	.	.	.	.	.	.	NA	PASS	-10	.	.	1	0.997	0	1	1.445	.	.	0.738	5.918	27.5	0.999	0.882	-0.476	0.285	0.598	4.77	0.806	16.561	.	165,6	0.047	165	6	0.047
BT474_Abe_Res2	chr17_40022654_G_A	chr17	40022654	G	A	769	exonic	nonsynonymous_SNV	MED24	.	MED24:NM_001079518:exon20:c.C2384T:p.A795V,MED24:NM_001267797:exon20:c.C2384T:p.A795V,MED24:NM_014815:exon21:c.C2423T:p.A808V,MED24:NM_001330211:exon22:c.C2480T:p.A827V	.	.	17q21.1	.	.	.	.	.	.	NA	PASS	-10	.	0.467	1	0.998	0	1	1.995	1.14	-1.03	0.764	3.128	22.6	0.924	0.986	-0.89	0.185	0.719	5.39	1.048	19.171	Mediator_complex,_subunit_Med24,_N-terminal	724,9	0.011	724	9	0.011
BT474_Abe_Res2	chr17_69106102_C_G	chr17	69106102	C	G	112	exonic	nonsynonymous_SNV	ABCA6	.	ABCA6:NM_080284:exon19:c.G2499C:p.W833C	.	.	17q24.3	.	.	.	.	.	.	NA	PASS	-10	.	0	1	0.999	0	1	2.7	-2.05	-12.47	0.861	6.263	29	0.993	0.977	0.717	0.775	0.707	4.74	0.935	16.801	.	100,10	0.093	100	10	0.093
BT474_Abe_Res2	chr17_75840240_T_G	chr17	75840240	T	G	33	exonic	nonsynonymous_SNV	UNC13D	.	UNC13D:NM_199242:exon10:c.A843C:p.Q281H	.	.	17q25.1	.	.	.	.	.	.	NA	PASS	-10	.	0.076	0.967	0.558	0.005	0.761	0.69	-0.41	-1.66	0.295	3.49	23.1	0.997	0.394	-0.894	0.155	0.672	2.42	0	5.083	C2_domain	27,6	0.234	27	6	0.234
BT474_Abe_Res2	chr18_25227328_G_A	chr18	25227328	G	A	213	exonic	nonsynonymous_SNV	ZNF521	.	ZNF521:NM_015461:exon4:c.C590T:p.T197M	.	.	18q11.2	.	.	.	.	.	.	NA	PASS	-10	.	0.008	0.997	0.932	0	1	2.635	1.74	-2.98	0.466	4.359	24.1	0.863	0.974	-0.597	0.179	0.722	5.98	1.048	15.873	Zinc_finger_C2H2-type/integrase_DNA-binding_domain\x3bZinc_finger,_C2H2	176,33	0.156	176	33	0.156
BT474_Abe_Res2	chr18_56696314_C_T	chr18	56696314	C	T	66	exonic	nonsynonymous_SNV	WDR7	.	WDR7:NM_015285:exon12:c.C1430T:p.S477L,WDR7:NM_052834:exon12:c.C1430T:p.S477L	.	.	18q21.31	.	.	.	.	.	.	NA	PASS	-10	.	0.085	0.911	0.621	0	1	1.555	3.03	-3.45	0.888	5.447	26.1	0.999	0.982	-1.084	0.037	0.638	5.73	0.935	19.855	Quinonprotein_alcohol_dehydrogenase-like_superfamily\x3bWD40-repeat-containing_domain\x3bWD40/YVTN_repeat-like-containing_domain	59,7	0.12	59	7	0.12
BT474_Abe_Res2	chr19_30548471_G_A	chr19	30548471	G	A	240	exonic	nonsynonymous_SNV	ZNF536	.	ZNF536:NM_014717:exon4:c.G2852A:p.G951E	.	.	19q12	.	.	.	.	.	.	NA	PASS	-10	.	0.026	0.181	0.102	0.138	1	0.695	2.99	-1.45	0.302	0.897	10.06	0.875	0.876	-1.002	0.022	0.487	4.38	0.043	15.565	.	202,29	0.127	202	29	0.127
BT474_Abe_Res2	chr19_49311030_C_T	chr19	49311030	C	T	184	exonic	stopgain	SLC6A16	.	SLC6A16:NM_014037:exon2:c.G318A:p.W106X	.	.	19q13.33	.	.	.	.	.	.	NA	PASS	-10	.	.	.	.	0	1	.	.	.	.	10.454	36	0.995	0.984	.	.	0.563	5.27	0.935	17.187	.	166,16	0.103	166	16	0.103
BT474_Abe_Res2	chr20_57266007_G_C	chr20	57266007	G	C	436	exonic	nonsynonymous_SNV	BMP7	.	BMP7:NM_001719:exon1:c.C116G:p.S39W	.	.	20q13.31	.	.	.	.	.	.	NA	PASS	-10	.	0.001	1	1	0	1	2.74	-0.29	-3.34	0.843	6.841	33	0.992	0.99	0.221	0.541	0.652	5.04	0.998	18.385	Transforming_growth_factor-beta,_N-terminal	413,14	0.034	413	14	0.034
BT474_Abe_Res2	chr22_30935133_C_T	chr22	30935133	C	T	154	exonic	nonsynonymous_SNV	MORC2	.	MORC2:NM_001303256:exon19:c.G1841A:p.R614Q,MORC2:NM_001303257:exon19:c.G1841A:p.R614Q,MORC2:NM_014941:exon20:c.G1655A:p.R552Q	.	.	22q12.2	.	.	.	.	.	.	NA	PASS	-10	.	0.265	1	0.992	0	1	1.295	2.61	-0.34	0.643	4.59	24.4	0.999	0.995	-1.139	0.07	0.707	5.76	0.935	18.14	.	125,24	0.162	125	24	0.162
BT474_Abe_Res2	chr22_41658331_G_A	chr22	41658331	G	A	51	exonic	nonsynonymous_SNV	XRCC6	.	XRCC6:NM_001288978:exon10:c.G1351A:p.E451K,XRCC6:NM_001288976:exon11:c.G1501A:p.E501K,XRCC6:NM_001288977:exon11:c.G1378A:p.E460K,XRCC6:NM_001469:exon11:c.G1501A:p.E501K	.	.	22q13.2	.	.	.	.	.	.	NA	PASS	-10	.	0.004	0.996	0.968	0	1	2.295	0.86	-3.26	0.78	7.032	33	0.999	0.995	-0.667	0.291	0.707	5.29	0.9	18.934	Ku70/Ku80_C-terminal_arm\x3bSPOC_like_C-terminal_domain	37,14	0.324	37	14	0.324
BT474_Abe_Res2	chrX_2266788_G_C	chrX	2266788	G	C	168	exonic	nonsynonymous_SNV	DHRSX	.	DHRSX:NM_145177:exon5:c.C548G:p.S183C	.	.	Xp22.33	.	.	.	.	.	.	NA	PASS	-10	.	0	1	1	0	0.621	3.94	-4.17	-4.49	0.841	3.441	23	0.98	0.969	1.126	0.952	.	2.11	0.615	12.246	NAD(P)-binding_domain	142,17	0.11	142	17	0.11
BT474_Abe_Res2	chrX_47223154_G_A	chrX	47223154	G	A	46	exonic	nonsynonymous_SNV	CDK16	.	CDK16:NM_001170460:exon1:c.G59A:p.R20H	.	.	Xp11.3	.	.	.	.	.	.	NA	PASS	-10	.	0.138	0.474	0.026	.	1	0	-0.61	0.15	0.064	0.364	6.299	0.916	0.07	-1.029	0.111	.	1.04	-0.336	3.719	.	38,8	0.182	38	8	0.182
BT474_Abe_Res3	chr1_94203989_C_G	chr1	94203989	C	G	23	exonic	nonsynonymous_SNV	ARHGAP29	.	ARHGAP29:NM_001328665:exon7:c.G511C:p.E171Q,ARHGAP29:NM_001328667:exon7:c.G511C:p.E171Q,ARHGAP29:NM_001328664:exon8:c.G703C:p.E235Q,ARHGAP29:NM_001328666:exon8:c.G703C:p.E235Q,ARHGAP29:NM_004815:exon8:c.G703C:p.E235Q	.	.	1p22.1	.	.	.	.	.	.	NA	PASS	-10	.	0.003	1	0.996	0.003	1	2.865	0.58	-2.93	0.638	5.763	27	0.998	0.962	-0.236	0.353	0.632	5.51	0.807	17.192	.	4,19	0.778	4	19	0.778
BT474_Abe_Res3	chr1_148126839_C_G	chr1	148126839	C	G	34	exonic	nonsynonymous_SNV	NBPF11	.	NBPF11:NM_001101663:exon3:c.G165C:p.Q55H,NBPF11:NM_183372:exon5:c.G327C:p.Q109H	.	.	1q21.2	.	.	.	.	.	.	NA	PASS	-10	.	.	.	.	.	.	.	.	.	.	.	.	.	.	.	.	.	.	.	.	.	16,18	0.524	16	18	0.524
BT474_Abe_Res3	chr2_217818670_G_A	chr2	217818670	G	A	37	exonic	nonsynonymous_SNV	TNS1	.	TNS1:NM_001308023:exon21:c.C3287T:p.S1096L,TNS1:NM_001308022:exon22:c.C3311T:p.S1104L,TNS1:NM_022648:exon24:c.C3350T:p.S1117L	.	.	2q35	.	.	.	.	.	.	NA	PASS	-10	.	0.004	0.999	0.994	0.004	0.999	1.445	-2.98	-2.22	0.516	2.342	18.44	0.999	0.986	0.545	0.808	0.563	4.74	1.048	17.928	.	19,15	0.533	19	15	0.533
BT474_Abe_Res3	chr2_226795210_G_A	chr2	226795210	G	A	52	exonic	nonsynonymous_SNV	IRS1	.	IRS1:NM_005544:exon1:c.C3529T:p.L1177F	.	.	2q36.3	.	.	.	.	.	.	NA	PASS	-10	.	0	0.583	0.077	0	0.991	1.79	-1.41	-2.16	0.724	5.714	26.8	0.999	0.916	-0.203	0.39	0.554	5.97	1.048	15.549	.	24,25	0.487	24	25	0.487
BT474_Abe_Res3	chr2_233819959_G_A	chr2	233819959	G	A	32	exonic	nonsynonymous_SNV	MROH2A	.	MROH2A:NM_001287395:exon31:c.G3424A:p.V1142M	.	.	2q37.1	.	.	.	.	.	.	NA	PASS	-10	.	0.048	.	.	0.001	0.888	1.995	-0.99	-2.07	0.486	2.703	20.8	0.998	0.76	-0.342	0.439	0.497	5.43	0.982	14.726	Armadillo-like_helical\x3bArmadillo-type_fold	13,19	0.574	13	19	0.574
BT474_Abe_Res3	chr4_38829308_C_G	chr4	38829308	C	G	31	exonic	nonsynonymous_SNV	TLR6	.	TLR6:NM_006068:exon2:c.G166C:p.V56L	.	.	4p14	.	.	.	.	.	.	NA	PASS	-10	.	0.209	0.008	0.004	0.596	1	1.14	4.27	-1.15	0.218	0.652	8.512	0.936	0.095	-0.912	0.009	0.776	0.713	0.065	4.264	.	5,25	0.773	5	25	0.773
BT474_Abe_Res3	chr4_106236404_C_T	chr4	106236404	C	T	26	exonic	nonsynonymous_SNV	TBCK	.	TBCK:NM_033115:exon12:c.G1147A:p.D383N,TBCK:NM_001163435:exon14:c.G1336A:p.D446N,TBCK:NM_001163436:exon14:c.G1336A:p.D446N,TBCK:NM_001163437:exon14:c.G1219A:p.D407N,TBCK:NM_001290768:exon15:c.G820A:p.D274N	.	.	4q24	9.627e-06	.	.	.	.	.	NA	PASS	-10	.	0.095	0.623	0.3	0	0.999	0.805	3.06	-0.94	0.191	4.36	24.1	0.996	0.949	-1.032	0.024	0.732	5.87	0.843	20.217	Rab-GTPase-TBC_domain	8,18	0.675	8	18	0.675
BT474_Abe_Res3	chr6_73194463_A_G	chr6	73194463	A	G	43	exonic	nonsynonymous_SNV	KCNQ5	.	KCNQ5:NM_001160134:exon12:c.A1518G:p.I506M,KCNQ5:NM_001160130:exon13:c.A1821G:p.I607M,KCNQ5:NM_001160132:exon14:c.A1878G:p.I626M,KCNQ5:NM_019842:exon14:c.A1848G:p.I616M,KCNQ5:NM_001160133:exon15:c.A1905G:p.I635M	.	.	6q13	.	.	.	.	.	.	NA	PASS	-10	.	0.556	0.998	0.928	0	1	0.78	-6.47	-0.53	0.764	0.262	5.321	0.872	0.161	0.609	0.907	0.487	-11	-0.939	8.011	Potassium_channel,_voltage_dependent,_KCNQ,_C-terminal	16,26	0.6	16	26	0.6
BT474_Abe_Res3	chr6_160578529_C_T	chr6	160578529	C	T	27	exonic	nonsynonymous_SNV	LPA	.	LPA:NM_005577:exon28:c.G4465A:p.E1489K	.	.	6q25.3	.	.	.	.	.	.	NA	PASS	-10	.	0.078	0.713	0.678	.	1	2.015	-2.19	-0.37	0.17	2.925	22	0.996	0.049	-0.515	0.469	0.487	2.37	0.713	5.073	.	10,17	0.545	10	17	0.545
BT474_Abe_Res3	chr7_151082340_C_A	chr7	151082340	C	A	50	exonic	nonsynonymous_SNV	TMUB1	.	TMUB1:NM_001136044:exon2:c.G224T:p.R75I,TMUB1:NM_031434:exon2:c.G224T:p.R75I	.	.	7q36.1	.	.	.	.	.	.	NA	PASS	-10	.	0.074	0.99	0.68	0.091	1	1.67	0.89	-1.57	0.44	4.451	24.2	0.962	0.376	-0.971	0.133	0.742	3.81	0.884	7.24	.	22,27	0.541	22	27	0.541
BT474_Abe_Res3	chr10_32021026_G_C	chr10	32021026	G	C	30	exonic	nonsynonymous_SNV	KIF5B	.	KIF5B:NM_004521:exon19:c.C2200G:p.Q734E	.	.	10p11.22	.	.	.	.	.	.	NA	PASS	-10	.	0.01	0.032	0.041	0	1	1.5	-1.03	-0.87	0.49	3.832	23.4	0.988	0.99	-0.483	0.38	0.707	5.36	0.902	19.071	.	14,15	0.52	14	15	0.52
BT474_Abe_Res3	chr11_119027079_C_G	chr11	119027079	C	G	47	exonic	nonsynonymous_SNV	SLC37A4	.	SLC37A4:NM_001164280:exon5:c.G642C:p.E214D,SLC37A4:NM_001467:exon6:c.G642C:p.E214D,SLC37A4:NM_001164277:exon7:c.G642C:p.E214D,SLC37A4:NM_001164278:exon7:c.G642C:p.E214D,SLC37A4:NM_001164279:exon7:c.G423C:p.E141D	.	.	11q23.3	.	.	.	.	.	.	NA	PASS	-10	.	.	0	0.003	.	.	2.16	.	.	0.107	1.888	15.52	0.745	0.667	.	.	0.257	-0.325	0.852	10.344	Major_facilitator_superfamily_domain	13,33	0.694	13	33	0.694
BT474_Abe_Res3	chr12_100088996_C_G	chr12	100088996	C	G	40	exonic	nonsynonymous_SNV	UHRF1BP1L	.	UHRF1BP1L:NM_001006947:exon8:c.G940C:p.D314H,UHRF1BP1L:NM_015054:exon8:c.G940C:p.D314H	.	.	12q23.1	.	.	.	.	.	.	NA	PASS	-10	.	0.001	1	0.999	0	1	2.015	2.28	-6.1	0.973	5.779	27.1	0.995	0.981	-0.584	0.264	0.732	5.24	0.892	18.834	.	19,21	0.517	19	21	0.517
BT474_Abe_Res3	chr19_37586599_G_T	chr19	37586599	G	T	35	ncRNA_exonic	.	ZNF571-AS1	.	.	.	.	19q13.12	.	.	.	.	.	.	NA	PASS	-10	.	.	.	.	.	.	.	.	.	.	.	.	.	.	.	.	.	.	.	.	.	13,21	0.63	13	21	0.63
BT474_Abe_Res3	chr19_54463591_T_A	chr19	54463591	T	A	14	exonic	nonsynonymous_SNV	LENG9	.	LENG9:NM_198988:exon1:c.A2T:p.K1M	.	.	19q13.42	.	.	.	.	.	.	NA	PASS	-10	.	.	.	.	.	.	.	.	.	.	.	.	.	.	.	.	.	.	.	.	.	0,14	0.9	0	14	0.9
BT474_Abe_Res3	chr1_6571097_T_C	chr1	6571097	T	C	93	exonic	nonsynonymous_SNV	TAS1R1	.	TAS1R1:NM_138697:exon2:c.T380C:p.I127T,TAS1R1:NM_177540:exon2:c.T380C:p.I127T	.	0.00858626	1p36.31	0.0031	.	.	.	.	.	NA	PASS	-10	0.0041	0.038	0.962	0.423	0.197	1	2.1	-1.59	-1.57	0.353	0.482	7.29	0.989	0.218	-1.019	0.08	0.447	3.96	1.049	8.124	Extracellular_ligand-binding_receptor\x3bPeriplasmic_binding_protein-like_I	78,10	0.106	78	10	0.106
BT474_Abe_Res3	chr1_156126216_G_A	chr1	156126216	G	A	42	exonic	nonsynonymous_SNV	LMNA	.	LMNA:NM_001257374:exon1:c.G13A:p.E5K	.	.	1q22	.	.	.	.	.	.	NA	PASS	-10	.	0.641	0.003	0.001	.	1	.	-1.62	0.95	0.109	0.842	9.723	0.921	0.063	-0.896	0.096	0.394	-3.68	-0.326	12.656	.	36,6	0.167	36	6	0.167
BT474_Abe_Res3	chr1_173833490_A_G	chr1	173833490	A	G	177	exonic	nonsynonymous_SNV	DARS2	.	DARS2:NM_018122:exon6:c.A607G:p.N203D	.	.	1q25.1	.	.	.	.	.	.	NA	PASS	-10	.	0.135	0.768	0.56	0	1	-0.695	-1.77	-2.67	0.166	2.921	21.9	0.996	0.977	-0.686	0.141	0.732	4.82	1.199	10.88	Aminoacyl-tRNA_synthetase,_class_II\x3bAminoacyl-tRNA_synthetase,_class_II_(D/K/N)	167,9	0.057	167	9	0.057
BT474_Abe_Res3	chr1_247156779_C_G	chr1	247156779	C	G	214	exonic	nonsynonymous_SNV	ZNF124	.	ZNF124:NM_001297568:exon4:c.G843C:p.E281D,ZNF124:NM_003431:exon4:c.G657C:p.E219D	.	.	1q44	.	.	.	.	.	.	NA	PASS	-10	.	0.02	0.965	0.82	.	1	1.92	3.18	-2.54	0.088	3.537	23.1	0.982	0	-1.055	0.065	0.672	-0.229	-0.508	3.827	Zinc_finger_C2H2-type/integrase_DNA-binding_domain\x3bZinc_finger,_C2H2\x3bZinc_finger,_C2H2-like	196,9	0.041	196	9	0.041
BT474_Abe_Res3	chr2_27664063_G_A	chr2	27664063	G	A	140	exonic	nonsynonymous_SNV	SLC4A1AP	.	SLC4A1AP:NM_018158:exon1:c.G311A:p.G104E	.	.	2p23.3	.	.	.	.	.	.	NA	PASS	-10	.	1	0.002	0.004	0.286	1	0	1.46	0.58	0.063	-0.282	0.731	0.8	0.024	-1.044	0.04	0.442	3.39	0.016	10.072	.	121,12	0.104	121	12	0.104
BT474_Abe_Res3	chr2_178593281_C_G	chr2	178593281	C	G	65	exonic	nonsynonymous_SNV	TTN	.	TTN:NM_003319:exon127:c.G31732C:p.D10578H,TTN:NM_133432:exon128:c.G32107C:p.D10703H,TTN:NM_133437:exon128:c.G32308C:p.D10770H,TTN:NM_133378:exon248:c.G51223C:p.D17075H,TTN:NM_001256850:exon249:c.G54004C:p.D18002H,TTN:NM_001267550:exon299:c.G58927C:p.D19643H	.	.	2q31.2	.	.	.	.	.	.	NA	PASS	-10	.	0.077	0.999	0.966	.	1	2.42	0.44	-4.77	0.525	2.382	18.7	0.881	0.984	-0.323	0.384	0.554	6.16	0.935	20.86	Fibronectin_type_III\x3bImmunoglobulin_I-set\x3bImmunoglobulin_subtype\x3bImmunoglobulin-like_domain\x3bImmunoglobulin-like_fold	56,6	0.115	56	6	0.115
BT474_Abe_Res3	chr2_178707586_C_G	chr2	178707586	C	G	67	exonic	nonsynonymous_SNV	TTN	.	TTN:NM_133378:exon97:c.G25249C:p.V8417L,TTN:NM_001256850:exon98:c.G28030C:p.V9344L,TTN:NM_001267550:exon100:c.G28981C:p.V9661L	.	.	2q31.2	.	.	.	.	.	.	NA	PASS	-10	.	0.51	0.003	0.003	.	1	0.145	1.1	-1.28	0.321	2.895	21.8	0.911	0.815	-1.082	0.06	0.554	4.79	0.935	9.582	Immunoglobulin_I-set\x3bImmunoglobulin_V-set_domain\x3bImmunoglobulin_subtype\x3bImmunoglobulin_subtype_2\x3bImmunoglobulin-like_domain\x3bImmunoglobulin-like_fold	56,8	0.127	56	8	0.127
BT474_Abe_Res3	chr3_30606885_T_C	chr3	30606885	T	C	37	exonic	startloss	TGFBR2	.	TGFBR2:NM_001024847:exon1:c.T2C:p.M1?,TGFBR2:NM_003242:exon1:c.T2C:p.M1?	.	.	3p24.1	.	.	.	.	.	.	NA	PASS	-10	.	0	0.717	0.599	.	1	.	-2.11	-0.01	0.845	5.095	25.3	0.989	0.365	0.428	0.686	0.733	3.88	0.733	9.229	.	29,7	0.226	29	7	0.226
BT474_Abe_Res3	chr3_52491938_A_T	chr3	52491938	A	T	111	exonic	nonsynonymous_SNV	NISCH	.	NISCH:NM_007184:exon21:c.A3971T:p.E1324V	.	.	3p21.1	.	.	.	.	.	.	NA	PASS	-10	.	0.001	0.999	0.996	0	1	0.975	2.94	-3.18	0.607	5.378	25.9	0.995	0.958	-1.146	0.059	0.722	5.6	1.14	15.784	.	96,14	0.136	96	14	0.136
BT474_Abe_Res3	chr5_40854330_C_T	chr5	40854330	C	T	109	exonic	nonsynonymous_SNV	CARD6	.	CARD6:NM_032587:exon3:c.C2998T:p.P1000S	.	.	5p13.1	2.825e-05	.	.	.	.	.	NA	PASS	-10	.	1	0.001	0	0.298	1	0	-3.78	0.96	0.074	-1.388	0.003	0.114	0.001	-0.444	0.545	0.707	1.83	0.024	5.33	.	99,6	0.07	99	6	0.07
BT474_Abe_Res3	chr5_179114025_C_A	chr5	179114025	C	A	150	exonic	nonsynonymous_SNV	ADAMTS2	.	ADAMTS2:NM_014244:exon22:c.G3478T:p.A1160S	.	.	5q35.3	.	.	.	.	.	.	NA	PASS	-10	.	0.081	0.919	0.395	0	1	0.55	0.18	-0.44	0.286	1.608	13.9	0.985	0.916	-0.987	0.117	0.615	4.18	0.852	9.169	.	132,16	0.102	132	16	0.102
BT474_Abe_Res3	chr6_41158972_G_A	chr6	41158972	G	A	86	exonic	nonsynonymous_SNV	TREM2	.	TREM2:NM_018965:exon4:c.C577T:p.L193F	ID\x3dCOSM73059\x3bOCCURENCE\x3d1(ovary)	.	6p21.1	9.432e-06	.	.	.	.	.	NA	PASS	-10	.	0.008	0.064	0.031	0.004	1	1.845	0.3	-1.92	0.346	4.981	25.1	0.996	0.779	-0.902	0.103	0.554	4.04	1.038	10.741	.	75,10	0.123	75	10	0.123
BT474_Abe_Res3	chr7_50447134_G_T	chr7	50447134	G	T	110	exonic	nonsynonymous_SNV	FIGNL1	.	FIGNL1:NM_001287495:exon2:c.C154A:p.Q52K,FIGNL1:NM_001287493:exon3:c.C154A:p.Q52K,FIGNL1:NM_001287494:exon3:c.C154A:p.Q52K,FIGNL1:NM_001042762:exon4:c.C154A:p.Q52K,FIGNL1:NM_001287492:exon4:c.C154A:p.Q52K,FIGNL1:NM_001346561:exon4:c.C154A:p.Q52K,FIGNL1:NM_001346562:exon4:c.C154A:p.Q52K,FIGNL1:NM_001346564:exon4:c.C154A:p.Q52K,FIGNL1:NM_022116:exon4:c.C154A:p.Q52K,FIGNL1:NM_001346560:exon5:c.C154A…	.	.	7p12.2	.	.	.	.	.	.	NA	PASS	-10	.	0.258	0.104	0.058	0.001	0.979	1.87	2.01	-1.09	0.475	1.931	15.78	0.973	0.85	-1.092	0.06	0.757	5.1	0.133	14.494	.	101,7	0.08	101	7	0.08
BT474_Abe_Res3	chr8_85655229_G_A	chr8	85655229	G	A	68	ncRNA_exonic	.	REXO1L2P	.	.	.	.	8q21.2	.	.	.	.	.	.	NA	PASS	-10	.	.	.	.	.	.	.	.	.	.	.	.	.	.	.	.	.	.	.	.	.	60,6	0.123	60	6	0.123
BT474_Abe_Res3	chr9_99828080_C_T	chr9	99828080	C	T	139	exonic	nonsynonymous_SNV	NR4A3	.	NR4A3:NM_006981:exon3:c.C38T:p.P13L,NR4A3:NM_173199:exon3:c.C38T:p.P13L,NR4A3:NM_173200:exon4:c.C71T:p.P24L	.	.	9q31.1	.	.	.	.	.	.	NA	PASS	-10	.	0.067	0.993	0.855	0	1	1.845	-2.44	-3.05	0.45	6.132	28.4	0.999	0.949	0.656	0.777	0.549	5.77	0.935	14.791	.	116,21	0.155	116	21	0.155
BT474_Abe_Res3	chr9_128276748_G_C	chr9	128276748	G	C	110	exonic	nonsynonymous_SNV	SWI5	.	SWI5:NM_001040011:exon2:c.G419C:p.R140P,SWI5:NM_001318089:exon2:c.G299C:p.R100P,SWI5:NM_001318092:exon2:c.G131C:p.R44P	.	.	9q34.11	.	.	.	.	.	.	NA	PASS	-10	.	0.18	0.158	0.031	0.025	1	0.695	.	-0.13	0.5	4.966	25.1	0.979	0.693	-1.075	0.039	0.442	-0.781	-0.216	0.943	.	96,11	0.129	96	11	0.129
BT474_Abe_Res3	chr9_132814700_G_A	chr9	132814700	G	A	114	exonic	nonsynonymous_SNV	AK8	.	AK8:NM_001317958:exon10:c.C305T:p.A102V,AK8:NM_152572:exon10:c.C917T:p.A306V,AK8:NM_001317959:exon12:c.C401T:p.A134V	.	.	9q34.13	.	.	.	.	.	.	NA	PASS	-10	.	0.219	0.368	0.199	0.006	0.929	2.455	-1.13	-1.93	0.186	3.645	23.2	0.995	0.822	-0.281	0.444	0.554	4.35	0.953	15.827	P-loop_containing_nucleoside_triphosphate_hydrolase	94,19	0.142	94	19	0.142
BT474_Abe_Res3	chr10_101526195_G_C	chr10	101526195	G	C	43	exonic	nonsynonymous_SNV	BTRC	.	BTRC:NM_001256856:exon5:c.G661C:p.G221R,BTRC:NM_003939:exon5:c.G631C:p.G211R,BTRC:NM_033637:exon6:c.G739C:p.G247R	.	.	10q24.32	.	.	.	.	.	.	NA	PASS	-10	.	0.064	0.937	0.51	0	1	2.71	1.83	-5.58	0.499	3.386	23	0.998	0.946	-0.845	0.126	0.706	5.33	1.048	19.03	F-box_domain	35,7	0.187	35	7	0.187
BT474_Abe_Res3	chr11_8699367_G_C	chr11	8699367	G	C	56	exonic	nonsynonymous_SNV	DENND2B	.	ST5:NM_139157:exon14:c.C1484G:p.A495G,ST5:NM_213618:exon15:c.C2744G:p.A915G,ST5:NM_005418:exon18:c.C2744G:p.A915G	.	.	11p15.4	.	.	.	.	.	.	NA	PASS	-10	.	0.003	1	0.998	0	1	2.15	2.18	-3.49	0.836	6.811	32	0.998	0.971	-0.921	0.157	0.731	5.82	1.048	20.085	DENN_domain	49,7	0.146	49	7	0.146
BT474_Abe_Res3	chr11_17642229_G_C	chr11	17642229	G	C	63	exonic	nonsynonymous_SNV	OTOG	.	OTOG:NM_001277269:exon52:c.G8434C:p.E2812Q,OTOG:NM_001292063:exon53:c.G8398C:p.E2800Q	.	.	11p15.1	.	.	.	.	.	.	NA	PASS	-10	.	0.007	.	.	0	1	1.15	2.21	-2.29	0.373	4.329	24	0.997	0.991	-1.147	0.064	0.554	4.98	0.998	18.246	Cystine_knot,_C-terminal	56,6	0.093	56	6	0.093
BT474_Abe_Res3	chr11_65505659_C_A	chr11	65505659	C	A	346	ncRNA_exonic	.	MALAT1;TALAM1	.	.	.	.	11q13.1	.	.	.	.	.	.	NA	PASS	-10	.	.	.	.	.	.	.	.	.	.	.	.	.	.	.	.	.	.	.	.	.	326,13	0.038	326	13	0.038
BT474_Abe_Res3	chr11_70435618_C_G	chr11	70435618	C	G	187	exonic	stopgain	CTTN	.	CTTN:NM_001184740:exon18:c.C1652G:p.S551X	.	.	11q13.3	.	.	.	.	.	.	NA	PASS	-10	.	.	.	.	.	1	.	.	.	.	6.977	33	0.872	0.099	.	.	0.706	-5.74	0.002	0.13	.	174,10	0.051	174	10	0.051
BT474_Abe_Res3	chr11_73309636_C_T	chr11	73309636	C	T	388	exonic	nonsynonymous_SNV	ARHGEF17	.	ARHGEF17:NM_014786:exon1:c.C998T:p.P333L	.	.	11q13.4	.	.	.	.	.	.	NA	PASS	-10	.	0.001	0.9	0.433	0.001	0.996	0.695	0.46	-1.09	0.485	4.768	24.7	0.998	0.298	-0.951	0.11	0.658	4.02	0.851	9.808	.	370,8	0.025	370	8	0.025
BT474_Abe_Res3	chr11_77157288_G_C	chr11	77157288	G	C	118	exonic	nonsynonymous_SNV	MYO7A	.	MYO7A:NM_000260:exon8:c.G745C:p.E249Q,MYO7A:NM_001127179:exon8:c.G745C:p.E249Q,MYO7A:NM_001127180:exon8:c.G745C:p.E249Q	.	.	11q13.5	.	.	.	.	.	.	NA	PASS	-10	.	0	1	1	0	1	4.65	-1.49	-2.53	0.941	4.404	24.1	0.997	0.997	0.948	0.825	0.615	4.92	0.951	17.722	Myosin_head,_motor_domain\x3bP-loop_containing_nucleoside_triphosphate_hydrolase	100,13	0.114	100	13	0.114
BT474_Abe_Res3	chr13_106493425_G_C	chr13	106493425	G	C	98	exonic	nonsynonymous_SNV	EFNB2	.	EFNB2:NM_004093:exon5:c.C617G:p.S206C	ID\x3dCOSM1730808\x3bOCCURENCE\x3d1(liver)	.	13q33.3	.	.	.	.	.	.	NA	PASS	-10	.	0.027	0.002	0.005	0.002	0.834	1.15	-2.79	-2.37	0.352	3.541	23.1	0.976	0.935	-0.14	0.637	0.719	6.17	1.048	20.879	.	83,10	0.123	83	10	0.123
BT474_Abe_Res3	chr14_22978953_C_G	chr14	22978953	C	G	142	exonic	nonsynonymous_SNV	AJUBA	.	AJUBA:NM_001289097:exon2:c.G1090C:p.E364Q	.	.	14q11.2	.	.	.	.	.	.	NA	PASS	-10	.	.	.	.	.	.	.	.	.	.	.	.	.	.	.	.	.	.	.	.	.	133,6	0.049	133	6	0.049
BT474_Abe_Res3	chr15_82344920_ATAGCCTCTCCTCCTGTTCACATAGCCTCTCCTCCTGTTCACGTAGCCTCTCCTCCTGTTCACACAGCCTCTCCTCCTGTTCACATAGCCTCTCCTCCTGTTCACGTAGCCTCTCCTCCTGTTCACG_A	chr15	82344920	ATAGCCTCTCCTCCTGTTCACATAGCCTCTCCTCCTGTTCACGTAGCCTCTCCTCCTGTTCACACAGCCTCTCCTCCTGTTCACATAGCCTCTCCTCCTGTTCACGTAGCCTCTCCTCCTGTTCACG	A	17	exonic	nonframeshift_deletion	GOLGA6L10	.	GOLGA6L10:NM_001164465:exon6:c.814_939del:p.R272_L313del,GOLGA6L10:NM_001322400:exon6:c.814_939del:p.H272_L313del	.	.	15q25.2	.	.	.	.	.	.	NA	PASS	-10	.	.	.	.	.	.	.	.	.	.	.	.	.	.	.	.	.	.	.	.	.	9,8	0.456	9	8	0.456
BT474_Abe_Res3	chr16_3224535_G_A	chr16	3224535	G	A	49	exonic	nonsynonymous_SNV	ZNF200	.	ZNF200:NM_001145446:exon5:c.C542T:p.S181L,ZNF200:NM_001145447:exon5:c.C542T:p.S181L,ZNF200:NM_001145448:exon5:c.C542T:p.S181L,ZNF200:NM_003454:exon5:c.C545T:p.S182L,ZNF200:NM_198087:exon5:c.C542T:p.S181L,ZNF200:NM_198088:exon5:c.C545T:p.S182L	ID\x3dCOSM2918900\x3bOCCURENCE\x3d1(urinary_tract)	.	16p13.3	.	.	.	.	.	.	NA	PASS	-10	.	0.428	0.004	0.011	0.67	1	1.7	3.32	-0.56	0.083	-0.249	0.864	0.956	0.001	-0.961	0.021	0.707	1.14	-0.529	4.636	.	43,6	0.111	43	6	0.111
BT474_Abe_Res3	chr16_11761483_C_T	chr16	11761483	C	T	78	exonic	nonsynonymous_SNV	ZC3H7A	.	ZC3H7A:NM_014153:exon19:c.G2242A:p.V748M	.	.	16p13.13	.	.	.	.	.	.	NA	PASS	-10	.	0.002	0.998	0.924	0	1	1.7	2.35	-2.44	0.58	6.59	31	0.999	0.992	-1.096	0.102	0.707	5.66	0.935	18.744	.	71,7	0.125	71	7	0.125
BT474_Abe_Res3	chr16_31064045_G_A	chr16	31064045	G	A	88	exonic	nonsynonymous_SNV	ZNF668	.	ZNF668:NM_001172668:exon2:c.C415T:p.P139S,ZNF668:NM_001172670:exon2:c.C415T:p.P139S,ZNF668:NM_024706:exon2:c.C415T:p.P139S,ZNF668:NM_001172669:exon3:c.C484T:p.P162S	.	.	16p11.2	.	.	.	.	.	.	NA	PASS	-10	.	0.06	1	0.996	0	1	2.015	2.1	-6.9	0.712	5.404	26	0.999	0.998	-0.962	0.137	0.672	4.93	1.045	17.07	Zinc_finger_C2H2-type/integrase_DNA-binding_domain\x3bZinc_finger,_C2H2\x3bZinc_finger,_C2H2-like	80,6	0.059	80	6	0.059
BT474_Abe_Res3	chr16_70269724_C_T	chr16	70269724	C	T	80	exonic	nonsynonymous_SNV	AARS1	.	AARS:NM_001605:exon7:c.G856A:p.E286K	.	.	16q22.1	.	.	.	.	.	.	NA	PASS	-10	.	0.007	0.311	0.482	0.016	1	1.72	-0.61	-3.01	0.155	5.94	27.6	0.999	0.969	-0.273	0.408	0.672	5.67	0.935	17.264	Alanine-tRNA_ligase,_class_IIc,_anti-codon-binding_domain\x3bAlanyl-tRNA_synthetase,_class_IIc,_N-terminal\x3bAlanyl-tRNA_synthetase,_class_IIc,_core_domain	70,7	0.098	70	7	0.098
BT474_Abe_Res3	chr17_17794138_A_G	chr17	17794138	A	G	119	exonic	nonsynonymous_SNV	RAI1	.	RAI1:NM_030665:exon3:c.A1190G:p.N397S	.	.	17p11.2	.	.	.	.	.	.	NA	PASS	-10	.	0.17	0.615	0.219	0	0.666	1.04	1.27	-1.16	0.203	2.523	19.61	0.996	0.988	-1.028	0.062	0.707	5.55	1.199	15.682	.	109,9	0.074	109	9	0.074
BT474_Abe_Res3	chr17_39408053_C_T	chr17	39408053	C	T	788	exonic	nonsynonymous_SNV	MED1	.	MED1:NM_004774:exon17:c.G4168A:p.A1390T	.	.	17q12	.	.	.	.	.	.	NA	PASS	-10	.	0	0.99	0.868	.	1	0.695	0.83	-0.66	0.51	4.085	23.7	0.999	0.978	-0.758	0.173	0.707	4.34	0.852	17.42	.	757,6	0.01	757	6	0.01
BT474_Abe_Res3	chr17_67948163_C_T	chr17	67948163	C	T	147	exonic	nonsynonymous_SNV	BPTF	.	BPTF:NM_182641:exon23:c.C7783T:p.R2595C,BPTF:NM_004459:exon25:c.C7732T:p.R2578C	ID\x3dCOSM193902,COSM193903\x3bOCCURENCE\x3d1(large_intestine)	.	17q24.2	.	.	.	.	.	.	NA	PASS	-10	.	0.001	1	0.992	.	1	2.095	2.72	-5.05	0.632	7.921	35	0.998	0.967	-0.147	0.437	0.707	5.53	0.935	19.448	.	137,6	0.059	137	6	0.059
BT474_Abe_Res3	chr17_82101809_G_A	chr17	82101809	G	A	117	exonic	nonsynonymous_SNV	CCDC57	.	CCDC57:NM_198082:exon17:c.C2621T:p.A874V	.	.	17q25.3	.	.	.	.	.	.	NA	PASS	-10	.	0.056	0.884	0.26	.	1	0.805	2.57	-1.03	0.223	1.957	15.94	0.989	0.184	-1.019	0.058	0.632	1.22	1.048	5.226	.	108,6	0.047	108	6	0.047
BT474_Abe_Res3	chr18_25227328_G_A	chr18	25227328	G	A	195	exonic	nonsynonymous_SNV	ZNF521	.	ZNF521:NM_015461:exon4:c.C590T:p.T197M	.	.	18q11.2	.	.	.	.	.	.	NA	PASS	-10	.	0.008	0.997	0.932	0	1	2.635	1.74	-2.98	0.466	4.359	24.1	0.863	0.974	-0.597	0.179	0.722	5.98	1.048	15.873	Zinc_finger_C2H2-type/integrase_DNA-binding_domain\x3bZinc_finger,_C2H2	179,11	0.062	179	11	0.062
BT474_Abe_Res3	chr18_56696314_C_T	chr18	56696314	C	T	69	exonic	nonsynonymous_SNV	WDR7	.	WDR7:NM_015285:exon12:c.C1430T:p.S477L,WDR7:NM_052834:exon12:c.C1430T:p.S477L	.	.	18q21.31	.	.	.	.	.	.	NA	PASS	-10	.	0.085	0.911	0.621	0	1	1.555	3.03	-3.45	0.888	5.447	26.1	0.999	0.982	-1.084	0.037	0.638	5.73	0.935	19.855	Quinonprotein_alcohol_dehydrogenase-like_superfamily\x3bWD40-repeat-containing_domain\x3bWD40/YVTN_repeat-like-containing_domain	58,9	0.149	58	9	0.149
BT474_Abe_Res3	chr19_7745990_TGA_T	chr19	7745990	TGA	T	132	exonic	frameshift_deletion	CD209	.	CD209:NM_001144893:exon2:c.142_143del:p.S48Rfs*21,CD209:NM_001144894:exon2:c.142_143del:p.S48Rfs*21,CD209:NM_001144896:exon3:c.202_203del:p.S68Rfs*21,CD209:NM_001144895:exon4:c.274_275del:p.S92Rfs*21,CD209:NM_001144897:exon4:c.274_275del:p.S92Rfs*21,CD209:NM_021155:exon4:c.274_275del:p.S92Rfs*21	.	.	19p13.2	.	.	.	.	.	.	NA	PASS	-10	.	.	.	.	.	.	.	.	.	.	.	.	.	.	.	.	.	.	.	.	.	124,6	0.053	124	6	0.053
BT474_Abe_Res3	chr19_30548471_G_A	chr19	30548471	G	A	211	exonic	nonsynonymous_SNV	ZNF536	.	ZNF536:NM_014717:exon4:c.G2852A:p.G951E	.	.	19q12	.	.	.	.	.	.	NA	PASS	-10	.	0.026	0.181	0.102	0.138	1	0.695	2.99	-1.45	0.302	0.897	10.06	0.875	0.876	-1.002	0.022	0.487	4.38	0.043	15.565	.	187,14	0.07	187	14	0.07
BT474_Abe_Res3	chr19_49311030_C_T	chr19	49311030	C	T	189	exonic	stopgain	SLC6A16	.	SLC6A16:NM_014037:exon2:c.G318A:p.W106X	.	.	19q13.33	.	.	.	.	.	.	NA	PASS	-10	.	.	.	.	0	1	.	.	.	.	10.454	36	0.995	0.984	.	.	0.563	5.27	0.935	17.187	.	181,6	0.041	181	6	0.041
BT474_Abe_Res3	chr20_25526545_C_G	chr20	25526545	C	G	112	exonic	nonsynonymous_SNV	NINL	.	NINL:NM_001318226:exon2:c.G43C:p.V15L,NINL:NM_025176:exon2:c.G43C:p.V15L	.	.	20p11.21	.	.	.	.	.	.	NA	PASS	-10	.	0.724	0.034	0.021	0.013	1	0.435	1.4	-0.33	0.097	0.047	3.056	0.505	0.174	-1.071	0.04	0.732	-0.262	0.935	2.465	EF-hand_domain\x3bEF-hand_domain_pair	103,6	0.069	103	6	0.069
BT474_Abe_Res3	chr20_57266007_G_C	chr20	57266007	G	C	435	exonic	nonsynonymous_SNV	BMP7	.	BMP7:NM_001719:exon1:c.C116G:p.S39W	.	.	20q13.31	.	.	.	.	.	.	NA	PASS	-10	.	0.001	1	1	0	1	2.74	-0.29	-3.34	0.843	6.841	33	0.992	0.99	0.221	0.541	0.652	5.04	0.998	18.385	Transforming_growth_factor-beta,_N-terminal	421,9	0.024	421	9	0.024
BT474_Abe_Res3	chr22_30935133_C_T	chr22	30935133	C	T	151	exonic	nonsynonymous_SNV	MORC2	.	MORC2:NM_001303256:exon19:c.G1841A:p.R614Q,MORC2:NM_001303257:exon19:c.G1841A:p.R614Q,MORC2:NM_014941:exon20:c.G1655A:p.R552Q	.	.	22q12.2	.	.	.	.	.	.	NA	PASS	-10	.	0.265	1	0.992	0	1	1.295	2.61	-0.34	0.643	4.59	24.4	0.999	0.995	-1.139	0.07	0.707	5.76	0.935	18.14	.	132,16	0.118	132	16	0.118
BT474_Abe_Res3	chr22_41658331_G_A	chr22	41658331	G	A	72	exonic	nonsynonymous_SNV	XRCC6	.	XRCC6:NM_001288978:exon10:c.G1351A:p.E451K,XRCC6:NM_001288976:exon11:c.G1501A:p.E501K,XRCC6:NM_001288977:exon11:c.G1378A:p.E460K,XRCC6:NM_001469:exon11:c.G1501A:p.E501K	.	.	22q13.2	.	.	.	.	.	.	NA	PASS	-10	.	0.004	0.996	0.968	0	1	2.295	0.86	-3.26	0.78	7.032	33	0.999	0.995	-0.667	0.291	0.707	5.29	0.9	18.934	Ku70/Ku80_C-terminal_arm\x3bSPOC_like_C-terminal_domain	64,7	0.102	64	7	0.102
BT474_Abe_Res3	chrX_53248154_C_G	chrX	53248154	C	G	121	exonic	nonsynonymous_SNV	IQSEC2	.	IQSEC2:NM_001111125:exon7:c.G2542C:p.G848R,IQSEC2:NM_015075:exon7:c.G1927C:p.G643R	.	.	Xp11.22	.	.	.	.	.	.	NA	PASS	-10	.	0	1	1	0	1	3.64	-1.51	-7.61	0.872	6.449	29.8	0.999	0.989	0.806	0.777	.	5.63	0.935	17.398	Sec7_domain\x3bSec7_domain,_alpha_orthogonal_bundle	107,14	0.124	107	14	0.124
BT474_Palbo_Res1	chr1_51933435_G_C	chr1	51933435	G	C	47	exonic	nonsynonymous_SNV	RAB3B	.	RAB3B:NM_002867:exon4:c.C355G:p.Q119E	.	0.000199681	1p32.3	9.488e-06	.	.	.	.	.	NA	PASS	-10	.	0.158	0.957	0.532	0	1	-1.47	-0.81	-1.59	0.71	1.535	13.5	0.993	0.99	-0.697	0.135	0.732	5.15	1.048	18.404	P-loop_containing_nucleoside_triphosphate_hydrolase\x3bSmall_GTP-binding_protein_domain	20,26	0.595	20	26	0.595
BT474_Palbo_Res1	chr1_94203989_C_G	chr1	94203989	C	G	31	exonic	nonsynonymous_SNV	ARHGAP29	.	ARHGAP29:NM_001328665:exon7:c.G511C:p.E171Q,ARHGAP29:NM_001328667:exon7:c.G511C:p.E171Q,ARHGAP29:NM_001328664:exon8:c.G703C:p.E235Q,ARHGAP29:NM_001328666:exon8:c.G703C:p.E235Q,ARHGAP29:NM_004815:exon8:c.G703C:p.E235Q	.	.	1p22.1	.	.	.	.	.	.	NA	PASS	-10	.	0.003	1	0.996	0.003	1	2.865	0.58	-2.93	0.638	5.763	27	0.998	0.962	-0.236	0.353	0.632	5.51	0.807	17.192	.	12,18	0.609	12	18	0.609
BT474_Palbo_Res1	chr1_148126839_C_G	chr1	148126839	C	G	28	exonic	nonsynonymous_SNV	NBPF11	.	NBPF11:NM_001101663:exon3:c.G165C:p.Q55H,NBPF11:NM_183372:exon5:c.G327C:p.Q109H	.	.	1q21.2	.	.	.	.	.	.	NA	PASS	-10	.	.	.	.	.	.	.	.	.	.	.	.	.	.	.	.	.	.	.	.	.	7,20	0.682	7	20	0.682
BT474_Palbo_Res1	chr2_17781591_G_C	chr2	17781591	G	C	41	exonic	nonsynonymous_SNV	GEN1	.	GEN1:NM_001130009:exon14:c.G2379C:p.K793N,GEN1:NM_182625:exon14:c.G2379C:p.K793N	.	.	2p24.2	.	.	.	.	.	.	NA	PASS	-10	.	0.337	0.049	0.018	0.275	1	1.445	1.73	-0.43	0.04	2.189	17.44	0.987	0.657	-1.044	0.043	0.707	-0.21	0.079	5.284	.	19,21	0.543	19	21	0.543
BT474_Palbo_Res1	chr2_74047038_C_G	chr2	74047038	C	G	43	exonic	nonsynonymous_SNV	TET3	.	TET3:NM_001287491:exon3:c.C1121G:p.S374C	.	.	2p13.1	.	.	.	.	.	.	NA	PASS	-10	.	0.004	0.993	0.628	.	0.989	0.345	1.77	-1.72	0.215	4.176	23.8	0.988	0.672	-1.05	0.06	0.632	5.84	0.935	13.82	.	14,28	0.629	14	28	0.629
BT474_Palbo_Res1	chr2_203171941_G_C	chr2	203171941	G	C	14	exonic	nonsynonymous_SNV	NBEAL1	.	NBEAL1:NM_001114132:exon39:c.G6029C:p.R2010T	.	.	2q33.2	.	.	.	.	.	.	NA	PASS	-10	.	0	1	0.998	0	1	3.835	-1.11	-5.6	0.87	6.582	31	0.989	0.995	0.702	0.751	0.615	5.26	1.048	18.829	BEACH_domain	8,6	0.5	8	6	0.5
BT474_Palbo_Res1	chr2_219566873_G_T	chr2	219566873	G	T	62	exonic	nonsynonymous_SNV	OBSL1	.	OBSL1:NM_001173408:exon5:c.C2091A:p.F697L,OBSL1:NM_001173431:exon5:c.C2091A:p.F697L,OBSL1:NM_015311:exon5:c.C2091A:p.F697L	.	.	2q35	.	.	.	.	.	.	NA	PASS	-10	.	0	0.998	0.998	.	1	1.58	1.03	-5.05	0.785	5.416	26	0.998	0.826	-0.928	0.161	0.722	3.43	1.045	6.79	Immunoglobulin_subtype	31,30	0.521	31	30	0.521
BT474_Palbo_Res1	chr4_38829308_C_G	chr4	38829308	C	G	37	exonic	nonsynonymous_SNV	TLR6	.	TLR6:NM_006068:exon2:c.G166C:p.V56L	.	.	4p14	.	.	.	.	.	.	NA	PASS	-10	.	0.209	0.008	0.004	0.596	1	1.14	4.27	-1.15	0.218	0.652	8.512	0.936	0.095	-0.912	0.009	0.776	0.713	0.065	4.264	.	9,26	0.697	9	26	0.697
BT474_Palbo_Res1	chr4_173377305_A_T	chr4	173377305	A	T	42	exonic	nonsynonymous_SNV	SAP30	.	SAP30:NM_003864:exon4:c.A641T:p.K214M	.	.	4q34.1	.	.	.	.	.	.	NA	PASS	-10	.	0	0.999	0.995	0.002	1	2.11	.	-5.18	0.742	6.135	28.4	0.996	0.998	-0.15	0.409	0.732	5.18	1.088	15.035	.	11,31	0.749	11	31	0.749
BT474_Palbo_Res1	chr5_178712769_C_A	chr5	178712769	C	A	35	exonic	nonsynonymous_SNV	ZNF354A	.	ZNF354A:NM_001324339:exon4:c.G983T:p.R328L,ZNF354A:NM_005649:exon5:c.G1109T:p.R370L	.	.	5q35.3	9.455e-06	.	.	.	.	.	NA	PASS	-10	.	0.08	0.956	0.793	0.005	0.577	1.32	1.04	-0.4	0.742	3.587	23.2	0.993	0.001	-0.861	0.139	0.732	4.03	0.848	10.068	Zinc_finger_C2H2-type/integrase_DNA-binding_domain\x3bZinc_finger,_C2H2\x3bZinc_finger,_C2H2-like	8,26	0.75	8	26	0.75
BT474_Palbo_Res1	chr6_21595661_C_T	chr6	21595661	C	T	27	exonic	nonsynonymous_SNV	SOX4	.	SOX4:NM_003107:exon1:c.C1127T:p.S376L	.	.	6p22.3	.	.	.	.	.	.	NA	PASS	-10	.	0.004	0.962	0.231	0.089	0.648	1.445	-4.83	-2.33	0.256	5.826	27.2	0.997	0.562	0.637	0.804	0.733	3.65	0.807	14.443	.	9,16	0.609	9	16	0.609
BT474_Palbo_Res1	chr6_154450121_C_G	chr6	154450121	C	G	37	exonic	nonsynonymous_SNV	CNKSR3	.	CNKSR3:NM_173515:exon2:c.G190C:p.E64Q	.	.	6q25.2	.	.	.	.	.	.	NA	PASS	-10	.	.	0.957	0.86	0	1	1.73	.	.	0.642	6.396	29.6	0.998	0.996	-0.897	0.197	0.626	5.97	0.888	20.432	Sterile_alpha_motif_domain\x3bSterile_alpha_motif,_type_1\x3bSterile_alpha_motif/pointed_domain	8,29	0.776	8	29	0.776
BT474_Palbo_Res1	chr7_111783876_C_T	chr7	111783876	C	T	21	exonic	nonsynonymous_SNV	DOCK4	.	DOCK4:NM_014705:exon33:c.G3478A:p.E1160K	.	.	7q31.1	.	.	.	.	.	.	NA	PASS	-10	.	0.049	1	1	0	1	2.465	0.44	-3.15	0.916	5.737	26.9	0.999	0.982	-0.182	0.426	0.706	4.77	0.935	18.316	.	13,8	0.389	13	8	0.389
BT474_Palbo_Res1	chr7_123147262_G_A	chr7	123147262	G	A	82	exonic	nonsynonymous_SNV	SLC13A1	.	SLC13A1:NM_022444:exon7:c.C709T:p.R237C,SLC13A1:NM_001324400:exon10:c.C337T:p.R113C	.	.	7q31.32	0.0017	.	.	.	.	.	NA	PASS	-10	0.0008	0.442	0	0	0	1	-1.665	4.08	7.33	0.299	2.268	17.96	0.074	0.068	-0.956	0.003	0.487	5	0.244	9.028	.	5,75	0.931	5	75	0.931
BT474_Palbo_Res1	chr7_149266846_G_A	chr7	149266846	G	A	70	exonic	nonsynonymous_SNV	ZNF783	.	ZNF783:NM_001195220:exon3:c.G448A:p.V150M	.	.	7q36.1	0.0006	.	.	.	.	.	NA	PASS	-10	0.0004	0.003	.	.	0.01	0.998	2.575	3.64	-2.52	0.503	5.465	26.2	0.999	0.847	-1.187	0.04	0.732	3.88	0.953	11.193	Krueppel-associated_box	0,68	0.982	0	68	0.982
BT474_Palbo_Res1	chr7_158192446_C_T	chr7	158192446	C	T	76	exonic	nonsynonymous_SNV	PTPRN2	.	PTPRN2:NM_001308267:exon4:c.G316A:p.G106S,PTPRN2:NM_130842:exon4:c.G379A:p.G127S,PTPRN2:NM_001308268:exon5:c.G499A:p.G167S,PTPRN2:NM_002847:exon5:c.G430A:p.G144S,PTPRN2:NM_130843:exon5:c.G430A:p.G144S	.	0.00199681	7q36.3	0.0006	.	.	.	.	.	NA	PASS	-10	0.0019	0.169	0.007	0.003	.	1	0.345	4.19	-0.15	0.047	1.043	10.9	0.957	0.026	-0.909	0.006	0.554	3.29	-0.022	8.739	RESP18_domain	0,75	0.983	0	75	0.983
BT474_Palbo_Res1	chr12_100088996_C_G	chr12	100088996	C	G	45	exonic	nonsynonymous_SNV	UHRF1BP1L	.	UHRF1BP1L:NM_001006947:exon8:c.G940C:p.D314H,UHRF1BP1L:NM_015054:exon8:c.G940C:p.D314H	.	.	12q23.1	.	.	.	.	.	.	NA	PASS	-10	.	0.001	1	0.999	0	1	2.015	2.28	-6.1	0.973	5.779	27.1	0.995	0.981	-0.584	0.264	0.732	5.24	0.892	18.834	.	12,29	0.75	12	29	0.75
BT474_Palbo_Res1	chr17_40479794_C_G	chr17	40479794	C	G	43	exonic	nonsynonymous_SNV	TNS4	.	TNS4:NM_032865:exon10:c.G1790C:p.G597A	.	.	17q21.2	.	.	.	.	.	.	NA	PASS	-10	.	0.01	1	1	0	1	2.81	-0.06	-5.78	0.831	4.971	25.1	0.998	0.964	0.153	0.498	0.403	4.86	0.926	17.613	Pleckstrin_homology-like_domain\x3bTensin_phosphotyrosine-binding_domain	16,27	0.612	16	27	0.612
BT474_Palbo_Res1	chr19_14159566_C_T	chr19	14159566	C	T	43	exonic	nonsynonymous_SNV	ADGRL1	.	ADGRL1:NM_014921:exon10:c.G1858A:p.D620N,ADGRL1:NM_001008701:exon11:c.G1873A:p.D625N	.	.	19p13.12	.	.	.	.	.	.	NA	PASS	-10	.	0.547	0.172	0.278	0	0.999	1.355	3.19	-1	0.179	4.332	24	0.994	0.963	-1.043	0.027	0.722	4.1	0.071	11.267	Domain_of_unknown_function_DUF3497	18,24	0.571	18	24	0.571
BT474_Palbo_Res1	chr20_63689116_C_T	chr20	63689116	C	T	60	exonic	nonsynonymous_SNV	RTEL1	.	RTEL1:NM_001283010:exon21:c.C1193T:p.A398V,RTEL1:NM_001283009:exon22:c.C1862T:p.A621V,RTEL1:NM_016434:exon22:c.C1862T:p.A621V,RTEL1:NM_032957:exon22:c.C1934T:p.A645V	.	0.000199681	20q13.33	1.896e-05	.	.	.	.	.	NA	PASS	-10	.	0.002	1	0.997	0	1	3.52	-0.27	-3.69	0.878	6.88	33	0.999	0.897	1.056	0.918	0.635	4.76	0.852	14.779	ATP-dependent_helicase,_C-terminal\x3bP-loop_containing_nucleoside_triphosphate_hydrolase	35,24	0.392	35	24	0.392
BT474_Palbo_Res1	chr1_7773509_G_A	chr1	7773509	G	A	29	exonic	nonsynonymous_SNV	VAMP3	.	VAMP3:NM_004781:exon2:c.G70A:p.E24K	.	.	1p36.23	.	.	.	.	.	.	NA	PASS	-10	.	0.001	0.904	0.641	0	1	3.385	1.28	-3.92	0.878	7.345	34	0.999	0.998	-0.355	0.252	0.706	5.5	1.048	19.431	Synaptobrevin	16,13	0.5	16	13	0.5
BT474_Palbo_Res1	chr4_162018_C_A	chr4	162018	C	A	20	exonic	nonsynonymous_SNV	ZNF718	.	ZNF718:NM_001039127:exon4:c.C1333A:p.H445N,ZNF718:NM_001289930:exon4:c.C1237A:p.H413N,ZNF718:NM_001289931:exon4:c.C1237A:p.H413N	.	.	4p16.3	.	.	.	.	.	.	NA	PASS	-10	.	.	0.991	0.996	.	.	3.125	.	.	0.228	0.259	5.286	0.478	0.03	.	.	0.106	1.05	0.446	7.496	Zinc_finger_C2H2-type/integrase_DNA-binding_domain\x3bZinc_finger,_C2H2\x3bZinc_finger,_C2H2-like	10,10	0.506	10	10	0.506
BT474_Palbo_Res1	chr1_74342850_C_G	chr1	74342850	C	G	26	exonic	nonsynonymous_SNV	FPGT-TNNI3K;TNNI3K	.	TNNI3K:NM_015978:exon8:c.C691G:p.Q231E,FPGT-TNNI3K:NM_001112808:exon10:c.C1033G:p.Q345E,FPGT-TNNI3K:NM_001199327:exon10:c.C1033G:p.Q345E	.	.	1p31.1	.	.	.	.	.	.	NA	PASS	-10	.	0.283	0.228	0.083	0	0.993	1.36	-0.09	-0.36	0.524	1.72	14.52	0.986	0.948	-0.886	0.114	0.487	5.24	0.935	19.028	Ankyrin_repeat-containing_domain	18,8	0.292	18	8	0.292
BT474_Palbo_Res1	chr1_173833490_A_G	chr1	173833490	A	G	200	exonic	nonsynonymous_SNV	DARS2	.	DARS2:NM_018122:exon6:c.A607G:p.N203D	.	.	1q25.1	.	.	.	.	.	.	NA	PASS	-10	.	0.135	0.768	0.56	0	1	-0.695	-1.77	-2.67	0.166	2.921	21.9	0.996	0.977	-0.686	0.141	0.732	4.82	1.199	10.88	Aminoacyl-tRNA_synthetase,_class_II\x3bAminoacyl-tRNA_synthetase,_class_II_(D/K/N)	183,13	0.067	183	13	0.067
BT474_Palbo_Res1	chr1_235677601_C_A	chr1	235677601	C	A	25	exonic	stopgain	LYST	.	LYST:NM_000081:exon49:c.G10819T:p.E3607X,LYST:NM_001301365:exon49:c.G10819T:p.E3607X	.	.	1q42.3	.	.	.	.	.	.	NA	PASS	-10	.	.	.	.	0	1	.	.	.	.	16.581	56	0.995	0.981	.	.	0.615	3.83	0.935	12.191	WD40-repeat-containing_domain\x3bWD40/YVTN_repeat-like-containing_domain	17,8	0.368	17	8	0.368
BT474_Palbo_Res1	chr1_247156779_C_G	chr1	247156779	C	G	200	exonic	nonsynonymous_SNV	ZNF124	.	ZNF124:NM_001297568:exon4:c.G843C:p.E281D,ZNF124:NM_003431:exon4:c.G657C:p.E219D	.	.	1q44	.	.	.	.	.	.	NA	PASS	-10	.	0.02	0.965	0.82	.	1	1.92	3.18	-2.54	0.088	3.537	23.1	0.982	0	-1.055	0.065	0.672	-0.229	-0.508	3.827	Zinc_finger_C2H2-type/integrase_DNA-binding_domain\x3bZinc_finger,_C2H2\x3bZinc_finger,_C2H2-like	182,9	0.055	182	9	0.055
BT474_Palbo_Res1	chr2_218828581_GC_G	chr2	218828581	GC	G	36	exonic	frameshift_deletion	PRKAG3	.	PRKAG3:NM_017431:exon5:c.652delG:p.A218Lfs*24	.	.	2q35	.	.	.	.	.	.	NA	PASS	-10	.	.	.	.	.	.	.	.	.	.	.	.	.	.	.	.	.	.	.	.	.	23,11	0.37	23	11	0.37
BT474_Palbo_Res1	chr3_30606885_T_C	chr3	30606885	T	C	38	exonic	startloss	TGFBR2	.	TGFBR2:NM_001024847:exon1:c.T2C:p.M1?,TGFBR2:NM_003242:exon1:c.T2C:p.M1?	.	.	3p24.1	.	.	.	.	.	.	NA	PASS	-10	.	0	0.717	0.599	.	1	.	-2.11	-0.01	0.845	5.095	25.3	0.989	0.365	0.428	0.686	0.733	3.88	0.733	9.229	.	29,9	0.226	29	9	0.226
BT474_Palbo_Res1	chr3_52491938_A_T	chr3	52491938	A	T	143	exonic	nonsynonymous_SNV	NISCH	.	NISCH:NM_007184:exon21:c.A3971T:p.E1324V	.	.	3p21.1	.	.	.	.	.	.	NA	PASS	-10	.	0.001	0.999	0.996	0	1	0.975	2.94	-3.18	0.607	5.378	25.9	0.995	0.958	-1.146	0.059	0.722	5.6	1.14	15.784	.	98,37	0.255	98	37	0.255
BT474_Palbo_Res1	chr3_128620452_C_A	chr3	128620452	C	A	69	exonic	stopgain	RPN1	.	RPN1:NM_002950:exon10:c.G1783T:p.E595X	.	.	3q21.3	.	.	.	.	.	.	NA	PASS	-10	.	.	.	.	0	1	.	.	.	.	14.976	48	0.997	0.968	.	.	0.646	5.52	0.892	19.428	.	58,9	0.164	58	9	0.164
BT474_Palbo_Res1	chr3_169793681_G_T	chr3	169793681	G	T	39	exonic	stopgain	LRRC34	.	LRRC34:NM_153353:exon10:c.C1253A:p.S418X,LRRC34:NM_001172779:exon11:c.C1349A:p.S450X	.	.	3q26.2	.	.	.	.	.	.	NA	PASS	-10	.	.	.	.	0.467	1	.	.	.	.	9.576	35	0.978	0.096	.	.	0.651	3.02	0.953	4.572	.	29,9	0.258	29	9	0.258
BT474_Palbo_Res1	chr5_40854330_C_T	chr5	40854330	C	T	116	exonic	nonsynonymous_SNV	CARD6	.	CARD6:NM_032587:exon3:c.C2998T:p.P1000S	.	.	5p13.1	2.825e-05	.	.	.	.	.	NA	PASS	-10	.	1	0.001	0	0.298	1	0	-3.78	0.96	0.074	-1.388	0.003	0.114	0.001	-0.444	0.545	0.707	1.83	0.024	5.33	.	104,9	0.08	104	9	0.08
BT474_Palbo_Res1	chr5_179114025_C_A	chr5	179114025	C	A	114	exonic	nonsynonymous_SNV	ADAMTS2	.	ADAMTS2:NM_014244:exon22:c.G3478T:p.A1160S	.	.	5q35.3	.	.	.	.	.	.	NA	PASS	-10	.	0.081	0.919	0.395	0	1	0.55	0.18	-0.44	0.286	1.608	13.9	0.985	0.916	-0.987	0.117	0.615	4.18	0.852	9.169	.	86,24	0.226	86	24	0.226
BT474_Palbo_Res1	chr6_30647296_G_C	chr6	30647296	G	C	14	exonic	nonsynonymous_SNV	C6orf136	.	C6orf136:NM_001109938:exon1:c.G65C:p.R22P,C6orf136:NM_001161376:exon1:c.G65C:p.R22P,C6orf136:NM_145029:exon1:c.G65C:p.R22P	.	.	6p21.33	.	.	.	.	.	.	NA	PASS	-10	.	0.279	1	0.999	0.876	1	0.695	.	-0.26	0.754	3.951	23.6	0.795	0.435	-0.88	0.183	0.442	4.09	1.043	10.618	.	8,6	0.357	8	6	0.357
BT474_Palbo_Res1	chr6_30647301_C_A	chr6	30647301	C	A	15	exonic	nonsynonymous_SNV	C6orf136	.	C6orf136:NM_001109938:exon1:c.C70A:p.Q24K,C6orf136:NM_001161376:exon1:c.C70A:p.Q24K,C6orf136:NM_145029:exon1:c.C70A:p.Q24K	.	.	6p21.33	.	.	.	.	.	.	NA	PASS	-10	.	0.03	0.996	0.987	0.571	1	0.695	.	-0.15	0.67	3.51	23.1	0.837	0.729	-0.75	0.2	0.442	4.97	0.931	13.67	.	8,6	0.356	8	6	0.356
BT474_Palbo_Res1	chr7_27110570_A_C	chr7	27110570	A	C	50	exonic	nonsynonymous_SNV	HOXA3	.	HOXA3:NM_030661:exon2:c.T71G:p.F24C,HOXA3:NM_153631:exon3:c.T71G:p.F24C	.	.	7p15.2	.	.	.	.	.	.	NA	PASS	-10	.	0.001	0.999	0.887	0	1	2.54	0.82	-5.29	0.896	3.729	23.3	0.992	0.998	-0.388	0.294	0.49	5.41	1.199	15.445	.	40,9	0.137	40	9	0.137
BT474_Palbo_Res1	chr9_126615452_G_A	chr9	126615452	G	A	93	exonic	nonsynonymous_SNV	LMX1B	.	LMX1B:NM_001174146:exon2:c.G209A:p.R70Q,LMX1B:NM_001174147:exon2:c.G209A:p.R70Q,LMX1B:NM_002316:exon2:c.G209A:p.R70Q	.	.	9q33.3	.	.	.	.	.	.	NA	PASS	-10	.	0.099	1	0.999	0	1	1.945	-2.26	-2.17	0.784	6.313	29.2	0.999	0.859	0.617	0.752	0.598	4.71	1.047	16.221	Zinc_finger,_LIM-type	78,14	0.158	78	14	0.158
BT474_Palbo_Res1	chr9_132814700_G_A	chr9	132814700	G	A	91	exonic	nonsynonymous_SNV	AK8	.	AK8:NM_001317958:exon10:c.C305T:p.A102V,AK8:NM_152572:exon10:c.C917T:p.A306V,AK8:NM_001317959:exon12:c.C401T:p.A134V	.	.	9q34.13	.	.	.	.	.	.	NA	PASS	-10	.	0.219	0.368	0.199	0.006	0.929	2.455	-1.13	-1.93	0.186	3.645	23.2	0.995	0.822	-0.281	0.444	0.554	4.35	0.953	15.827	P-loop_containing_nucleoside_triphosphate_hydrolase	68,23	0.246	68	23	0.246
BT474_Palbo_Res1	chr10_101526195_G_C	chr10	101526195	G	C	38	exonic	nonsynonymous_SNV	BTRC	.	BTRC:NM_001256856:exon5:c.G661C:p.G221R,BTRC:NM_003939:exon5:c.G631C:p.G211R,BTRC:NM_033637:exon6:c.G739C:p.G247R	.	.	10q24.32	.	.	.	.	.	.	NA	PASS	-10	.	0.064	0.937	0.51	0	1	2.71	1.83	-5.58	0.499	3.386	23	0.998	0.946	-0.845	0.126	0.706	5.33	1.048	19.03	F-box_domain	26,11	0.274	26	11	0.274
BT474_Palbo_Res1	chr11_17531276_G_A	chr11	17531276	G	A	100	exonic	nonsynonymous_SNV	USH1C	.	USH1C:NM_001297764:exon4:c.C265T:p.R89C,USH1C:NM_005709:exon4:c.C265T:p.R89C,USH1C:NM_153676:exon4:c.C265T:p.R89C	.	.	11p15.1	1.891e-05	.	.	.	.	.	NA	PASS	-10	.	0.003	1	0.99	0	1	1.57	1.59	-3.4	0.766	7.434	34	0.999	0.955	-0.913	0.148	0.549	4.76	1.048	12.133	PDZ_domain	84,12	0.12	84	12	0.12
BT474_Palbo_Res1	chr11_17642229_G_C	chr11	17642229	G	C	76	exonic	nonsynonymous_SNV	OTOG	.	OTOG:NM_001277269:exon52:c.G8434C:p.E2812Q,OTOG:NM_001292063:exon53:c.G8398C:p.E2800Q	.	.	11p15.1	.	.	.	.	.	.	NA	PASS	-10	.	0.007	.	.	0	1	1.15	2.21	-2.29	0.373	4.329	24	0.997	0.991	-1.147	0.064	0.554	4.98	0.998	18.246	Cystine_knot,_C-terminal	68,8	0.113	68	8	0.113
BT474_Palbo_Res1	chr11_40115844_AG_A	chr11	40115844	AG	A	103	exonic	stopgain	LRRC4C	.	LRRC4C:NM_020929:exon5:c.448delC:p.L150*,LRRC4C:NM_001258419:exon7:c.448delC:p.L150*	.	.	11p12	.	.	.	.	.	.	NA	PASS	-10	.	.	.	.	.	.	.	.	.	.	.	.	.	.	.	.	.	.	.	.	.	92,8	0.083	92	8	0.083
BT474_Palbo_Res1	chr11_44909781_C_T	chr11	44909781	C	T	24	exonic	nonsynonymous_SNV	TSPAN18	.	TSPAN18:NM_130783:exon4:c.C140T:p.A47V	.	.	11p11.2	.	.	.	.	.	.	NA	PASS	-10	.	0.205	0.077	0.084	0	0.996	1.2	-1.25	-1.28	0.324	3.735	23.3	0.998	0.958	-0.626	0.309	0.707	4.08	0.848	12.76	.	18,6	0.238	18	6	0.238
BT474_Palbo_Res1	chr11_73309636_C_T	chr11	73309636	C	T	504	exonic	nonsynonymous_SNV	ARHGEF17	.	ARHGEF17:NM_014786:exon1:c.C998T:p.P333L	.	.	11q13.4	.	.	.	.	.	.	NA	PASS	-10	.	0.001	0.9	0.433	0.001	0.996	0.695	0.46	-1.09	0.485	4.768	24.7	0.998	0.298	-0.951	0.11	0.658	4.02	0.851	9.808	.	461,31	0.063	461	31	0.063
BT474_Palbo_Res1	chr15_82344920_ATAGCCTCTCCTCCTGTTCACATAGCCTCTCCTCCTGTTCACGTAGCCTCTCCTCCTGTTCACACAGCCTCTCCTCCTGTTCACATAGCCTCTCCTCCTGTTCACGTAGCCTCTCCTCCTGTTCACG_A	chr15	82344920	ATAGCCTCTCCTCCTGTTCACATAGCCTCTCCTCCTGTTCACGTAGCCTCTCCTCCTGTTCACACAGCCTCTCCTCCTGTTCACATAGCCTCTCCTCCTGTTCACGTAGCCTCTCCTCCTGTTCACG	A	18	exonic	nonframeshift_deletion	GOLGA6L10	.	GOLGA6L10:NM_001164465:exon6:c.814_939del:p.R272_L313del,GOLGA6L10:NM_001322400:exon6:c.814_939del:p.H272_L313del	.	.	15q25.2	.	.	.	.	.	.	NA	PASS	-10	.	.	.	.	.	.	.	.	.	.	.	.	.	.	.	.	.	.	.	.	.	8,10	0.508	8	10	0.508
BT474_Palbo_Res1	chr16_734831_G_C	chr16	734831	G	C	92	exonic	nonsynonymous_SNV	CIAO3	.	NARFL:NM_022493:exon5:c.C480G:p.F160L,NARFL:NM_001304799:exon6:c.C174G:p.F58L	.	.	16p13.3	.	.	.	.	.	.	NA	PASS	-10	.	0.561	0.008	0.04	0	1	0.305	1.23	-2.86	0.882	2.641	20.4	0.975	0.918	-0.971	0.06	0.722	1.3	0.135	9.745	Iron_hydrogenase\x3bIron_hydrogenase,_large_subunit,_C-terminal	76,13	0.157	76	13	0.157
BT474_Palbo_Res1	chr16_3224535_G_A	chr16	3224535	G	A	29	exonic	nonsynonymous_SNV	ZNF200	.	ZNF200:NM_001145446:exon5:c.C542T:p.S181L,ZNF200:NM_001145447:exon5:c.C542T:p.S181L,ZNF200:NM_001145448:exon5:c.C542T:p.S181L,ZNF200:NM_003454:exon5:c.C545T:p.S182L,ZNF200:NM_198087:exon5:c.C542T:p.S181L,ZNF200:NM_198088:exon5:c.C545T:p.S182L	ID\x3dCOSM2918900\x3bOCCURENCE\x3d1(urinary_tract)	.	16p13.3	.	.	.	.	.	.	NA	PASS	-10	.	0.428	0.004	0.011	0.67	1	1.7	3.32	-0.56	0.083	-0.249	0.864	0.956	0.001	-0.961	0.021	0.707	1.14	-0.529	4.636	.	23,6	0.222	23	6	0.222
BT474_Palbo_Res1	chr16_11761483_C_T	chr16	11761483	C	T	39	exonic	nonsynonymous_SNV	ZC3H7A	.	ZC3H7A:NM_014153:exon19:c.G2242A:p.V748M	.	.	16p13.13	.	.	.	.	.	.	NA	PASS	-10	.	0.002	0.998	0.924	0	1	1.7	2.35	-2.44	0.58	6.59	31	0.999	0.992	-1.096	0.102	0.707	5.66	0.935	18.744	.	31,8	0.226	31	8	0.226
BT474_Palbo_Res1	chr16_30090993_C_T	chr16	30090993	C	T	68	splicing	.	TBX6	NM_004608:exon3:c.119-1G>A	.	.	.	16p11.2	.	.	.	.	.	.	NA	PASS	-10	.	.	.	.	.	1	.	.	.	.	3.3	22.9	0.976	0.934	.	.	0.167	5.34	0.852	17.808	.	57,8	0.132	57	8	0.132
BT474_Palbo_Res1	chr16_70269724_C_T	chr16	70269724	C	T	76	exonic	nonsynonymous_SNV	AARS1	.	AARS:NM_001605:exon7:c.G856A:p.E286K	.	.	16q22.1	.	.	.	.	.	.	NA	PASS	-10	.	0.007	0.311	0.482	0.016	1	1.72	-0.61	-3.01	0.155	5.94	27.6	0.999	0.969	-0.273	0.408	0.672	5.67	0.935	17.264	Alanine-tRNA_ligase,_class_IIc,_anti-codon-binding_domain\x3bAlanyl-tRNA_synthetase,_class_IIc,_N-terminal\x3bAlanyl-tRNA_synthetase,_class_IIc,_core_domain	63,9	0.125	63	9	0.125
BT474_Palbo_Res1	chr17_7674229_C_T	chr17	7674229	C	T	207	exonic	nonsynonymous_SNV	TP53	.	TP53:NM_001126115:exon3:c.G338A:p.G113D,TP53:NM_001126116:exon3:c.G338A:p.G113D,TP53:NM_001126117:exon3:c.G338A:p.G113D,TP53:NM_001276697:exon3:c.G257A:p.G86D,TP53:NM_001276698:exon3:c.G257A:p.G86D,TP53:NM_001276699:exon3:c.G257A:p.G86D,TP53:NM_001126118:exon6:c.G617A:p.G206D,TP53:NM_000546:exon7:c.G734A:p.G245D,TP53:NM_001126112:exon7:c.G734A:p.G245D,TP53:NM_001126113:exon7:c.G734A:p.G245D,TP53:…	ID\x3dCOSM3388189,COSM43606,COSM179806,COSM179807,COSM1640832,COSM179805\x3bOCCURENCE\x3d7(upper_aerodigestive_tract),1(bone),1(vulva),17(oesophagus),4(stomach),3(central_nervous_system),11(haematopoietic_and_lymphoid_tissue),7(lung),11(ovary),2(urinary_tract),4(pancreas),5(liver),3(prostate),27(large_intestine),13(breast),2(skin)	.	17p13.1	.	Likely_pathogenic,Pathogenic|Pathogenic|Pathogenic	not_provided,Li-Fraumeni_syndrome_1|Hereditary_cancer-predisposing_syndrome|Li-Fraumeni_syndrome	RCV000255018.1,RCV000013149.23|RCV000164465.1|RCV000206683.1	MedGen,MedGen:OMIM|MedGen:SNOMED_CT|MedGen:Orphanet:SNOMED_CT	CN221809,C1835398:151623|C0027672:699346009|C0085390:ORPHA524:428850001	NA	PASS	-10	.	0	1	1	0	1	3.255	-7.62	-6.11	0.986	6.895	33	0.999	0.991	0.903	0.995	0.722	4.62	0.848	15.362	p53,_DNA-binding_domain\x3bp53-like_transcription_factor,_DNA-binding\x3bp53/RUNT-type_transcription_factor,_DNA-binding_domain	197,7	0.034	197	7	0.034
BT474_Palbo_Res1	chr17_17794138_A_G	chr17	17794138	A	G	109	exonic	nonsynonymous_SNV	RAI1	.	RAI1:NM_030665:exon3:c.A1190G:p.N397S	.	.	17p11.2	.	.	.	.	.	.	NA	PASS	-10	.	0.17	0.615	0.219	0	0.666	1.04	1.27	-1.16	0.203	2.523	19.61	0.996	0.988	-1.028	0.062	0.707	5.55	1.199	15.682	.	85,21	0.2	85	21	0.2
BT474_Palbo_Res1	chr17_69106102_C_G	chr17	69106102	C	G	101	exonic	nonsynonymous_SNV	ABCA6	.	ABCA6:NM_080284:exon19:c.G2499C:p.W833C	.	.	17q24.3	.	.	.	.	.	.	NA	PASS	-10	.	0	1	0.999	0	1	2.7	-2.05	-12.47	0.861	6.263	29	0.993	0.977	0.717	0.775	0.707	4.74	0.935	16.801	.	92,8	0.091	92	8	0.091
BT474_Palbo_Res1	chr18_25227328_G_A	chr18	25227328	G	A	181	exonic	nonsynonymous_SNV	ZNF521	.	ZNF521:NM_015461:exon4:c.C590T:p.T197M	.	.	18q11.2	.	.	.	.	.	.	NA	PASS	-10	.	0.008	0.997	0.932	0	1	2.635	1.74	-2.98	0.466	4.359	24.1	0.863	0.974	-0.597	0.179	0.722	5.98	1.048	15.873	Zinc_finger_C2H2-type/integrase_DNA-binding_domain\x3bZinc_finger,_C2H2	134,45	0.233	134	45	0.233
BT474_Palbo_Res1	chr18_56696314_C_T	chr18	56696314	C	T	65	exonic	nonsynonymous_SNV	WDR7	.	WDR7:NM_015285:exon12:c.C1430T:p.S477L,WDR7:NM_052834:exon12:c.C1430T:p.S477L	.	.	18q21.31	.	.	.	.	.	.	NA	PASS	-10	.	0.085	0.911	0.621	0	1	1.555	3.03	-3.45	0.888	5.447	26.1	0.999	0.982	-1.084	0.037	0.638	5.73	0.935	19.855	Quinonprotein_alcohol_dehydrogenase-like_superfamily\x3bWD40-repeat-containing_domain\x3bWD40/YVTN_repeat-like-containing_domain	50,15	0.244	50	15	0.244
BT474_Palbo_Res1	chr19_30548471_G_A	chr19	30548471	G	A	235	exonic	nonsynonymous_SNV	ZNF536	.	ZNF536:NM_014717:exon4:c.G2852A:p.G951E	.	.	19q12	.	.	.	.	.	.	NA	PASS	-10	.	0.026	0.181	0.102	0.138	1	0.695	2.99	-1.45	0.302	0.897	10.06	0.875	0.876	-1.002	0.022	0.487	4.38	0.043	15.565	.	201,26	0.118	201	26	0.118
BT474_Palbo_Res1	chr20_2483343_C_G	chr20	2483343	C	G	88	exonic	nonsynonymous_SNV	ZNF343	.	ZNF343:NM_001282498:exon4:c.G1348C:p.E450Q,ZNF343:NM_001282496:exon6:c.G1618C:p.E540Q,ZNF343:NM_001321800:exon6:c.G1618C:p.E540Q,ZNF343:NM_001321805:exon6:c.G1615C:p.E539Q,ZNF343:NM_024325:exon6:c.G1618C:p.E540Q,ZNF343:NM_001282495:exon7:c.G1618C:p.E540Q,ZNF343:NM_001282497:exon7:c.G1741C:p.E581Q,ZNF343:NM_001321801:exon7:c.G1741C:p.E581Q,ZNF343:NM_001321802:exon7:c.G1738C:p.E580Q,ZNF343:NM_00132…	.	.	20p13	.	.	.	.	.	.	NA	PASS	-10	.	1	0.002	0.002	.	1	-0.24	0.87	1.92	0.068	-1.447	0.003	0.806	0.022	-0.991	0.036	0.707	-1.28	0.581	7.213	Zinc_finger_C2H2-type/integrase_DNA-binding_domain\x3bZinc_finger,_C2H2\x3bZinc_finger,_C2H2-like	72,12	0.161	72	12	0.161
BT474_Palbo_Res1	chr21_42653819_G_A	chr21	42653819	G	A	17	exonic	nonsynonymous_SNV	PDE9A	.	PDE9A:NM_001001567:exon1:c.G5A:p.G2E,PDE9A:NM_001001569:exon1:c.G5A:p.G2E,PDE9A:NM_001001570:exon1:c.G5A:p.G2E,PDE9A:NM_001001574:exon1:c.G5A:p.G2E,PDE9A:NM_001001578:exon1:c.G5A:p.G2E,PDE9A:NM_001001583:exon1:c.G5A:p.G2E,PDE9A:NM_002606:exon1:c.G5A:p.G2E	.	.	21q22.3	.	.	.	.	.	.	NA	PASS	-10	.	0	1	1	0.59	1	1.7	-1.48	-0.14	0.529	5.561	26.4	0.995	0.761	0.394	0.732	0.726	3.67	0.819	12.315	.	11,6	0.385	11	6	0.385
BT474_Palbo_Res1	chr22_30935133_C_T	chr22	30935133	C	T	122	exonic	nonsynonymous_SNV	MORC2	.	MORC2:NM_001303256:exon19:c.G1841A:p.R614Q,MORC2:NM_001303257:exon19:c.G1841A:p.R614Q,MORC2:NM_014941:exon20:c.G1655A:p.R552Q	.	.	22q12.2	.	.	.	.	.	.	NA	PASS	-10	.	0.265	1	0.992	0	1	1.295	2.61	-0.34	0.643	4.59	24.4	0.999	0.995	-1.139	0.07	0.707	5.76	0.935	18.14	.	105,13	0.14	105	13	0.14
BT474_Palbo_Res1	chr22_41658331_G_A	chr22	41658331	G	A	59	exonic	nonsynonymous_SNV	XRCC6	.	XRCC6:NM_001288978:exon10:c.G1351A:p.E451K,XRCC6:NM_001288976:exon11:c.G1501A:p.E501K,XRCC6:NM_001288977:exon11:c.G1378A:p.E460K,XRCC6:NM_001469:exon11:c.G1501A:p.E501K	.	.	22q13.2	.	.	.	.	.	.	NA	PASS	-10	.	0.004	0.996	0.968	0	1	2.295	0.86	-3.26	0.78	7.032	33	0.999	0.995	-0.667	0.291	0.707	5.29	0.9	18.934	Ku70/Ku80_C-terminal_arm\x3bSPOC_like_C-terminal_domain	44,12	0.237	44	12	0.237
BT474_Palbo_Res1	chrX_2266788_G_C	chrX	2266788	G	C	155	exonic	nonsynonymous_SNV	DHRSX	.	DHRSX:NM_145177:exon5:c.C548G:p.S183C	.	.	Xp22.33	.	.	.	.	.	.	NA	PASS	-10	.	0	1	1	0	0.621	3.94	-4.17	-4.49	0.841	3.441	23	0.98	0.969	1.126	0.952	.	2.11	0.615	12.246	NAD(P)-binding_domain	140,10	0.088	140	10	0.088
BT474_Palbo_Res1	chrX_49217788_G_A	chrX	49217788	G	A	75	exonic	nonsynonymous_SNV	CACNA1F	.	CACNA1F:NM_001256789:exon26:c.C3056T:p.T1019M,CACNA1F:NM_001256790:exon26:c.C2894T:p.T965M,CACNA1F:NM_005183:exon26:c.C3089T:p.T1030M	.	.	Xp11.23	1.317e-05	.	.	.	.	.	NA	PASS	-10	.	0	1	0.998	0	1	3.075	-4.97	-4.47	0.594	6.588	31	0.999	0.987	1.088	0.968	.	4.85	1.048	14.612	Ion_transport_domain\x3bVoltage-dependent_channel,_four_helix_bundle_domain	68,6	0.103	68	6	0.103
BT474_Palbo_Res2	chr1_44545513_G_C	chr1	44545513	G	C	39	ncRNA_exonic	.	MIR5584	.	.	.	.	1p34.1	.	.	.	.	.	.	NA	PASS	-10	.	.	.	.	.	.	.	.	.	.	.	.	.	.	.	.	.	.	.	.	.	8,31	0.758	8	31	0.758
BT474_Palbo_Res2	chr1_51933435_G_C	chr1	51933435	G	C	46	exonic	nonsynonymous_SNV	RAB3B	.	RAB3B:NM_002867:exon4:c.C355G:p.Q119E	.	0.000199681	1p32.3	9.488e-06	.	.	.	.	.	NA	PASS	-10	.	0.158	0.957	0.532	0	1	-1.47	-0.81	-1.59	0.71	1.535	13.5	0.993	0.99	-0.697	0.135	0.732	5.15	1.048	18.404	P-loop_containing_nucleoside_triphosphate_hydrolase\x3bSmall_GTP-binding_protein_domain	10,35	0.778	10	35	0.778
BT474_Palbo_Res2	chr1_148126839_C_G	chr1	148126839	C	G	40	exonic	nonsynonymous_SNV	NBPF11	.	NBPF11:NM_001101663:exon3:c.G165C:p.Q55H,NBPF11:NM_183372:exon5:c.G327C:p.Q109H	.	.	1q21.2	.	.	.	.	.	.	NA	PASS	-10	.	.	.	.	.	.	.	.	.	.	.	.	.	.	.	.	.	.	.	.	.	18,21	0.521	18	21	0.521
BT474_Palbo_Res2	chr1_151048064_G_A	chr1	151048064	G	A	139	exonic	nonsynonymous_SNV	C1orf56	.	C1orf56:NM_017860:exon1:c.G217A:p.D73N	.	.	1q21.3	.	.	.	.	.	.	NA	PASS	-10	.	0.431	0.002	0.002	0.064	1	0	.	0.46	0.036	0.008	2.66	0.914	0.012	-1.053	0.019	0.267	-3.08	-0.161	9.979	.	89,45	0.358	89	45	0.358
BT474_Palbo_Res2	chr2_74047038_C_G	chr2	74047038	C	G	59	exonic	nonsynonymous_SNV	TET3	.	TET3:NM_001287491:exon3:c.C1121G:p.S374C	.	.	2p13.1	.	.	.	.	.	.	NA	PASS	-10	.	0.004	0.993	0.628	.	0.989	0.345	1.77	-1.72	0.215	4.176	23.8	0.988	0.672	-1.05	0.06	0.632	5.84	0.935	13.82	.	26,33	0.578	26	33	0.578
BT474_Palbo_Res2	chr3_50647902_G_T	chr3	50647902	G	T	41	exonic	nonsynonymous_SNV	MAPKAPK3	.	MAPKAPK3:NM_001243925:exon11:c.G1005T:p.M335I,MAPKAPK3:NM_004635:exon11:c.G1005T:p.M335I,MAPKAPK3:NM_001243926:exon13:c.G1005T:p.M335I	.	.	3p21.2	.	.	.	.	.	.	NA	PASS	-10	.	0.056	0.816	0.521	0	1	2.57	0.83	-3.61	0.776	3.966	23.6	0.998	0.993	-0.726	0.233	0.732	5.88	1.048	19.829	MAP_kinase_activated_protein_kinase,_C-terminal_domain\x3bProtein_kinase-like_domain	26,14	0.364	26	14	0.364
BT474_Palbo_Res2	chr3_124395336_G_A	chr3	124395336	G	A	81	exonic	nonsynonymous_SNV	KALRN	.	KALRN:NM_001024660:exon12:c.G2158A:p.E720K,KALRN:NM_001322988:exon12:c.G2158A:p.E720K,KALRN:NM_001322989:exon12:c.G2158A:p.E720K,KALRN:NM_001322992:exon12:c.G2158A:p.E720K,KALRN:NM_003947:exon12:c.G2158A:p.E720K	.	.	3q21.2	.	.	.	.	.	.	NA	PASS	-10	.	0.163	0.458	0.043	0.094	0.603	0	0.74	-1.08	0.555	3.419	23	0.998	0.856	-1.034	0.076	0.713	4.96	1.048	11.064	.	36,45	0.563	36	45	0.563
BT474_Palbo_Res2	chr3_124657461_G_C	chr3	124657461	G	C	54	exonic	nonsynonymous_SNV	KALRN	.	KALRN:NM_001322998:exon6:c.G686C:p.R229T,KALRN:NM_001322999:exon6:c.G683C:p.R228T,KALRN:NM_001323000:exon6:c.G686C:p.R229T,KALRN:NM_001323001:exon6:c.G683C:p.R228T,KALRN:NM_001322993:exon7:c.G782C:p.R261T,KALRN:NM_001322994:exon7:c.G779C:p.R260T,KALRN:NM_001322995:exon7:c.G782C:p.R261T,KALRN:NM_001322996:exon7:c.G782C:p.R261T,KALRN:NM_001322997:exon7:c.G779C:p.R260T,KALRN:NM_007064:exon7:c.G782C:…	.	.	3q21.2	.	.	.	.	.	.	NA	PASS	-10	.	0.55	0.997	0.945	0	0.956	-0.105	-0.03	-2.04	0.309	2.643	20.5	0.908	0.927	-0.684	0.203	0.638	5.08	0.953	14.301	Dbl_homology_(DH)_domain	24,29	0.511	24	29	0.511
BT474_Palbo_Res2	chr3_179199158_G_C	chr3	179199158	G	C	18	exonic	nonsynonymous_SNV	PIK3CA	.	PIK3CA:NM_006218:exon2:c.G333C:p.K111N	ID\x3dCOSM582516,COSM12580\x3bOCCURENCE\x3d1(lung),1(upper_aerodigestive_tract),6(breast)	.	3q26.32	.	.	.	.	.	.	NA	PASS	-10	.	0.051	0.999	0.971	0	1	2.42	0.89	-3.69	0.372	5.465	26.2	0.998	0.955	0.15	0.582	0.732	4.63	1.048	10.977	Ubiquitin-related_domain	7,11	0.611	7	11	0.611
BT474_Palbo_Res2	chr4_38829308_C_G	chr4	38829308	C	G	32	exonic	nonsynonymous_SNV	TLR6	.	TLR6:NM_006068:exon2:c.G166C:p.V56L	.	.	4p14	.	.	.	.	.	.	NA	PASS	-10	.	0.209	0.008	0.004	0.596	1	1.14	4.27	-1.15	0.218	0.652	8.512	0.936	0.095	-0.912	0.009	0.776	0.713	0.065	4.264	.	12,19	0.538	12	19	0.538
BT474_Palbo_Res2	chr7_5528630_G_C	chr7	5528630	G	C	200	exonic	nonsynonymous_SNV	ACTB	.	ACTB:NM_001101:exon4:c.C453G:p.I151M	.	.	7p22.1	.	.	.	.	.	.	NA	PASS	-10	.	.	0.001	0.167	0.005	0.817	2.5	-3.53	-2.14	0.807	1.882	15.48	0.933	0.958	0.135	0.894	0.752	-5.72	-0.216	15.297	.	95102	0.535	95	102	0.535
BT474_Palbo_Res2	chr7_123147262_G_A	chr7	123147262	G	A	66	exonic	nonsynonymous_SNV	SLC13A1	.	SLC13A1:NM_022444:exon7:c.C709T:p.R237C,SLC13A1:NM_001324400:exon10:c.C337T:p.R113C	.	.	7q31.32	0.0017	.	.	.	.	.	NA	PASS	-10	0.0008	0.442	0	0	0	1	-1.665	4.08	7.33	0.299	2.268	17.96	0.074	0.068	-0.956	0.003	0.487	5	0.244	9.028	.	0,65	0.98	0	65	0.98
BT474_Palbo_Res2	chr7_149266846_G_A	chr7	149266846	G	A	68	exonic	nonsynonymous_SNV	ZNF783	.	ZNF783:NM_001195220:exon3:c.G448A:p.V150M	.	.	7q36.1	0.0006	.	.	.	.	.	NA	PASS	-10	0.0004	0.003	.	.	0.01	0.998	2.575	3.64	-2.52	0.503	5.465	26.2	0.999	0.847	-1.187	0.04	0.732	3.88	0.953	11.193	Krueppel-associated_box	0,65	0.981	0	65	0.981
BT474_Palbo_Res2	chr12_100088996_C_G	chr12	100088996	C	G	41	exonic	nonsynonymous_SNV	UHRF1BP1L	.	UHRF1BP1L:NM_001006947:exon8:c.G940C:p.D314H,UHRF1BP1L:NM_015054:exon8:c.G940C:p.D314H	.	.	12q23.1	.	.	.	.	.	.	NA	PASS	-10	.	0.001	1	0.999	0	1	2.015	2.28	-6.1	0.973	5.779	27.1	0.995	0.981	-0.584	0.264	0.732	5.24	0.892	18.834	.	17,21	0.586	17	21	0.586
BT474_Palbo_Res2	chr16_89885936_C_T	chr16	89885936	C	T	64	exonic	nonsynonymous_SNV	TCF25	.	TCF25:NM_014972:exon4:c.C518T:p.S173F	.	.	16q24.3	.	.	.	.	.	.	NA	PASS	-10	.	0.008	0.918	0.553	0.171	1	1.545	.	-3.2	0.263	2.823	21.5	0.997	0.303	-0.697	0.208	0.732	4.19	0.935	12.32	.	24,40	0.624	24	40	0.624
BT474_Palbo_Res2	chr17_9022441_G_A	chr17	9022441	G	A	33	exonic	nonsynonymous_SNV	NTN1	.	NTN1:NM_004822:exon2:c.G68A:p.R23H	.	.	17p13.1	.	.	.	.	.	.	NA	PASS	-10	.	0.555	0.923	0.198	0.004	0.806	1.735	1.39	-0.3	0.371	2.53	19.66	0.997	0.85	-0.837	0.078	0.455	3.65	0.87	15.514	.	10,23	0.665	10	23	0.665
BT474_Palbo_Res2	chr17_42338759_G_C	chr17	42338759	G	C	17	exonic	nonsynonymous_SNV	STAT3	.	STAT3:NM_003150:exon6:c.C522G:p.F174L,STAT3:NM_139276:exon6:c.C522G:p.F174L,STAT3:NM_213662:exon6:c.C522G:p.F174L	.	.	17q21.2	.	.	.	.	.	.	NA	PASS	-10	.	0.024	0.903	0.879	0	1	1.43	0.18	-4.12	0.896	6.396	29.6	0.999	0.916	-0.697	0.259	0.732	4.35	0.953	10.703	STAT_transcription_factor,_all-alpha\x3bSTAT_transcription_factor,_coiled_coil	7,9	0.584	7	9	0.584
BT474_Palbo_Res2	chr20_3203326_C_T	chr20	3203326	C	T	20	exonic	nonsynonymous_SNV	DDRGK1	.	DDRGK1:NM_023935:exon2:c.G182A:p.G61E	.	.	20p13	.	.	.	.	.	.	NA	PASS	-10	.	1	0.004	0.007	0.001	0.789	0	1.01	0.35	0.082	-0.493	0.229	0.882	0.088	-0.981	0.037	0.726	1.52	0.069	4.542	.	11,8	0.437	11	8	0.437
BT474_Palbo_Res2	chr1_7773509_G_A	chr1	7773509	G	A	20	exonic	nonsynonymous_SNV	VAMP3	.	VAMP3:NM_004781:exon2:c.G70A:p.E24K	.	.	1p36.23	.	.	.	.	.	.	NA	PASS	-10	.	0.001	0.904	0.641	0	1	3.385	1.28	-3.92	0.878	7.345	34	0.999	0.998	-0.355	0.252	0.706	5.5	1.048	19.431	Synaptobrevin	8,12	0.6	8	12	0.6
BT474_Palbo_Res2	chr1_46279040_C_CCTACTTAAAATAATGGAAAGTTCCTAGACCCATAGCAGGGACAGAGAGTAGCA	chr1	46279040	C	CCTACTTAAAATAATGGAAAGTTCCTAGACCCATAGCAGGGACAGAGAGTAGCA	123	exonic	stopgain	LRRC41	.	LRRC41:NM_006369:exon10:c.2263_2264insTGCTACTCTCTGTCCCTGCTATGGGTCTAGGAACTTTCCATTATTTTAAGTAG:p.R755Lfs*18	.	.	1p34.1	.	.	.	.	.	.	NA	PASS	-10	.	.	.	.	.	.	.	.	.	.	.	.	.	.	.	.	.	.	.	.	.	116,7	0.068	116	7	0.068
BT474_Palbo_Res2	chr1_74342850_C_G	chr1	74342850	C	G	16	exonic	nonsynonymous_SNV	FPGT-TNNI3K;TNNI3K	.	TNNI3K:NM_015978:exon8:c.C691G:p.Q231E,FPGT-TNNI3K:NM_001112808:exon10:c.C1033G:p.Q345E,FPGT-TNNI3K:NM_001199327:exon10:c.C1033G:p.Q345E	.	.	1p31.1	.	.	.	.	.	.	NA	PASS	-10	.	0.283	0.228	0.083	0	0.993	1.36	-0.09	-0.36	0.524	1.72	14.52	0.986	0.948	-0.886	0.114	0.487	5.24	0.935	19.028	Ankyrin_repeat-containing_domain	9,7	0.467	9	7	0.467
BT474_Palbo_Res2	chr1_173833490_A_G	chr1	173833490	A	G	202	exonic	nonsynonymous_SNV	DARS2	.	DARS2:NM_018122:exon6:c.A607G:p.N203D	.	.	1q25.1	.	.	.	.	.	.	NA	PASS	-10	.	0.135	0.768	0.56	0	1	-0.695	-1.77	-2.67	0.166	2.921	21.9	0.996	0.977	-0.686	0.141	0.732	4.82	1.199	10.88	Aminoacyl-tRNA_synthetase,_class_II\x3bAminoacyl-tRNA_synthetase,_class_II_(D/K/N)	177,22	0.116	177	22	0.116
BT474_Palbo_Res2	chr1_247156779_C_G	chr1	247156779	C	G	251	exonic	nonsynonymous_SNV	ZNF124	.	ZNF124:NM_001297568:exon4:c.G843C:p.E281D,ZNF124:NM_003431:exon4:c.G657C:p.E219D	.	.	1q44	.	.	.	.	.	.	NA	PASS	-10	.	0.02	0.965	0.82	.	1	1.92	3.18	-2.54	0.088	3.537	23.1	0.982	0	-1.055	0.065	0.672	-0.229	-0.508	3.827	Zinc_finger_C2H2-type/integrase_DNA-binding_domain\x3bZinc_finger,_C2H2\x3bZinc_finger,_C2H2-like	229,15	0.065	229	15	0.065
BT474_Palbo_Res2	chr2_96816322_C_A	chr2	96816322	C	A	11	exonic	nonsynonymous_SNV	CNNM3	.	CNNM3:NM_017623:exon1:c.C45A:p.F15L,CNNM3:NM_199078:exon1:c.C45A:p.F15L	.	.	2q11.2	.	.	.	.	.	.	NA	PASS	-10	.	0.873	0	0	0.779	1	-0.695	-1.87	0.67	0.173	-0.204	1.076	0.885	0.051	-0.847	0.251	0.442	-0.075	-0.434	1.279	.	5,6	0.545	5	6	0.545
BT474_Palbo_Res2	chr2_167249601_G_C	chr2	167249601	G	C	30	exonic	nonsynonymous_SNV	XIRP2	.	XIRP2:NM_001199144:exon7:c.G7543C:p.E2515Q,XIRP2:NM_152381:exon9:c.G8209C:p.E2737Q	.	.	2q24.3	.	.	.	.	.	.	NA	PASS	-10	.	0.16	0.186	0.077	0.566	1	1.79	4.15	-0.81	0.058	0.412	6.719	0.949	0.396	-0.879	0.018	0.487	4.15	1.048	15.613	.	18,11	0.335	18	11	0.335
BT474_Palbo_Res2	chr2_218828581_GC_G	chr2	218828581	GC	G	28	exonic	frameshift_deletion	PRKAG3	.	PRKAG3:NM_017431:exon5:c.652delG:p.A218Lfs*24	.	.	2q35	.	.	.	.	.	.	NA	PASS	-10	.	.	.	.	.	.	.	.	.	.	.	.	.	.	.	.	.	.	.	.	.	18,10	0.318	18	10	0.318
BT474_Palbo_Res2	chr3_30606885_T_C	chr3	30606885	T	C	33	exonic	startloss	TGFBR2	.	TGFBR2:NM_001024847:exon1:c.T2C:p.M1?,TGFBR2:NM_003242:exon1:c.T2C:p.M1?	.	.	3p24.1	.	.	.	.	.	.	NA	PASS	-10	.	0	0.717	0.599	.	1	.	-2.11	-0.01	0.845	5.095	25.3	0.989	0.365	0.428	0.686	0.733	3.88	0.733	9.229	.	25,8	0.261	25	8	0.261
BT474_Palbo_Res2	chr3_49913226_C_G	chr3	49913226	C	G	104	exonic	nonsynonymous_SNV	MON1A	.	MON1A:NM_001142501:exon2:c.G412C:p.E138Q,MON1A:NM_032355:exon2:c.G412C:p.E138Q	.	.	3p21.31	.	.	.	.	.	.	NA	PASS	-10	.	0.313	1	1	0	1	2.085	.	-0.08	0.698	6.237	28.8	0.997	0.992	-0.253	0.427	0.707	5.16	0.848	19.023	.	81,17	0.177	81	17	0.177
BT474_Palbo_Res2	chr3_52491938_A_T	chr3	52491938	A	T	102	exonic	nonsynonymous_SNV	NISCH	.	NISCH:NM_007184:exon21:c.A3971T:p.E1324V	.	.	3p21.1	.	.	.	.	.	.	NA	PASS	-10	.	0.001	0.999	0.996	0	1	0.975	2.94	-3.18	0.607	5.378	25.9	0.995	0.958	-1.146	0.059	0.722	5.6	1.14	15.784	.	71,29	0.286	71	29	0.286
BT474_Palbo_Res2	chr3_128620452_C_A	chr3	128620452	C	A	69	exonic	stopgain	RPN1	.	RPN1:NM_002950:exon10:c.G1783T:p.E595X	.	.	3q21.3	.	.	.	.	.	.	NA	PASS	-10	.	.	.	.	0	1	.	.	.	.	14.976	48	0.997	0.968	.	.	0.646	5.52	0.892	19.428	.	54,12	0.208	54	12	0.208
BT474_Palbo_Res2	chr3_169793681_G_T	chr3	169793681	G	T	34	exonic	stopgain	LRRC34	.	LRRC34:NM_153353:exon10:c.C1253A:p.S418X,LRRC34:NM_001172779:exon11:c.C1349A:p.S450X	.	.	3q26.2	.	.	.	.	.	.	NA	PASS	-10	.	.	.	.	0.467	1	.	.	.	.	9.576	35	0.978	0.096	.	.	0.651	3.02	0.953	4.572	.	24,9	0.259	24	9	0.259
BT474_Palbo_Res2	chr4_55359450_A_G	chr4	55359450	A	G	21	exonic	nonsynonymous_SNV	SRD5A3	.	SRD5A3:NM_024592:exon2:c.A326G:p.H109R	.	.	4q12	.	.	.	.	.	.	NA	PASS	-10	.	0.439	0	0.001	0.492	1	1.1	2.17	-0.38	0.414	0.149	4.132	0.896	0.223	-1.017	0.059	0.706	1.25	0.237	5.709	.	14,7	0.353	14	7	0.353
BT474_Palbo_Res2	chr4_61733399_A_T	chr4	61733399	A	T	37	exonic	nonsynonymous_SNV	ADGRL3	.	ADGRL3:NM_001322246:exon7:c.A1040T:p.Q347L,ADGRL3:NM_015236:exon7:c.A1040T:p.Q347L,ADGRL3:NM_001322402:exon8:c.A1244T:p.Q415L	.	.	4q13.1	.	.	.	.	.	.	NA	PASS	-10	.	0.378	0.002	0.003	0.004	0.88	-1.61	-2.42	0.77	0.268	0.593	8.109	0.975	0.652	-0.589	0.24	0.66	5.31	1.199	10.577	Olfactomedin-like	28,6	0.178	28	6	0.178
BT474_Palbo_Res2	chr5_146149642_G_A	chr5	146149642	G	A	30	exonic	stopgain	LARS1	.	LARS:NM_001317964:exon14:c.C1345T:p.Q449X,LARS:NM_001317965:exon14:c.C1321T:p.Q441X,LARS:NM_016460:exon14:c.C1402T:p.Q468X,LARS:NM_020117:exon15:c.C1483T:p.Q495X	.	.	5q32	.	.	.	.	.	.	NA	PASS	-10	.	.	.	.	0	1	.	.	.	.	11.828	38	0.998	0.994	.	.	0.707	4.32	1.048	15.15	Aminoacyl-tRNA_synthetase,_class_Ia\x3bValyl/Leucyl/Isoleucyl-tRNA_synthetase,_editing_domain	18,11	0.304	18	11	0.304
BT474_Palbo_Res2	chr5_179114025_C_A	chr5	179114025	C	A	158	exonic	nonsynonymous_SNV	ADAMTS2	.	ADAMTS2:NM_014244:exon22:c.G3478T:p.A1160S	.	.	5q35.3	.	.	.	.	.	.	NA	PASS	-10	.	0.081	0.919	0.395	0	1	0.55	0.18	-0.44	0.286	1.608	13.9	0.985	0.916	-0.987	0.117	0.615	4.18	0.852	9.169	.	122,31	0.214	122	31	0.214
BT474_Palbo_Res2	chr8_27610667_C_CGTATCTTAGCATCCTGTTTGTCTCTCCCAAATCTCTTATAACAACATGGACTTATTTTTCAAA	chr8	27610667	C	CGTATCTTAGCATCCTGTTTGTCTCTCCCAAATCTCTTATAACAACATGGACTTATTTTTCAAA	140	ncRNA_exonic	.	MIR6843	.	.	.	.	8p21.1	.	.	.	.	.	.	NA	PASS	-10	.	.	.	.	.	.	.	.	.	.	.	.	.	.	.	.	.	.	.	.	.	108,32	0.267	108	32	0.267
BT474_Palbo_Res2	chr9_126615452_G_A	chr9	126615452	G	A	77	exonic	nonsynonymous_SNV	LMX1B	.	LMX1B:NM_001174146:exon2:c.G209A:p.R70Q,LMX1B:NM_001174147:exon2:c.G209A:p.R70Q,LMX1B:NM_002316:exon2:c.G209A:p.R70Q	.	.	9q33.3	.	.	.	.	.	.	NA	PASS	-10	.	0.099	1	0.999	0	1	1.945	-2.26	-2.17	0.784	6.313	29.2	0.999	0.859	0.617	0.752	0.598	4.71	1.047	16.221	Zinc_finger,_LIM-type	60,17	0.213	60	17	0.213
BT474_Palbo_Res2	chr9_128276748_G_C	chr9	128276748	G	C	73	exonic	nonsynonymous_SNV	SWI5	.	SWI5:NM_001040011:exon2:c.G419C:p.R140P,SWI5:NM_001318089:exon2:c.G299C:p.R100P,SWI5:NM_001318092:exon2:c.G131C:p.R44P	.	.	9q34.11	.	.	.	.	.	.	NA	PASS	-10	.	0.18	0.158	0.031	0.025	1	0.695	.	-0.13	0.5	4.966	25.1	0.979	0.693	-1.075	0.039	0.442	-0.781	-0.216	0.943	.	62,7	0.124	62	7	0.124
BT474_Palbo_Res2	chr9_132814700_G_A	chr9	132814700	G	A	90	exonic	nonsynonymous_SNV	AK8	.	AK8:NM_001317958:exon10:c.C305T:p.A102V,AK8:NM_152572:exon10:c.C917T:p.A306V,AK8:NM_001317959:exon12:c.C401T:p.A134V	.	.	9q34.13	.	.	.	.	.	.	NA	PASS	-10	.	0.219	0.368	0.199	0.006	0.929	2.455	-1.13	-1.93	0.186	3.645	23.2	0.995	0.822	-0.281	0.444	0.554	4.35	0.953	15.827	P-loop_containing_nucleoside_triphosphate_hydrolase	71,17	0.18	71	17	0.18
BT474_Palbo_Res2	chr9_137009660_AGGCTCAGCTGCTGCCAGGCCCACACACCCCAGCCTGAACGCTGCCCCTGCCCGTGCTCACCAGGAAGTCAAAGGCCAGGCAGCCACCCCCCACCCACCCAGGACTTACCAGGAAGATGAAGGCTGGGTACCCAATGAGGGCGAT_A	chr9	137009660	AGGCTCAGCTGCTGCCAGGCCCACACACCCCAGCCTGAACGCTGCCCCTGCCCGTGCTCACCAGGAAGTCAAAGGCCAGGCAGCCACCCCCCACCCACCCAGGACTTACCAGGAAGATGAAGGCTGGGTACCCAATGAGGGCGAT	A	128	exonic	nonframeshift_deletion	ABCA2	.	ABCA2:NM_001606:exon43:c.6595_6630del:p.I2199_L2210del,ABCA2:NM_212533:exon43:c.6685_6720del:p.I2229_L2240del	.	.	9q34.3	.	.	.	.	.	.	NA	PASS	-10	.	.	.	.	.	.	.	.	.	.	.	.	.	.	.	.	.	.	.	.	.	96,32	0.287	96	32	0.287
BT474_Palbo_Res2	chr10_79921988_C_CTTTCTCTCTGCCCATAATGTGTTCTTGGAAGT	chr10	79921988	C	CTTTCTCTCTGCCCATAATGTGTTCTTGGAAGT	103	ncRNA_exonic	.	BMS1P21;MBL1P	.	.	.	.	10q22.3	.	.	.	.	.	.	NA	PASS	-10	0	.	.	.	.	.	.	.	.	.	.	.	.	.	.	.	.	.	.	.	.	97,6	0.091	97	6	0.091
BT474_Palbo_Res2	chr10_101526195_G_C	chr10	101526195	G	C	29	exonic	nonsynonymous_SNV	BTRC	.	BTRC:NM_001256856:exon5:c.G661C:p.G221R,BTRC:NM_003939:exon5:c.G631C:p.G211R,BTRC:NM_033637:exon6:c.G739C:p.G247R	.	.	10q24.32	.	.	.	.	.	.	NA	PASS	-10	.	0.064	0.937	0.51	0	1	2.71	1.83	-5.58	0.499	3.386	23	0.998	0.946	-0.845	0.126	0.706	5.33	1.048	19.03	F-box_domain	18,11	0.384	18	11	0.384
BT474_Palbo_Res2	chr11_8699367_G_C	chr11	8699367	G	C	64	exonic	nonsynonymous_SNV	DENND2B	.	ST5:NM_139157:exon14:c.C1484G:p.A495G,ST5:NM_213618:exon15:c.C2744G:p.A915G,ST5:NM_005418:exon18:c.C2744G:p.A915G	.	.	11p15.4	.	.	.	.	.	.	NA	PASS	-10	.	0.003	1	0.998	0	1	2.15	2.18	-3.49	0.836	6.811	32	0.998	0.971	-0.921	0.157	0.731	5.82	1.048	20.085	DENN_domain	51,10	0.195	51	10	0.195
BT474_Palbo_Res2	chr11_17531276_G_A	chr11	17531276	G	A	103	exonic	nonsynonymous_SNV	USH1C	.	USH1C:NM_001297764:exon4:c.C265T:p.R89C,USH1C:NM_005709:exon4:c.C265T:p.R89C,USH1C:NM_153676:exon4:c.C265T:p.R89C	.	.	11p15.1	1.891e-05	.	.	.	.	.	NA	PASS	-10	.	0.003	1	0.99	0	1	1.57	1.59	-3.4	0.766	7.434	34	0.999	0.955	-0.913	0.148	0.549	4.76	1.048	12.133	PDZ_domain	94,6	0.081	94	6	0.081
BT474_Palbo_Res2	chr11_17642229_G_C	chr11	17642229	G	C	71	exonic	nonsynonymous_SNV	OTOG	.	OTOG:NM_001277269:exon52:c.G8434C:p.E2812Q,OTOG:NM_001292063:exon53:c.G8398C:p.E2800Q	.	.	11p15.1	.	.	.	.	.	.	NA	PASS	-10	.	0.007	.	.	0	1	1.15	2.21	-2.29	0.373	4.329	24	0.997	0.991	-1.147	0.064	0.554	4.98	0.998	18.246	Cystine_knot,_C-terminal	60,10	0.177	60	10	0.177
BT474_Palbo_Res2	chr11_73309636_C_T	chr11	73309636	C	T	480	exonic	nonsynonymous_SNV	ARHGEF17	.	ARHGEF17:NM_014786:exon1:c.C998T:p.P333L	.	.	11q13.4	.	.	.	.	.	.	NA	PASS	-10	.	0.001	0.9	0.433	0.001	0.996	0.695	0.46	-1.09	0.485	4.768	24.7	0.998	0.298	-0.951	0.11	0.658	4.02	0.851	9.808	.	433,35	0.076	433	35	0.076
BT474_Palbo_Res2	chr12_56617451_G_A	chr12	56617451	G	A	59	exonic	nonsynonymous_SNV	BAZ2A	.	BAZ2A:NM_001300905:exon2:c.C80T:p.S27L,BAZ2A:NM_013449:exon2:c.C86T:p.S29L,BAZ2A:NM_001351156:exon3:c.C80T:p.S27L	.	.	12q13.3	.	.	.	.	.	.	NA	PASS	-10	.	0	0.948	0.833	0.001	0.962	0.895	2.21	-1.93	0.287	6.463	29.9	0.999	0.988	-1.068	0.065	0.707	4.42	0.953	16.18	.	47,11	0.184	47	11	0.184
BT474_Palbo_Res2	chr16_729651_G_A	chr16	729651	G	A	33	exonic	nonsynonymous_SNV	HAGHL	.	HAGHL:NM_001323636:exon8:c.G964A:p.D322N	.	.	16p13.3	.	.	.	.	.	.	NA	PASS	-10	.	.	.	.	.	.	.	.	.	.	.	.	.	.	.	.	.	.	.	.	.	20,10	0.321	20	10	0.321
BT474_Palbo_Res2	chr16_734831_G_C	chr16	734831	G	C	98	exonic	nonsynonymous_SNV	CIAO3	.	NARFL:NM_022493:exon5:c.C480G:p.F160L,NARFL:NM_001304799:exon6:c.C174G:p.F58L	.	.	16p13.3	.	.	.	.	.	.	NA	PASS	-10	.	0.561	0.008	0.04	0	1	0.305	1.23	-2.86	0.882	2.641	20.4	0.975	0.918	-0.971	0.06	0.722	1.3	0.135	9.745	Iron_hydrogenase\x3bIron_hydrogenase,_large_subunit,_C-terminal	78,19	0.208	78	19	0.208
BT474_Palbo_Res2	chr16_2472754_C_T	chr16	2472754	C	T	61	exonic	stopgain	NTN3	.	NTN3:NM_006181:exon2:c.C982T:p.R328X	.	.	16p13.3	9.668e-06	.	.	.	.	.	NA	PASS	-10	.	.	.	.	0	1	.	.	.	.	9.57	35	0.997	0.892	.	.	0.598	-0.453	-0.44	6.388	EGF-like,_laminin	50,8	0.17	50	8	0.17
BT474_Palbo_Res2	chr16_3224535_G_A	chr16	3224535	G	A	37	exonic	nonsynonymous_SNV	ZNF200	.	ZNF200:NM_001145446:exon5:c.C542T:p.S181L,ZNF200:NM_001145447:exon5:c.C542T:p.S181L,ZNF200:NM_001145448:exon5:c.C542T:p.S181L,ZNF200:NM_003454:exon5:c.C545T:p.S182L,ZNF200:NM_198087:exon5:c.C542T:p.S181L,ZNF200:NM_198088:exon5:c.C545T:p.S182L	ID\x3dCOSM2918900\x3bOCCURENCE\x3d1(urinary_tract)	.	16p13.3	.	.	.	.	.	.	NA	PASS	-10	.	0.428	0.004	0.011	0.67	1	1.7	3.32	-0.56	0.083	-0.249	0.864	0.956	0.001	-0.961	0.021	0.707	1.14	-0.529	4.636	.	31,6	0.167	31	6	0.167
BT474_Palbo_Res2	chr16_11761483_C_T	chr16	11761483	C	T	58	exonic	nonsynonymous_SNV	ZC3H7A	.	ZC3H7A:NM_014153:exon19:c.G2242A:p.V748M	.	.	16p13.13	.	.	.	.	.	.	NA	PASS	-10	.	0.002	0.998	0.924	0	1	1.7	2.35	-2.44	0.58	6.59	31	0.999	0.992	-1.096	0.102	0.707	5.66	0.935	18.744	.	45,13	0.256	45	13	0.256
BT474_Palbo_Res2	chr17_17794138_A_G	chr17	17794138	A	G	105	exonic	nonsynonymous_SNV	RAI1	.	RAI1:NM_030665:exon3:c.A1190G:p.N397S	.	.	17p11.2	.	.	.	.	.	.	NA	PASS	-10	.	0.17	0.615	0.219	0	0.666	1.04	1.27	-1.16	0.203	2.523	19.61	0.996	0.988	-1.028	0.062	0.707	5.55	1.199	15.682	.	78,21	0.216	78	21	0.216
BT474_Palbo_Res2	chr17_48597963_C_G	chr17	48597963	C	G	720	exonic	nonsynonymous_SNV	HOXB6	.	HOXB6:NM_018952:exon3:c.G188C:p.G63A	.	.	17q21.32	.	.	.	.	.	.	NA	PASS	-10	.	0.318	0.049	0.022	0.167	1	0.895	-2.63	-1	0.223	1.477	13.19	0.943	0.82	-0.411	0.472	0.437	4.4	0.932	2.406	.	688,10	0.015	688	10	0.015
BT474_Palbo_Res2	chr17_53823845_A_ATGTAATAATTTCAGTTTCTTTTGGATCTCGGTCAGAGCATCAATTTTCTGCTCCAAAAT	chr17	53823845	A	ATGTAATAATTTCAGTTTCTTTTGGATCTCGGTCAGAGCATCAATTTTCTGCTCCAAAAT	1127	exonic	frameshift_insertion	KIF2B	.	KIF2B:NM_032559:exon1:c.812_813insTGTAATAATTTCAGTTTCTTTTGGATCTCGGTCAGAGCATCAATTTTCTGCTCCAAAAT:p.D272Vfs*117	.	.	17q22	.	.	.	.	.	.	NA	PASS	-10	.	.	.	.	.	.	.	.	.	.	.	.	.	.	.	.	.	.	.	.	.	1050,77	0.086	1050	77	0.086
BT474_Palbo_Res2	chr17_69106102_C_G	chr17	69106102	C	G	134	exonic	nonsynonymous_SNV	ABCA6	.	ABCA6:NM_080284:exon19:c.G2499C:p.W833C	.	.	17q24.3	.	.	.	.	.	.	NA	PASS	-10	.	0	1	0.999	0	1	2.7	-2.05	-12.47	0.861	6.263	29	0.993	0.977	0.717	0.775	0.707	4.74	0.935	16.801	.	122,9	0.094	122	9	0.094
BT474_Palbo_Res2	chr17_75840240_T_G	chr17	75840240	T	G	44	exonic	nonsynonymous_SNV	UNC13D	.	UNC13D:NM_199242:exon10:c.A843C:p.Q281H	.	.	17q25.1	.	.	.	.	.	.	NA	PASS	-10	.	0.076	0.967	0.558	0.005	0.761	0.69	-0.41	-1.66	0.295	3.49	23.1	0.997	0.394	-0.894	0.155	0.672	2.42	0	5.083	C2_domain	30,14	0.333	30	14	0.333
BT474_Palbo_Res2	chr18_25227328_G_A	chr18	25227328	G	A	175	exonic	nonsynonymous_SNV	ZNF521	.	ZNF521:NM_015461:exon4:c.C590T:p.T197M	.	.	18q11.2	.	.	.	.	.	.	NA	PASS	-10	.	0.008	0.997	0.932	0	1	2.635	1.74	-2.98	0.466	4.359	24.1	0.863	0.974	-0.597	0.179	0.722	5.98	1.048	15.873	Zinc_finger_C2H2-type/integrase_DNA-binding_domain\x3bZinc_finger,_C2H2	150,24	0.151	150	24	0.151
BT474_Palbo_Res2	chr18_56696314_C_T	chr18	56696314	C	T	67	exonic	nonsynonymous_SNV	WDR7	.	WDR7:NM_015285:exon12:c.C1430T:p.S477L,WDR7:NM_052834:exon12:c.C1430T:p.S477L	.	.	18q21.31	.	.	.	.	.	.	NA	PASS	-10	.	0.085	0.911	0.621	0	1	1.555	3.03	-3.45	0.888	5.447	26.1	0.999	0.982	-1.084	0.037	0.638	5.73	0.935	19.855	Quinonprotein_alcohol_dehydrogenase-like_superfamily\x3bWD40-repeat-containing_domain\x3bWD40/YVTN_repeat-like-containing_domain	58,9	0.17	58	9	0.17
BT474_Palbo_Res2	chr19_8937551_ACCCCATGACTGGTGGCCATTGAAGGTGTGGTCTCTGGCTCACTAGAAGAAAGAGTTAGAATTGGAATAGTTGTACTGGTCACTGCCCTGGAACTAGTGACCAGAGGGGTCACCACTCCTGATACCCCAGGTGAAACAGTTGGAGTTGGAACAGCTGAGCTGGCTTCTG_A	chr19	8937551	ACCCCATGACTGGTGGCCATTGAAGGTGTGGTCTCTGGCTCACTAGAAGAAAGAGTTAGAATTGGAATAGTTGTACTGGTCACTGCCCTGGAACTAGTGACCAGAGGGGTCACCACTCCTGATACCCCAGGTGAAACAGTTGGAGTTGGAACAGCTGAGCTGGCTTCTG	A	280	exonic	nonframeshift_deletion	MUC16	.	MUC16:NM_024690:exon5:c.33236_33403del:p.A11079_G11134del	.	.	19p13.2	.	.	.	.	.	.	NA	PASS	-10	.	.	.	.	.	.	.	.	.	.	.	.	.	.	.	.	.	.	.	.	.	255,25	0.031	255	25	0.031
BT474_Palbo_Res2	chr19_30548471_G_A	chr19	30548471	G	A	236	exonic	nonsynonymous_SNV	ZNF536	.	ZNF536:NM_014717:exon4:c.G2852A:p.G951E	.	.	19q12	.	.	.	.	.	.	NA	PASS	-10	.	0.026	0.181	0.102	0.138	1	0.695	2.99	-1.45	0.302	0.897	10.06	0.875	0.876	-1.002	0.022	0.487	4.38	0.043	15.565	.	199,29	0.124	199	29	0.124
BT474_Palbo_Res2	chr20_2483343_C_G	chr20	2483343	C	G	69	exonic	nonsynonymous_SNV	ZNF343	.	ZNF343:NM_001282498:exon4:c.G1348C:p.E450Q,ZNF343:NM_001282496:exon6:c.G1618C:p.E540Q,ZNF343:NM_001321800:exon6:c.G1618C:p.E540Q,ZNF343:NM_001321805:exon6:c.G1615C:p.E539Q,ZNF343:NM_024325:exon6:c.G1618C:p.E540Q,ZNF343:NM_001282495:exon7:c.G1618C:p.E540Q,ZNF343:NM_001282497:exon7:c.G1741C:p.E581Q,ZNF343:NM_001321801:exon7:c.G1741C:p.E581Q,ZNF343:NM_001321802:exon7:c.G1738C:p.E580Q,ZNF343:NM_00132…	.	.	20p13	.	.	.	.	.	.	NA	PASS	-10	.	1	0.002	0.002	.	1	-0.24	0.87	1.92	0.068	-1.447	0.003	0.806	0.022	-0.991	0.036	0.707	-1.28	0.581	7.213	Zinc_finger_C2H2-type/integrase_DNA-binding_domain\x3bZinc_finger,_C2H2\x3bZinc_finger,_C2H2-like	54,14	0.22	54	14	0.22
BT474_Palbo_Res2	chr20_34481184_G_T	chr20	34481184	G	T	233	exonic	stopgain	ITCH	.	ITCH:NM_001257138:exon19:c.G1741T:p.E581X,ITCH:NM_001324198:exon20:c.G2071T:p.E691X,ITCH:NM_031483:exon20:c.G2071T:p.E691X,ITCH:NM_001257137:exon21:c.G2194T:p.E732X,ITCH:NM_001324197:exon21:c.G2194T:p.E732X	.	.	20q11.22	.	.	.	.	.	.	NA	PASS	-10	.	.	.	.	0	1	.	.	.	.	13.422	42	0.996	0.99	.	.	0.732	4.52	1.048	14.003	HECT	219,8	0.041	219	8	0.041
BT474_Palbo_Res2	chr20_50579702_G_T	chr20	50579702	G	T	39	splicing	.	PTPN1	NM_002827:exon8:c.865-1G>T\x3bNM_001278618:exon7:c.646-1G>T	.	.	.	20q13.13	.	.	.	.	.	.	NA	PASS	-10	.	.	.	.	.	1	.	.	.	.	5.563	26.4	0.995	0.978	.	.	0.257	5.73	1.036	19.905	.	29,6	0.191	29	6	0.191
BT474_Palbo_Res2	chr20_57266007_G_C	chr20	57266007	G	C	389	exonic	nonsynonymous_SNV	BMP7	.	BMP7:NM_001719:exon1:c.C116G:p.S39W	.	.	20q13.31	.	.	.	.	.	.	NA	PASS	-10	.	0.001	1	1	0	1	2.74	-0.29	-3.34	0.843	6.841	33	0.992	0.99	0.221	0.541	0.652	5.04	0.998	18.385	Transforming_growth_factor-beta,_N-terminal	371,9	0.026	371	9	0.026
BT474_Palbo_Res2	chr21_42653819_G_A	chr21	42653819	G	A	14	exonic	nonsynonymous_SNV	PDE9A	.	PDE9A:NM_001001567:exon1:c.G5A:p.G2E,PDE9A:NM_001001569:exon1:c.G5A:p.G2E,PDE9A:NM_001001570:exon1:c.G5A:p.G2E,PDE9A:NM_001001574:exon1:c.G5A:p.G2E,PDE9A:NM_001001578:exon1:c.G5A:p.G2E,PDE9A:NM_001001583:exon1:c.G5A:p.G2E,PDE9A:NM_002606:exon1:c.G5A:p.G2E	.	.	21q22.3	.	.	.	.	.	.	NA	PASS	-10	.	0	1	1	0.59	1	1.7	-1.48	-0.14	0.529	5.561	26.4	0.995	0.761	0.394	0.732	0.726	3.67	0.819	12.315	.	5,9	0.636	5	9	0.636
BT474_Palbo_Res2	chr22_30935133_C_T	chr22	30935133	C	T	99	exonic	nonsynonymous_SNV	MORC2	.	MORC2:NM_001303256:exon19:c.G1841A:p.R614Q,MORC2:NM_001303257:exon19:c.G1841A:p.R614Q,MORC2:NM_014941:exon20:c.G1655A:p.R552Q	.	.	22q12.2	.	.	.	.	.	.	NA	PASS	-10	.	0.265	1	0.992	0	1	1.295	2.61	-0.34	0.643	4.59	24.4	0.999	0.995	-1.139	0.07	0.707	5.76	0.935	18.14	.	76,22	0.222	76	22	0.222
BT474_Palbo_Res2	chr22_41658331_G_A	chr22	41658331	G	A	54	exonic	nonsynonymous_SNV	XRCC6	.	XRCC6:NM_001288978:exon10:c.G1351A:p.E451K,XRCC6:NM_001288976:exon11:c.G1501A:p.E501K,XRCC6:NM_001288977:exon11:c.G1378A:p.E460K,XRCC6:NM_001469:exon11:c.G1501A:p.E501K	.	.	22q13.2	.	.	.	.	.	.	NA	PASS	-10	.	0.004	0.996	0.968	0	1	2.295	0.86	-3.26	0.78	7.032	33	0.999	0.995	-0.667	0.291	0.707	5.29	0.9	18.934	Ku70/Ku80_C-terminal_arm\x3bSPOC_like_C-terminal_domain	36,16	0.341	36	16	0.341
BT474_Palbo_Res2	chrX_2266788_G_C	chrX	2266788	G	C	133	exonic	nonsynonymous_SNV	DHRSX	.	DHRSX:NM_145177:exon5:c.C548G:p.S183C	.	.	Xp22.33	.	.	.	.	.	.	NA	PASS	-10	.	0	1	1	0	0.621	3.94	-4.17	-4.49	0.841	3.441	23	0.98	0.969	1.126	0.952	.	2.11	0.615	12.246	NAD(P)-binding_domain	113,18	0.148	113	18	0.148
BT474_Palbo_Res3	chr1_51933435_G_C	chr1	51933435	G	C	33	exonic	nonsynonymous_SNV	RAB3B	.	RAB3B:NM_002867:exon4:c.C355G:p.Q119E	.	0.000199681	1p32.3	9.488e-06	.	.	.	.	.	NA	PASS	-10	.	0.158	0.957	0.532	0	1	-1.47	-0.81	-1.59	0.71	1.535	13.5	0.993	0.99	-0.697	0.135	0.732	5.15	1.048	18.404	P-loop_containing_nucleoside_triphosphate_hydrolase\x3bSmall_GTP-binding_protein_domain	15,17	0.556	15	17	0.556
BT474_Palbo_Res3	chr1_155904499_C_G	chr1	155904499	C	G	35	exonic	nonsynonymous_SNV	RIT1	.	RIT1:NM_001256820:exon4:c.G133C:p.E45Q,RIT1:NM_001256821:exon5:c.G292C:p.E98Q,RIT1:NM_006912:exon5:c.G241C:p.E81Q	.	.	1q22	.	Pathogenic	Noonan_syndrome	RCV000207347.1	MeSH:MedGen:Orphanet:SNOMED_CT	D009634:C0028326:ORPHA648:205824006	NA	PASS	-10	.	0.321	0.825	0.392	0	1	1.935	-1.18	-2.12	0.747	4.706	24.6	0.998	0.982	-0.484	0.336	0.707	5.76	0.892	19.572	P-loop_containing_nucleoside_triphosphate_hydrolase\x3bSmall_GTP-binding_protein_domain	16,19	0.533	16	19	0.533
BT474_Palbo_Res3	chr2_74047038_C_G	chr2	74047038	C	G	45	exonic	nonsynonymous_SNV	TET3	.	TET3:NM_001287491:exon3:c.C1121G:p.S374C	.	.	2p13.1	.	.	.	.	.	.	NA	PASS	-10	.	0.004	0.993	0.628	.	0.989	0.345	1.77	-1.72	0.215	4.176	23.8	0.988	0.672	-1.05	0.06	0.632	5.84	0.935	13.82	.	14,28	0.667	14	28	0.667
BT474_Palbo_Res3	chr2_203171941_G_C	chr2	203171941	G	C	23	exonic	nonsynonymous_SNV	NBEAL1	.	NBEAL1:NM_001114132:exon39:c.G6029C:p.R2010T	.	.	2q33.2	.	.	.	.	.	.	NA	PASS	-10	.	0	1	0.998	0	1	3.835	-1.11	-5.6	0.87	6.582	31	0.989	0.995	0.702	0.751	0.615	5.26	1.048	18.829	BEACH_domain	13,10	0.438	13	10	0.438
BT474_Palbo_Res3	chr2_238184045_C_T	chr2	238184045	C	T	34	exonic	nonsynonymous_SNV	ILKAP	.	ILKAP:NM_030768:exon7:c.G601A:p.E201K	.	.	2q37.3	.	.	.	.	.	.	NA	PASS	-10	.	0.424	0.242	0.16	0	1	1.52	2.29	-2.37	0.688	5.933	27.6	0.999	0.943	-1.123	0.05	0.707	5.42	0.852	16.147	Protein_phosphatase_2C_(PP2C)-like_domain	22,12	0.375	22	12	0.375
BT474_Palbo_Res3	chr4_55896716_G_C	chr4	55896716	G	C	16	splicing	.	EXOC1	NM_001024924:exon16:c.1954-1G>C\x3bNM_018261:exon16:c.1954-1G>C\x3bNM_178237:exon15:c.1909-1G>C	.	.	.	4q12	.	.	.	.	.	.	NA	PASS	-10	.	.	.	.	.	1	.	.	.	.	4.992	25.1	0.995	0.928	.	.	0.164	6.06	1.048	20.621	.	0,14	0.932	0	14	0.932
BT474_Palbo_Res3	chr4_86107326_C_T	chr4	86107326	C	T	29	exonic	nonsynonymous_SNV	MAPK10	.	MAPK10:NM_001318067:exon4:c.G263A:p.R88K,MAPK10:NM_001351624:exon5:c.G149A:p.R50K,MAPK10:NM_001351625:exon5:c.G149A:p.R50K,MAPK10:NM_002753:exon5:c.G263A:p.R88K,MAPK10:NM_138980:exon5:c.G149A:p.R50K,MAPK10:NM_138982:exon5:c.G263A:p.R88K	.	.	4q21.3	.	.	.	.	.	.	NA	PASS	-10	.	0.698	0.003	0.007	0	1	-0.515	-0.01	-0.35	0.756	2.985	22.2	0.987	0.987	-0.7	0.298	0.615	6.05	0.935	20.601	Protein_kinase_domain\x3bProtein_kinase-like_domain\x3bSerine/threonine/dual_specificity_protein_kinase,_catalytic__domain	7,22	0.783	7	22	0.783
BT474_Palbo_Res3	chr4_102578892_G_C	chr4	102578892	G	C	67	exonic	nonsynonymous_SNV	NFKB1	.	NFKB1:NM_001165412:exon8:c.G580C:p.E194Q,NFKB1:NM_001319226:exon8:c.G580C:p.E194Q,NFKB1:NM_003998:exon8:c.G583C:p.E195Q	.	.	4q24	.	.	.	.	.	.	NA	PASS	-10	.	0.106	0.191	0.149	0.004	0.998	0.255	0.96	-0.65	0.197	2.366	18.6	0.995	0.922	-1.067	0.072	0.722	5.51	0.998	19.408	Rel_homology_domain\x3bp53-like_transcription_factor,_DNA-binding	21,45	0.705	21	45	0.705
BT474_Palbo_Res3	chr4_154489425_G_C	chr4	154489425	G	C	78	exonic	nonsynonymous_SNV	DCHS2	.	DCHS2:NM_001142552:exon1:c.C1931G:p.S644C	.	.	4q31.3	.	.	.	.	.	.	NA	PASS	-10	.	0.004	0.999	0.976	.	0.98	1.99	0.48	-2.26	0.317	4.703	24.6	0.989	0.992	-0.53	0.316	0.549	5.3	1.044	17.705	Cadherin\x3bCadherin-like	26,52	0.667	26	52	0.667
BT474_Palbo_Res3	chr5_180947661_T_C	chr5	180947661	T	C	76	exonic	nonsynonymous_SNV	BTNL8	.	BTNL8:NM_001159708:exon4:c.T823C:p.F275L,BTNL8:NM_024850:exon4:c.T823C:p.F275L	.	.	5q35.3	3.766e-05	.	.	.	.	.	NA	PASS	-10	.	1	0.008	0.002	.	1	0.69	4.54	0.39	0.078	-0.128	1.529	0.779	0.003	-0.892	0.005	0.487	0.299	0.491	3.303	B30.2/SPRY_domain	33,43	0.554	33	43	0.554
BT474_Palbo_Res3	chr6_36139310_G_C	chr6	36139310	G	C	74	exonic	nonsynonymous_SNV	MAPK13	.	MAPK13:NM_002754:exon12:c.G1035C:p.E345D	.	.	6p21.31	.	.	.	.	.	.	NA	PASS	-10	.	0.016	0.407	0.281	0	1	2.51	-0.43	-2.46	0.726	6.294	29.1	0.999	0.923	-0.607	0.211	0.744	4.37	1.048	9.393	.	33,40	0.545	33	40	0.545
BT474_Palbo_Res3	chr8_30799649_C_G	chr8	30799649	C	G	16	exonic	nonsynonymous_SNV	PPP2CB	.	PPP2CB:NM_001009552:exon2:c.G209C:p.R70T	.	.	8p12	.	.	.	.	.	.	NA	PASS	-10	.	0.001	0.073	0.059	0	1	2.84	0.86	-4.49	0.579	4.164	23.8	0.993	0.945	-0.634	0.206	0.722	4.47	0.852	17.099	Calcineurin-like_phosphoesterase_domain,_apaH_type\x3bMetallo-dependent_phosphatase-like\x3bSerine/threonine-specific_protein_phosphatase/bis(5-nucleosyl)-tetraphosphatase	5,11	0.692	5	11	0.692
BT474_Palbo_Res3	chr10_32021026_G_C	chr10	32021026	G	C	26	exonic	nonsynonymous_SNV	KIF5B	.	KIF5B:NM_004521:exon19:c.C2200G:p.Q734E	.	.	10p11.22	.	.	.	.	.	.	NA	PASS	-10	.	0.01	0.032	0.041	0	1	1.5	-1.03	-0.87	0.49	3.832	23.4	0.988	0.99	-0.483	0.38	0.707	5.36	0.902	19.071	.	12,12	0.551	12	12	0.551
BT474_Palbo_Res3	chr12_100088996_C_G	chr12	100088996	C	G	31	exonic	nonsynonymous_SNV	UHRF1BP1L	.	UHRF1BP1L:NM_001006947:exon8:c.G940C:p.D314H,UHRF1BP1L:NM_015054:exon8:c.G940C:p.D314H	.	.	12q23.1	.	.	.	.	.	.	NA	PASS	-10	.	0.001	1	0.999	0	1	2.015	2.28	-6.1	0.973	5.779	27.1	0.995	0.981	-0.584	0.264	0.732	5.24	0.892	18.834	.	11,18	0.625	11	18	0.625
BT474_Palbo_Res3	chr13_29480260_G_A	chr13	29480260	G	A	21	exonic	nonsynonymous_SNV	MTUS2	.	MTUS2:NM_015233:exon3:c.G232A:p.E78K,MTUS2:NM_001033602:exon8:c.G3325A:p.E1109K	.	.	13q12.3	.	.	.	.	.	.	NA	PASS	-10	.	0.153	0.43	0.213	0.047	1	1.445	2.69	-2.33	0.155	5.393	26	0.999	0.715	-1.129	0.057	0.497	5.44	1.048	17.985	.	3,17	0.801	3	17	0.801
BT474_Palbo_Res3	chr15_40196716_C_A	chr15	40196716	C	A	43	exonic	nonsynonymous_SNV	BUB1B	.	BUB1B:NM_001211:exon9:c.C1230A:p.F410L	.	.	15q15.1	.	.	.	.	.	.	NA	PASS	-10	.	0.109	1	0.999	0	0.992	1.62	2.43	-3.41	0.77	5.328	25.8	0.999	0.925	-1.034	0.07	0.707	3.7	0.07	11.68	.	24,17	0.323	24	17	0.323
BT474_Palbo_Res3	chr17_40479794_C_G	chr17	40479794	C	G	55	exonic	nonsynonymous_SNV	TNS4	.	TNS4:NM_032865:exon10:c.G1790C:p.G597A	.	.	17q21.2	.	.	.	.	.	.	NA	PASS	-10	.	0.01	1	1	0	1	2.81	-0.06	-5.78	0.831	4.971	25.1	0.998	0.964	0.153	0.498	0.403	4.86	0.926	17.613	Pleckstrin_homology-like_domain\x3bTensin_phosphotyrosine-binding_domain	22,31	0.605	22	31	0.605
BT474_Palbo_Res3	chr17_42338759_G_C	chr17	42338759	G	C	14	exonic	nonsynonymous_SNV	STAT3	.	STAT3:NM_003150:exon6:c.C522G:p.F174L,STAT3:NM_139276:exon6:c.C522G:p.F174L,STAT3:NM_213662:exon6:c.C522G:p.F174L	.	.	17q21.2	.	.	.	.	.	.	NA	PASS	-10	.	0.024	0.903	0.879	0	1	1.43	0.18	-4.12	0.896	6.396	29.6	0.999	0.916	-0.697	0.259	0.732	4.35	0.953	10.703	STAT_transcription_factor,_all-alpha\x3bSTAT_transcription_factor,_coiled_coil	5,9	0.667	5	9	0.667
BT474_Palbo_Res3	chr19_14571967_C_T	chr19	14571967	C	T	22	exonic	nonsynonymous_SNV	NDUFB7	.	NDUFB7:NM_004146:exon1:c.G34A:p.D12N	.	.	19p13.12	.	.	.	.	.	.	NA	PASS	-10	.	0.18	0.379	0.032	0	1	1.15	0.75	-1.28	0.078	2.263	17.93	0.987	0.284	-1.044	0.084	0.442	4.21	0.892	11.53	.	14,8	0.421	14	8	0.421
BT474_Palbo_Res3	chr19_37565217_G_C	chr19	37565217	G	C	17	exonic	nonsynonymous_SNV	ZNF571	.	ZNF571:NM_001321272:exon4:c.C1211G:p.S404C,ZNF571:NM_016536:exon4:c.C1211G:p.S404C,ZNF571:NM_001290314:exon5:c.C1211G:p.S404C	.	.	19q13.12	.	.	.	.	.	.	NA	PASS	-10	.	0.01	1	0.971	.	1	2.975	4.67	-3.81	0.38	3.131	22.6	0.976	0	-1.102	0.025	0.554	1.33	0.811	8.892	Zinc_finger_C2H2-type/integrase_DNA-binding_domain\x3bZinc_finger,_C2H2\x3bZinc_finger,_C2H2-like	5,12	0.667	5	12	0.667
BT474_Palbo_Res3	chr20_3203326_C_T	chr20	3203326	C	T	27	exonic	nonsynonymous_SNV	DDRGK1	.	DDRGK1:NM_023935:exon2:c.G182A:p.G61E	.	.	20p13	.	.	.	.	.	.	NA	PASS	-10	.	1	0.004	0.007	0.001	0.789	0	1.01	0.35	0.082	-0.493	0.229	0.882	0.088	-0.981	0.037	0.726	1.52	0.069	4.542	.	14,13	0.5	14	13	0.5
BT474_Palbo_Res3	chr20_63689116_C_T	chr20	63689116	C	T	44	exonic	nonsynonymous_SNV	RTEL1	.	RTEL1:NM_001283010:exon21:c.C1193T:p.A398V,RTEL1:NM_001283009:exon22:c.C1862T:p.A621V,RTEL1:NM_016434:exon22:c.C1862T:p.A621V,RTEL1:NM_032957:exon22:c.C1934T:p.A645V	.	0.000199681	20q13.33	1.896e-05	.	.	.	.	.	NA	PASS	-10	.	0.002	1	0.997	0	1	3.52	-0.27	-3.69	0.878	6.88	33	0.999	0.897	1.056	0.918	0.635	4.76	0.852	14.779	ATP-dependent_helicase,_C-terminal\x3bP-loop_containing_nucleoside_triphosphate_hydrolase	28,15	0.371	28	15	0.371
BT474_Palbo_Res3	chr2_167258822_C_T	chr2	167258822	C	T	26	exonic	nonsynonymous_SNV	XIRP2	.	XIRP2:NM_001199145:exon8:c.C1610T:p.S537L,XIRP2:NM_001079810:exon10:c.C2276T:p.S759L,XIRP2:NM_001199143:exon11:c.C2375T:p.S792L	.	.	2q24.3	.	.	.	.	.	.	NA	PASS	-10	.	0.006	0.973	0.791	.	1	.	-1.38	-1.69	0.498	1.088	11.15	0.999	0.9	0.027	0.529	0.554	4.79	0.935	7.955	.	16,10	0.391	16	10	0.391
BT474_Palbo_Res3	chr1_68046948_G_C	chr1	68046948	G	C	73	exonic	stopgain	DIRAS3	.	DIRAS3:NM_004675:exon4:c.C350G:p.S117X	.	.	1p31.3	.	.	.	.	.	.	NA	PASS	-10	.	.	.	.	.	1	.	.	.	.	11.106	37	0.995	0.928	.	.	0.615	2.77	0.78	9.74	P-loop_containing_nucleoside_triphosphate_hydrolase\x3bSmall_GTP-binding_protein_domain	58,13	0.17	58	13	0.17
BT474_Palbo_Res3	chr1_156126216_G_A	chr1	156126216	G	A	25	exonic	nonsynonymous_SNV	LMNA	.	LMNA:NM_001257374:exon1:c.G13A:p.E5K	.	.	1q22	.	.	.	.	.	.	NA	PASS	-10	.	0.641	0.003	0.001	.	1	.	-1.62	0.95	0.109	0.842	9.723	0.921	0.063	-0.896	0.096	0.394	-3.68	-0.326	12.656	.	18,6	0.263	18	6	0.263
BT474_Palbo_Res3	chr1_173833490_A_G	chr1	173833490	A	G	147	exonic	nonsynonymous_SNV	DARS2	.	DARS2:NM_018122:exon6:c.A607G:p.N203D	.	.	1q25.1	.	.	.	.	.	.	NA	PASS	-10	.	0.135	0.768	0.56	0	1	-0.695	-1.77	-2.67	0.166	2.921	21.9	0.996	0.977	-0.686	0.141	0.732	4.82	1.199	10.88	Aminoacyl-tRNA_synthetase,_class_II\x3bAminoacyl-tRNA_synthetase,_class_II_(D/K/N)	138,6	0.05	138	6	0.05
BT474_Palbo_Res3	chr1_220157411_G_C	chr1	220157411	G	C	67	exonic	nonsynonymous_SNV	RAB3GAP2	.	RAB3GAP2:NM_012414:exon31:c.C3414G:p.I1138M	.	.	1q41	.	.	.	.	.	.	NA	PASS	-10	.	0.102	0.109	0.125	0.17	1	0.345	1.5	-0.08	0.136	1.232	11.91	0.971	0.14	-1.022	0.04	0.722	-0.945	0.064	7.522	Rab3GAP_regulatory_subunit,_C-terminal	52,14	0.246	52	14	0.246
BT474_Palbo_Res3	chr2_91941167_A_G	chr2	91941167	A	G	14	ncRNA_exonic	.	ACTR3BP2	.	.	.	.	2p11.1	.	.	.	.	.	.	NA	PASS	-10	.	.	.	.	.	.	.	.	.	.	.	.	.	.	.	.	.	.	.	.	.	6,7	0.462	6	7	0.462
BT474_Palbo_Res3	chr2_102166188_G_A	chr2	102166188	G	A	65	exonic	nonsynonymous_SNV	IL1R1	.	IL1R1:NM_001320983:exon4:c.G130A:p.E44K,IL1R1:NM_001320984:exon4:c.G13A:p.E5K,IL1R1:NM_000877:exon6:c.G562A:p.E188K,IL1R1:NM_001288706:exon6:c.G562A:p.E188K,IL1R1:NM_001320978:exon6:c.G562A:p.E188K,IL1R1:NM_001320980:exon6:c.G562A:p.E188K,IL1R1:NM_001320981:exon6:c.G562A:p.E188K,IL1R1:NM_001320982:exon6:c.G562A:p.E188K	.	.	2q12.1	.	.	.	.	.	.	NA	PASS	-10	.	0.903	0.008	0.025	0.359	1	1.73	2.63	-0.11	0.432	0.596	8.128	0.968	0.036	-0.964	0.034	0.713	-1.2	0.1	4.508	Immunoglobulin-like_domain\x3bImmunoglobulin-like_fold	48,15	0.26	48	15	0.26
BT474_Palbo_Res3	chr2_112390183_C_A	chr2	112390183	C	A	57	exonic	nonsynonymous_SNV	RGPD5;RGPD8	.	RGPD8:NM_001164463:exon20:c.G2762T:p.G921V,RGPD5:NM_005054:exon20:c.G2762T:p.G921V	.	.	2q14.1	.	.	.	.	.	.	NA	PASS	-10	.	0.075	0.996	0.893	.	1	2.25	0.95	-4.3	0.366	3.203	22.7	0.981	0.946	-0.875	0.177	0.693	2.33	0.621	7.066	.	45,10	0.186	45	10	0.186
BT474_Palbo_Res3	chr2_179981801_G_A	chr2	179981801	G	A	90	exonic	nonsynonymous_SNV	CWC22	.	CWC22:NM_020943:exon5:c.C403T:p.P135S	.	.	2q31.3	.	.	.	.	.	.	NA	PASS	-10	.	0.002	1	0.998	0	1	3.1	2.03	-7.52	0.882	6.273	29	0.999	0.99	-0.417	0.265	0.732	5.45	1.029	18.284	MIF4-like,_type_1/2/3	70,16	0.2	70	16	0.2
BT474_Palbo_Res3	chr2_231082959_TA_T	chr2	231082959	TA	T	52	exonic	frameshift_deletion	PSMD1	.	PSMD1:NM_001191037:exon13:c.1491delA:p.T499Qfs*9,PSMD1:NM_002807:exon13:c.1491delA:p.T499Qfs*9	.	.	2q37.1	.	.	.	.	.	.	NA	PASS	-10	.	.	.	.	.	.	.	.	.	.	.	.	.	.	.	.	.	.	.	.	.	35,12	0.31	35	12	0.31
BT474_Palbo_Res3	chr3_30606885_T_C	chr3	30606885	T	C	33	exonic	startloss	TGFBR2	.	TGFBR2:NM_001024847:exon1:c.T2C:p.M1?,TGFBR2:NM_003242:exon1:c.T2C:p.M1?	.	.	3p24.1	.	.	.	.	.	.	NA	PASS	-10	.	0	0.717	0.599	.	1	.	-2.11	-0.01	0.845	5.095	25.3	0.989	0.365	0.428	0.686	0.733	3.88	0.733	9.229	.	25,7	0.24	25	7	0.24
BT474_Palbo_Res3	chr3_48661569_C_T	chr3	48661569	C	T	55	exonic	nonsynonymous_SNV	CELSR3	.	CELSR3:NM_001407:exon1:c.G1066A:p.E356K	.	.	3p21.31	.	.	.	.	.	.	NA	PASS	-10	.	0.018	1	0.984	.	1	1.335	0.7	-3.48	0.552	6.83	33	0.999	0.908	-0.736	0.248	0.652	5.69	0.932	19.413	Cadherin\x3bCadherin-like	33,22	0.404	33	22	0.404
BT474_Palbo_Res3	chr3_169793681_G_T	chr3	169793681	G	T	59	exonic	stopgain	LRRC34	.	LRRC34:NM_153353:exon10:c.C1253A:p.S418X,LRRC34:NM_001172779:exon11:c.C1349A:p.S450X	.	.	3q26.2	.	.	.	.	.	.	NA	PASS	-10	.	.	.	.	0.467	1	.	.	.	.	9.576	35	0.978	0.096	.	.	0.651	3.02	0.953	4.572	.	51,8	0.143	51	8	0.143
BT474_Palbo_Res3	chr4_5665590_A_AAGGTCCCCAGCCAAGGTCCCCAGCGTGGACAATGGGCTGGGT	chr4	5665590	A	AAGGTCCCCAGCCAAGGTCCCCAGCGTGGACAATGGGCTGGGT	46	exonic	nonframeshift_insertion	EVC2	.	EVC2:NM_001166136:exon8:c.689_690insACCCAGCCCATTGTCCACGCTGGGGACCTTGGCTGGGGACCT:p.L230_V231insPSPLSTLGTLAGDL,EVC2:NM_147127:exon8:c.929_930insACCCAGCCCATTGTCCACGCTGGGGACCTTGGCTGGGGACCT:p.L310_V311insPSPLSTLGTLAGDL	.	.	4p16.2	.	.	.	.	.	.	NA	PASS	-10	.	.	.	.	.	.	.	.	.	.	.	.	.	.	.	.	.	.	.	.	.	38,8	0.24	38	8	0.24
BT474_Palbo_Res3	chr4_87094930_C_T	chr4	87094930	C	T	33	exonic	nonsynonymous_SNV	AFF1	.	AFF1:NM_001313960:exon5:c.C137T:p.S46F,AFF1:NM_001313959:exon7:c.C1223T:p.S408F,AFF1:NM_005935:exon7:c.C1223T:p.S408F,AFF1:NM_001166693:exon8:c.C1244T:p.S415F	.	.	4q21.3	.	.	.	.	.	.	NA	PASS	-10	.	0.105	0.999	0.99	0.179	0.983	2.085	-0.18	-2.53	0.306	5.653	26.7	0.997	0.828	-0.145	0.386	0.706	4.44	0.935	11.116	.	27,6	0.208	27	6	0.208
BT474_Palbo_Res3	chr5_95540807_C_G	chr5	95540807	C	G	23	exonic	nonsynonymous_SNV	TTC37	.	TTC37:NM_014639:exon8:c.G426C:p.L142F	.	.	5q15	.	.	.	.	.	.	NA	PASS	-10	.	0.021	1	0.981	0.002	0.999	2.045	-0.69	-2.59	0.782	5.293	25.7	0.999	0.839	0.014	0.587	0.719	4.63	0.069	10.953	.	12,10	0.471	12	10	0.471
BT474_Palbo_Res3	chr6_52072140_G_T	chr6	52072140	G	T	56	exonic	nonsynonymous_SNV	PKHD1	.	PKHD1:NM_138694:exon8:c.C577A:p.L193I,PKHD1:NM_170724:exon8:c.C577A:p.L193I	.	.	6p12.2	.	.	.	.	.	.	NA	PASS	-10	.	0.027	0.975	0.719	0.169	0.993	2.085	-2.3	-1.08	0.257	3.575	23.2	0.994	0.809	-0.296	0.554	0.487	3.77	0.143	7.763	.	44,9	0.207	44	9	0.207
BT474_Palbo_Res3	chr6_138307314_G_A	chr6	138307314	G	A	140	exonic	nonsynonymous_SNV	ARFGEF3	.	ARFGEF3:NM_020340:exon23:c.G3890A:p.R1297K	.	.	6q24.1	.	.	.	.	.	.	NA	PASS	-10	.	0.072	0.997	0.992	0	1	0.085	3.68	-1.87	0.726	5.946	27.6	0.997	0.993	-0.731	0.016	0.737	6.17	1.048	20.879	Armadillo-type_fold\x3bDomain_of_unknown_function_DUF1981,_Sec7_associated	115,20	0.158	115	20	0.158
BT474_Palbo_Res3	chr7_44007335_G_A	chr7	44007335	G	A	152	exonic	nonsynonymous_SNV	SPDYE1	.	SPDYE1:NM_175064:exon5:c.G700A:p.G234R	ID\x3dCOSM328576\x3bOCCURENCE\x3d1(upper_aerodigestive_tract),1(thyroid),4(kidney),5(large_intestine)	.	7p13	7.543e-05	.	.	.	.	.	NA	PASS	-10	0.0007	0.046	0.058	0.098	0.029	1	2.915	.	-6.36	0.156	1.181	11.65	0.979	0.008	-0.837	0.182	0.461	.	0.228	.	.	141,7	0.043	141	7	0.043
BT474_Palbo_Res3	chr7_101041451_G_A	chr7	101041451	G	A	162	exonic	nonsynonymous_SNV	MUC17	.	MUC17:NM_001040105:exon3:c.G10035A:p.M3345I	.	.	7q22.1	.	.	.	.	.	.	NA	PASS	-10	.	1	0.273	0.38	.	1	0.345	4.66	-0.42	0.142	-1.033	0.014	0.511	0	-0.9	0.005	0.487	-1.65	-4.872	1.79	.	144,15	0.113	144	15	0.113
BT474_Palbo_Res3	chr7_101041453_C_T	chr7	101041453	C	T	162	exonic	nonsynonymous_SNV	MUC17	.	MUC17:NM_001040105:exon3:c.C10037T:p.S3346F	.	.	7q22.1	.	.	.	.	.	.	NA	PASS	-10	.	0.004	0.932	0.799	.	1	0	4.22	-1.52	0.094	1.179	11.64	0.822	0.003	-0.946	0.009	0.487	-1.65	-0.653	4.019	.	144,15	0.113	144	15	0.113
BT474_Palbo_Res3	chr7_139417511_G_A	chr7	139417511	G	A	76	ncRNA_exonic	.	LOC100129148	.	.	.	.	7q34	.	.	.	.	.	.	NA	PASS	-10	.	.	.	.	.	.	.	.	.	.	.	.	.	.	.	.	.	.	.	.	.	68,6	0.092	68	6	0.092
BT474_Palbo_Res3	chr8_25466218_G_A	chr8	25466218	G	A	32	exonic	nonsynonymous_SNV	CDCA2	.	CDCA2:NM_001317906:exon4:c.G386A:p.R129Q,CDCA2:NM_001317907:exon5:c.G431A:p.R144Q,CDCA2:NM_152562:exon5:c.G431A:p.R144Q	.	.	8p21.2	1.885e-05	.	.	.	.	.	NA	PASS	-10	.	0.303	0.499	0.133	0.254	0.773	0.455	1.2	-0.94	0.106	2.768	21.2	0.991	0.561	-1.038	0.043	0.732	1.13	0.1	7.101	.	24,8	0.282	24	8	0.282
BT474_Palbo_Res3	chr9_128276748_G_C	chr9	128276748	G	C	86	exonic	nonsynonymous_SNV	SWI5	.	SWI5:NM_001040011:exon2:c.G419C:p.R140P,SWI5:NM_001318089:exon2:c.G299C:p.R100P,SWI5:NM_001318092:exon2:c.G131C:p.R44P	.	.	9q34.11	.	.	.	.	.	.	NA	PASS	-10	.	0.18	0.158	0.031	0.025	1	0.695	.	-0.13	0.5	4.966	25.1	0.979	0.693	-1.075	0.039	0.442	-0.781	-0.216	0.943	.	73,11	0.15	73	11	0.15
BT474_Palbo_Res3	chr9_129632704_A_T	chr9	129632704	A	T	190	exonic	startloss	NTMT1	.	NTMT1:NM_001286796:exon2:c.A1T:p.M1?,NTMT1:NM_001286797:exon2:c.A1T:p.M1?,NTMT1:NM_001286798:exon2:c.A1T:p.M1?,NTMT1:NM_001286799:exon2:c.A1T:p.M1?,NTMT1:NM_001286800:exon2:c.A1T:p.M1?,NTMT1:NM_001286801:exon2:c.A1T:p.M1?,NTMT1:NM_014064:exon2:c.A1T:p.M1?	.	.	9q34.11	.	.	.	.	.	.	NA	PASS	-10	.	1	0.264	0.019	0	1	.	2.22	-0.52	0.947	0.921	10.2	0.933	0.983	-1.072	0.028	0.672	5.3	1.112	14.075	.	178,7	0.038	178	7	0.038
BT474_Palbo_Res3	chr9_132814700_G_A	chr9	132814700	G	A	117	exonic	nonsynonymous_SNV	AK8	.	AK8:NM_001317958:exon10:c.C305T:p.A102V,AK8:NM_152572:exon10:c.C917T:p.A306V,AK8:NM_001317959:exon12:c.C401T:p.A134V	.	.	9q34.13	.	.	.	.	.	.	NA	PASS	-10	.	0.219	0.368	0.199	0.006	0.929	2.455	-1.13	-1.93	0.186	3.645	23.2	0.995	0.822	-0.281	0.444	0.554	4.35	0.953	15.827	P-loop_containing_nucleoside_triphosphate_hydrolase	98,16	0.145	98	16	0.145
BT474_Palbo_Res3	chr9_135663376_G_A	chr9	135663376	G	A	71	exonic	nonsynonymous_SNV	LCN9	.	LCN9:NM_001001676:exon1:c.G55A:p.D19N	.	0.0061901	9q34.3	0.0013	.	.	.	.	.	NA	PASS	-10	0.0008	1	0	0	0.459	1	-1.3	2.31	0.47	0.017	-2.086	0.001	0.277	0.002	-0.976	0.008	0.706	-4.84	-0.563	5.757	.	58,11	0.18	58	11	0.18
BT474_Palbo_Res3	chr10_4966951_G_C	chr10	4966951	G	C	88	exonic	nonsynonymous_SNV	AKR1C1	.	AKR1C1:NM_001353:exon3:c.G277C:p.E93Q	.	.	10p15.1	.	.	.	.	.	.	NA	PASS	-10	.	0.069	0.451	0.31	0	1	1.68	0.53	-2.41	0.46	0.597	8.136	0.932	0.41	-1.002	0.123	0.615	2.01	-0.021	8.992	NADP-dependent_oxidoreductase_domain	76,9	0.111	76	9	0.111
BT474_Palbo_Res3	chr10_101526195_G_C	chr10	101526195	G	C	38	exonic	nonsynonymous_SNV	BTRC	.	BTRC:NM_001256856:exon5:c.G661C:p.G221R,BTRC:NM_003939:exon5:c.G631C:p.G211R,BTRC:NM_033637:exon6:c.G739C:p.G247R	.	.	10q24.32	.	.	.	.	.	.	NA	PASS	-10	.	0.064	0.937	0.51	0	1	2.71	1.83	-5.58	0.499	3.386	23	0.998	0.946	-0.845	0.126	0.706	5.33	1.048	19.03	F-box_domain	25,11	0.318	25	11	0.318
BT474_Palbo_Res3	chr11_6546896_C_A	chr11	6546896	C	A	133	exonic	stopgain	DNHD1	.	DNHD1:NM_144666:exon21:c.C5957A:p.S1986X	.	.	11p15.4	.	.	.	.	.	.	NA	PASS	-10	.	.	.	.	0.117	1	.	.	.	.	9.62	36	0.996	0.058	.	.	0.554	3.95	0.065	12.307	P-loop_containing_nucleoside_triphosphate_hydrolase	120,10	0.093	120	10	0.093
BT474_Palbo_Res3	chr11_16754961_G_A	chr11	16754961	G	A	70	exonic	nonsynonymous_SNV	C11orf58	.	C11orf58:NM_014267:exon5:c.G409A:p.E137K	.	.	11p15.2	.	.	.	.	.	.	NA	PASS	-10	.	0.026	0.081	0.016	0.105	1	1.78	.	-1.12	0.354	4.632	24.5	0.998	0.956	-0.623	0.278	0.707	5.21	0.948	18.784	.	63,7	0.125	63	7	0.125
BT474_Palbo_Res3	chr11_65539816_G_T	chr11	65539816	G	T	85	exonic	nonsynonymous_SNV	LTBP3	.	LTBP3:NM_001164266:exon24:c.C2959A:p.P987T,LTBP3:NM_021070:exon24:c.C3310A:p.P1104T,LTBP3:NM_001130144:exon25:c.C3451A:p.P1151T	.	.	11q13.1	.	.	.	.	.	.	NA	PASS	-10	.	0.073	1	0.993	0.001	1	2.05	-3.21	-5.72	0.395	2.408	18.87	0.984	0.914	0.082	0.808	0.726	3.02	0.972	5.321	EGF-like_calcium-binding_domain\x3bEGF-like_calcium-binding,_conserved_site\x3bEpidermal_growth_factor-like_domain\x3bInsulin-like_growth_factor_binding_protein,_N-terminal\x3bTB_domain	78,6	0.084	78	6	0.084
BT474_Palbo_Res3	chr11_65539837_C_T	chr11	65539837	C	T	80	exonic	nonsynonymous_SNV	LTBP3	.	LTBP3:NM_001164266:exon24:c.G2938A:p.E980K,LTBP3:NM_021070:exon24:c.G3289A:p.E1097K,LTBP3:NM_001130144:exon25:c.G3430A:p.E1144K	.	.	11q13.1	.	.	.	.	.	.	NA	PASS	-10	.	1	0.894	0.548	0.005	1	1.385	-1.32	-0.58	0.391	4.084	23.7	0.996	0.613	-0.745	0.194	0.726	4.93	0.869	9.302	EGF-like_calcium-binding_domain\x3bEGF-like_calcium-binding,_conserved_site\x3bEpidermal_growth_factor-like_domain\x3bInsulin-like_growth_factor_binding_protein,_N-terminal\x3bTB_domain	71,6	0.09	71	6	0.09
BT474_Palbo_Res3	chr12_8874447_A_C	chr12	8874447	A	C	53	exonic	nonsynonymous_SNV	A2ML1	.	A2ML1:NM_001282424:exon23:c.A2771C:p.Y924S,A2ML1:NM_144670:exon34:c.A4244C:p.Y1415S	.	.	12p13.31	.	.	.	.	.	.	NA	PASS	-10	.	0.009	0.998	0.969	0.1	1	1.845	1.99	-4.57	0.751	3.907	23.5	0.972	0.035	-1.078	0.091	0.706	0.776	1.006	7.005	Alpha-macroglobulin,_receptor-binding	43,9	0.158	43	9	0.158
BT474_Palbo_Res3	chr12_121957213_G_T	chr12	121957213	G	T	53	exonic	stopgain	CFAP251	.	WDR66:NM_001178003:exon11:c.G1675T:p.E559X,WDR66:NM_144668:exon11:c.G1675T:p.E559X	.	.	12q24.31	.	.	.	.	.	.	NA	PASS	-10	.	.	.	.	0.002	1	.	.	.	.	10.427	36	0.994	0.144	.	.	0.615	3.5	0.897	9.306	.	42,11	0.2	42	11	0.2
BT474_Palbo_Res3	chr12_132604371_G_C	chr12	132604371	G	C	109	exonic	nonsynonymous_SNV	LRCOL1	.	LRCOL1:NM_001195520:exon5:c.C360G:p.N120K	.	.	12q24.33	.	.	.	.	.	.	NA	PASS	-10	.	.	.	.	.	.	1.32	.	.	0.097	0.107	3.682	0.552	0.005	.	.	0.167	-3.89	-0.713	3.491	.	90,16	0.17	90	16	0.17
BT474_Palbo_Res3	chr14_31116279_C_T	chr14	31116279	C	T	38	exonic	nonsynonymous_SNV	HECTD1	.	HECTD1:NM_015382:exon30:c.G5575A:p.V1859M	.	.	14q12	.	.	.	.	.	.	NA	PASS	-10	.	0.13	0.622	0.265	0.004	1	0.345	0.97	-0.36	0.468	3.433	23	0.999	0.972	-1.062	0.072	0.707	5.74	0.935	13.169	.	29,9	0.242	29	9	0.242
BT474_Palbo_Res3	chr14_90902820_C_G	chr14	90902820	C	G	225	exonic	nonsynonymous_SNV	RPS6KA5	.	RPS6KA5:NM_001322238:exon7:c.G450C:p.E150D,RPS6KA5:NM_001322228:exon8:c.G999C:p.E333D,RPS6KA5:NM_001322231:exon8:c.G390C:p.E130D,RPS6KA5:NM_001322232:exon8:c.G888C:p.E296D,RPS6KA5:NM_001322236:exon8:c.G1023C:p.E341D,RPS6KA5:NM_001322229:exon9:c.G1107C:p.E369D,RPS6KA5:NM_001322234:exon9:c.G531C:p.E177D,RPS6KA5:NM_001322237:exon9:c.G870C:p.E290D,RPS6KA5:NM_004755:exon9:c.G1107C:p.E369D,RPS6KA5:NM_1…	.	.	14q32.11	.	.	.	.	.	.	NA	PASS	-10	.	1	0.001	0.001	0	0.999	-1.68	0.61	1.46	0.051	0.654	8.525	0.094	0.766	-0.952	0.026	0.651	3.59	0.852	5.548	AGC-kinase,_C-terminal\x3bProtein_kinase,_C-terminal\x3bProtein_kinase-like_domain	207,10	0.045	207	10	0.045
BT474_Palbo_Res3	chr15_79456587_G_T	chr15	79456587	G	T	243	exonic	nonsynonymous_SNV	MINAR1	.	KIAA1024:NM_015206:exon2:c.G440T:p.S147I	.	.	15q25.1	.	.	.	.	.	.	NA	PASS	-10	.	0.002	0.412	0.133	0.038	0.91	1.5	1.39	-4.81	0.235	2.626	20.4	0.992	0.834	-1.019	0.074	0.554	3.8	0.1	11.576	.	197,36	0.156	197	36	0.156
BT474_Palbo_Res3	chr16_2530887_C_T	chr16	2530887	C	T	88	exonic	nonsynonymous_SNV	CEMP1	.	CEMP1:NM_001048212:exon1:c.G187A:p.E63K	.	.	16p13.3	.	.	.	.	.	.	NA	PASS	-10	.	.	0.478	0.065	.	1	0	0.56	-4	0.128	1.768	14.8	0.756	0.059	-1.051	0.058	0.726	-0.556	-0.079	3.569	.	75,13	0.181	75	13	0.181
BT474_Palbo_Res3	chr17_48613491_C_T	chr17	48613491	C	T	195	exonic	nonsynonymous_SNV	HOXB8	.	HOXB8:NM_024016:exon2:c.G443A:p.R148Q	.	.	17q21.32	.	.	.	.	.	.	NA	PASS	-10	.	0.002	0.997	0.979	0	1	3.7	-4.23	-2.83	0.483	7.215	34	0.999	0.893	1.094	0.959	0.37	3.09	0.794	14.683	Homeobox_domain\x3bHomeodomain-like	182,6	0.037	182	6	0.037
BT474_Palbo_Res3	chr17_63818153_C_T	chr17	63818153	C	T	185	exonic	nonsynonymous_SNV	DDX42	.	DDX42:NM_203499:exon18:c.C2572T:p.R858W,DDX42:NM_007372:exon19:c.C2572T:p.R858W	ID\x3dCOSM74349\x3bOCCURENCE\x3d1(ovary)	0.000199681	17q23.3	1.885e-05	.	.	.	.	.	NA	PASS	-10	.	0	0.997	0.865	0.953	1	1.78	1.95	-1.03	0.231	6.247	28.9	0.998	0.967	-1.084	0.101	0.672	4.09	0.807	7.798	.	165,17	0.11	165	17	0.11
BT474_Palbo_Res3	chr17_64171160_C_T	chr17	64171160	C	T	91	exonic	nonsynonymous_SNV	TEX2	.	TEX2:NM_001288732:exon7:c.G2611A:p.D871N,TEX2:NM_001288733:exon7:c.G2611A:p.D871N,TEX2:NM_018469:exon7:c.G2632A:p.D878N	.	.	17q23.3	.	.	.	.	.	.	NA	PASS	-10	.	0.081	0.969	0.925	0	1	2.045	0.68	-3.1	0.286	6.159	28.5	0.996	0.954	-0.645	0.296	0.719	6.03	0.935	20.56	Domain_of_unknown_function_DUF2404	85,6	0.067	85	6	0.067
BT474_Palbo_Res3	chr17_65168251_G_C	chr17	65168251	G	C	226	exonic	nonsynonymous_SNV	RGS9	.	RGS9:NM_001081955:exon8:c.G552C:p.E184D,RGS9:NM_001165933:exon8:c.G552C:p.E184D,RGS9:NM_003835:exon8:c.G552C:p.E184D	.	.	17q24.1	.	.	.	.	.	.	NA	PASS	-10	.	0	0.999	0.996	0	0.992	2.955	0.38	-2.92	0.764	5.451	26.1	0.926	0.906	-0.246	0.391	0.615	1.64	1.048	9.55	.	207,8	0.048	207	8	0.048
BT474_Palbo_Res3	chr18_56696314_C_T	chr18	56696314	C	T	66	exonic	nonsynonymous_SNV	WDR7	.	WDR7:NM_015285:exon12:c.C1430T:p.S477L,WDR7:NM_052834:exon12:c.C1430T:p.S477L	.	.	18q21.31	.	.	.	.	.	.	NA	PASS	-10	.	0.085	0.911	0.621	0	1	1.555	3.03	-3.45	0.888	5.447	26.1	0.999	0.982	-1.084	0.037	0.638	5.73	0.935	19.855	Quinonprotein_alcohol_dehydrogenase-like_superfamily\x3bWD40-repeat-containing_domain\x3bWD40/YVTN_repeat-like-containing_domain	51,14	0.234	51	14	0.234
BT474_Palbo_Res3	chr19_5220298_T_G	chr19	5220298	T	G	94	exonic	nonsynonymous_SNV	PTPRS	.	PTPRS:NM_130853:exon13:c.A2218C:p.T740P,PTPRS:NM_130855:exon14:c.A2230C:p.T744P,PTPRS:NM_130854:exon17:c.A3445C:p.T1149P,PTPRS:NM_002850:exon21:c.A3511C:p.T1171P	.	.	19p13.3	.	.	.	.	.	.	NA	PASS	-10	.	0.192	0.001	0.003	0.027	1	0.895	0.66	-1.17	0.315	0.521	7.592	0.919	0.801	-1.072	0.071	0.706	-1.02	-0.348	1.355	Fibronectin_type_III\x3bImmunoglobulin-like_fold	85,7	0.101	85	7	0.101
BT474_Palbo_Res3	chr19_13819455_C_A	chr19	13819455	C	A	131	exonic	nonsynonymous_SNV	ZSWIM4	.	ZSWIM4:NM_023072:exon9:c.C1672A:p.P558T	.	.	19p13.12	.	.	.	.	.	.	NA	PASS	-10	.	0.368	0.035	0.015	0.038	0.737	0.17	1	-2.79	0.119	2.267	17.95	0.912	0.781	-1.025	0.051	0.707	3.87	0.888	8.779	.	117,11	0.08	117	11	0.08
BT474_Palbo_Res3	chr19_17537378_G_C	chr19	17537378	G	C	41	exonic	nonsynonymous_SNV	NIBAN3	.	FAM129C:NM_001321826:exon5:c.G430C:p.D144H,FAM129C:NM_001321827:exon5:c.G430C:p.D144H,FAM129C:NM_001098524:exon6:c.G523C:p.D175H,FAM129C:NM_173544:exon6:c.G523C:p.D175H	.	.	19p13.11	.	.	.	.	.	.	NA	PASS	-10	.	0.054	0.958	0.799	0.535	1	2.015	2.24	-1.83	0.13	1.519	13.41	0.991	0.401	-1.073	0.071	0.706	1.43	0.992	5.871	Pleckstrin_homology_domain\x3bPleckstrin_homology-like_domain	34,7	0.156	34	7	0.156
BT474_Palbo_Res3	chr19_18921914_G_C	chr19	18921914	G	C	37	exonic	nonsynonymous_SNV	DDX49	.	DDX49:NM_019070:exon4:c.G397C:p.D133H	.	.	19p13.11	.	.	.	.	.	.	NA	PASS	-10	.	0.003	0.979	0.826	0	1	1.485	3.27	-6.42	0.963	5.661	26.7	0.996	0.971	-1.171	0.043	0.672	4.4	1.044	12.675	DEAD/DEAH_box_helicase_domain\x3bHelicase_superfamily_1/2,_ATP-binding_domain\x3bP-loop_containing_nucleoside_triphosphate_hydrolase	30,7	0.2	30	7	0.2
BT474_Palbo_Res3	chr19_43593294_C_G	chr19	43593294	C	G	64	exonic	nonsynonymous_SNV	IRGQ	.	IRGQ:NM_001007561:exon3:c.G604C:p.E202Q	.	.	19q13.31	.	.	.	.	.	.	NA	PASS	-10	.	0.125	0.999	0.976	0	0.923	2.095	0.6	-1.5	0.639	4.155	23.8	0.998	0.778	-0.682	0.291	0.672	5.14	0.852	11.389	.	45,17	0.251	45	17	0.251
BT474_Palbo_Res3	chr20_3237906_C_A	chr20	3237906	C	A	148	exonic	nonsynonymous_SNV	SLC4A11	.	SLC4A11:NM_001174090:exon1:c.G159T:p.W53C	.	.	20p13	.	.	.	.	.	.	NA	PASS	-10	.	0.026	0	0	.	1	0	-1.68	-0.09	0.066	1.411	12.85	0.685	0.067	-0.869	0.245	0.767	1.26	0.807	3.948	.	124,22	0.152	124	22	0.152
BT474_Palbo_Res3	chr20_57266007_G_C	chr20	57266007	G	C	458	exonic	nonsynonymous_SNV	BMP7	.	BMP7:NM_001719:exon1:c.C116G:p.S39W	.	.	20q13.31	.	.	.	.	.	.	NA	PASS	-10	.	0.001	1	1	0	1	2.74	-0.29	-3.34	0.843	6.841	33	0.992	0.99	0.221	0.541	0.652	5.04	0.998	18.385	Transforming_growth_factor-beta,_N-terminal	444,9	0.03	444	9	0.03
BT474_Palbo_Res3	chr20_58855125_C_T	chr20	58855125	C	T	299	exonic	nonsynonymous_SNV	GNAS	.	GNAS:NM_001077490:exon1:c.C1673T:p.S558L,GNAS:NM_001309883:exon1:c.C1673T:p.S558L	.	.	20q13.32	1.027e-05	.	.	.	.	.	NA	PASS	-10	.	0	.	.	.	1	.	.	-0.87	.	1.823	15.12	0.998	0.243	-0.983	0.109	0.652	1.88	0.852	5.882	.	264,26	0.088	264	26	0.088
BT474_Palbo_Res3	chr21_42653819_G_A	chr21	42653819	G	A	17	exonic	nonsynonymous_SNV	PDE9A	.	PDE9A:NM_001001567:exon1:c.G5A:p.G2E,PDE9A:NM_001001569:exon1:c.G5A:p.G2E,PDE9A:NM_001001570:exon1:c.G5A:p.G2E,PDE9A:NM_001001574:exon1:c.G5A:p.G2E,PDE9A:NM_001001578:exon1:c.G5A:p.G2E,PDE9A:NM_001001583:exon1:c.G5A:p.G2E,PDE9A:NM_002606:exon1:c.G5A:p.G2E	.	.	21q22.3	.	.	.	.	.	.	NA	PASS	-10	.	0	1	1	0.59	1	1.7	-1.48	-0.14	0.529	5.561	26.4	0.995	0.761	0.394	0.732	0.726	3.67	0.819	12.315	.	8,9	0.533	8	9	0.533
BT474_Palbo_Res3	chr22_42020007_G_C	chr22	42020007	G	C	77	exonic	nonsynonymous_SNV	WBP2NL	.	WBP2NL:NM_152613:exon4:c.G317C:p.G106A	.	.	22q13.2	.	.	.	.	.	.	NA	PASS	-10	.	0.002	1	0.983	0.009	1	1.92	0.08	-5.35	0.597	4.954	25	0.998	0.946	-0.387	0.329	0.554	3.97	1.048	12.487	WW-domain-binding_protein	67,8	0.12	67	8	0.12
BT474_Palbo_Res3	chr22_50548558_G_A	chr22	50548558	G	A	49	exonic	nonsynonymous_SNV	KLHDC7B	.	KLHDC7B:NM_138433:exon1:c.G392A:p.R131Q	.	.	22q13.33	.	.	.	.	.	.	NA	PASS	-10	.	0.009	0.998	0.457	.	0.946	0.895	-2.86	-1.05	0.479	4.469	24.2	0.999	0.376	-0.184	0.583	0.598	3.56	0.8	12.729	.	38,11	0.225	38	11	0.225
BT474_Palbo_Res3	chrX_88753886_G_A	chrX	88753886	G	A	43	exonic	nonsynonymous_SNV	CPXCR1	.	CPXCR1:NM_001184771:exon3:c.G472A:p.D158N,CPXCR1:NM_033048:exon3:c.G472A:p.D158N	.	.	Xq21.31	.	.	.	.	.	.	NA	PASS	-10	.	0.596	0.039	0.015	0.94	1	0	0.98	0.03	0.058	-0.572	0.146	0.426	0.005	-1.012	0.048	.	1.23	0.095	4.418	.	25,18	0.44	25	18	0.44
MCF7_Abe_Res1	chr1_190099080_G_T	chr1	190099080	G	T	71	exonic	nonsynonymous_SNV	BRINP3	.	BRINP3:NM_001317188:exon7:c.C933A:p.N311K,BRINP3:NM_199051:exon8:c.C1239A:p.N413K	.	.	1q31.1	.	.	.	.	.	.	NA	PASS	-10	.	0.011	0.998	0.992	0	1	1.895	0.67	-2.79	0.331	2.563	19.87	0.991	0.336	-0.628	0.218	0.487	-5.43	-0.232	15.139	Insulin-like_growth_factor_binding_protein,_N-terminal	47,23	0.315	47	23	0.315
MCF7_Abe_Res1	chr2_181919399_C_T	chr2	181919399	C	T	58	exonic	nonsynonymous_SNV	ITPRID2	.	SSFA2:NM_001287504:exon13:c.C2638T:p.L880F,SSFA2:NM_001130445:exon14:c.C3097T:p.L1033F,SSFA2:NM_001287503:exon14:c.C3097T:p.L1033F,SSFA2:NM_006751:exon14:c.C3097T:p.L1033F	.	.	2q31.3	.	.	.	.	.	.	NA	PASS	-10	.	0.092	0.069	0.063	0.063	0.999	0.895	1.12	-2.2	0.544	3.428	23	0.995	0.863	-1.062	0.091	0.707	5.09	0.007	14.403	Sperm-specific_antigen_2,_C-terminal	25,33	0.591	25	33	0.591
MCF7_Abe_Res1	chr2_229807735_AT_A	chr2	229807735	AT	A	28	exonic	frameshift_deletion	TRIP12	.	TRIP12:NM_001284216:exon14:c.1433delA:p.Y478Lfs*20,TRIP12:NM_001284215:exon16:c.2342delA:p.Y781Lfs*20,TRIP12:NM_001348316:exon16:c.2342delA:p.Y781Lfs*20,TRIP12:NM_001348317:exon16:c.2342delA:p.Y781Lfs*20,TRIP12:NM_001348318:exon16:c.2342delA:p.Y781Lfs*20,TRIP12:NM_001348331:exon16:c.2342delA:p.Y781Lfs*29,TRIP12:NM_004238:exon16:c.2324delA:p.Y775Lfs*29,TRIP12:NM_001284214:exon17:c.2468delA:p.Y823L…	.	.	2q36.3	.	.	.	.	.	.	NA	PASS	-10	.	.	.	.	.	.	.	.	.	.	.	.	.	.	.	.	.	.	.	.	.	0,28	0.953	0	28	0.953
MCF7_Abe_Res1	chr2_233713136_C_T	chr2	233713136	C	T	18	exonic	nonsynonymous_SNV	UGT1A5	.	UGT1A5:NM_019078:exon1:c.C145T:p.R49W	ID\x3dCOSM3407690\x3bOCCURENCE\x3d1(central_nervous_system)	0.000998403	2q37.1	0.0008	.	.	.	.	.	NA	PASS	-10	0.0012	0	0.994	0.832	0.946	1	1.995	-0.07	-2.99	0.188	4.379	24.1	0.995	0.143	-0.691	0.32	0.487	-0.894	-0.456	9.864	.	0,18	0.933	0	18	0.933
MCF7_Abe_Res1	chr3_46445436_C_A	chr3	46445436	C	A	27	exonic	nonsynonymous_SNV	LTF	.	LTF:NM_001199149:exon12:c.G1226T:p.G409V,LTF:NM_001321121:exon12:c.G1352T:p.G451V,LTF:NM_002343:exon12:c.G1358T:p.G453V,LTF:NM_001321122:exon15:c.G1319T:p.G440V	.	.	3p21.31	.	.	.	.	.	.	NA	PASS	-10	.	0.066	1	1	0.018	1	2.36	3.26	-6.63	0.858	4.501	24.3	0.995	0.735	-1.18	0.069	0.554	5.3	0.935	11.898	Transferrin-like_domain	16,11	0.391	16	11	0.391
MCF7_Abe_Res1	chr3_190308425_T_A	chr3	190308425	T	A	27	exonic	nonsynonymous_SNV	CLDN1	.	CLDN1:NM_021101:exon4:c.A488T:p.Q163L	ID\x3dCOSM1670778\x3bOCCURENCE\x3d1(breast)	.	3q28	.	.	.	.	.	.	NA	PASS	-10	.	0.014	0.004	0.01	0.019	0.73	1.3	-2.35	-1.5	0.525	4.228	23.9	0.985	0.597	-0.18	0.538	0.693	3.63	1.061	12.046	.	10,16	0.5	10	16	0.5
MCF7_Abe_Res1	chr4_139387885_C_A	chr4	139387885	C	A	32	exonic	nonsynonymous_SNV	NAA15	.	NAA15:NM_057175:exon20:c.C2402A:p.T801K	.	.	4q31.1	.	.	.	.	.	.	NA	PASS	-10	.	0.416	0.177	0.199	0	1	2.005	0.97	-1.52	0.694	1.777	14.85	0.914	0.947	-0.943	0.143	0.707	5.92	0.935	20.334	.	16,15	0.504	16	15	0.504
MCF7_Abe_Res1	chr5_177295082_C_A	chr5	177295082	C	A	201	exonic	nonsynonymous_SNV	NSD1	.	NSD1:NM_022455:exon23:c.C7714A:p.Q2572K,NSD1:NM_172349:exon24:c.C6907A:p.Q2303K	.	.	5q35.3	.	.	.	.	.	.	NA	PASS	-10	.	0.679	0	0.001	0.101	1	-0.46	-2.91	0.12	0.164	-0.488	0.235	0.526	0.007	-0.717	0.39	0.707	3.61	0.935	9.581	.	138,62	0.296	138	62	0.296
MCF7_Abe_Res1	chr13_23336903_C_A	chr13	23336903	C	A	30	exonic	stopgain	SACS	.	SACS:NM_001278055:exon8:c.G6532T:p.E2178X,SACS:NM_014363:exon10:c.G6973T:p.E2325X	.	.	13q12.12	.	.	.	.	.	.	NA	PASS	-10	.	.	.	.	0	1	.	.	.	.	13.166	41	0.997	0.962	.	.	0.745	5.93	0.935	20.351	Histidine_kinase-like_ATPase,_C-terminal_domain	9,20	0.667	9	20	0.667
MCF7_Abe_Res1	chr14_105250637_G_C	chr14	105250637	G	C	73	exonic	nonsynonymous_SNV	BTBD6	.	BTBD6:NM_033271:exon5:c.G1423C:p.G475R	.	.	14q32.33	.	.	.	.	.	.	NA	PASS	-10	.	0.022	1	1	0	1	1.665	-0.59	-5.15	0.937	5.776	27	0.999	0.992	-0.163	0.467	0.722	5.05	1.045	15.9	PHR	35,38	0.456	35	38	0.456
MCF7_Abe_Res1	chr16_24910450_C_G	chr16	24910450	C	G	62	exonic	nonsynonymous_SNV	SLC5A11	.	SLC5A11:NM_001258412:exon14:c.C1585G:p.Q529E,SLC5A11:NM_001258414:exon14:c.C1327G:p.Q443E,SLC5A11:NM_001258411:exon15:c.C1690G:p.Q564E,SLC5A11:NM_001258413:exon15:c.C1603G:p.Q535E,SLC5A11:NM_052944:exon15:c.C1795G:p.Q599E	.	.	16p12.1	.	.	.	.	.	.	NA	PASS	-10	.	1	0.006	0.005	0.845	1	1.78	0.03	0.26	0.179	-2.113	0.001	0.141	0.15	-0.925	0.185	0.554	3.52	0.036	9.085	.	36,26	0.377	36	26	0.377
MCF7_Abe_Res1	chr18_47594165_C_T	chr18	47594165	C	T	26	ncRNA_exonic	.	MIR4527HG	.	.	.	.	18q21.1	.	.	.	.	.	.	NA	PASS	-10	.	.	.	.	.	.	.	.	.	.	.	.	.	.	.	.	.	.	.	.	.	11,13	0.556	11	13	0.556
MCF7_Abe_Res1	chr18_58984206_G_A	chr18	58984206	G	A	18	exonic	nonsynonymous_SNV	ZNF532	.	ZNF532:NM_001318726:exon10:c.G3646A:p.V1216I,ZNF532:NM_001318727:exon10:c.G3646A:p.V1216I,ZNF532:NM_001318728:exon11:c.G3646A:p.V1216I,ZNF532:NM_018181:exon11:c.G3646A:p.V1216I	.	.	18q21.32	6.748e-05	.	.	.	.	.	NA	PASS	-10	.	0.488	0.332	0.044	0.001	0.722	0.075	1.63	-0.34	0.137	1.564	13.65	0.949	0.87	-1.089	0.046	0.707	5.84	1.043	19.738	Zinc_finger,_C2H2\x3bZinc_finger,_C2H2-like	6,12	0.6	6	12	0.6
MCF7_Abe_Res1	chr19_919578_G_T	chr19	919578	G	T	18	exonic	nonsynonymous_SNV	KISS1R	.	KISS1R:NM_032551:exon3:c.G458T:p.R153L	.	.	19p13.3	.	.	.	.	.	.	NA	PASS	-10	.	0.629	0.011	0.032	0.005	0.883	-0.01	-0.62	-2.42	0.242	4.138	23.8	0.931	0.813	-1.015	0.12	0.652	1.53	0.856	6.153	GPCR,_rhodopsin-like,_7TM	6,12	0.667	6	12	0.667
MCF7_Abe_Res1	chr19_10830234_C_T	chr19	10830234	C	T	26	exonic	nonsynonymous_SNV	DNM2	.	DNM2:NM_001005362:exon19:c.C2387T:p.A796V,DNM2:NM_004945:exon19:c.C2387T:p.A796V,DNM2:NM_001005360:exon20:c.C2399T:p.A800V,DNM2:NM_001005361:exon20:c.C2399T:p.A800V,DNM2:NM_001190716:exon20:c.C2399T:p.A800V	.	.	19p13.2	.	.	.	.	.	.	NA	PASS	-10	.	0.142	0.003	0.008	0.862	1	0.345	-3.06	-0.78	0.053	0.939	10.31	0.987	0.237	-0.379	0.538	0.672	3.11	0.847	6.879	.	5,18	0.778	5	18	0.778
MCF7_Abe_Res1	chr19_16975117_C_T	chr19	16975117	C	T	22	exonic	nonsynonymous_SNV	CPAMD8	.	CPAMD8:NM_015692:exon17:c.G2191A:p.D731N	.	.	19p13.11	.	.	.	.	.	.	NA	PASS	-10	.	0	1	0.996	0	0.92	2.28	1.15	0.25	0.317	6.877	33	0.999	0.919	0.388	0.547	0.615	2.78	0.692	13.816	.	9,12	0.524	9	12	0.524
MCF7_Abe_Res1	chr4_185677029_C_G	chr4	185677029	C	G	50	exonic	nonsynonymous_SNV	SORBS2	.	SORBS2:NM_001145673:exon5:c.G460C:p.A154P	.	.	4q35.1	.	.	.	.	.	.	NA	PASS	-10	.	0	0.002	0.004	.	1	0	0.92	0.91	0.157	2.025	16.37	0.947	0.702	-1.091	0.049	0.554	4.18	0.046	5.335	.	27,23	0.5	27	23	0.5
MCF7_Abe_Res1	chr5_143399908_A_C	chr5	143399908	A	C	33	exonic	nonsynonymous_SNV	NR3C1	.	NR3C1:NM_000176:exon2:c.T932G:p.I311R,NR3C1:NM_001018074:exon2:c.T932G:p.I311R,NR3C1:NM_001018075:exon2:c.T932G:p.I311R,NR3C1:NM_001018076:exon2:c.T932G:p.I311R,NR3C1:NM_001018077:exon2:c.T932G:p.I311R,NR3C1:NM_001020825:exon2:c.T932G:p.I311R,NR3C1:NM_001024094:exon2:c.T932G:p.I311R,NR3C1:NM_001204258:exon2:c.T854G:p.I285R,NR3C1:NM_001204259:exon2:c.T677G:p.I226R,NR3C1:NM_001204260:exon2:c.T665G:…	.	.	5q31.3	.	.	.	.	.	.	NA	PASS	-10	.	0.067	0.999	0.998	0	1	2.015	1.33	-0.62	0.52	0.806	9.499	0.987	0.819	-0.788	0.197	0.628	4.48	1.199	11.434	.	18,13	0.424	18	13	0.424
MCF7_Abe_Res1	chr1_70021088_G_C	chr1	70021088	G	C	20	exonic	nonsynonymous_SNV	LRRC7	.	LRRC7:NM_020794:exon14:c.G1390C:p.E464Q,LRRC7:NM_001350216:exon16:c.G1507C:p.E503Q,LRRC7:NM_001330635:exon17:c.G1405C:p.E469Q	.	.	1p31.1	.	.	.	.	.	.	NA	PASS	-10	.	0.024	0.997	0.986	0	1	0.55	0.95	-1.56	0.637	6.02	27.9	0.999	0.991	-0.947	0.123	0.487	5.66	1.048	18.732	.	11,8	0.353	11	8	0.353
MCF7_Abe_Res1	chr2_27329445_T_G	chr2	27329445	T	G	159	exonic	nonsynonymous_SNV	GTF3C2	.	GTF3C2:NM_001035521:exon13:c.A1811C:p.Y604S,GTF3C2:NM_001318909:exon13:c.A1844C:p.Y615S,GTF3C2:NM_001521:exon14:c.A1811C:p.Y604S	.	.	2p23.3	.	.	.	.	.	.	NA	PASS	-10	.	0.132	0.999	0.958	0	0.999	1.67	-0.71	-3.38	0.746	3.534	23.1	0.984	0.957	-0.417	0.407	0.707	4.71	0.143	11.004	WD40-repeat-containing_domain\x3bWD40/YVTN_repeat-like-containing_domain	148,10	0.062	148	10	0.062
MCF7_Abe_Res1	chr3_64621220_C_T	chr3	64621220	C	T	429	exonic	nonsynonymous_SNV	ADAMTS9	.	ADAMTS9:NM_001318781:exon18:c.G2623A:p.V875I,ADAMTS9:NM_182920:exon19:c.G2707A:p.V903I	.	.	3p14.1	.	.	.	.	.	.	NA	PASS	-10	.	0.464	0.003	0.006	0.04	0.653	1.155	0.15	-0.28	0.102	2.027	16.38	0.97	0.187	-1.034	0.124	0.707	2.22	0.892	9.674	.	412,9	0.025	412	9	0.025
MCF7_Abe_Res1	chr3_195780987_G_GGTGGATACTGAGGAAGTGTCGGTGACAGGAAGAGGGGTGGCGTGACCGGTGGATGCCGAGGAAGCGTCGGTGACAGGAAGAGGGGTGGTGTCACCTGTGGATACTGAGGAAAAGCTGGTGACAGGAAGAGGGGTGGCGTGACCT	chr3	195780987	G	GGTGGATACTGAGGAAGTGTCGGTGACAGGAAGAGGGGTGGCGTGACCGGTGGATGCCGAGGAAGCGTCGGTGACAGGAAGAGGGGTGGTGTCACCTGTGGATACTGAGGAAAAGCTGGTGACAGGAAGAGGGGTGGCGTGACCT	351	exonic	nonframeshift_insertion	MUC4	.	MUC4:NM_018406:exon2:c.10592_10593insAGGTCACGCCACCCCTCTTCCTGTCACCAGCTTTTCCTCAGTATCCACAGGTGACACCACCCCTCTTCCTGTCACCGACGCTTCCTCGGCATCCACCGGTCACGCCACCCCTCTTCCTGTCACCGACACTTCCTCAGTATCCAC:p.S3532_C5387delinsGHATPLPVTSFSSVSTGDTTPLPVTDASSASTGHATPLPVTDTSSVSTSASTGHTTPLHVTIPSSASTGDTSTLPVTGASSASTGHATPLPVTDTSSVSTGHATPLPVTSLSSVSTGDTTPLPVTDASSASTGQATPLPVTSLSSVSTGDTTPLLVTDASSVSTGHATPLPVTDTSSASTGDTTRLPVTDTSSASTGQ…	.	.	3q29	0.0894	.	.	.	.	.	NA	PASS	-10	.	.	.	.	.	.	.	.	.	.	.	.	.	.	.	.	.	.	.	.	.	61290	0.995	61	290	0.995
MCF7_Abe_Res1	chr4_39253187_G_T	chr4	39253187	G	T	26	exonic	nonsynonymous_SNV	WDR19	.	WDR19:NM_001317924:exon24:c.G2291T:p.W764L,WDR19:NM_025132:exon25:c.G2771T:p.W924L	.	.	4p14	.	.	.	.	.	.	NA	PASS	-10	.	0.657	0.03	0.02	0	1	1.335	-0.69	-3.17	0.793	3.109	22.5	0.95	0.991	-0.747	0.264	0.706	5.49	1.044	19.383	Tetratricopeptide-like_helical_domain	18,8	0.364	18	8	0.364
MCF7_Abe_Res1	chr4_56298329_G_A	chr4	56298329	G	A	32	exonic	nonsynonymous_SNV	CRACD	.	KIAA1211:NM_020722:exon4:c.G100A:p.G34S	.	.	4q12	9.478e-06	.	.	.	.	.	NA	PASS	-10	.	0.014	0.998	0.981	.	1	1.75	2.22	-2.99	0.587	5.041	25.2	0.995	0.954	-0.381	0.284	0.615	4.5	1.048	16.399	.	14,18	0.565	14	18	0.565
MCF7_Abe_Res1	chr5_140834787_CGACACAAA_C	chr5	140834787	CGACACAAA	C	553	exonic	frameshift_deletion	PCDHA7	.	PCDHA7:NM_018910:exon1:c.405_412del:p.T136Efs*11,PCDHA7:NM_031852:exon1:c.405_412del:p.T136Efs*11	.	.	5q31.3	.	.	.	.	.	.	NA	PASS	-10	.	.	.	.	.	.	.	.	.	.	.	.	.	.	.	.	.	.	.	.	.	502,41	0.075	502	41	0.075
MCF7_Abe_Res1	chr5_141053360_G_T	chr5	141053360	G	T	86	exonic	nonsynonymous_SNV	PCDHB1	.	PCDHB1:NM_013340:exon1:c.G1890T:p.Q630H	.	.	5q31.3	.	.	.	.	.	.	NA	PASS	-10	.	0.021	0.002	0.004	0.065	1	0.425	0.65	-1.3	0.203	0.192	4.595	0.992	0.088	-0.964	0.095	0.487	4.24	0.127	17.497	Cadherin\x3bCadherin-like	62,19	0.268	62	19	0.268
MCF7_Abe_Res1	chr6_70199707_C_G	chr6	70199707	C	G	16	exonic	nonsynonymous_SNV	COL19A1	.	COL19A1:NM_001858:exon49:c.C3194G:p.P1065R	.	.	6q13	.	.	.	.	.	.	NA	PASS	-10	.	.	1	0.998	0	1	2.565	.	.	0.706	4.903	24.9	0.996	0.956	0.899	0.921	0.476	5.91	0.935	20.301	.	9,6	0.332	9	6	0.332
MCF7_Abe_Res1	chr6_144461276_G_C	chr6	144461276	G	C	18	exonic	nonsynonymous_SNV	UTRN	.	UTRN:NM_007124:exon21:c.G2787C:p.K929N	.	.	6q24.2	.	.	.	.	.	.	NA	PASS	-10	.	0.033	0.611	0.103	0.05	1	0.895	0.04	-2.58	0.098	2.007	16.25	0.996	0.747	-1.067	0.065	0.707	0.811	0.953	10.127	.	11,6	0.357	11	6	0.357
MCF7_Abe_Res1	chr7_47940272_C_T	chr7	47940272	C	T	38	exonic	nonsynonymous_SNV	PKD1L1	.	PKD1L1:NM_138295:exon3:c.G206A:p.G69D	.	.	7p12.3	.	.	.	.	.	.	NA	PASS	-10	.	0.076	0	0	.	1	0	1.71	-0.72	0.128	-0.897	0.026	0.882	0.013	-1.011	0.024	0.52	-2.06	-0.371	0.487	.	26,11	0.285	26	11	0.285
MCF7_Abe_Res1	chr7_126446119_G_A	chr7	126446119	G	A	65	exonic	nonsynonymous_SNV	GRM8	.	GRM8:NM_001127323:exon10:c.C2684T:p.S895L	.	.	7q31.33	.	.	.	.	.	.	NA	PASS	-10	.	0.003	0	0.001	.	1	0.345	-2.47	-1.4	0.119	1.677	14.28	0.999	0.881	-0.366	0.458	0.554	5.83	0.998	12.426	.	49,15	0.216	49	15	0.216
MCF7_Abe_Res1	chr9_133554376_A_C	chr9	133554376	A	C	32	exonic	nonsynonymous_SNV	ADAMTSL2	.	ADAMTSL2:NM_001145320:exon10:c.A959C:p.K320T,ADAMTSL2:NM_014694:exon10:c.A959C:p.K320T	.	.	9q34.2	.	.	.	.	.	.	NA	PASS	-10	.	0.024	0.539	0.518	0.041	0.947	1.425	0.7	-3.14	0.591	3.651	23.2	0.994	0.86	-0.903	0.129	0.422	-3.35	-0.146	12.375	ADAM-TS_Spacer_1	22,8	0.25	22	8	0.25
MCF7_Abe_Res1	chr10_96157028_T_C	chr10	96157028	T	C	32	exonic	nonsynonymous_SNV	ZNF518A	.	ZNF518A:NM_001278525:exon6:c.T706C:p.C236R,ZNF518A:NM_001330732:exon6:c.T706C:p.C236R,ZNF518A:NM_001330735:exon6:c.T706C:p.C236R,ZNF518A:NM_001330736:exon6:c.T706C:p.C236R,ZNF518A:NM_014803:exon6:c.T706C:p.C236R,ZNF518A:NM_001278524:exon7:c.T706C:p.C236R,ZNF518A:NM_001330733:exon7:c.T706C:p.C236R,ZNF518A:NM_001330734:exon7:c.T706C:p.C236R,ZNF518A:NM_001330737:exon7:c.T706C:p.C236R,ZNF518A:NM_0013…	.	.	10q24.1	.	.	.	.	.	.	NA	PASS	-10	.	.	1	0.998	.	.	3.925	.	.	0.897	0.76	9.213	0.896	0.981	.	.	0.156	5.55	1.011	14.656	Zinc_finger,_C2H2\x3bZinc_finger,_C2H2-like	17,15	0.481	17	15	0.481
MCF7_Abe_Res1	chr11_4546037_T_C	chr11	4546037	T	C	41	exonic	nonsynonymous_SNV	OR52M1	.	OR52M1:NM_001004137:exon1:c.T847C:p.Y283H	.	.	11p15.4	.	.	.	.	.	.	NA	PASS	-10	.	0.01	1	0.999	0.001	0.736	2.11	8.11	-4.85	0.817	5.14	25.4	0.998	0.978	-0.942	0.002	0.487	4.5	1.058	8.455	GPCR,_rhodopsin-like,_7TM	33,6	0.187	33	6	0.187
MCF7_Abe_Res1	chr11_4924174_T_A	chr11	4924174	T	A	69	exonic	nonsynonymous_SNV	OR51G1	.	OR51G1:NM_001005237:exon1:c.A166T:p.T56S	.	.	11p15.4	.	.	.	.	.	.	NA	PASS	-10	.	1	0	0.002	0.024	1	-1.885	8.96	1.77	0.094	-1.434	0.003	0.628	0.164	-1.004	0	0.487	2.99	0.134	9.016	GPCR,_rhodopsin-like,_7TM	42,25	0.42	42	25	0.42
MCF7_Abe_Res1	chr13_31150184_T_A	chr13	31150184	T	A	45	splicing	.	HSPH1	NM_006644:exon8:c.909-2A>T\x3bNM_001286503:exon8:c.909-2A>T\x3bNM_001349704:exon8:c.909-2A>T\x3bNM_001286504:exon8:c.915-2A>T\x3bNM_001286505:exon6:c.681-2A>T	.	.	.	13q12.3	.	.	.	.	.	.	NA	PASS	-10	.	.	.	.	.	1	.	.	.	.	3.879	23.5	0.991	0.995	.	.	0.099	5.51	0.913	15.633	.	37,8	0.2	37	8	0.2
MCF7_Abe_Res1	chr15_48234955_C_A	chr15	48234955	C	A	111	exonic	nonsynonymous_SNV	SLC12A1	.	SLC12A1:NM_000338:exon9:c.C1166A:p.P389Q,SLC12A1:NM_001184832:exon9:c.C1166A:p.P389Q	.	.	15q21.1	.	.	.	.	.	.	NA	PASS	-10	.	0	1	1	0	1	4.14	-5.17	-7.42	0.944	6.617	32	0.994	0.986	1.032	0.984	0.487	5.32	0.935	19.364	Amino_acid_permease/_SLC12A_domain	85,25	0.206	85	25	0.206
MCF7_Abe_Res1	chr15_48742100_C_A	chr15	48742100	C	A	49	exonic	nonsynonymous_SNV	CEP152	.	CEP152:NM_014985:exon24:c.G3668T:p.C1223F,CEP152:NM_001194998:exon25:c.G3836T:p.C1279F	.	.	15q21.1	.	.	.	.	.	.	NA	PASS	-10	.	0.122	0.61	0.086	0.001	0.881	0	0.71	-0.61	0.121	3.448	23	0.955	0.978	-1.04	0.059	0.706	4.98	-0.328	11.337	.	33,15	0.333	33	15	0.333
MCF7_Abe_Res1	chr15_83897897_G_A	chr15	83897897	G	A	119	exonic	nonsynonymous_SNV	ADAMTSL3	.	ADAMTSL3:NM_001301110:exon14:c.G1507A:p.V503I,ADAMTSL3:NM_207517:exon14:c.G1507A:p.V503I	.	.	15q25.2	.	.	.	.	.	.	NA	PASS	-10	.	0.004	0.999	0.996	0	1	2.175	0.59	-0.65	0.524	6.46	29.9	0.999	0.988	-0.32	0.354	0.554	5.24	0.953	18.851	.	84,33	0.278	84	33	0.278
MCF7_Abe_Res1	chr15_101818657_G_T	chr15	101818657	G	T	50	exonic	nonsynonymous_SNV	OR4F15	.	OR4F15:NM_001001674:exon1:c.G471T:p.L157F	.	.	15q26.3	.	.	.	.	.	.	NA	PASS	-10	.	0.037	0.014	0.03	0.575	1	1.37	8.35	-1.86	0.122	3.324	22.9	0.998	0.065	-0.949	0.001	0.487	1.48	1.044	1.732	GPCR,_rhodopsin-like,_7TM	35,11	0.256	35	11	0.256
MCF7_Abe_Res1	chr16_1079733_G_A	chr16	1079733	G	A	53	exonic	nonsynonymous_SNV	SSTR5	.	SSTR5:NM_001053:exon1:c.G865A:p.V289M,SSTR5:NM_001172560:exon2:c.G865A:p.V289M	.	.	16p13.3	9.445e-06	.	.	.	.	.	NA	PASS	-10	.	0.015	0.961	0.633	0.023	1	2.585	-0.66	-1.74	0.278	4.217	23.9	0.998	0.853	-0.072	0.421	0.554	4.76	0.953	12.286	GPCR,_rhodopsin-like,_7TM	38,13	0.268	38	13	0.268
MCF7_Abe_Res1	chr16_1656442_C_T	chr16	1656442	C	T	62	exonic	nonsynonymous_SNV	CRAMP1	.	CRAMP1:NM_020825:exon9:c.C1685T:p.P562L	.	.	16p13.3	.	.	.	.	.	.	NA	PASS	-10	.	0	0.412	0.104	0	1	1.04	.	-2.6	0.674	5.646	26.6	0.999	0.972	-0.879	0.135	0.696	4.07	0.852	13.265	.	50,12	0.216	50	12	0.216
MCF7_Abe_Res1	chr16_29841916_G_A	chr16	29841916	G	A	22	exonic	nonsynonymous_SNV	MVP	.	MVP:NM_001293204:exon9:c.G1438A:p.V480M,MVP:NM_005115:exon10:c.G1438A:p.V480M,MVP:NM_017458:exon10:c.G1438A:p.V480M	ID\x3dCOSM1678978\x3bOCCURENCE\x3d1(large_intestine)	.	16p11.2	1.898e-05	.	.	.	.	.	NA	PASS	-10	.	0.001	0.999	0.875	0	1	3.21	0.8	-2.86	0.771	6.237	28.8	0.999	0.95	-0.226	0.328	0.707	4.74	1.048	12.662	.	12,10	0.429	12	10	0.429
MCF7_Abe_Res1	chr17_18285230_C_T	chr17	18285230	C	T	112	exonic	nonsynonymous_SNV	TOP3A	.	TOP3A:NM_001320759:exon14:c.G1504A:p.D502N,TOP3A:NM_004618:exon15:c.G1789A:p.D597N	.	.	17p11.2	.	.	.	.	.	.	NA	PASS	-10	.	0.014	0.033	0.063	0	1	1.1	2.02	-2.68	0.052	5.285	25.7	0.994	0.989	-1.112	0.053	0.719	5.4	0.886	19.167	DNA_topoisomerase,_type_IA,_central\x3bDNA_topoisomerase,_type_IA,_central_region,_subdomain_1\x3bDNA_topoisomerase,_type_IA,_core_domain	60,51	0.437	60	51	0.437
MCF7_Abe_Res1	chr17_68929560_C_A	chr17	68929560	C	A	27	splicing	.	ABCA8	NM_001288985:exon8:c.939+1G>T\x3bNM_007168:exon7:c.939+1G>T\x3bNM_001288986:exon7:c.939+1G>T	.	.	.	17q24.2	.	.	.	.	.	.	NA	PASS	-10	.	.	.	.	.	1	.	.	.	.	4.027	23.6	0.986	0.939	.	.	0.054	3.87	0.935	12.055	.	20,7	0.227	20	7	0.227
MCF7_Abe_Res1	chr18_58536910_C_G	chr18	58536910	C	G	35	exonic	nonsynonymous_SNV	ALPK2	.	ALPK2:NM_052947:exon5:c.G3277C:p.E1093Q	.	.	18q21.31	.	.	.	.	.	.	NA	PASS	-10	.	0.28	0.707	0.148	0.709	1	0.345	0.75	-0.38	0.05	0.24	5.097	0.724	0.219	-1.091	0.065	0.554	3.13	-0.414	8.458	.	18,17	0.467	18	17	0.467
MCF7_Abe_Res1	chr19_8959917_G_T	chr19	8959917	G	T	134	exonic	stopgain	MUC16	.	MUC16:NM_024690:exon3:c.C16853A:p.S5618X	.	.	19p13.2	.	.	.	.	.	.	NA	PASS	-10	.	.	.	.	.	1	.	.	.	.	11.568	37	0.959	0.016	.	.	0.487	0.616	0.623	3.871	.	118,14	0.126	118	14	0.126
MCF7_Abe_Res1	chr19_40611302_G_A	chr19	40611302	G	A	27	exonic	nonsynonymous_SNV	LTBP4	.	LTBP4:NM_001042545:exon13:c.G1961A:p.C654Y,LTBP4:NM_001042544:exon16:c.G2162A:p.C721Y,LTBP4:NM_003573:exon16:c.G2051A:p.C684Y	.	.	19q13.2	1.05e-05	.	.	.	.	.	NA	PASS	-10	.	0.005	0.999	0.998	0.001	1	4.11	-5.91	-7.32	0.693	4.897	24.9	0.986	0.898	0.983	0.99	0.741	5.27	0.953	15.79	Complement_Clr-like_EGF_domain\x3bEGF-like_calcium-binding_domain\x3bEGF-like_calcium-binding,_conserved_site\x3bEGF-like,_conserved_site\x3bEpidermal_growth_factor-like_domain\x3bInsulin-like_growth_factor_binding_protein,_N-terminal	20,7	0.25	20	7	0.25
MCF7_Abe_Res1	chr20_47310102_T_C	chr20	47310102	T	C	751	exonic	nonsynonymous_SNV	ZMYND8	.	ZMYND8:NM_001281769:exon3:c.A188G:p.K63R,ZMYND8:NM_001281771:exon3:c.A188G:p.K63R,ZMYND8:NM_001281775:exon3:c.A188G:p.K63R,ZMYND8:NM_001281776:exon3:c.A188G:p.K63R,ZMYND8:NM_001281777:exon3:c.A188G:p.K63R,ZMYND8:NM_001281778:exon3:c.A188G:p.K63R,ZMYND8:NM_001281781:exon3:c.A188G:p.K63R,ZMYND8:NM_001281782:exon3:c.A188G:p.K63R,ZMYND8:NM_001281783:exon3:c.A188G:p.K63R,ZMYND8:NM_001281784:exon3:c.A1…	.	.	20q13.12	1.883e-05	.	.	.	.	.	NA	PASS	-10	.	0.066	1	0.998	0	0.999	1.04	0.95	-1.38	0.596	5.755	27	0.999	0.939	-0.902	0.178	0.722	5.55	1.061	15.718	Zinc_finger,_FYVE/PHD-type	717,14	0.02	717	14	0.02
MCF7_Abe_Res1	chr20_47349879_G_T	chr20	47349879	G	T	829	exonic	stopgain	ZMYND8	.	ZMYND8:NM_001281772:exon3:c.C11A:p.S4X	.	.	20q13.12	.	.	.	.	.	.	NA	PASS	-10	.	.	.	.	.	1	.	.	.	.	1.796	14.97	0.983	0.083	.	.	0.394	1.02	0.953	8.674	.	814,6	0.012	814	6	0.012
MCF7_Abe_Res1	chr20_52160158_G_C	chr20	52160158	G	C	28	exonic	nonsynonymous_SNV	ZFP64	.	ZFP64:NM_022088:exon4:c.C566G:p.S189C,ZFP64:NM_018197:exon5:c.C728G:p.S243C,ZFP64:NM_199426:exon5:c.C722G:p.S241C,ZFP64:NM_199427:exon5:c.C728G:p.S243C	.	.	20q13.2	.	.	.	.	.	.	NA	PASS	-10	.	0.106	1	0.999	0	1	2.525	2.33	-1.42	0.759	5.743	26.9	0.995	0.994	-0.726	0.239	0.707	6.17	1.048	20.879	Zinc_finger_C2H2-type/integrase_DNA-binding_domain\x3bZinc_finger,_C2H2\x3bZinc_finger,_C2H2-like	21,6	0.2	21	6	0.2
MCF7_Abe_Res1	chr21_46126112_A_G	chr21	46126112	A	G	167	exonic	nonsynonymous_SNV	COL6A2	.	COL6A2:NM_001849:exon26:c.A2297G:p.K766R,COL6A2:NM_058174:exon26:c.A2297G:p.K766R,COL6A2:NM_058175:exon26:c.A2297G:p.K766R	.	.	21q22.3	.	.	.	.	.	.	NA	PASS	-10	.	0.567	0	0.001	0.523	1	-0.235	-1.71	-0.47	0.069	0.472	7.216	0.906	0.067	-0.904	0.231	0.696	-2.68	-0.258	6.773	von_Willebrand_factor,_type_A	154,6	0.033	154	6	0.033
MCF7_Abe_Res1	chr22_50285851_C_T	chr22	50285851	C	T	22	exonic	nonsynonymous_SNV	PLXNB2	.	PLXNB2:NM_012401:exon11:c.G2037A:p.M679I	.	.	22q13.33	2.846e-05	.	.	.	.	.	NA	PASS	-10	.	0.024	0.012	0.013	0.012	0.994	1.995	4.05	-0.43	0.253	3.063	22.4	0.991	0.575	-1.042	0.016	0.672	4.9	0.852	13.578	.	11,11	0.445	11	11	0.445
MCF7_Abe_Res2	chr1_224183363_C_A	chr1	224183363	C	A	27	exonic	nonsynonymous_SNV	DEGS1	.	DEGS1:NM_001321541:exon1:c.C27A:p.D9E,DEGS1:NM_003676:exon1:c.C27A:p.D9E	ID\x3dCOSM425419\x3bOCCURENCE\x3d1(breast),1(large_intestine)	0.000998403	1q42.11	0.001	.	.	.	.	.	NA	PASS	-10	0.0017	0.119	0.051	0.12	0	1	1.79	0.26	-2.59	0.105	2.658	20.6	0.986	0.607	-0.979	0.119	0.442	0.859	-0.066	6.637	Sphingolipid_delta4-desaturase,_N-terminal	1,26	0.913	1	26	0.913
MCF7_Abe_Res2	chr2_170714165_A_C	chr2	170714165	A	C	38	ncRNA_exonic	.	LINC01124	.	.	.	.	2q31.1	.	.	.	.	.	.	NA	PASS	-10	.	.	.	.	.	.	.	.	.	.	.	.	.	.	.	.	.	.	.	.	.	1,37	0.931	1	37	0.931
MCF7_Abe_Res2	chr2_178543854_G_T	chr2	178543854	G	T	19	exonic	nonsynonymous_SNV	TTN	.	TTN:NM_003319:exon174:c.C69095A:p.T23032K,TTN:NM_133432:exon175:c.C69470A:p.T23157K,TTN:NM_133437:exon175:c.C69671A:p.T23224K,TTN:NM_133378:exon295:c.C88586A:p.T29529K,TTN:NM_001256850:exon296:c.C91367A:p.T30456K,TTN:NM_001267550:exon346:c.C96290A:p.T32097K	.	.	2q31.2	.	.	.	.	.	.	NA	PASS	-10	.	0.089	1	0.986	.	1	2.255	-0.17	-4.11	0.589	3.208	22.7	0.895	0.976	-0.117	0.469	0.476	6.07	1.048	20.659	Fibronectin_type_III\x3bImmunoglobulin_I-set\x3bImmunoglobulin_subtype\x3bImmunoglobulin-like_domain\x3bImmunoglobulin-like_fold	7,12	0.667	7	12	0.667
MCF7_Abe_Res2	chr2_181919399_C_T	chr2	181919399	C	T	42	exonic	nonsynonymous_SNV	ITPRID2	.	SSFA2:NM_001287504:exon13:c.C2638T:p.L880F,SSFA2:NM_001130445:exon14:c.C3097T:p.L1033F,SSFA2:NM_001287503:exon14:c.C3097T:p.L1033F,SSFA2:NM_006751:exon14:c.C3097T:p.L1033F	.	.	2q31.3	.	.	.	.	.	.	NA	PASS	-10	.	0.092	0.069	0.063	0.063	0.999	0.895	1.12	-2.2	0.544	3.428	23	0.995	0.863	-1.062	0.091	0.707	5.09	0.007	14.403	Sperm-specific_antigen_2,_C-terminal	11,31	0.686	11	31	0.686
MCF7_Abe_Res2	chr2_205727900_C_T	chr2	205727900	C	T	58	exonic	nonsynonymous_SNV	NRP2	.	NRP2:NM_003872:exon7:c.C1000T:p.R334C,NRP2:NM_018534:exon7:c.C1000T:p.R334C,NRP2:NM_201264:exon7:c.C1000T:p.R334C,NRP2:NM_201266:exon7:c.C1000T:p.R334C,NRP2:NM_201267:exon7:c.C1000T:p.R334C,NRP2:NM_201279:exon7:c.C1000T:p.R334C	.	0.000399361	2q33.3	0.0013	.	.	.	.	.	NA	PASS	-10	0.0023	0.014	1	0.971	0	1	2.555	-4.81	-1.96	0.657	7.627	35	0.999	0.959	1.096	0.959	0.732	5.03	0.935	15.056	Coagulation_factor_5/8_C-terminal_type_domain\x3bGalactose-binding_domain-like	1,57	0.956	1	57	0.956
MCF7_Abe_Res2	chr2_208335340_C_G	chr2	208335340	C	G	16	exonic	nonsynonymous_SNV	PIKFYVE	.	PIKFYVE:NM_015040:exon25:c.C4177G:p.P1393A	.	.	2q34	.	.	.	.	.	.	NA	PASS	-10	.	0.096	0.999	0.994	0	1	1.815	0.21	-5.04	0.801	4.597	24.4	0.995	0.99	-0.268	0.412	0.732	5.59	0.935	19.186	.	5,11	0.615	5	11	0.615
MCF7_Abe_Res2	chr2_226797760_G_A	chr2	226797760	G	A	21	exonic	nonsynonymous_SNV	IRS1	.	IRS1:NM_005544:exon1:c.C979T:p.R327C	ID\x3dCOSM1669810\x3bOCCURENCE\x3d1(breast)	.	2q36.3	.	.	.	.	.	.	NA	PASS	-10	.	0	1	0.999	0	1	2.22	-0.26	-6.79	0.877	6.364	29.4	0.999	0.863	0.002	0.501	0.696	5.66	1.048	19.737	.	0,21	0.947	0	21	0.947
MCF7_Abe_Res2	chr2_233682539_T_C	chr2	233682539	T	C	42	exonic	nonsynonymous_SNV	UGT1A7	.	UGT1A7:NM_019077:exon1:c.T602C:p.M201T	.	.	2q37.1	3.766e-05	.	.	.	.	.	NA	PASS	-10	0.0002	0	0.988	0.925	.	1	3.935	-0.08	-5.77	0.58	3.856	23.5	0.981	0.997	0.501	0.609	0.487	4.3	0.913	13.653	.	0,41	0.966	0	41	0.966
MCF7_Abe_Res2	chr9_2717817_C_A	chr9	2717817	C	A	64	exonic	nonsynonymous_SNV	KCNV2	.	KCNV2:NM_133497:exon1:c.C78A:p.H26Q	.	.	9p24.2	.	.	.	.	.	.	NA	PASS	-10	.	0.016	0.002	0.001	0.8	1	0.975	-4.21	-0.93	0.101	-0.492	0.23	0.942	0.3	-0.027	0.76	0.554	1.88	0.892	6.744	.	19,43	0.698	19	43	0.698
MCF7_Abe_Res2	chr11_18724158_T_C	chr11	18724158	T	C	44	exonic	nonsynonymous_SNV	IGSF22	.	IGSF22:NM_173588:exon2:c.A79G:p.T27A	.	0.000599042	11p15.1	0.0028	.	.	.	.	.	NA	PASS	-10	0.0026	0.038	0.39	0.108	0.001	0.999	0.345	0.73	-0.55	0.174	2.696	20.8	0.989	0.653	-1.032	0.062	0.609	3.44	1.061	11.524	.	1,42	0.949	1	42	0.949
MCF7_Abe_Res2	chr11_19351019_C_T	chr11	19351019	C	T	41	exonic	stopgain	NAV2	.	NAV2:NM_001111018:exon1:c.C67T:p.Q23X	.	.	11p15.1	.	.	.	.	.	.	NA	PASS	-10	.	.	.	.	.	1	.	.	.	.	11.858	38	0.998	0.951	.	.	0.516	5.83	0.935	19.733	Calponin_homology_domain	17,24	0.586	17	24	0.586
MCF7_Abe_Res2	chr11_126407024_G_GT	chr11	126407024	G	GT	17	splicing	.	ST3GAL4	NM_001348398:exon4:c.170+1->T\x3bNM_001254757:exon4:c.182+1->T\x3bNM_001348396:exon5:c.245+1->T\x3bNM_001348400:exon4:c.170+1->T\x3bNM_001348397:exon5:c.245+1->T\x3bNM_006278:exon4:c.170+1->T\x3bNM_001348399:exon4:c.182+1->T\x3bNM_001254758:exon4:c.182+1->T\x3bNM_001254759:exon2:c.179+1->T	.	.	.	11q24.2	.	.	.	.	.	.	NA	PASS	-10	.	.	.	.	.	.	.	.	.	.	.	.	.	.	.	.	.	.	.	.	.	8,7	0.499	8	7	0.499
MCF7_Abe_Res2	chr18_58984206_G_A	chr18	58984206	G	A	32	exonic	nonsynonymous_SNV	ZNF532	.	ZNF532:NM_001318726:exon10:c.G3646A:p.V1216I,ZNF532:NM_001318727:exon10:c.G3646A:p.V1216I,ZNF532:NM_001318728:exon11:c.G3646A:p.V1216I,ZNF532:NM_018181:exon11:c.G3646A:p.V1216I	.	.	18q21.32	6.748e-05	.	.	.	.	.	NA	PASS	-10	.	0.488	0.332	0.044	0.001	0.722	0.075	1.63	-0.34	0.137	1.564	13.65	0.949	0.87	-1.089	0.046	0.707	5.84	1.043	19.738	Zinc_finger,_C2H2\x3bZinc_finger,_C2H2-like	14,18	0.556	14	18	0.556
MCF7_Abe_Res2	chr18_63897787_G_T	chr18	63897787	G	T	19	exonic	stopgain	SERPINB2	.	SERPINB2:NM_002575:exon5:c.G478T:p.E160X,SERPINB2:NM_001143818:exon6:c.G478T:p.E160X	ID\x3dCOSM1680402\x3bOCCURENCE\x3d1(breast)	.	18q21.33	.	.	.	.	.	.	NA	PASS	-10	.	.	.	.	0.469	1	.	.	.	.	10.119	36	0.995	0.151	.	.	0.693	1.74	1.048	5.686	Serpin_domain	7,11	0.625	7	11	0.625
MCF7_Abe_Res2	chr19_10830234_C_T	chr19	10830234	C	T	28	exonic	nonsynonymous_SNV	DNM2	.	DNM2:NM_001005362:exon19:c.C2387T:p.A796V,DNM2:NM_004945:exon19:c.C2387T:p.A796V,DNM2:NM_001005360:exon20:c.C2399T:p.A800V,DNM2:NM_001005361:exon20:c.C2399T:p.A800V,DNM2:NM_001190716:exon20:c.C2399T:p.A800V	.	.	19p13.2	.	.	.	.	.	.	NA	PASS	-10	.	0.142	0.003	0.008	0.862	1	0.345	-3.06	-0.78	0.053	0.939	10.31	0.987	0.237	-0.379	0.538	0.672	3.11	0.847	6.879	.	3,23	0.85	3	23	0.85
MCF7_Abe_Res2	chr19_12897848_G_C	chr19	12897848	G	C	53	exonic	nonsynonymous_SNV	GCDH	.	GCDH:NM_000159:exon11:c.G1228C:p.V410L,GCDH:NM_013976:exon11:c.G1228C:p.V410L	.	.	19p13.13	.	.	.	.	.	.	NA	PASS	-10	.	0.001	1	0.999	0	1	2.54	-3.69	-2.83	0.891	6.321	29.2	0.998	0.994	1.048	0.925	0.707	5.75	1.048	17.436	Acyl-CoA_dehydrogenase/oxidase_C-terminal	29,24	0.434	29	24	0.434
MCF7_Abe_Res2	chr1_1142887_C_T	chr1	1142887	C	T	24	ncRNA_exonic	.	LINC01342	.	.	.	.	1p36.33	.	.	.	.	.	.	NA	PASS	-10	.	.	.	.	.	.	.	.	.	.	.	.	.	.	.	.	.	.	.	.	.	16,8	0.368	16	8	0.368
MCF7_Abe_Res2	chr1_119941731_A_C	chr1	119941731	A	C	79	exonic	nonsynonymous_SNV	NOTCH2	.	NOTCH2:NM_001200001:exon18:c.T2776G:p.C926G,NOTCH2:NM_024408:exon18:c.T2776G:p.C926G	.	.	1p12	.	.	.	.	.	.	NA	PASS	-10	.	0	1	0.999	0.001	1	4.86	-12.4	-10.51	0.997	5.255	25.6	0.987	0.993	1.587	1	0.706	6.08	1.14	15.832	EGF-like_calcium-binding_domain\x3bEGF-like_calcium-binding,_conserved_site\x3bEpidermal_growth_factor-like_domain	69,10	0.164	69	10	0.164
MCF7_Abe_Res2	chr1_151103636_G_A	chr1	151103636	G	A	105	exonic	nonsynonymous_SNV	GABPB2	.	GABPB2:NM_001323913:exon5:c.G529A:p.E177K,GABPB2:NM_001323906:exon6:c.G697A:p.E233K,GABPB2:NM_001323908:exon6:c.G697A:p.E233K,GABPB2:NM_144618:exon6:c.G697A:p.E233K,GABPB2:NM_001323910:exon7:c.G745A:p.E249K	.	.	1q21.3	.	.	.	.	.	.	NA	PASS	-10	.	0.069	0.982	0.952	0.107	1	0.805	0.25	-1.16	0.45	2.671	20.6	0.996	0.938	-0.972	0.132	0.638	3.33	0.004	8.316	.	87,14	0.171	87	14	0.171
MCF7_Abe_Res2	chr1_156846059_C_T	chr1	156846059	C	T	58	exonic	nonsynonymous_SNV	INSRR	.	INSRR:NM_014215:exon9:c.G1871A:p.R624H	.	.	1q23.1	.	.	.	.	.	.	NA	PASS	-10	.	0.004	1	0.939	0	1	.	-0.64	-2.46	0.508	6.981	33	1	0.837	-0.022	0.457	0.598	4.74	0.935	15.602	Fibronectin_type_III\x3bImmunoglobulin-like_fold	39,17	0.325	39	17	0.325
MCF7_Abe_Res2	chr1_201208351_C_T	chr1	201208351	C	T	229	exonic	nonsynonymous_SNV	IGFN1	.	IGFN1:NM_001164586:exon12:c.C3458T:p.P1153L	.	.	1q32.1	.	.	.	.	.	.	NA	PASS	-10	.	0	.	.	.	1	0	-2.3	-2.97	0.039	3.919	23.5	0.991	0.161	-0.335	0.425	0.487	3.97	0.852	14.319	Immunoglobulin-like_domain	187,36	0.159	187	36	0.159
MCF7_Abe_Res2	chr1_243165613_G_C	chr1	243165613	G	C	31	exonic	nonsynonymous_SNV	CEP170	.	CEP170:NM_001042404:exon12:c.C2053G:p.Q685E,CEP170:NM_001042405:exon12:c.C2053G:p.Q685E,CEP170:NM_014812:exon13:c.C2347G:p.Q783E	.	.	1q43	.	.	.	.	.	.	NA	PASS	-10	.	0.039	0.51	0.228	0.013	1	0.55	0.98	-0.85	0.144	-0.984	0.017	0.954	0.771	-1.084	0.064	0.732	5.25	0.993	11.266	.	19,11	0.428	19	11	0.428
MCF7_Abe_Res2	chr2_33252806_G_C	chr2	33252806	G	C	84	exonic	nonsynonymous_SNV	LTBP1	.	LTBP1:NM_000627:exon7:c.G1151C:p.W384S,LTBP1:NM_001166264:exon7:c.G1151C:p.W384S,LTBP1:NM_001166265:exon7:c.G1151C:p.W384S,LTBP1:NM_001166266:exon7:c.G1151C:p.W384S,LTBP1:NM_206943:exon11:c.G2129C:p.W710S	.	.	2p22.3	.	.	.	.	.	.	NA	PASS	-10	.	0.001	1	1	.	1	3.26	-4.34	-13.43	0.905	6.672	32	0.992	0.991	1.081	0.977	0.707	5.58	1.048	19.582	TB_domain	65,18	0.222	65	18	0.222
MCF7_Abe_Res2	chr2_96023128_GC_TA	chr2	96023128	GC	TA	40	exonic	nonframeshift_substitution	GPAT2	.	GPAT2:NM_001321529:exon18:c.1931_1932delinsTA:p.R644L,GPAT2:NM_001321530:exon18:c.1913_1914delinsTA:p.R638L,GPAT2:NM_001321525:exon19:c.2144_2145delinsTA:p.R715L,GPAT2:NM_001321526:exon19:c.2144_2145delinsTA:p.R715L,GPAT2:NM_001321527:exon19:c.2144_2145delinsTA:p.R715L,GPAT2:NM_001321528:exon19:c.2134_2135delinsTA:p.A712Y,GPAT2:NM_207328:exon19:c.2126_2127delinsTA:p.R709L	.	.	2q11.2	.	.	.	.	.	.	NA	PASS	-10	.	.	.	.	.	.	.	.	.	.	.	.	.	.	.	.	.	.	.	.	.	23,16	0.429	23	16	0.429
MCF7_Abe_Res2	chr2_131044377_G_A	chr2	131044377	G	A	55	exonic	nonsynonymous_SNV	ARHGEF4	.	ARHGEF4:NM_032995:exon11:c.G1678A:p.G560R,ARHGEF4:NM_015320:exon12:c.G1678A:p.G560R	.	.	2q21.1	2.285e-05	.	.	.	.	.	NA	PASS	-10	.	0	1	1	0	1	2.86	-2.49	-7.79	0.83	6.862	33	0.999	0.902	-0.143	0.418	0.718	4.31	0.974	12.844	Dbl_homology_(DH)_domain\x3bPleckstrin_homology_domain\x3bPleckstrin_homology-like_domain	30,22	0.476	30	22	0.476
MCF7_Abe_Res2	chr2_178746085_T_G	chr2	178746085	T	G	37	exonic	nonsynonymous_SNV	TTN	.	TTN:NM_133379:exon46:c.A16315C:p.K5439Q	.	.	2q31.2	.	.	.	.	.	.	NA	PASS	-10	.	0.588	0.928	0.408	.	1	1.02	-0.26	0.31	0.149	0.57	7.946	0.895	0.972	-0.816	0.196	0.554	6.07	1.061	11.676	Immunoglobulin_I-set\x3bImmunoglobulin_subtype\x3bImmunoglobulin-like_domain\x3bImmunoglobulin-like_fold	14,22	0.552	14	22	0.552
MCF7_Abe_Res2	chr2_229785842_C_T	chr2	229785842	C	T	21	exonic	nonsynonymous_SNV	TRIP12	.	TRIP12:NM_001284216:exon31:c.G3974A:p.R1325Q,TRIP12:NM_001284215:exon33:c.G4883A:p.R1628Q,TRIP12:NM_001348316:exon33:c.G4883A:p.R1628Q,TRIP12:NM_001348317:exon33:c.G4868A:p.R1623Q,TRIP12:NM_001348318:exon33:c.G4868A:p.R1623Q,TRIP12:NM_001348331:exon33:c.G4787A:p.R1596Q,TRIP12:NM_004238:exon33:c.G4784A:p.R1595Q,TRIP12:NM_001284214:exon34:c.G4928A:p.R1643Q,TRIP12:NM_001348315:exon34:c.G4928A:p.R164…	ID\x3dCOSM1306517\x3bOCCURENCE\x3d1(urinary_tract)	.	2q36.3	.	.	.	.	.	.	NA	PASS	-10	.	0	0.998	0.945	0	1	2.605	-0.01	-3.41	0.974	8.192	35	1	0.981	0.009	0.472	0.707	5.36	0.892	19.452	HECT	0,21	0.941	0	21	0.941
MCF7_Abe_Res2	chr3_64603952_A_C	chr3	64603952	A	C	1256	exonic	nonsynonymous_SNV	ADAMTS9	.	ADAMTS9:NM_001318781:exon24:c.T3633G:p.C1211W,ADAMTS9:NM_182920:exon25:c.T3717G:p.C1239W	.	.	3p14.1	.	.	.	.	.	.	NA	PASS	-10	.	0.001	1	0.999	0	1	4.485	-5.12	-10.14	0.981	5.761	27	0.994	0.863	0.342	0.631	0.563	4.06	0.229	8.894	.	1193,25	0.02	1193	25	0.02
MCF7_Abe_Res2	chr3_97532543_AG_A	chr3	97532543	AG	A	108	splicing	.	EPHA6	NM_001080448:exon11:c.2386+1G>-\x3bNM_001278300:exon8:c.562+1G>-\x3bNM_173655:exon9:c.562+1G>-	.	.	.	3q11.2	.	.	.	.	.	.	NA	PASS	-10	.	.	.	.	.	.	.	.	.	.	.	.	.	.	.	.	.	.	.	.	.	80,26	0.241	80	26	0.241
MCF7_Abe_Res2	chr3_111567526_C_G	chr3	111567526	C	G	21	exonic	nonsynonymous_SNV	CD96	.	CD96:NM_001318889:exon3:c.C422G:p.T141R,CD96:NM_005816:exon3:c.C422G:p.T141R,CD96:NM_198196:exon3:c.C422G:p.T141R	.	.	3q13.13	.	.	.	.	.	.	NA	PASS	-10	.	0.019	0.95	0.735	0.705	1	0.55	-0.14	-1.64	0.165	-0.468	0.263	0.95	0.052	-0.874	0.208	0.554	0.53	-0.327	7.534	Immunoglobulin-like_fold	15,6	0.357	15	6	0.357
MCF7_Abe_Res2	chr3_185473260_G_T	chr3	185473260	G	T	119	exonic	nonsynonymous_SNV	MAP3K13	.	MAP3K13:NM_001242317:exon10:c.G1308T:p.Q436H,MAP3K13:NM_004721:exon11:c.G1929T:p.Q643H,MAP3K13:NM_001242314:exon12:c.G1929T:p.Q643H	.	.	3q27.2	.	.	.	.	.	.	NA	PASS	-10	.	0.319	0.001	0.002	0	1	-0.55	0.95	-0.96	0.296	-0.429	0.329	0.775	0.209	-1.056	0.033	0.554	-3.92	-0.241	6.634	Protein_kinase-like_domain	81,36	0.315	81	36	0.315
MCF7_Abe_Res2	chr3_195780987_G_GGTGGATACTGAGGAAGTGTCGGTGACAGGAAGAGGGGTGGCGTGACCGGTGGATGCCGAGGAAGCGTCGGTGACAGGAAGAGGGGTGGTGTCACCTGTGGATACTGAGGAAAAGCTGGTGACAGGAAGAGGGGTGGCGTGACCT	chr3	195780987	G	GGTGGATACTGAGGAAGTGTCGGTGACAGGAAGAGGGGTGGCGTGACCGGTGGATGCCGAGGAAGCGTCGGTGACAGGAAGAGGGGTGGTGTCACCTGTGGATACTGAGGAAAAGCTGGTGACAGGAAGAGGGGTGGCGTGACCT	286	exonic	nonframeshift_insertion	MUC4	.	MUC4:NM_018406:exon2:c.10592_10593insAGGTCACGCCACCCCTCTTCCTGTCACCAGCTTTTCCTCAGTATCCACAGGTGACACCACCCCTCTTCCTGTCACCGACGCTTCCTCGGCATCCACCGGTCACGCCACCCCTCTTCCTGTCACCGACACTTCCTCAGTATCCAC:p.S3532_C5387delinsGHATPLPVTSFSSVSTGDTTPLPVTDASSASTGHATPLPVTDTSSVSTSASTGHTTPLHVTIPSSASTGDTSTLPVTGASSASTGHATPLPVTDTSSVSTGHATPLPVTSLSSVSTGDTTPLPVTDASSASTGQATPLPVTSLSSVSTGDTTPLLVTDASSVSTGHATPLPVTDTSSASTGDTTRLPVTDTSSASTGQ…	.	.	3q29	0.0894	.	.	.	.	.	NA	PASS	-10	.	.	.	.	.	.	.	.	.	.	.	.	.	.	.	.	.	.	.	.	.	50236	0.994	50	236	0.994
MCF7_Abe_Res2	chr4_67581411_C_G	chr4	67581411	C	G	45	exonic	nonsynonymous_SNV	STAP1	.	STAP1:NM_001317769:exon5:c.C470G:p.S157C,STAP1:NM_012108:exon5:c.C470G:p.S157C	.	.	4q13.2	.	.	.	.	.	.	NA	PASS	-10	.	0.023	0.008	0.008	0.144	1	1.1	0.82	-0.86	0.154	1.235	11.93	0.693	0.271	-1.003	0.097	0.628	3.78	0.931	8.992	.	38,7	0.171	38	7	0.171
MCF7_Abe_Res2	chr5_35759697_G_C	chr5	35759697	G	C	66	exonic	nonsynonymous_SNV	SPEF2	.	SPEF2:NM_024867:exon25:c.G3598C:p.D1200H	.	.	5p13.2	.	.	.	.	.	.	NA	PASS	-10	.	0.012	0.992	0.826	0.569	0.842	1.845	1.51	-1.62	0.143	4.761	24.7	0.994	0.984	-0.907	0.164	0.487	5.18	1.048	17.845	.	58,6	0.093	58	6	0.093
MCF7_Abe_Res2	chr5_73909649_A_T	chr5	73909649	A	T	20	exonic	nonsynonymous_SNV	ARHGEF28	.	ARHGEF28:NM_001244364:exon26:c.A3460T:p.T1154S,ARHGEF28:NM_001080479:exon34:c.A4399T:p.T1467S,ARHGEF28:NM_001177693:exon34:c.A4399T:p.T1467S	.	.	5q13.2	.	.	.	.	.	.	NA	PASS	-10	.	0.561	0.007	0.016	0.009	0.999	0	2.01	0.18	0.073	2.377	18.67	0.982	0.938	-1.002	0.027	0.563	5.21	0.089	11.193	Pleckstrin_homology_domain\x3bPleckstrin_homology-like_domain	11,7	0.293	11	7	0.293
MCF7_Abe_Res2	chr5_93585276_G_T	chr5	93585276	G	T	143	exonic	stopgain	NR2F1	.	NR2F1:NM_005654:exon1:c.G253T:p.E85X	.	.	5q15	.	.	.	.	.	.	NA	PASS	-10	.	.	.	.	0.001	1	.	.	.	.	11.978	38	0.996	0.89	.	.	0.437	2.26	0.787	9.971	Zinc_finger,_NHR/GATA-type\x3bZinc_finger,_nuclear_hormone_receptor-type	104,37	0.257	104	37	0.257
MCF7_Abe_Res2	chr6_30910031_C_A	chr6	30910031	C	A	24	exonic	nonsynonymous_SNV	GTF2H4	.	GTF2H4:NM_001517:exon4:c.C342A:p.F114L	.	.	6p21.33	.	.	.	.	.	.	NA	PASS	-10	.	0.004	0.999	0.944	0	1	3.08	0.04	-5.68	0.899	6.462	29.9	0.998	0.897	-0.234	0.357	0.707	4.74	0.892	8.605	.	16,7	0.368	16	7	0.368
MCF7_Abe_Res2	chr6_70199707_C_G	chr6	70199707	C	G	20	exonic	nonsynonymous_SNV	COL19A1	.	COL19A1:NM_001858:exon49:c.C3194G:p.P1065R	.	.	6q13	.	.	.	.	.	.	NA	PASS	-10	.	.	1	0.998	0	1	2.565	.	.	0.706	4.903	24.9	0.996	0.956	0.899	0.921	0.476	5.91	0.935	20.301	.	14,6	0.353	14	6	0.353
MCF7_Abe_Res2	chr6_112100700_C_G	chr6	112100700	C	G	50	exonic	nonsynonymous_SNV	FAM229B	.	FAM229B:NM_001033564:exon4:c.C156G:p.C52W	.	.	6q21	.	.	.	.	.	.	NA	PASS	-10	.	0	0.999	0.995	0	1	.	.	-11	0.975	4.713	24.6	0.988	0.553	-0.527	0.261	0.742	3.41	0.931	7.191	.	24,25	0.5	24	25	0.5
MCF7_Abe_Res2	chr7_92221976_G_C	chr7	92221976	G	C	110	exonic	nonsynonymous_SNV	KRIT1	.	KRIT1:NM_001013406:exon12:c.C1345G:p.L449V,KRIT1:NM_001350669:exon12:c.C1345G:p.L449V,KRIT1:NM_001350672:exon12:c.C1489G:p.L497V,KRIT1:NM_001350691:exon12:c.C1489G:p.L497V,KRIT1:NM_001350695:exon12:c.C1489G:p.L497V,KRIT1:NM_001350670:exon13:c.C1345G:p.L449V,KRIT1:NM_001350671:exon13:c.C775G:p.L259V,KRIT1:NM_001350673:exon13:c.C1489G:p.L497V,KRIT1:NM_001350677:exon13:c.C1489G:p.L497V,KRIT1:NM_0013…	.	.	7q21.2	.	.	.	.	.	.	NA	PASS	-10	.	0.46	0.988	0.952	0	1	1.155	1.05	-0.06	0.758	0.745	9.12	0.992	0.861	-0.733	0.287	0.707	1.95	0.157	9.834	Band_4.1_domain\x3bFERM_domain	91,18	0.171	91	18	0.171
MCF7_Abe_Res2	chr8_70661186_G_GTTAGAATGTGAACAATAAGAGCACCTACCTCACAGTATCC	chr8	70661186	G	GTTAGAATGTGAACAATAAGAGCACCTACCTCACAGTATCC	19	ncRNA_exonic	.	LACTB2-AS1	.	.	.	.	8q13.3	.	.	.	.	.	.	NA	PASS	-10	.	.	.	.	.	.	.	.	.	.	.	.	.	.	.	.	.	.	.	.	.	13,6	0.437	13	6	0.437
MCF7_Abe_Res2	chr9_87651721_C_A	chr9	87651721	C	A	115	exonic	nonsynonymous_SNV	DAPK1	.	DAPK1:NM_001288729:exon17:c.C1821A:p.N607K,DAPK1:NM_001288730:exon17:c.C1821A:p.N607K,DAPK1:NM_001288731:exon17:c.C1821A:p.N607K,DAPK1:NM_004938:exon17:c.C1821A:p.N607K	.	.	9q21.33	.	.	.	.	.	.	NA	PASS	-10	.	0.004	0.998	0.998	0	1	3.51	2.37	-2.77	0.511	7.066	33	0.998	0.958	-0.737	0.162	0.719	5.1	0.935	10.36	Ankyrin_repeat-containing_domain	66,45	0.358	66	45	0.358
MCF7_Abe_Res2	chr10_12087553_GCCACCAA_G	chr10	12087553	GCCACCAA	G	185	exonic	frameshift_deletion	DHTKD1	.	DHTKD1:NM_018706:exon4:c.542_548del:p.A181Gfs*5	.	.	10p14	.	.	.	.	.	.	NA	PASS	-10	.	.	.	.	.	.	.	.	.	.	.	.	.	.	.	.	.	.	.	.	.	141,39	0.233	141	39	0.233
MCF7_Abe_Res2	chr10_84237633_G_T	chr10	84237633	G	T	24	exonic	nonsynonymous_SNV	LRIT1	.	LRIT1:NM_015613:exon2:c.C176A:p.P59Q	.	.	10q23.1	.	.	.	.	.	.	NA	PASS	-10	.	0.074	0.019	0.035	0.404	1	0.805	0.56	0.4	0.139	2.555	19.82	0.932	0.331	-1.006	0.094	0.526	3.38	0.077	7.447	Leucine-rich_repeat-containing_N-terminal	15,9	0.333	15	9	0.333
MCF7_Abe_Res2	chr11_47179242_C_T	chr11	47179242	C	T	194	exonic	nonsynonymous_SNV	PACSIN3	.	PACSIN3:NM_001184974:exon8:c.G817A:p.E273K,PACSIN3:NM_001184975:exon8:c.G817A:p.E273K,PACSIN3:NM_016223:exon8:c.G817A:p.E273K	.	.	11p11.2	.	.	.	.	.	.	NA	PASS	-10	.	0.928	0.001	0.001	0.021	0.883	0.235	0.88	0.18	0.271	0.965	10.46	0.632	0.336	-1.089	0.055	0.707	4.27	0.935	8.137	.	160,31	0.167	160	31	0.167
MCF7_Abe_Res2	chr11_55914514_C_T	chr11	55914514	C	T	22	exonic	nonsynonymous_SNV	OR5W2	.	OR5W2:NM_001001960:exon1:c.G69A:p.M23I	.	.	11q12.1	.	.	.	.	.	.	NA	PASS	-10	.	0.174	0	0.001	0.459	1	-0.095	5.15	-0.2	0.069	-1.605	0.002	0.728	0.007	-0.893	0.003	0.487	-10	-1.703	5.935	.	10,12	0.579	10	12	0.579
MCF7_Abe_Res2	chr12_10598163_G_C	chr12	10598163	G	C	14	ncRNA_exonic	.	KLRA1P	.	.	.	.	12p13.2	.	.	.	.	.	.	NA	PASS	-10	.	.	.	.	.	.	.	.	.	.	.	.	.	.	.	.	.	.	.	.	.	5,8	0.548	5	8	0.548
MCF7_Abe_Res2	chr12_53383011_C_T	chr12	53383011	C	T	103	exonic	nonsynonymous_SNV	SP1	.	SP1:NM_001251825:exon3:c.C920T:p.T307I,SP1:NM_003109:exon3:c.C1043T:p.T348I,SP1:NM_138473:exon3:c.C1064T:p.T355I	.	.	12q13.13	.	.	.	.	.	.	NA	PASS	-10	.	0.184	0.005	0.007	0.002	0.975	1.1	3.16	0.25	0.475	3.174	22.7	0.994	0.786	-1.04	0.02	0.722	3.48	0.892	11.459	.	62,38	0.335	62	38	0.335
MCF7_Abe_Res2	chr12_77024091_C_T	chr12	77024091	C	T	72	exonic	nonsynonymous_SNV	E2F7	.	E2F7:NM_203394:exon13:c.G2660A:p.R887K	.	.	12q21.2	.	.	.	.	.	.	NA	PASS	-10	.	0.489	0.012	0.004	0.004	1	0.205	2.51	0.01	0.062	1.963	15.98	0.945	0.703	-1.01	0.015	0.707	3.37	0.07	5.724	.	51,20	0.264	51	20	0.264
MCF7_Abe_Res2	chr12_88166559_G_T	chr12	88166559	G	T	26	exonic	nonsynonymous_SNV	TMTC3	.	TMTC3:NM_181783:exon7:c.G1027T:p.D343Y	.	.	12q21.32	.	.	.	.	.	.	NA	PASS	-10	.	0.038	0.012	0.059	0.003	0.993	1.23	-0.08	-0.73	0.35	3.59	23.2	0.987	0.932	-0.887	0.162	0.707	2.28	0.902	9.14	.	17,9	0.304	17	9	0.304
MCF7_Abe_Res2	chr12_129700016_G_C	chr12	129700016	G	C	109	exonic	nonsynonymous_SNV	TMEM132D	.	TMEM132D:NM_133448:exon2:c.C762G:p.H254Q	.	.	12q24.33	.	.	.	.	.	.	NA	PASS	-10	.	0.573	0.012	0.013	0.98	1	0.35	2.85	0.39	0.033	-0.84	0.035	0.707	0.073	-0.92	0.016	0.615	1.4	0.029	4.643	.	82,26	0.28	82	26	0.28
MCF7_Abe_Res2	chr12_131296846_C_T	chr12	131296846	C	T	62	ncRNA_exonic	.	LINC02415	.	.	.	.	12q24.33	.	.	.	.	.	.	NA	PASS	-10	0.0005	.	.	.	.	.	.	.	.	.	.	.	.	.	.	.	.	.	.	.	.	51,9	0.213	51	9	0.213
MCF7_Abe_Res2	chr14_32821999_GA_CT	chr14	32821999	GA	CT	97	exonic	nonframeshift_substitution	AKAP6	.	AKAP6:NM_004274:exon13:c.4186_4187delinsCT:p.E1396L	.	.	14q12	.	.	.	.	.	.	NA	PASS	-10	.	.	.	.	.	.	.	.	.	.	.	.	.	.	.	.	.	.	.	.	.	76,18	0.21	76	18	0.21
MCF7_Abe_Res2	chr17_3030988_G_T	chr17	3030988	G	T	27	exonic	nonsynonymous_SNV	RAP1GAP2	.	RAP1GAP2:NM_001100398:exon22:c.G2129T:p.S710I,RAP1GAP2:NM_001330058:exon23:c.G2117T:p.S706I,RAP1GAP2:NM_015085:exon23:c.G2174T:p.S725I	.	.	17p13.3	.	.	.	.	.	.	NA	PASS	-10	.	0.001	0.573	0.219	0	0.858	0.805	-2.65	-1.31	0.371	4.967	25.1	0.99	0.977	0.243	0.549	0.707	4.35	1.025	12.612	.	16,11	0.36	16	11	0.36
MCF7_Abe_Res2	chr17_76291151_CGTGGGGAAACTAGAACTCATTCTACGCA_C	chr17	76291151	CGTGGGGAAACTAGAACTCATTCTACGCA	C	169	exonic	frameshift_deletion	QRICH2	.	QRICH2:NM_032134:exon4:c.3050_3077del:p.L1017Rfs*8	.	.	17q25.1	.	.	.	.	.	.	NA	PASS	-10	.	.	.	.	.	.	.	.	.	.	.	.	.	.	.	.	.	.	.	.	.	151,13	0.078	151	13	0.078
MCF7_Abe_Res2	chr19_38612618_G_A	chr19	38612618	G	A	33	exonic	nonsynonymous_SNV	MAP4K1	.	MAP4K1:NM_001042600:exon9:c.C658T:p.P220S,MAP4K1:NM_007181:exon9:c.C658T:p.P220S	.	.	19q13.2	.	.	.	.	.	.	NA	PASS	-10	.	0	1	0.999	0	1	1.215	-0.05	-7.54	0.795	5.468	26.2	0.999	0.987	-0.316	0.338	0.672	4.21	0.953	15.349	Protein_kinase_domain\x3bProtein_kinase-like_domain\x3bSerine/threonine/dual_specificity_protein_kinase,_catalytic__domain	21,11	0.346	21	11	0.346
MCF7_Abe_Res2	chr22_20733805_A_G	chr22	20733805	A	G	62	exonic	nonsynonymous_SNV	PI4KA	.	PI4KA:NM_058004:exon35:c.T4091C:p.V1364A	.	.	22q11.21	.	.	.	.	.	.	NA	PASS	-10	.	.	0.063	0.05	0	1	1.405	-1.04	.	0.732	1.974	16.05	0.992	0.987	-0.728	0.27	0.732	5.04	1.028	14.763	.	41,21	0.354	41	21	0.354
MCF7_Abe_Res3	chr1_157515750_G_T	chr1	157515750	G	T	127	exonic	nonsynonymous_SNV	FCRL5	.	FCRL5:NM_001195388:exon17:c.C2849A:p.S950Y	.	.	1q23.1	.	.	.	.	.	.	NA	PASS	-10	.	.	.	.	.	.	.	.	.	.	.	.	.	.	.	.	.	.	.	.	.	88,35	0.298	88	35	0.298
MCF7_Abe_Res3	chr3_46445436_C_A	chr3	46445436	C	A	33	exonic	nonsynonymous_SNV	LTF	.	LTF:NM_001199149:exon12:c.G1226T:p.G409V,LTF:NM_001321121:exon12:c.G1352T:p.G451V,LTF:NM_002343:exon12:c.G1358T:p.G453V,LTF:NM_001321122:exon15:c.G1319T:p.G440V	.	.	3p21.31	.	.	.	.	.	.	NA	PASS	-10	.	0.066	1	1	0.018	1	2.36	3.26	-6.63	0.858	4.501	24.3	0.995	0.735	-1.18	0.069	0.554	5.3	0.935	11.898	Transferrin-like_domain	16,16	0.464	16	16	0.464
MCF7_Abe_Res3	chr3_190308425_T_A	chr3	190308425	T	A	51	exonic	nonsynonymous_SNV	CLDN1	.	CLDN1:NM_021101:exon4:c.A488T:p.Q163L	ID\x3dCOSM1670778\x3bOCCURENCE\x3d1(breast)	.	3q28	.	.	.	.	.	.	NA	PASS	-10	.	0.014	0.004	0.01	0.019	0.73	1.3	-2.35	-1.5	0.525	4.228	23.9	0.985	0.597	-0.18	0.538	0.693	3.63	1.061	12.046	.	22,24	0.525	22	24	0.525
MCF7_Abe_Res3	chr5_148086454_G_C	chr5	148086454	G	C	87	exonic	nonsynonymous_SNV	SPINK5	.	SPINK5:NM_001127698:exon5:c.G332C:p.C111S,SPINK5:NM_001127699:exon5:c.G332C:p.C111S,SPINK5:NM_006846:exon5:c.G332C:p.C111S	.	.	5q32	.	.	.	.	.	.	NA	PASS	-10	.	0	1	0.999	0.001	0.813	4.41	-6.5	-5.86	0.957	1.269	12.11	0.972	0.829	0.891	0.993	0.615	4.6	0.98	13.648	Kazal_domain	59,24	0.317	59	24	0.317
MCF7_Abe_Res3	chr13_27273298_C_G	chr13	27273298	C	G	125	exonic	nonsynonymous_SNV	RASL11A	.	RASL11A:NM_001331126:exon4:c.C407G:p.T136S,RASL11A:NM_206827:exon4:c.C533G:p.T178S	.	.	13q12.2	.	.	.	.	.	.	NA	PASS	-10	.	0.061	0.437	0.241	0	1	0	-1	-0.98	0.517	5.818	27.2	0.992	0.997	-0.57	0.245	0.624	5.67	0.935	19.767	P-loop_containing_nucleoside_triphosphate_hydrolase\x3bSmall_GTP-binding_protein_domain	62,58	0.511	62	58	0.511
MCF7_Abe_Res3	chr16_1066515_C_T	chr16	1066515	C	T	12	ncRNA_exonic	.	SSTR5-AS1	.	.	.	.	16p13.3	.	.	.	.	.	.	NA	PASS	-10	.	.	.	.	.	.	.	.	.	.	.	.	.	.	.	.	.	.	.	.	.	2,9	0.698	2	9	0.698
MCF7_Abe_Res3	chr16_24910450_C_G	chr16	24910450	C	G	51	exonic	nonsynonymous_SNV	SLC5A11	.	SLC5A11:NM_001258412:exon14:c.C1585G:p.Q529E,SLC5A11:NM_001258414:exon14:c.C1327G:p.Q443E,SLC5A11:NM_001258411:exon15:c.C1690G:p.Q564E,SLC5A11:NM_001258413:exon15:c.C1603G:p.Q535E,SLC5A11:NM_052944:exon15:c.C1795G:p.Q599E	.	.	16p12.1	.	.	.	.	.	.	NA	PASS	-10	.	1	0.006	0.005	0.845	1	1.78	0.03	0.26	0.179	-2.113	0.001	0.141	0.15	-0.925	0.185	0.554	3.52	0.036	9.085	.	30,20	0.411	30	20	0.411
MCF7_Abe_Res3	chr17_8141818_G_A	chr17	8141818	G	A	17	exonic	nonsynonymous_SNV	PER1	.	PER1:NM_002616:exon22:c.C3587T:p.A1196V	.	0.000399361	17p13.1	0.0006	.	.	.	.	.	NA	PASS	-10	0.0008	0.138	0.235	0.19	0	1	1.525	2.4	-2.54	0.497	6.501	31	0.999	0.931	-1.092	0.041	0.672	4.7	1.048	8.724	Period_circadian-like,_C-terminal	0,17	0.937	0	17	0.937
MCF7_Abe_Res3	chr19_919578_G_T	chr19	919578	G	T	40	exonic	nonsynonymous_SNV	KISS1R	.	KISS1R:NM_032551:exon3:c.G458T:p.R153L	.	.	19p13.3	.	.	.	.	.	.	NA	PASS	-10	.	0.629	0.011	0.032	0.005	0.883	-0.01	-0.62	-2.42	0.242	4.138	23.8	0.931	0.813	-1.015	0.12	0.652	1.53	0.856	6.153	GPCR,_rhodopsin-like,_7TM	21,19	0.484	21	19	0.484
MCF7_Abe_Res3	chr19_12897848_G_C	chr19	12897848	G	C	62	exonic	nonsynonymous_SNV	GCDH	.	GCDH:NM_000159:exon11:c.G1228C:p.V410L,GCDH:NM_013976:exon11:c.G1228C:p.V410L	.	.	19p13.13	.	.	.	.	.	.	NA	PASS	-10	.	0.001	1	0.999	0	1	2.54	-3.69	-2.83	0.891	6.321	29.2	0.998	0.994	1.048	0.925	0.707	5.75	1.048	17.436	Acyl-CoA_dehydrogenase/oxidase_C-terminal	39,23	0.388	39	23	0.388
MCF7_Abe_Res3	chrX_31774124_C_G	chrX	31774124	C	G	35	exonic	nonsynonymous_SNV	DMD	.	DMD:NM_004011:exon23:c.G3355C:p.E1119Q,DMD:NM_004012:exon23:c.G3346C:p.E1116Q,DMD:NM_000109:exon51:c.G7354C:p.E2452Q,DMD:NM_004006:exon51:c.G7378C:p.E2460Q,DMD:NM_004009:exon51:c.G7366C:p.E2456Q,DMD:NM_004010:exon51:c.G7009C:p.E2337Q	.	.	Xp21.1	.	.	.	.	.	.	NA	PASS	-10	.	0.33	0.925	0.519	0.002	1	0.805	3.95	-0.45	0.214	4.019	23.6	0.99	0.971	-0.861	0.193	.	5.08	0.935	17.654	.	0,35	0.964	0	35	0.964
MCF7_Abe_Res3	chr3_12941656_C_A	chr3	12941656	C	A	89	exonic	nonsynonymous_SNV	IQSEC1	.	IQSEC1:NM_001134382:exon2:c.G233T:p.R78L,IQSEC1:NM_014869:exon2:c.G275T:p.R92L	.	.	3p25.2	.	.	.	.	.	.	NA	PASS	-10	.	0.001	0.5	0.084	0	1	.	-1.3	-4.29	0.427	7.345	34	0.997	0.989	-0.358	0.344	0.632	3.28	0.848	13.475	.	54,30	0.344	54	30	0.344
MCF7_Abe_Res3	chr4_185677029_C_G	chr4	185677029	C	G	52	exonic	nonsynonymous_SNV	SORBS2	.	SORBS2:NM_001145673:exon5:c.G460C:p.A154P	.	.	4q35.1	.	.	.	.	.	.	NA	PASS	-10	.	0	0.002	0.004	.	1	0	0.92	0.91	0.157	2.025	16.37	0.947	0.702	-1.091	0.049	0.554	4.18	0.046	5.335	.	32,19	0.381	32	19	0.381
MCF7_Abe_Res3	chr22_36523264_T_G	chr22	36523264	T	G	24	exonic	nonsynonymous_SNV	EIF3D	.	EIF3D:NM_003753:exon6:c.A410C:p.Q137P	.	.	22q12.3	.	.	.	.	.	.	NA	PASS	-10	.	0.278	0.993	0.88	0	1	0.69	.	-1.76	0.792	3.093	22.5	0.995	0.981	-0.755	0.228	0.707	5.91	1.061	16.01	.	8,16	0.632	8	16	0.632
MCF7_Abe_Res3	chr1_13370731_CAG_C	chr1	13370731	CAG	C	84	exonic	frameshift_deletion	PRAMEF19	.	PRAMEF19:NM_001099790:exon2:c.782_783del:p.S261Cfs*46	.	.	1p36.21	.	.	.	.	.	.	NA	PASS	-10	.	.	.	.	.	.	.	.	.	.	.	.	.	.	.	.	.	.	.	.	.	68,12	0.135	68	12	0.135
MCF7_Abe_Res3	chr1_32772277_T_TCCCCCCCCCCCCCCC	chr1	32772277	T	TCCCCCCCCCCCCCCC	46	exonic	nonframeshift_insertion	KIAA1522	.	KIAA1522:NM_001198972:exon6:c.2921_2922insCCCCCCCCCCCCCCC:p.P977_A978insPPPPP,KIAA1522:NM_020888:exon6:c.3098_3099insCCCCCCCCCCCCCCC:p.P1036_A1037insPPPPP	.	.	1p35.1	.	.	.	.	.	.	NA	PASS	-10	.	.	.	.	.	.	.	.	.	.	.	.	.	.	.	.	.	.	.	.	.	30,10	0.15	30	10	0.15
MCF7_Abe_Res3	chr1_70021088_G_C	chr1	70021088	G	C	50	exonic	nonsynonymous_SNV	LRRC7	.	LRRC7:NM_020794:exon14:c.G1390C:p.E464Q,LRRC7:NM_001350216:exon16:c.G1507C:p.E503Q,LRRC7:NM_001330635:exon17:c.G1405C:p.E469Q	.	.	1p31.1	.	.	.	.	.	.	NA	PASS	-10	.	0.024	0.997	0.986	0	1	0.55	0.95	-1.56	0.637	6.02	27.9	0.999	0.991	-0.947	0.123	0.487	5.66	1.048	18.732	.	29,20	0.406	29	20	0.406
MCF7_Abe_Res3	chr2_112549386_T_TTA	chr2	112549386	T	TTA	73	exonic	frameshift_insertion	POLR1B	.	POLR1B:NM_001137604:exon3:c.444_445insTA:p.T150Ifs*11,POLR1B:NM_001282774:exon4:c.612_613insTA:p.T206Ifs*11,POLR1B:NM_001282779:exon4:c.195_196insTA:p.T67Ifs*11,POLR1B:NM_019014:exon4:c.612_613insTA:p.T206Ifs*11,POLR1B:NM_001282772:exon5:c.726_727insTA:p.T244Ifs*11,POLR1B:NM_001282777:exon5:c.195_196insTA:p.T67Ifs*11	.	.	2q14.1	.	.	.	.	.	.	NA	PASS	-10	.	.	.	.	.	.	.	.	.	.	.	.	.	.	.	.	.	.	.	.	.	60,6	0.076	60	6	0.076
MCF7_Abe_Res3	chr3_36528899_C_A	chr3	36528899	C	A	54	exonic	nonsynonymous_SNV	STAC	.	STAC:NM_001292049:exon8:c.C841A:p.L281I,STAC:NM_003149:exon10:c.C1024A:p.L342I	.	.	3p22.2	.	.	.	.	.	.	NA	PASS	-10	.	0.04	0.001	0.001	0.001	0.65	0.41	1.54	1.51	0.232	4.15	23.8	0.989	0.854	-1.048	0.054	0.638	4.58	-0.273	16.286	SH3_domain\x3bSpectrin_alpha_chain,_SH3_domain	42,12	0.216	42	12	0.216
MCF7_Abe_Res3	chr5_127449204_G_A	chr5	127449204	G	A	18	exonic	nonsynonymous_SNV	MEGF10	.	MEGF10:NM_001256545:exon22:c.G2962A:p.G988S,MEGF10:NM_032446:exon23:c.G2962A:p.G988S	.	.	5q23.2	.	.	.	.	.	.	NA	PASS	-10	.	0.657	0.079	0.003	0.039	0.996	1.61	-1.28	0.62	0.224	1.578	13.73	0.954	0.894	-0.643	0.333	0.707	3.77	0.138	12.583	.	8,9	0.538	8	9	0.538
MCF7_Abe_Res3	chr6_70199707_C_G	chr6	70199707	C	G	25	exonic	nonsynonymous_SNV	COL19A1	.	COL19A1:NM_001858:exon49:c.C3194G:p.P1065R	.	.	6q13	.	.	.	.	.	.	NA	PASS	-10	.	.	1	0.998	0	1	2.565	.	.	0.706	4.903	24.9	0.996	0.956	0.899	0.921	0.476	5.91	0.935	20.301	.	18,6	0.222	18	6	0.222
MCF7_Abe_Res3	chr6_127580367_A_G	chr6	127580367	A	G	83	exonic	nonsynonymous_SNV	C6orf58	.	C6orf58:NM_001010905:exon3:c.A491G:p.N164S	.	.	6q22.33	.	.	.	.	.	.	NA	PASS	-10	.	0.225	0.72	0.241	0.008	1	0.895	0.94	-0.57	0.034	-0.403	0.38	0.712	0.061	-1.055	0.026	0.516	3.43	1.088	8.02	.	66,15	0.231	66	15	0.231
MCF7_Abe_Res3	chr7_94401583_A_G	chr7	94401583	A	G	59	exonic	nonsynonymous_SNV	COL1A2	.	COL1A2:NM_000089:exon6:c.A242G:p.Y81C	.	.	7q21.3	.	.	.	.	.	.	NA	PASS	-10	.	0.018	0.991	0.866	0.01	1	1.445	-2.55	-4.16	0.541	2.173	17.33	0.955	0.94	0.122	0.663	0.706	-1.55	1.199	12.623	.	48,10	0.201	48	10	0.201
MCF7_Abe_Res3	chr7_107906327_A_G	chr7	107906327	A	G	91	exonic	nonsynonymous_SNV	DLD	.	DLD:NM_001289750:exon6:c.A346G:p.K116E,DLD:NM_001289751:exon7:c.A574G:p.K192E,DLD:NM_001289752:exon7:c.A499G:p.K167E,DLD:NM_000108:exon8:c.A643G:p.K215E	.	.	7q31.1	.	.	.	.	.	.	NA	PASS	-10	.	0.064	0.004	0.033	0	1	2.005	0.29	-2.37	0.295	3.147	22.6	0.997	0.954	-0.774	0.219	0.732	5.65	1.199	16.16	Pyridine_nucleotide-disulphide_oxidoreductase,_FAD/NAD(P)-binding_domain\x3bPyridine_nucleotide-disulphide_oxidoreductase,_NAD-binding_domain	75,13	0.164	75	13	0.164
MCF7_Abe_Res3	chr7_113918226_C_A	chr7	113918226	C	A	26	exonic	nonsynonymous_SNV	PPP1R3A	.	PPP1R3A:NM_002711:exon1:c.G771T:p.K257N	.	.	7q31.1	.	.	.	.	.	.	NA	PASS	-10	.	0	0.999	0.968	0	0.989	2.095	2.12	-2.55	0.722	5.41	26	0.998	0.976	-1.026	0.114	0.487	3.08	-0.391	10.833	.	17,8	0.381	17	8	0.381
MCF7_Abe_Res3	chr7_144109726_C_G	chr7	144109726	C	G	70	exonic	nonsynonymous_SNV	OR2A2	.	OR2A2:NM_001005480:exon1:c.C144G:p.I48M	.	.	7q35	.	.	.	.	.	.	NA	PASS	-10	.	0.005	0.886	0.515	0.007	1	3.49	3.09	-2.3	0.612	2.716	20.9	0.991	0.076	-1.061	0.041	0.487	-0.471	0.061	2.948	GPCR,_rhodopsin-like,_7TM	44,22	0.311	44	22	0.311
MCF7_Abe_Res3	chr8_144513457_C_A	chr8	144513457	C	A	320	exonic	stopgain	RECQL4	.	RECQL4:NM_004260:exon14:c.G2224T:p.E742X	.	.	8q24.3	.	.	.	.	.	.	NA	PASS	-10	.	.	.	.	.	.	.	.	.	.	10.018	36	0.679	0.949	.	.	0.284	3.78	0.756	13.824	Helicase,_C-terminal\x3bP-loop_containing_nucleoside_triphosphate_hydrolase	303,8	0.025	303	8	0.025
MCF7_Abe_Res3	chr10_50009058_CA_TG	chr10	50009058	CA	TG	201	exonic	nonframeshift_substitution	AGAP6	.	AGAP6:NM_001077665:exon8:c.933_934delinsTG:p.M312V	.	.	10q11.23	.	.	.	.	.	.	NA	PASS	-10	.	.	.	.	.	.	.	.	.	.	.	.	.	.	.	.	.	.	.	.	.	185,6	0.048	185	6	0.048
MCF7_Abe_Res3	chr11_61125789_G_A	chr11	61125789	G	A	122	exonic	nonsynonymous_SNV	CD5	.	CD5:NM_001346456:exon10:c.G1267A:p.D423N,CD5:NM_014207:exon10:c.G1438A:p.D480N	.	.	11q12.2	.	.	.	.	.	.	NA	PASS	-10	.	0	1	0.999	0	0.993	1.04	1.55	-3.14	0.143	5.28	25.7	0.999	0.949	-0.899	0.136	0.581	4.88	0.902	16.202	.	96,26	0.216	96	26	0.216
MCF7_Abe_Res3	chr12_559315_T_C	chr12	559315	T	C	149	exonic	nonsynonymous_SNV	B4GALNT3	.	B4GALNT3:NM_173593:exon19:c.T2782C:p.F928L	.	.	12p13.33	.	.	.	.	.	.	NA	PASS	-10	.	0.004	1	0.999	0	1	2.485	1.59	-5.68	0.917	6.249	28.9	0.999	0.978	-0.632	0.208	0.626	4.83	1.061	14.696	Nucleotide-diphospho-sugar_transferases	108,38	0.262	108	38	0.262
MCF7_Abe_Res3	chr12_52321055_G_A	chr12	52321055	G	A	94	exonic	nonsynonymous_SNV	KRT83	.	KRT83:NM_002282:exon1:c.C281T:p.T94M	.	.	12q13.13	.	.	.	.	.	.	NA	PASS	-10	.	0.016	0.124	0.063	0.151	0.985	2.815	-2.25	-3.23	0.329	3.831	23.4	0.995	0.738	-0.016	0.647	0.526	4.69	1.044	13.043	Insulin-like_growth_factor_binding_protein,_N-terminal	73,20	0.234	73	20	0.234
MCF7_Abe_Res3	chr12_52898748_A_G	chr12	52898748	A	G	143	exonic	nonsynonymous_SNV	KRT8	.	KRT8:NM_002273:exon6:c.T1133C:p.M378T,KRT8:NM_001256282:exon7:c.T1217C:p.M406T,KRT8:NM_001256293:exon7:c.T1133C:p.M378T	.	.	12q13.13	.	.	.	.	.	.	NA	PASS	-10	.	0	0.38	0.349	0	1	4.04	-2.46	-4.98	0.728	4.181	23.8	0.99	0.96	0.821	0.81	0.632	4.39	1.065	13.118	.	122,16	0.091	122	16	0.091
MCF7_Abe_Res3	chr12_94403180_T_C	chr12	94403180	T	C	40	exonic	nonsynonymous_SNV	CEP83	.	CEP83:NM_001042399:exon4:c.A407G:p.N136S,CEP83:NM_001346457:exon4:c.A407G:p.N136S,CEP83:NM_001346459:exon4:c.A95G:p.N32S,CEP83:NM_001346461:exon4:c.A407G:p.N136S,CEP83:NM_001346462:exon4:c.A95G:p.N32S,CEP83:NM_001346458:exon5:c.A95G:p.N32S,CEP83:NM_001346460:exon5:c.A407G:p.N136S,CEP83:NM_016122:exon5:c.A407G:p.N136S	.	.	12q22	.	.	.	.	.	.	NA	PASS	-10	.	0.674	0.006	0.003	.	1	1.61	0.98	-0.38	0.081	0.028	2.864	0.634	0.695	-0.982	0.15	0.638	0.015	-0.363	7.748	.	31,8	0.219	31	8	0.219
MCF7_Abe_Res3	chr15_82434266_GT_AC	chr15	82434266	GT	AC	33	exonic	nonframeshift_substitution	GOLGA6L9	.	GOLGA6L9:NM_001291420:exon5:c.192_193delinsAC:p.C65R,GOLGA6L9:NM_198181:exon6:c.666_667delinsAC:p.C223R	.	.	15q25.2	.	.	.	.	.	.	NA	PASS	-10	.	.	.	.	.	.	.	.	.	.	.	.	.	.	.	.	.	.	.	.	.	23,7	0.292	23	7	0.292
MCF7_Abe_Res3	chr16_31061291_C_T	chr16	31061291	C	T	84	exonic	nonsynonymous_SNV	ZNF668	.	ZNF668:NM_001172668:exon3:c.G1637A:p.C546Y,ZNF668:NM_001172670:exon3:c.G1637A:p.C546Y,ZNF668:NM_024706:exon3:c.G1637A:p.C546Y,ZNF668:NM_001172669:exon4:c.G1706A:p.C569Y	.	.	16p11.2	.	.	.	.	.	.	NA	PASS	-10	.	0	0.997	0.969	0	1	3.75	-1.94	-9.4	0.953	5.621	26.6	0.996	0.995	0.91	0.832	0.672	5.04	0.935	17.316	Zinc_finger_C2H2-type/integrase_DNA-binding_domain\x3bZinc_finger,_C2H2\x3bZinc_finger,_C2H2-like	54,30	0.362	54	30	0.362
MCF7_Abe_Res3	chr16_53645791_A_T	chr16	53645791	A	T	49	exonic	nonsynonymous_SNV	RPGRIP1L	.	RPGRIP1L:NM_001127897:exon17:c.T2517A:p.D839E,RPGRIP1L:NM_001308334:exon17:c.T2517A:p.D839E,RPGRIP1L:NM_001330538:exon17:c.T2517A:p.D839E,RPGRIP1L:NM_015272:exon17:c.T2517A:p.D839E	.	.	16q12.2	.	.	.	.	.	.	NA	PASS	-10	.	0.469	0.003	0.014	0	0.926	0.665	-0.44	-0.3	0.13	1.79	14.93	0.975	0.677	-0.994	0.136	0.638	4.33	0.138	3.064	C2_domain	34,14	0.3	34	14	0.3
MCF7_Abe_Res3	chr17_45267438_A_G	chr17	45267438	A	G	44	exonic	nonsynonymous_SNV	MAP3K14	.	MAP3K14:NM_003954:exon12:c.T2294C:p.V765A	.	.	17q21.31	2.16e-05	.	.	.	.	.	NA	PASS	-10	.	.	0.002	0.004	0.156	.	0	.	.	0.272	0.224	4.929	0.663	0.724	-1.059	0.048	0.257	2.03	0.238	6.268	.	26,17	0.387	26	17	0.387
MCF7_Abe_Res3	chr17_76277266_C_T	chr17	76277266	C	T	150	exonic	nonsynonymous_SNV	QRICH2	.	QRICH2:NM_032134:exon16:c.G4664A:p.R1555H	.	0.000199681	17q25.1	4.734e-05	.	.	.	.	.	NA	PASS	-10	0.0001	0.206	0.054	0.01	.	0.959	1.79	2.97	-1.87	0.268	3.054	22.4	0.897	0.107	-0.948	0.023	0.646	1.36	-0.34	4.712	.	102,41	0.306	102	41	0.306
MCF7_Abe_Res3	chr18_31873448_C_T	chr18	31873448	C	T	75	exonic	nonsynonymous_SNV	TRAPPC8	.	TRAPPC8:NM_014939:exon14:c.G2044A:p.D682N	.	.	18q12.1	.	.	.	.	.	.	NA	PASS	-10	.	0.441	0.698	0.093	0	1	1.7	3.01	-1.35	0.134	3.497	23.1	0.994	0.966	-1.048	0.029	0.732	5.85	0.935	20.173	.	43,31	0.365	43	31	0.365
MCF7_Abe_Res3	chr19_8952525_T_C	chr19	8952525	T	C	73	exonic	nonsynonymous_SNV	MUC16	.	MUC16:NM_024690:exon3:c.A24245G:p.K8082R	.	.	19p13.2	9.482e-06	.	.	.	.	.	NA	PASS	-10	.	0.084	0.004	0.004	.	1	1.78	1.42	-0.31	0.026	-1.503	0.003	0.404	0.006	-1.012	0.056	0.554	-6.17	0.071	3.995	.	36,33	0.479	36	33	0.479
MCF7_Abe_Res3	chr19_10797410_T_G	chr19	10797410	T	G	41	exonic	nonsynonymous_SNV	DNM2	.	DNM2:NM_001005361:exon10:c.T1227G:p.F409L,DNM2:NM_001005362:exon10:c.T1227G:p.F409L	.	.	19p13.2	.	.	.	.	.	.	NA	PASS	-10	.	0.001	1	0.994	0	1	3.555	-1.7	-5.71	0.878	5.907	27.5	0.998	0.94	0.618	0.764	0.722	4.28	0.141	10.258	Dynamin_central_domain	32,6	0.178	32	6	0.178
MCF7_Abe_Res3	chr20_47310102_T_C	chr20	47310102	T	C	848	exonic	nonsynonymous_SNV	ZMYND8	.	ZMYND8:NM_001281769:exon3:c.A188G:p.K63R,ZMYND8:NM_001281771:exon3:c.A188G:p.K63R,ZMYND8:NM_001281775:exon3:c.A188G:p.K63R,ZMYND8:NM_001281776:exon3:c.A188G:p.K63R,ZMYND8:NM_001281777:exon3:c.A188G:p.K63R,ZMYND8:NM_001281778:exon3:c.A188G:p.K63R,ZMYND8:NM_001281781:exon3:c.A188G:p.K63R,ZMYND8:NM_001281782:exon3:c.A188G:p.K63R,ZMYND8:NM_001281783:exon3:c.A188G:p.K63R,ZMYND8:NM_001281784:exon3:c.A1…	.	.	20q13.12	1.883e-05	.	.	.	.	.	NA	PASS	-10	.	0.066	1	0.998	0	0.999	1.04	0.95	-1.38	0.596	5.755	27	0.999	0.939	-0.902	0.178	0.722	5.55	1.061	15.718	Zinc_finger,_FYVE/PHD-type	814,10	0.014	814	10	0.014
MCF7_Abe_Res3	chr20_57202554_G_T	chr20	57202554	G	T	2051	exonic	nonsynonymous_SNV	BMP7	.	BMP7:NM_001719:exon3:c.C681A:p.D227E	.	.	20q13.31	.	.	.	.	.	.	NA	PASS	-10	.	0.084	1	0.998	0	1	2.915	-1.05	-2.93	0.935	5.238	25.6	0.998	0.882	-0.407	0.364	0.626	1.65	0.154	8.141	Transforming_growth_factor-beta,_N-terminal	1984,20	0.011	1984	20	0.011
MCF7_Abe_Res3	chr22_50285851_C_T	chr22	50285851	C	T	29	exonic	nonsynonymous_SNV	PLXNB2	.	PLXNB2:NM_012401:exon11:c.G2037A:p.M679I	.	.	22q13.33	2.846e-05	.	.	.	.	.	NA	PASS	-10	.	0.024	0.012	0.013	0.012	0.994	1.995	4.05	-0.43	0.253	3.063	22.4	0.991	0.575	-1.042	0.016	0.672	4.9	0.852	13.578	.	18,10	0.32	18	10	0.32
MCF7_Abe_Res3	chrX_141908036_T_C	chrX	141908036	T	C	113	exonic	nonsynonymous_SNV	MAGEC1	.	MAGEC1:NM_005462:exon4:c.T2632C:p.Y878H	.	.	Xq27.2	.	.	.	.	.	.	NA	PASS	-10	.	0.017	0.034	0.001	.	1	0	4.51	0.88	0.07	-0.744	0.057	0.894	0.011	-0.905	0.004	.	-1.88	-0.761	4.931	MAGE_homology_domain	75,36	0.318	75	36	0.318
MCF7_Palbo_Res1	chr1_77966731_T_C	chr1	77966731	T	C	26	exonic	nonsynonymous_SNV	FUBP1	.	FUBP1:NM_003902:exon7:c.A436G:p.R146G,FUBP1:NM_001303433:exon8:c.A499G:p.R167G	.	.	1p31.1	.	.	.	.	.	.	NA	PASS	-10	.	0	1	0.999	0	1	2.57	1.41	-6.86	0.986	6.361	29.4	0.999	0.96	-0.753	0.169	0.707	5.67	1.061	16.199	K_Homology_domain\x3bK_Homology_domain,_type_1	10,16	0.542	10	16	0.542
MCF7_Palbo_Res1	chr1_197086959_C_T	chr1	197086959	C	T	20	exonic	nonsynonymous_SNV	ASPM	.	ASPM:NM_001206846:exon26:c.G5420A:p.R1807K,ASPM:NM_018136:exon27:c.G10175A:p.R3392K	.	.	1q31.3	.	.	.	.	.	.	NA	PASS	-10	.	0.653	0.836	0.325	0.023	1	1.355	1.71	-0.85	0.203	2.425	18.98	0.905	0.303	-0.988	0.089	0.732	3.91	0.065	4.302	IQ_motif,_EF-hand_binding_site\x3bP-loop_containing_nucleoside_triphosphate_hydrolase	14,6	0.379	14	6	0.379
MCF7_Palbo_Res1	chr9_39446724_C_A	chr9	39446724	C	A	23	ncRNA_exonic	.	ZNF658B	.	.	.	.	9p12	.	.	.	.	.	.	NA	PASS	-10	.	.	.	.	.	.	.	.	.	.	.	.	.	.	.	.	.	.	.	.	.	12,11	0.476	12	11	0.476
MCF7_Palbo_Res1	chr10_73805959_G_C	chr10	73805959	G	C	157	exonic	nonsynonymous_SNV	NDST2	.	NDST2:NM_001330107:exon7:c.C1504G:p.R502G,NDST2:NM_003635:exon7:c.C1504G:p.R502G	.	.	10q22.2	.	.	.	.	.	.	NA	PASS	-10	.	0.074	0.024	0.072	0.001	0.978	0.895	1.27	-1.42	0.301	3.366	22.9	0.996	0.952	-1.05	0.092	0.707	5.95	1.048	13.291	.	51103	0.655	51	103	0.655
MCF7_Palbo_Res1	chr18_47594165_C_T	chr18	47594165	C	T	21	ncRNA_exonic	.	MIR4527HG	.	.	.	.	18q21.1	.	.	.	.	.	.	NA	PASS	-10	.	.	.	.	.	.	.	.	.	.	.	.	.	.	.	.	.	.	.	.	.	10,10	0.5	10	10	0.5
MCF7_Palbo_Res1	chr19_12897848_G_C	chr19	12897848	G	C	72	exonic	nonsynonymous_SNV	GCDH	.	GCDH:NM_000159:exon11:c.G1228C:p.V410L,GCDH:NM_013976:exon11:c.G1228C:p.V410L	.	.	19p13.13	.	.	.	.	.	.	NA	PASS	-10	.	0.001	1	0.999	0	1	2.54	-3.69	-2.83	0.891	6.321	29.2	0.998	0.994	1.048	0.925	0.707	5.75	1.048	17.436	Acyl-CoA_dehydrogenase/oxidase_C-terminal	40,32	0.444	40	32	0.444
MCF7_Palbo_Res1	chr1_38045731_C_T	chr1	38045731	C	T	124	exonic	nonsynonymous_SNV	POU3F1	.	POU3F1:NM_002699:exon1:c.G1013A:p.R338H	.	.	1p34.3	.	.	.	.	.	.	NA	PASS	-10	.	0	0.995	0.784	0	1	3.66	-3.82	-5	0.479	4.826	24.8	0.999	0.924	1.004	0.919	0.789	2.78	-0.001	10.999	Homeobox_domain\x3bHomeodomain-like\x3bPOU_domain	117,6	0.042	117	6	0.042
MCF7_Palbo_Res1	chr1_119941731_A_C	chr1	119941731	A	C	80	exonic	nonsynonymous_SNV	NOTCH2	.	NOTCH2:NM_001200001:exon18:c.T2776G:p.C926G,NOTCH2:NM_024408:exon18:c.T2776G:p.C926G	.	.	1p12	.	.	.	.	.	.	NA	PASS	-10	.	0	1	0.999	0.001	1	4.86	-12.4	-10.51	0.997	5.255	25.6	0.987	0.993	1.587	1	0.706	6.08	1.14	15.832	EGF-like_calcium-binding_domain\x3bEGF-like_calcium-binding,_conserved_site\x3bEpidermal_growth_factor-like_domain	66,11	0.156	66	11	0.156
MCF7_Palbo_Res1	chr1_151103636_G_A	chr1	151103636	G	A	95	exonic	nonsynonymous_SNV	GABPB2	.	GABPB2:NM_001323913:exon5:c.G529A:p.E177K,GABPB2:NM_001323906:exon6:c.G697A:p.E233K,GABPB2:NM_001323908:exon6:c.G697A:p.E233K,GABPB2:NM_144618:exon6:c.G697A:p.E233K,GABPB2:NM_001323910:exon7:c.G745A:p.E249K	.	.	1q21.3	.	.	.	.	.	.	NA	PASS	-10	.	0.069	0.982	0.952	0.107	1	0.805	0.25	-1.16	0.45	2.671	20.6	0.996	0.938	-0.972	0.132	0.638	3.33	0.004	8.316	.	80,12	0.123	80	12	0.123
MCF7_Palbo_Res1	chr1_201208351_C_T	chr1	201208351	C	T	210	exonic	nonsynonymous_SNV	IGFN1	.	IGFN1:NM_001164586:exon12:c.C3458T:p.P1153L	.	.	1q32.1	.	.	.	.	.	.	NA	PASS	-10	.	0	.	.	.	1	0	-2.3	-2.97	0.039	3.919	23.5	0.991	0.161	-0.335	0.425	0.487	3.97	0.852	14.319	Immunoglobulin-like_domain	179,26	0.116	179	26	0.116
MCF7_Palbo_Res1	chr1_239907828_C_T	chr1	239907828	C	T	90	exonic	nonsynonymous_SNV	CHRM3	.	CHRM3:NM_000740:exon5:c.C377T:p.T126M,CHRM3:NM_001347716:exon8:c.C377T:p.T126M	ID\x3dCOSM906309\x3bOCCURENCE\x3d1(breast),1(endometrium)	.	1q43	9.416e-06	.	.	.	.	.	NA	PASS	-10	.	0	1	1	0	1	1.175	2.15	-5.3	0.93	6.204	28.7	0.999	0.983	-1.057	0.114	0.615	5.9	0.935	20.279	GPCR,_rhodopsin-like,_7TM	78,8	0.092	78	8	0.092
MCF7_Palbo_Res1	chr2_33252806_G_C	chr2	33252806	G	C	80	exonic	nonsynonymous_SNV	LTBP1	.	LTBP1:NM_000627:exon7:c.G1151C:p.W384S,LTBP1:NM_001166264:exon7:c.G1151C:p.W384S,LTBP1:NM_001166265:exon7:c.G1151C:p.W384S,LTBP1:NM_001166266:exon7:c.G1151C:p.W384S,LTBP1:NM_206943:exon11:c.G2129C:p.W710S	.	.	2p22.3	.	.	.	.	.	.	NA	PASS	-10	.	0.001	1	1	.	1	3.26	-4.34	-13.43	0.905	6.672	32	0.992	0.991	1.081	0.977	0.707	5.58	1.048	19.582	TB_domain	72,8	0.118	72	8	0.118
MCF7_Palbo_Res1	chr2_178746085_T_G	chr2	178746085	T	G	61	exonic	nonsynonymous_SNV	TTN	.	TTN:NM_133379:exon46:c.A16315C:p.K5439Q	.	.	2q31.2	.	.	.	.	.	.	NA	PASS	-10	.	0.588	0.928	0.408	.	1	1.02	-0.26	0.31	0.149	0.57	7.946	0.895	0.972	-0.816	0.196	0.554	6.07	1.061	11.676	Immunoglobulin_I-set\x3bImmunoglobulin_subtype\x3bImmunoglobulin-like_domain\x3bImmunoglobulin-like_fold	50,10	0.174	50	10	0.174
MCF7_Palbo_Res1	chr2_229785842_C_T	chr2	229785842	C	T	29	exonic	nonsynonymous_SNV	TRIP12	.	TRIP12:NM_001284216:exon31:c.G3974A:p.R1325Q,TRIP12:NM_001284215:exon33:c.G4883A:p.R1628Q,TRIP12:NM_001348316:exon33:c.G4883A:p.R1628Q,TRIP12:NM_001348317:exon33:c.G4868A:p.R1623Q,TRIP12:NM_001348318:exon33:c.G4868A:p.R1623Q,TRIP12:NM_001348331:exon33:c.G4787A:p.R1596Q,TRIP12:NM_004238:exon33:c.G4784A:p.R1595Q,TRIP12:NM_001284214:exon34:c.G4928A:p.R1643Q,TRIP12:NM_001348315:exon34:c.G4928A:p.R164…	ID\x3dCOSM1306517\x3bOCCURENCE\x3d1(urinary_tract)	.	2q36.3	.	.	.	.	.	.	NA	PASS	-10	.	0	0.998	0.945	0	1	2.605	-0.01	-3.41	0.974	8.192	35	1	0.981	0.009	0.472	0.707	5.36	0.892	19.452	HECT	19,10	0.409	19	10	0.409
MCF7_Palbo_Res1	chr3_6861513_C_A	chr3	6861513	C	A	99	exonic	stopgain	GRM7	.	GRM7:NM_000844:exon1:c.C125A:p.S42X,GRM7:NM_181874:exon1:c.C125A:p.S42X	.	.	3p26.1	.	.	.	.	.	.	NA	PASS	-10	.	.	.	.	0	1	.	.	.	.	10.284	36	0.994	0.962	.	.	0.598	4.51	0.852	12.776	.	89,8	0.087	89	8	0.087
MCF7_Palbo_Res1	chr3_97532543_AG_A	chr3	97532543	AG	A	67	splicing	.	EPHA6	NM_001080448:exon11:c.2386+1G>-\x3bNM_001278300:exon8:c.562+1G>-\x3bNM_173655:exon9:c.562+1G>-	.	.	.	3q11.2	.	.	.	.	.	.	NA	PASS	-10	.	.	.	.	.	.	.	.	.	.	.	.	.	.	.	.	.	.	.	.	.	57,9	0.149	57	9	0.149
MCF7_Palbo_Res1	chr3_126016756_T_C	chr3	126016756	T	C	133	exonic	nonsynonymous_SNV	SLC41A3	.	SLC41A3:NM_001008486:exon6:c.A757G:p.I253V,SLC41A3:NM_001008487:exon6:c.A787G:p.I263V,SLC41A3:NM_001164475:exon6:c.A514G:p.I172V,SLC41A3:NM_001008485:exon7:c.A865G:p.I289V,SLC41A3:NM_017836:exon7:c.A865G:p.I289V	.	.	3q21.2	1.885e-05	.	.	.	.	.	NA	PASS	-10	.	1	0.191	0.066	0	0.963	0.69	1.57	0.19	0.133	0.611	8.231	0.686	0.593	-1.047	0.032	0.732	3.03	1.011	3.246	SLC41_divalent_cation_transporters,_integral_membrane_domain	118,12	0.082	118	12	0.082
MCF7_Palbo_Res1	chr3_185473260_G_T	chr3	185473260	G	T	147	exonic	nonsynonymous_SNV	MAP3K13	.	MAP3K13:NM_001242317:exon10:c.G1308T:p.Q436H,MAP3K13:NM_004721:exon11:c.G1929T:p.Q643H,MAP3K13:NM_001242314:exon12:c.G1929T:p.Q643H	.	.	3q27.2	.	.	.	.	.	.	NA	PASS	-10	.	0.319	0.001	0.002	0	1	-0.55	0.95	-0.96	0.296	-0.429	0.329	0.775	0.209	-1.056	0.033	0.554	-3.92	-0.241	6.634	Protein_kinase-like_domain	115,25	0.191	115	25	0.191
MCF7_Palbo_Res1	chr5_5464268_G_A	chr5	5464268	G	A	77	exonic	nonsynonymous_SNV	ICE1	.	ICE1:NM_015325:exon13:c.G4934A:p.R1645K	.	.	5p15.32	.	.	.	.	.	.	NA	PASS	-10	.	0	0.999	0.994	.	0.561	1.355	2.73	-2.05	0.11	5.239	25.6	0.997	0.929	-0.997	0.079	0.732	5.27	0.998	16.376	.	61,11	0.169	61	11	0.169
MCF7_Palbo_Res1	chr5_35759697_G_C	chr5	35759697	G	C	60	exonic	nonsynonymous_SNV	SPEF2	.	SPEF2:NM_024867:exon25:c.G3598C:p.D1200H	.	.	5p13.2	.	.	.	.	.	.	NA	PASS	-10	.	0.012	0.992	0.826	0.569	0.842	1.845	1.51	-1.62	0.143	4.761	24.7	0.994	0.984	-0.907	0.164	0.487	5.18	1.048	17.845	.	51,6	0.114	51	6	0.114
MCF7_Palbo_Res1	chr5_93585276_G_T	chr5	93585276	G	T	145	exonic	stopgain	NR2F1	.	NR2F1:NM_005654:exon1:c.G253T:p.E85X	.	.	5q15	.	.	.	.	.	.	NA	PASS	-10	.	.	.	.	0.001	1	.	.	.	.	11.978	38	0.996	0.89	.	.	0.437	2.26	0.787	9.971	Zinc_finger,_NHR/GATA-type\x3bZinc_finger,_nuclear_hormone_receptor-type	127,17	0.139	127	17	0.139
MCF7_Palbo_Res1	chr6_35955352_C_G	chr6	35955352	C	G	102	exonic	nonsynonymous_SNV	SLC26A8	.	SLC26A8:NM_138718:exon15:c.G1717C:p.E573Q,SLC26A8:NM_001193476:exon17:c.G2032C:p.E678Q,SLC26A8:NM_052961:exon17:c.G2032C:p.E678Q	.	.	6p21.31	.	.	.	.	.	.	NA	PASS	-10	.	0.091	0.999	0.964	0.067	1	1.7	-3.54	-1.68	0.24	1.893	15.55	0.993	0.121	0.308	0.817	0.428	3.87	0.935	9.265	STAS_domain	92,8	0.067	92	8	0.067
MCF7_Palbo_Res1	chr7_95269315_G_A	chr7	95269315	G	A	43	exonic	nonsynonymous_SNV	PPP1R9A	.	PPP1R9A:NM_001166161:exon12:c.G2812A:p.V938M,PPP1R9A:NM_001166162:exon12:c.G2866A:p.V956M,PPP1R9A:NM_001166160:exon14:c.G2932A:p.V978M	.	.	7q21.3	.	.	.	.	.	.	NA	PASS	-10	.	0.298	0.088	0.033	.	1	0	2.49	0.17	0.121	2.727	21	0.982	0.842	-1.043	0.023	0.706	4.42	0.998	10.952	.	35,7	0.163	35	7	0.163
MCF7_Palbo_Res1	chr8_56316167_C_A	chr8	56316167	C	A	139	exonic	nonsynonymous_SNV	SDR16C5	.	SDR16C5:NM_001318049:exon2:c.G181T:p.A61S,SDR16C5:NM_001318050:exon2:c.G181T:p.A61S,SDR16C5:NM_138969:exon2:c.G181T:p.A61S	ID\x3dCOSM403003\x3bOCCURENCE\x3d1(lung)	.	8q12.1	.	.	.	.	.	.	NA	PASS	-10	.	0.034	0.999	0.986	0	1	2.17	-2.51	-2.6	0.704	5.264	25.7	0.997	0.952	0.738	0.81	0.487	5.25	0.935	18.855	NAD(P)-binding_domain	130,6	0.049	130	6	0.049
MCF7_Palbo_Res1	chr10_84237633_G_T	chr10	84237633	G	T	41	exonic	nonsynonymous_SNV	LRIT1	.	LRIT1:NM_015613:exon2:c.C176A:p.P59Q	.	.	10q23.1	.	.	.	.	.	.	NA	PASS	-10	.	0.074	0.019	0.035	0.404	1	0.805	0.56	0.4	0.139	2.555	19.82	0.932	0.331	-1.006	0.094	0.526	3.38	0.077	7.447	Leucine-rich_repeat-containing_N-terminal	31,9	0.226	31	9	0.226
MCF7_Palbo_Res1	chr10_113641365_G_C	chr10	113641365	G	C	35	exonic	nonsynonymous_SNV	NRAP	.	NRAP:NM_006175:exon12:c.C1218G:p.N406K,NRAP:NM_001261463:exon13:c.C1323G:p.N441K,NRAP:NM_001322945:exon13:c.C1323G:p.N441K,NRAP:NM_198060:exon13:c.C1323G:p.N441K	.	.	10q25.3	.	.	.	.	.	.	NA	PASS	-10	.	0.021	0.896	0.705	0	1	1.79	2.61	-1.81	0.163	4.102	23.7	0.984	0.122	-0.812	0.097	0.487	-8.34	-1.379	19.314	.	24,11	0.308	24	11	0.308
MCF7_Palbo_Res1	chr11_134314337_T_A	chr11	134314337	T	A	17	exonic	nonsynonymous_SNV	GLB1L3	.	GLB1L3:NM_001080407:exon18:c.T1675A:p.S559T	.	.	11q25	.	.	.	.	.	.	NA	PASS	-10	.	0.515	0.014	0.01	0.048	1	0.895	-3.21	-1.57	0.235	0.17	4.362	0.768	0.135	-0.557	0.567	0.744	3.4	1.061	7.024	Galactose-binding_domain-like	11,6	0.333	11	6	0.333
MCF7_Palbo_Res1	chr12_70556135_T_C	chr12	70556135	T	C	97	exonic	nonsynonymous_SNV	PTPRB	.	PTPRB:NM_001206971:exon16:c.A3804G:p.I1268M,PTPRB:NM_001206972:exon16:c.A3804G:p.I1268M,PTPRB:NM_002837:exon17:c.A4074G:p.I1358M,PTPRB:NM_001330204:exon18:c.A4464G:p.I1488M,PTPRB:NM_001109754:exon19:c.A4728G:p.I1576M	.	.	12q15	.	.	.	.	.	.	NA	PASS	-10	.	0.015	0.995	0.979	0	0.984	0.695	0.59	-1.78	0.472	4.181	23.8	0.991	0.834	-0.906	0.17	0.672	-2.03	0.129	12.204	Fibronectin_type_III\x3bImmunoglobulin-like_fold	84,11	0.113	84	11	0.113
MCF7_Palbo_Res1	chr12_95906448_G_T	chr12	95906448	G	T	19	exonic	nonsynonymous_SNV	CCDC38	.	CCDC38:NM_182496:exon5:c.C308A:p.S103Y	.	.	12q23.1	.	.	.	.	.	.	NA	PASS	-10	.	0.151	0.947	0.556	0.222	0.92	0.695	1.45	-1.71	0.124	2.187	17.42	0.955	0.861	-1.143	0.068	0.487	4.98	0.953	13.612	.	9,9	0.429	9	9	0.429
MCF7_Palbo_Res1	chr12_129700016_G_C	chr12	129700016	G	C	107	exonic	nonsynonymous_SNV	TMEM132D	.	TMEM132D:NM_133448:exon2:c.C762G:p.H254Q	.	.	12q24.33	.	.	.	.	.	.	NA	PASS	-10	.	0.573	0.012	0.013	0.98	1	0.35	2.85	0.39	0.033	-0.84	0.035	0.707	0.073	-0.92	0.016	0.615	1.4	0.029	4.643	.	91,14	0.149	91	14	0.149
MCF7_Palbo_Res1	chr14_32546602_T_G	chr14	32546602	T	G	91	exonic	nonsynonymous_SNV	AKAP6	.	AKAP6:NM_004274:exon4:c.T1949G:p.L650R	.	.	14q12	.	.	.	.	.	.	NA	PASS	-10	.	0	1	0.998	0	1	2.045	1.01	-2.84	0.88	5.593	26.5	0.998	0.984	-0.579	0.261	0.638	6.11	1.061	16.702	.	81,6	0.084	81	6	0.084
MCF7_Palbo_Res1	chr14_103522363_G_T	chr14	103522363	G	T	96	exonic	nonsynonymous_SNV	CKB	.	CKB:NM_001823:exon2:c.C131A:p.A44D	.	.	14q32.33	.	.	.	.	.	.	NA	PASS	-10	.	1	0	0	0.001	0.633	-2.455	0.17	3.92	0.317	1.388	12.72	0.943	0.528	-0.915	0.028	0.455	2.29	0.905	6.793	ATP:guanido_phosphotransferase,_N-terminal	80,13	0.169	80	13	0.169
MCF7_Palbo_Res1	chr16_734736_C_A	chr16	734736	C	A	90	splicing	.	CIAO3	NM_001304799:exon6:c.268+1G>T\x3bNM_022493:exon5:c.574+1G>T	.	.	.	16p13.3	.	.	.	.	.	.	NA	PASS	-10	.	.	.	.	.	1	.	.	.	.	4.746	24.7	0.993	0.955	.	.	0.14	5.13	0.888	17.559	.	76,10	0.134	76	10	0.134
MCF7_Palbo_Res1	chr18_31546595_C_T	chr18	31546595	C	T	82	exonic	nonsynonymous_SNV	DSG2	.	DSG2:NM_001943:exon15:c.C3209T:p.T1070M	.	0.00399361	18q12.1	0.0013	Likely_benign|Likely_benign|Benign|Uncertain_significance|Uncertain_significance	not_specified|not_provided|Arrhythmogenic_right_ventricular_cardiomyopathy,_type_10|Cardiomyopathy,_ARVC|Dilated_Cardiomyopathy,_Dominant	RCV000154705.1|RCV000172531.1|RCV000232055.1|RCV000331727.1|RCV000370010.1	MedGen|MedGen|MedGen:OMIM|MedGen|MedGen	CN169374|CN221809|C1857777:610193|CN239181|CN239310	NA	PASS	-10	0.0007	0.137	0.003	0.001	0.441	1	1.385	-1.06	0.37	0.054	0.059	3.179	0.808	0.008	-0.974	0.132	0.707	-9.34	-1.464	4.468	.	72,9	0.155	72	9	0.155
MCF7_Palbo_Res1	chr19_38612618_G_A	chr19	38612618	G	A	47	exonic	nonsynonymous_SNV	MAP4K1	.	MAP4K1:NM_001042600:exon9:c.C658T:p.P220S,MAP4K1:NM_007181:exon9:c.C658T:p.P220S	.	.	19q13.2	.	.	.	.	.	.	NA	PASS	-10	.	0	1	0.999	0	1	1.215	-0.05	-7.54	0.795	5.468	26.2	0.999	0.987	-0.316	0.338	0.672	4.21	0.953	15.349	Protein_kinase_domain\x3bProtein_kinase-like_domain\x3bSerine/threonine/dual_specificity_protein_kinase,_catalytic__domain	41,6	0.142	41	6	0.142
MCF7_Palbo_Res1	chr19_41756924_T_C	chr19	41756924	T	C	139	exonic	nonsynonymous_SNV	CEACAM6	.	CEACAM6:NM_002483:exon2:c.T389C:p.V130A	.	.	19q13.2	.	.	.	.	.	.	NA	PASS	-10	.	0.731	0.004	0.026	.	1	1.4	-0.22	-0.41	0.114	-3.207	0.001	0.251	0.002	-0.956	0.134	0.516	-4.29	-0.886	0.298	Immunoglobulin_V-set_domain\x3bImmunoglobulin_subtype\x3bImmunoglobulin-like_fold	109,27	0.202	109	27	0.202
MCF7_Palbo_Res1	chr19_49426885_C_A	chr19	49426885	C	A	107	exonic	nonsynonymous_SNV	GFY	.	GFY:NM_001195256:exon1:c.C455A:p.T152N	.	.	19q13.33	.	.	.	.	.	.	NA	PASS	-10	.	.	.	.	.	.	.	.	.	0.016	3.326	22.9	0.967	0.092	.	.	0.583	0.103	-0.436	2.818	.	100,6	0.051	100	6	0.051
MCF7_Palbo_Res1	chr22_20733805_A_G	chr22	20733805	A	G	51	exonic	nonsynonymous_SNV	PI4KA	.	PI4KA:NM_058004:exon35:c.T4091C:p.V1364A	.	.	22q11.21	.	.	.	.	.	.	NA	PASS	-10	.	.	0.063	0.05	0	1	1.405	-1.04	.	0.732	1.974	16.05	0.992	0.987	-0.728	0.27	0.732	5.04	1.028	14.763	.	39,10	0.205	39	10	0.205
MCF7_Palbo_Res1	chr22_21621527_T_G	chr22	21621527	T	G	151	exonic	nonsynonymous_SNV	UBE2L3	.	UBE2L3:NM_001256356:exon3:c.T227G:p.L76R,UBE2L3:NM_001256355:exon4:c.T497G:p.L166R,UBE2L3:NM_003347:exon4:c.T323G:p.L108R	.	.	22q11.21	.	.	.	.	.	.	NA	PASS	-10	.	0	1	0.987	0	1	4.26	0.88	-5.74	0.988	6.149	28.4	0.997	0.956	0.813	0.763	0.672	5.66	1.061	13.844	Ubiquitin-conjugating_enzyme_E2\x3bUbiquitin-conjugating_enzyme/RWD-like	134,11	0.078	134	11	0.078
MCF7_Palbo_Res2	chr1_15112407_C_G	chr1	15112407	C	G	35	ncRNA_exonic	.	TMEM51-AS1	.	.	.	.	1p36.21	.	.	.	.	.	.	NA	PASS	-10	.	.	.	.	.	.	.	.	.	.	.	.	.	.	.	.	.	.	.	.	.	7,28	0.773	7	28	0.773
MCF7_Palbo_Res2	chr2_226797760_G_A	chr2	226797760	G	A	43	exonic	nonsynonymous_SNV	IRS1	.	IRS1:NM_005544:exon1:c.C979T:p.R327C	ID\x3dCOSM1669810\x3bOCCURENCE\x3d1(breast)	.	2q36.3	.	.	.	.	.	.	NA	PASS	-10	.	0	1	0.999	0	1	2.22	-0.26	-6.79	0.877	6.364	29.4	0.999	0.863	0.002	0.501	0.696	5.66	1.048	19.737	.	12,30	0.667	12	30	0.667
MCF7_Palbo_Res2	chr6_28391463_C_T	chr6	28391463	C	T	65	exonic	nonsynonymous_SNV	ZSCAN12	.	ZSCAN12:NM_001163391:exon4:c.G827A:p.C276Y	.	.	6p22.1	.	.	.	.	.	.	NA	PASS	-10	.	0.061	1	0.999	0.002	1	2.805	0.34	-7.86	0.786	3.157	22.6	0.908	0.995	-0.282	0.315	0.707	4.08	0.935	15.198	Zinc_finger_C2H2-type/integrase_DNA-binding_domain\x3bZinc_finger,_C2H2\x3bZinc_finger,_C2H2-like	37,28	0.457	37	28	0.457
MCF7_Palbo_Res2	chr8_22125446_C_A	chr8	22125446	C	A	22	exonic	stopgain	HR	.	HR:NM_005144:exon5:c.G1615T:p.E539X,HR:NM_018411:exon5:c.G1615T:p.E539X	.	.	8p21.3	.	.	.	.	.	.	NA	PASS	-10	.	.	.	.	0.018	1	.	.	.	.	10.382	36	0.997	0.597	.	.	0.517	4.11	0.935	11.88	.	6,16	0.647	6	16	0.647
MCF7_Palbo_Res2	chr10_99956477_C_A	chr10	99956477	C	A	88	exonic	stopgain	DNMBP	.	DNMBP:NM_015221:exon4:c.G997T:p.G333X	.	.	10q24.2	.	.	.	.	.	.	NA	PASS	-10	.	.	.	.	0.147	1	.	.	.	.	7.885	35	0.989	0.483	.	.	0.672	5.01	0.039	13.665	.	38,46	0.544	38	46	0.544
MCF7_Palbo_Res2	chr17_9646113_C_A	chr17	9646113	C	A	23	exonic	nonsynonymous_SNV	USP43	.	USP43:NM_001267576:exon1:c.C481A:p.P161T,USP43:NM_153210:exon1:c.C481A:p.P161T	.	.	17p13.1	.	.	.	.	.	.	NA	PASS	-10	.	0.008	0.998	0.963	0	1	1.9	4.15	-5.35	0.565	6.219	28.8	0.997	0.962	-1.147	0.029	0.598	4.73	0.803	15.191	Peptidase_C19,_ubiquitin_carboxyl-terminal_hydrolase\x3bUbiquitin_specific_protease_domain	11,12	0.505	11	12	0.505
MCF7_Palbo_Res2	chr18_58984206_G_A	chr18	58984206	G	A	37	exonic	nonsynonymous_SNV	ZNF532	.	ZNF532:NM_001318726:exon10:c.G3646A:p.V1216I,ZNF532:NM_001318727:exon10:c.G3646A:p.V1216I,ZNF532:NM_001318728:exon11:c.G3646A:p.V1216I,ZNF532:NM_018181:exon11:c.G3646A:p.V1216I	.	.	18q21.32	6.748e-05	.	.	.	.	.	NA	PASS	-10	.	0.488	0.332	0.044	0.001	0.722	0.075	1.63	-0.34	0.137	1.564	13.65	0.949	0.87	-1.089	0.046	0.707	5.84	1.043	19.738	Zinc_finger,_C2H2\x3bZinc_finger,_C2H2-like	17,20	0.5	17	20	0.5
MCF7_Palbo_Res2	chrX_12498733_G_T	chrX	12498733	G	T	21	exonic	nonsynonymous_SNV	FRMPD4	.	FRMPD4:NM_014728:exon2:c.G95T:p.S32I	.	.	Xp22.2	.	.	.	.	.	.	NA	PASS	-10	.	0.066	0.013	0.015	0.185	0.999	1.1	3.34	-0.97	0.197	1.972	16.04	0.954	0.647	-0.982	0.015	.	3.96	0.148	6.474	.	6,14	0.647	6	14	0.647
MCF7_Palbo_Res2	chrX_103331554_G_A	chrX	103331554	G	A	58	exonic	nonsynonymous_SNV	TCEAL7	.	TCEAL7:NM_001348258:exon3:c.G151A:p.D51N,TCEAL7:NM_152278:exon3:c.G151A:p.D51N	.	.	Xq22.2	.	.	.	.	.	.	NA	PASS	-10	.	0	0.999	0.969	0.001	0.867	1.975	2.2	-3.61	0.279	6.311	29.2	0.999	0.605	-1.03	0.109	.	4.07	1.048	10.684	.	38,18	0.355	38	18	0.355
MCF7_Palbo_Res2	chr2_104856711_G_A	chr2	104856711	G	A	99	exonic	nonsynonymous_SNV	POU3F3	.	POU3F3:NM_006236:exon1:c.G1201A:p.A401T	.	.	2q12.1	.	.	.	.	.	.	NA	PASS	-10	.	0.032	0.627	0.177	0	1	-0.135	-1.9	-3.92	0.462	3.729	23.3	0.996	0.991	-0.246	0.324	0.598	4.14	0.908	15.186	Homeodomain-like	83,13	0.131	83	13	0.131
MCF7_Palbo_Res2	chr4_78308161_G_T	chr4	78308161	G	T	41	exonic	stopgain	FRAS1	.	FRAS1:NM_001166133:exon15:c.G1630T:p.E544X,FRAS1:NM_025074:exon15:c.G1630T:p.E544X	.	.	4q21.21	.	.	.	.	.	.	NA	PASS	-10	.	.	.	.	0.542	1	.	.	.	.	7.232	34	0.982	0.082	.	.	0.722	0.658	0.07	8.629	Insulin-like_growth_factor_binding_protein,_N-terminal	30,9	0.233	30	9	0.233
MCF7_Palbo_Res2	chr8_24914176_A_T	chr8	24914176	A	T	51	exonic	nonsynonymous_SNV	NEFM	.	NEFM:NM_005382:exon1:c.A383T:p.E128V	.	.	8p21.2	.	.	.	.	.	.	NA	PASS	-10	.	0.303	0.92	0.474	0	1	0.82	-2.03	-0.21	0.332	2.857	21.7	0.983	0.884	-0.381	0.368	0.726	4.24	1.14	10.611	.	40,6	0.139	40	6	0.139
MCF7_Palbo_Res2	chr9_116699289_C_T	chr9	116699289	C	T	219	exonic	nonsynonymous_SNV	TRIM32	.	TRIM32:NM_001099679:exon2:c.C1547T:p.P516L,TRIM32:NM_012210:exon2:c.C1547T:p.P516L	.	.	9q33.1	.	.	.	.	.	.	NA	PASS	-10	.	0.014	0.94	0.437	0	1	0.55	-3.12	-7.56	0.863	4.215	23.9	0.998	0.988	0.122	0.604	0.707	4.74	0.038	15.837	Six-bladed_beta-propeller,_TolB-like	190,20	0.106	190	20	0.106
MCF7_Palbo_Res2	chr11_124038566_C_T	chr11	124038566	C	T	164	exonic	nonsynonymous_SNV	OR10G7	.	OR10G7:NM_001004463:exon1:c.G436A:p.G146S	.	0.000599042	11q24.2	0.0001	.	.	.	.	.	NA	PASS	-10	0.0002	0.159	0.027	0.084	0.808	1	1.375	1.13	-1.93	0.106	0.057	3.154	0.622	0.063	-0.967	0.083	0.487	-6.19	-1.327	8.871	GPCR,_rhodopsin-like,_7TM	145,12	0.078	145	12	0.078
MCF7_Palbo_Res2	chr12_56343829_C_T	chr12	56343829	C	T	131	exonic	nonsynonymous_SNV	STAT2	.	STAT2:NM_005419:exon23:c.G2409A:p.M803I,STAT2:NM_198332:exon23:c.G2397A:p.M799I	.	.	12q13.3	.	.	.	.	.	.	NA	PASS	-10	.	0	0.789	0.423	0.008	0.992	0.975	0.58	-0.56	0.357	6.574	31	0.993	0.965	-0.912	0.133	0.707	4.24	0.935	12.429	Signal_transducer_and_activation_of_transcription_2,_C-terminal	119,8	0.077	119	8	0.077
MCF7_Palbo_Res2	chr13_95234777_T_A	chr13	95234777	T	A	30	exonic	nonsynonymous_SNV	ABCC4	.	ABCC4:NM_001105515:exon4:c.A364T:p.N122Y,ABCC4:NM_001301829:exon4:c.A364T:p.N122Y,ABCC4:NM_005845:exon4:c.A364T:p.N122Y	.	.	13q32.1	.	.	.	.	.	.	NA	PASS	-10	.	0.014	0.006	0.033	0.011	0.996	1.05	0.97	-2.63	0.205	0.337	6.047	0.903	0.365	-1.042	0.059	0.706	-5.39	-0.22	6.725	ABC_transporter_type_1,_transmembrane_domain	20,8	0.304	20	8	0.304
MCF7_Palbo_Res2	chr14_74799484_G_A	chr14	74799484	G	A	269	exonic	stopgain	YLPM1	.	YLPM1:NM_019589:exon5:c.G4187A:p.W1396X	.	.	14q24.3	.	.	.	.	.	.	NA	PASS	-10	.	.	.	.	0	1	.	.	.	.	12.584	39	0.995	0.977	.	.	0.707	5.96	0.943	20.417	.	251,8	0.028	251	8	0.028
MCF7_Palbo_Res2	chr15_80508252_G_T	chr15	80508252	G	T	138	exonic	nonsynonymous_SNV	ARNT2	.	ARNT2:NM_014862:exon6:c.G719T:p.R240M	.	.	15q25.1	.	.	.	.	.	.	NA	PASS	-10	.	0	1	0.999	0	1	4.065	1.64	-5.31	0.831	4.226	23.9	0.966	0.914	-0.037	0.309	0.706	3.78	0.891	15.377	PAS_domain\x3bPAS_fold	126,7	0.057	126	7	0.057
MCF7_Palbo_Res2	chr19_18388319_G_A	chr19	18388319	G	A	20	exonic	nonsynonymous_SNV	GDF15	.	GDF15:NM_004864:exon2:c.G311A:p.R104H	.	.	19p13.11	1.98e-05	.	.	.	.	.	NA	PASS	-10	.	0.001	0.976	0.513	0.315	1	1.845	-1.59	-2.25	0.301	3.721	23.3	0.998	0.194	-0.536	0.409	0.726	0.362	0.899	1.899	.	11,9	0.474	11	9	0.474
MCF7_Palbo_Res3	chr1_176206875_G_T	chr1	176206875	G	T	13	exonic	nonsynonymous_SNV	COP1	.	RFWD2:NM_001001740:exon1:c.C104A:p.P35Q,RFWD2:NM_022457:exon1:c.C104A:p.P35Q	.	.	1q25.2	.	.	.	.	.	.	NA	PASS	-10	.	0.006	0.71	0.582	0	0.72	0	0.54	-0.38	0.373	4.646	24.5	0.977	0.831	-0.851	0.116	0.442	3.91	0.954	14.835	.	6,7	0.5	6	7	0.5
MCF7_Palbo_Res3	chr4_5797129_C_T	chr4	5797129	C	T	31	exonic	nonsynonymous_SNV	EVC	.	EVC:NM_001306090:exon14:c.C1994T:p.S665L,EVC:NM_153717:exon14:c.C1994T:p.S665L	.	.	4p16.2	1.918e-05	.	.	.	.	.	NA	PASS	-10	.	0.003	0.931	0.454	0.001	0.984	1.955	-0.23	-4.62	0.59	6.635	32	0.998	0.682	-0.46	0.271	0.732	4.13	0.892	12.606	.	4,27	0.818	4	27	0.818
MCF7_Palbo_Res3	chr8_22125446_C_A	chr8	22125446	C	A	63	exonic	stopgain	HR	.	HR:NM_005144:exon5:c.G1615T:p.E539X,HR:NM_018411:exon5:c.G1615T:p.E539X	.	.	8p21.3	.	.	.	.	.	.	NA	PASS	-10	.	.	.	.	0.018	1	.	.	.	.	10.382	36	0.997	0.597	.	.	0.517	4.11	0.935	11.88	.	20,42	0.666	20	42	0.666
MCF7_Palbo_Res3	chr15_43404503_C_T	chr15	43404503	C	T	53	exonic	stopgain	TUBGCP4	.	TUBGCP4:NM_001286414:exon17:c.C1942T:p.R648X,TUBGCP4:NM_014444:exon17:c.C1939T:p.R647X	.	.	15q15.3	.	.	.	.	.	.	NA	PASS	-10	.	.	.	.	0	1	.	.	.	.	14.49	46	0.996	0.955	.	.	0.707	5.73	0.935	14.128	.	27,23	0.5	27	23	0.5
MCF7_Palbo_Res3	chr16_11556736_C_A	chr16	11556736	C	A	32	splicing	.	LITAF	NM_004862:exon2:UTR5\x3bNM_001136473:exon2:UTR5\x3bNM_001136472:exon2:UTR5	.	.	.	16p13.13	.	.	.	.	.	.	NA	PASS	-10	.	.	.	.	.	1	.	.	.	.	5.077	25.3	0.995	0.968	.	.	0.295	5.13	0.852	16.104	.	15,16	0.5	15	16	0.5
MCF7_Palbo_Res3	chr17_75003545_C_T	chr17	75003545	C	T	64	exonic	nonsynonymous_SNV	CDR2L	.	CDR2L:NM_014603:exon5:c.C869T:p.P290L	.	.	17q25.1	.	.	.	.	.	.	NA	PASS	-10	.	0.778	0.002	0.009	0.526	1	1.01	1	0.32	0.221	2.628	20.4	0.952	0.825	-1.096	0.095	0.696	4.16	0.841	14.551	.	28,35	0.547	28	35	0.547
MCF7_Palbo_Res3	chr18_47594165_C_T	chr18	47594165	C	T	26	ncRNA_exonic	.	MIR4527HG	.	.	.	.	18q21.1	.	.	.	.	.	.	NA	PASS	-10	.	.	.	.	.	.	.	.	.	.	.	.	.	.	.	.	.	.	.	.	.	9,16	0.619	9	16	0.619
MCF7_Palbo_Res3	chr19_8885741_C_A	chr19	8885741	C	A	77	exonic	nonsynonymous_SNV	MUC16	.	MUC16:NM_024690:exon61:c.G41155T:p.D13719Y	.	.	19p13.2	.	.	.	.	.	.	NA	PASS	-10	.	0.005	0.998	0.994	0.003	1	2.985	0.84	-3.08	0.604	2.877	21.7	0.983	0.461	-0.505	0.268	0.554	1.17	-0.04	6.058	SEA_domain	25,50	0.672	25	50	0.672
MCF7_Palbo_Res3	chr19_10830234_C_T	chr19	10830234	C	T	29	exonic	nonsynonymous_SNV	DNM2	.	DNM2:NM_001005362:exon19:c.C2387T:p.A796V,DNM2:NM_004945:exon19:c.C2387T:p.A796V,DNM2:NM_001005360:exon20:c.C2399T:p.A800V,DNM2:NM_001005361:exon20:c.C2399T:p.A800V,DNM2:NM_001190716:exon20:c.C2399T:p.A800V	.	.	19p13.2	.	.	.	.	.	.	NA	PASS	-10	.	0.142	0.003	0.008	0.862	1	0.345	-3.06	-0.78	0.053	0.939	10.31	0.987	0.237	-0.379	0.538	0.672	3.11	0.847	6.879	.	3,26	0.857	3	26	0.857
MCF7_Palbo_Res3	chr19_19712464_G_T	chr19	19712464	G	T	22	exonic	nonsynonymous_SNV	ZNF14	.	ZNF14:NM_021030:exon4:c.C817A:p.H273N	.	.	19p13.11	.	.	.	.	.	.	NA	PASS	-10	.	0.016	1	1	.	0.987	3.39	-0.26	-6.65	0.181	4.644	24.5	0.975	0.037	-0.554	0.51	0.563	0.723	0.345	5.811	Zinc_finger_C2H2-type/integrase_DNA-binding_domain\x3bZinc_finger,_C2H2\x3bZinc_finger,_C2H2-like	9,12	0.556	9	12	0.556
MCF7_Palbo_Res3	chrX_103331554_G_A	chrX	103331554	G	A	63	exonic	nonsynonymous_SNV	TCEAL7	.	TCEAL7:NM_001348258:exon3:c.G151A:p.D51N,TCEAL7:NM_152278:exon3:c.G151A:p.D51N	.	.	Xq22.2	.	.	.	.	.	.	NA	PASS	-10	.	0	0.999	0.969	0.001	0.867	1.975	2.2	-3.61	0.279	6.311	29.2	0.999	0.605	-1.03	0.109	.	4.07	1.048	10.684	.	39,23	0.353	39	23	0.353
MCF7_Palbo_Res3	chr1_77169292_C_A	chr1	77169292	C	A	20	exonic	nonsynonymous_SNV	PIGK	.	PIGK:NM_005482:exon4:c.G343T:p.D115Y	.	.	1p31.1	.	.	.	.	.	.	NA	PASS	-10	.	0.001	0.966	0.937	0	1	3.03	0.8	-7.06	0.804	7.146	34	0.996	0.986	-0.312	0.317	0.693	5.29	0.935	19.321	.	12,8	0.412	12	8	0.412
MCF7_Palbo_Res3	chr1_151140043_C_T	chr1	151140043	C	T	159	exonic	nonsynonymous_SNV	SEMA6C	.	SEMA6C:NM_001178061:exon4:c.G166A:p.A56T,SEMA6C:NM_001178062:exon4:c.G166A:p.A56T,SEMA6C:NM_030913:exon4:c.G166A:p.A56T	.	.	1q21.3	.	.	.	.	.	.	NA	PASS	-10	.	1	0.321	0.09	0	0.575	-0.805	1.98	0.86	0.126	3.215	22.7	0.274	0.525	-0.951	0.007	0.706	3.83	0.935	10.629	Sema_domain	145,8	0.058	145	8	0.058
MCF7_Palbo_Res3	chr1_152309808_G_T	chr1	152309808	G	T	330	exonic	nonsynonymous_SNV	FLG	.	FLG:NM_002016:exon3:c.C5078A:p.T1693K	.	.	1q21.3	.	.	.	.	.	.	NA	PASS	-10	.	0.303	0.454	0.258	.	1	0	3.89	0.58	0.055	1.058	10.99	0.736	0.004	-0.991	0.002	0.554	-2.25	-2.964	13.642	.	288,29	0.094	288	29	0.094
MCF7_Palbo_Res3	chr3_25612607_C_G	chr3	25612607	C	G	93	exonic	nonsynonymous_SNV	TOP2B	.	TOP2B:NM_001068:exon28:c.G3679C:p.E1227Q,TOP2B:NM_001330700:exon28:c.G3694C:p.E1232Q	.	.	3p24.2	.	.	.	.	.	.	NA	PASS	-10	.	0.005	0.958	0.806	0	1	2.05	0.75	-2.04	0.712	6.414	29.7	0.998	0.99	-0.416	0.354	0.707	6.16	0.931	20.86	.	76,16	0.194	76	16	0.194
MCF7_Palbo_Res3	chr3_62491356_C_A	chr3	62491356	C	A	290	exonic	nonsynonymous_SNV	CADPS	.	CADPS:NM_183393:exon19:c.G2919T:p.E973D,CADPS:NM_183394:exon20:c.G3039T:p.E1013D,CADPS:NM_003716:exon21:c.G3009T:p.E1003D	.	.	3p14.2	.	.	.	.	.	.	NA	PASS	-10	.	0.025	0.982	0.969	0	1	2.195	1.39	-2.56	0.881	3.047	22.4	0.994	0.941	-0.516	0.312	0.615	3.54	0.017	10.75	Munc13_homology_1	280,7	0.025	280	7	0.025
MCF7_Palbo_Res3	chr4_38014723_G_GCCCCCCCCCCCCCCCCCCCCCCCCCCCCCCC	chr4	38014723	G	GCCCCCCCCCCCCCCCCCCCCCCCCCCCCCCC	57	exonic	frameshift_insertion	TBC1D1	.	TBC1D1:NM_001253912:exon3:c.632_633insCCCCCCCCCCCCCCCCCCCCCCCCCCCCCCC:p.R213Pfs*45,TBC1D1:NM_015173:exon3:c.632_633insCCCCCCCCCCCCCCCCCCCCCCCCCCCCCCC:p.R213Pfs*45	.	.	4p14	.	.	.	.	.	.	NA	PASS	-10	.	.	.	.	.	.	.	.	.	.	.	.	.	.	.	.	.	.	.	.	.	37,14	0.161	37	14	0.161
MCF7_Palbo_Res3	chr4_153592574_C_G	chr4	153592574	C	G	55	exonic	nonsynonymous_SNV	TMEM131L	.	TMEM131L:NM_001131007:exon18:c.C1912G:p.L638V,TMEM131L:NM_015196:exon18:c.C1909G:p.L637V	.	.	4q31.3	.	.	.	.	.	.	NA	PASS	-10	.	0.077	1	0.999	0	1	2.515	2.14	-0.73	0.48	3.264	22.8	0.995	0.935	-0.924	0.138	0.706	3.58	0.015	12.973	.	49,6	0.175	49	6	0.175
MCF7_Palbo_Res3	chr5_161334775_G_C	chr5	161334775	G	C	63	exonic	nonsynonymous_SNV	GABRB2	.	GABRB2:NM_000813:exon8:c.C809G:p.A270G,GABRB2:NM_021911:exon8:c.C809G:p.A270G	.	.	5q34	.	.	.	.	.	.	NA	PASS	-10	.	0.003	1	0.998	0	1	2.305	-2.48	-3.67	0.762	5.846	27.3	0.998	0.991	0.81	0.818	0.554	5.1	0.953	18.543	Neurotransmitter-gated_ion-channel_ligand-binding_domain\x3bNeurotransmitter-gated_ion-channel_transmembrane_domain	41,21	0.34	41	21	0.34
MCF7_Palbo_Res3	chr6_83138330_G_T	chr6	83138330	G	T	39	exonic	nonsynonymous_SNV	DOP1A	.	DOPEY1:NM_001199942:exon21:c.G4261T:p.V1421F,DOPEY1:NM_015018:exon21:c.G4288T:p.V1430F	.	.	6q14.1	.	.	.	.	.	.	NA	PASS	-10	.	0.002	0.999	0.996	0	1	1.445	1.09	-2.27	0.927	5.467	26.2	0.995	0.991	-0.837	0.191	0.651	6.04	1.048	20.644	.	32,6	0.137	32	6	0.137
MCF7_Palbo_Res3	chr7_149788627_C_T	chr7	149788627	C	T	140	exonic	nonsynonymous_SNV	SSPOP	.	SSPO:NM_198455:exon27:c.C4028T:p.P1343L	.	.	7q36.1	1.468e-05	.	.	.	.	.	NA	PASS	-10	.	.	0.013	0.002	.	.	.	.	.	0.133	0.632	8.377	0.649	0.161	.	.	0.096	2.13	0.066	4.697	.	131,6	0.057	131	6	0.057
MCF7_Palbo_Res3	chr8_56316167_C_A	chr8	56316167	C	A	161	exonic	nonsynonymous_SNV	SDR16C5	.	SDR16C5:NM_001318049:exon2:c.G181T:p.A61S,SDR16C5:NM_001318050:exon2:c.G181T:p.A61S,SDR16C5:NM_138969:exon2:c.G181T:p.A61S	ID\x3dCOSM403003\x3bOCCURENCE\x3d1(lung)	.	8q12.1	.	.	.	.	.	.	NA	PASS	-10	.	0.034	0.999	0.986	0	1	2.17	-2.51	-2.6	0.704	5.264	25.7	0.997	0.952	0.738	0.81	0.487	5.25	0.935	18.855	NAD(P)-binding_domain	147,10	0.066	147	10	0.066
MCF7_Palbo_Res3	chr8_132882589_C_T	chr8	132882589	C	T	85	exonic	nonsynonymous_SNV	TG	.	TG:NM_003235:exon7:c.C866T:p.S289L	.	.	8q24.22	.	.	.	.	.	.	NA	PASS	-10	.	1	0	0	0.028	1	-2.125	0.64	1.73	0.11	-0.613	0.116	0.154	0.041	-0.997	0.026	0.487	4.61	0.125	10.344	.	77,8	0.106	77	8	0.106
MCF7_Palbo_Res3	chr10_87190582_C_A	chr10	87190582	C	A	81	exonic	nonsynonymous_SNV	SHLD2	.	FAM35A:NM_019054:exon9:c.C2407A:p.L803I,FAM35A:NM_001330112:exon10:c.C2614A:p.L872I	.	.	10q23.2	.	.	.	.	.	.	NA	PASS	-10	.	0.265	0.983	0.877	0.086	0.999	1.87	1.84	-1.17	0.222	3.47	23	0.991	0.866	-0.946	0.169	0.732	2.61	0.802	11.48	.	63,15	0.225	63	15	0.225
MCF7_Palbo_Res3	chr11_70820518_G_A	chr11	70820518	G	A	26	exonic	nonsynonymous_SNV	SHANK2	.	SHANK2:NM_012309:exon11:c.C1339T:p.P447S	.	.	11q13.4	.	.	.	.	.	.	NA	PASS	-10	.	0.085	1	0.999	0.055	1	2.125	2.34	-1.98	0.453	2.811	21.4	0.999	0.988	-0.854	0.32	0.646	4.19	0.974	16.901	.	19,7	0.286	19	7	0.286
MCF7_Palbo_Res3	chr11_94998522_C_T	chr11	94998522	C	T	89	exonic	nonsynonymous_SNV	KDM4D	.	KDM4D:NM_018039:exon3:c.C1150T:p.H384Y	.	.	11q21	.	.	.	.	.	.	NA	PASS	-10	.	1	0.584	0.089	0	1	0.345	1.68	-0.59	0.124	1.579	13.73	0.938	0.052	-1.038	0.029	0.615	0.537	0.87	6.072	.	78,10	0.113	78	10	0.113
MCF7_Palbo_Res3	chr14_45006145_G_T	chr14	45006145	G	T	133	exonic	nonsynonymous_SNV	TOGARAM1	.	TOGARAM1:NM_001308120:exon5:c.G2782T:p.D928Y,TOGARAM1:NM_015091:exon5:c.G2782T:p.D928Y	.	.	14q21.2	.	.	.	.	.	.	NA	PASS	-10	.	0.001	0.904	0.542	0.157	0.911	0.695	2.46	-2.23	0.582	5.405	26	0.994	0.823	-1.032	0.089	0.615	4.49	1.048	8.152	.	117,15	0.13	117	15	0.13
MCF7_Palbo_Res3	chr14_69779210_GAACAT_G	chr14	69779210	GAACAT	G	46	exonic	frameshift_deletion	SLC10A1	.	SLC10A1:NM_003049:exon3:c.713_717del:p.Y238Sfs*38	.	.	14q24.1	.	.	.	.	.	.	NA	PASS	-10	.	.	.	.	.	.	.	.	.	.	.	.	.	.	.	.	.	.	.	.	.	37,7	0.167	37	7	0.167
MCF7_Palbo_Res3	chr16_29084760_T_C	chr16	29084760	T	C	50	ncRNA_exonic	.	RRN3P2	.	.	.	.	16p11.2	.	.	.	.	.	.	NA	PASS	-10	.	.	.	.	.	.	.	.	.	.	.	.	.	.	.	.	.	.	.	.	.	38,10	0.256	38	10	0.256
MCF7_Palbo_Res3	chr16_88429760_C_T	chr16	88429760	C	T	64	exonic	nonsynonymous_SNV	ZNF469	.	ZNF469:NM_001127464:exon1:c.C2290T:p.H764Y	.	.	16q24.2	.	.	.	.	.	.	NA	PASS	-10	.	0.34	0.871	0.246	.	1	0.345	3.35	-1.41	0.1	0.069	3.282	0.98	0.035	-0.955	0.011	0.583	2.61	-0.012	6.677	.	57,6	0.115	57	6	0.115
MCF7_Palbo_Res3	chr17_1728449_G_A	chr17	1728449	G	A	80	exonic	nonsynonymous_SNV	WDR81	.	WDR81:NM_001163809:exon1:c.G3490A:p.V1164M,WDR81:NM_152348:exon2:c.G337A:p.V113M	.	.	17p13.3	.	.	.	.	.	.	NA	PASS	-10	.	0.149	0.232	0.118	0.47	1	0.695	2.43	-0.25	0.279	0.566	7.916	0.918	0.787	-0.939	0.102	0.672	4.83	0.12	13.043	.	61,17	0.213	61	17	0.213
MCF7_Palbo_Res3	chr17_11619581_A_G	chr17	11619581	A	G	83	exonic	nonsynonymous_SNV	DNAH9	.	DNAH9:NM_001372:exon6:c.A1150G:p.R384G	.	.	17p12	.	.	.	.	.	.	NA	PASS	-10	.	0.087	0.741	0.41	0.006	0.917	1.01	0.45	-4.09	0.323	3.395	23	0.997	0.993	-0.909	0.153	0.487	6.07	1.199	16.29	Dynein_heavy_chain,_domain-1	69,8	0.111	69	8	0.111
MCF7_Palbo_Res3	chr17_56594465_C_T	chr17	56594465	C	T	226	exonic	nonsynonymous_SNV	NOG	.	NOG:NM_005450:exon1:c.C242T:p.T81I	.	.	17q22	.	.	.	.	.	.	NA	PASS	-10	.	1	0	0.001	0.001	0.996	-1.585	-4.38	2.09	0.159	-0.186	1.172	0.931	0.457	-0.281	0.498	0.598	2.44	0.07	7.46	Cystine-knot_cytokine	205,16	0.076	205	16	0.076
MCF7_Palbo_Res3	chr19_18388319_G_A	chr19	18388319	G	A	19	exonic	nonsynonymous_SNV	GDF15	.	GDF15:NM_004864:exon2:c.G311A:p.R104H	.	.	19p13.11	1.98e-05	.	.	.	.	.	NA	PASS	-10	.	0.001	0.976	0.513	0.315	1	1.845	-1.59	-2.25	0.301	3.721	23.3	0.998	0.194	-0.536	0.409	0.726	0.362	0.899	1.899	.	13,6	0.278	13	6	0.278
MCF7_Palbo_Res3	chr19_40717577_G_C	chr19	40717577	G	C	185	exonic	nonsynonymous_SNV	ITPKC	.	ITPKC:NM_025194:exon1:c.G442C:p.D148H	.	.	19q13.2	.	.	.	.	.	.	NA	PASS	-10	.	0.003	0.435	0.219	0.282	0.987	0.695	.	-1.04	0.205	2.113	16.94	0.96	0.092	-1.052	0.06	0.628	3.65	0.902	7.333	.	132,51	0.268	132	51	0.268
MCF7_Palbo_Res3	chr22_17818137_CTCCTCTCTGGGG_C	chr22	17818137	CTCCTCTCTGGGG	C	43	exonic	nonframeshift_deletion	MICAL3	.	MICAL3:NM_015241:exon26:c.4512_4523del:p.P1505_E1508del	.	.	22q11.21	.	.	.	.	.	.	NA	PASS	-10	.	.	.	.	.	.	.	.	.	.	.	.	.	.	.	.	.	.	.	.	.	29,12	0.325	29	12	0.325
T47D_Abe_Res1	chr5_108381499_C_A	chr5	108381499	C	A	15	exonic	nonsynonymous_SNV	FBXL17	.	FBXL17:NM_001163315:exon1:c.G193T:p.V65L	.	.	5q21.3	.	.	.	.	.	.	NA	PASS	-10	.	0	0.981	0.964	.	0.931	0.695	-1.59	-0.47	0.281	5.042	25.2	0.988	0.666	-0.094	0.505	0.025	2.78	0.733	11.557	.	4,11	0.615	4	11	0.615
T47D_Abe_Res1	chr6_24583700_T_C	chr6	24583700	T	C	50	exonic	nonsynonymous_SNV	KIAA0319	.	KIAA0319:NM_001168376:exon4:c.A862G:p.K288E,KIAA0319:NM_001350404:exon4:c.A979G:p.K327E,KIAA0319:NM_001350406:exon4:c.A862G:p.K288E,KIAA0319:NM_001168375:exon5:c.A997G:p.K333E,KIAA0319:NM_001168377:exon5:c.A997G:p.K333E,KIAA0319:NM_001350403:exon5:c.A997G:p.K333E,KIAA0319:NM_001350407:exon5:c.A997G:p.K333E,KIAA0319:NM_001350408:exon5:c.A997G:p.K333E,KIAA0319:NM_014809:exon5:c.A997G:p.K333E,KIAA03…	ID\x3dCOSM1672264\x3bOCCURENCE\x3d1(breast)	.	6p22.3	.	.	.	.	.	.	NA	PASS	-10	.	0.024	0.001	0.007	0.026	1	2.255	3.04	-2.06	0.204	2.483	19.36	0.978	0.066	-0.991	0.011	0.649	-2.09	0.043	5.957	Fibronectin_type_III	20,28	0.59	20	28	0.59
T47D_Abe_Res1	chr9_76711049_G_T	chr9	76711049	G	T	139	exonic	nonsynonymous_SNV	PRUNE2	.	PRUNE2:NM_001308047:exon8:c.C1225A:p.L409I,PRUNE2:NM_001308048:exon8:c.C1225A:p.L409I,PRUNE2:NM_015225:exon8:c.C1225A:p.L409I	.	.	9q21.2	.	.	.	.	.	.	NA	PASS	-10	.	0.001	1	0.96	0	0.989	0.975	0.64	-0.82	0.336	4.508	24.3	0.996	0.952	-0.711	0.217	0.554	5.64	1.048	10.467	.	78,60	0.43	78	60	0.43
T47D_Abe_Res1	chr17_81914641_G_A	chr17	81914641	G	A	90	exonic	nonsynonymous_SNV	SIRT7	.	SIRT7:NM_016538:exon6:c.C542T:p.T181M	.	0.000199681	17q25.3	0.0007	.	.	.	.	.	NA	PASS	-10	0.0001	0.106	0.24	0.105	0.367	1	1.83	2.26	-1.13	0.137	0.876	9.925	0.95	0.421	-1.023	0.038	0.707	2.08	0.94	4.777	DHS-like_NAD/FAD-binding_domain\x3bSirtuin_family,_catalytic_core_domain	3,86	0.955	3	86	0.955
T47D_Abe_Res1	chrX_48700557_T_A	chrX	48700557	T	A	72	exonic	nonsynonymous_SNV	SUV39H1	.	SUV39H1:NM_001282166:exon3:c.T665A:p.V222E,SUV39H1:NM_003173:exon3:c.T632A:p.V211E	.	.	Xp11.23	.	.	.	.	.	.	NA	PASS	-10	.	0.001	0.997	0.974	0	1	2.365	-1.13	-5.03	0.94	6.199	28.7	0.992	0.994	0.281	0.599	.	5.06	1.059	11.735	Pre-SET_domain\x3bPre-SET_zinc-binding_sub-group	32,38	0.523	32	38	0.523
T47D_Abe_Res1	chr1_827106_A_C	chr1	827106	A	C	43	ncRNA_exonic	.	LINC00115	.	.	.	.	1p36.33	.	.	.	.	.	.	NA	PASS	-10	.	.	.	.	.	.	.	.	.	.	.	.	.	.	.	.	.	.	.	.	.	28,13	0.297	28	13	0.297
T47D_Abe_Res1	chr1_44813387_G_GCCACTGCACTCCAGCCTGAGATTGTGCCACTGCACTCCAGCCACTGCACTCCA	chr1	44813387	G	GCCACTGCACTCCAGCCTGAGATTGTGCCACTGCACTCCAGCCACTGCACTCCA	77	exonic	stopgain	BTBD19	.	BTBD19:NM_001136537:exon7:c.629_630insCCACTGCACTCCAGCCTGAGATTGTGCCACTGCACTCCAGCCACTGCACTCCA:p.P211Hfs*6	.	.	1p34.1	.	.	.	.	.	.	NA	PASS	-10	.	.	.	.	.	.	.	.	.	.	.	.	.	.	.	.	.	.	.	.	.	65,12	0.195	65	12	0.195
T47D_Abe_Res1	chr1_151400462_G_T	chr1	151400462	G	T	87	exonic	nonsynonymous_SNV	PSMB4	.	PSMB4:NM_002796:exon3:c.G368T:p.G123V	.	.	1q21.3	.	.	.	.	.	.	NA	PASS	-10	.	0.025	0.87	0.811	0	1	1.445	2.02	-3.6	0.675	4.967	25.1	0.996	0.957	-1.171	0.068	0.628	5.71	1.048	16.587	Nucleophile_aminohydrolases,_N-terminal	77,8	0.095	77	8	0.095
T47D_Abe_Res1	chr1_152308557_C_T	chr1	152308557	C	T	276	exonic	nonsynonymous_SNV	FLG	.	FLG:NM_002016:exon3:c.G6329A:p.S2110N	.	.	1q21.3	0.0002	.	.	.	.	.	NA	PASS	-10	.	0.102	0.652	0.161	.	1	2.42	4.65	-0.77	0.03	0.962	10.44	0.602	0.004	-0.938	0.002	0.554	-1.66	-0.045	2.497	.	249,16	0.068	249	16	0.068
T47D_Abe_Res1	chr1_177276277_G_T	chr1	177276277	G	T	196	exonic	nonsynonymous_SNV	BRINP2	.	BRINP2:NM_021165:exon6:c.G855T:p.E285D	.	.	1q25.2	.	.	.	.	.	.	NA	PASS	-10	.	0.009	0.961	0.689	0	0.996	2.11	2.32	-2.08	0.443	3.483	23.1	0.996	0.906	-1.125	0.058	0.581	1.68	0.135	5.016	.	174,17	0.101	174	17	0.101
T47D_Abe_Res1	chr1_206770943_C_A	chr1	206770943	C	A	185	exonic	nonsynonymous_SNV	IL10	.	IL10:NM_000572:exon3:c.G342T:p.E114D	ID\x3dCOSM174226\x3bOCCURENCE\x3d1(large_intestine)	.	1q32.1	.	.	.	.	.	.	NA	PASS	-10	.	0.118	0.979	0.971	0.006	1	2.54	-0.5	-0.41	0.089	-0.494	0.227	0.917	0.181	-0.37	0.383	0.447	-12	-1.156	11.221	Four-helical_cytokine,_core\x3bFour-helical_cytokine-like,_core	151,27	0.161	151	27	0.161
T47D_Abe_Res1	chr1_243164852_G_C	chr1	243164852	G	C	88	exonic	nonsynonymous_SNV	CEP170	.	CEP170:NM_001042404:exon12:c.C2814G:p.I938M,CEP170:NM_001042405:exon12:c.C2814G:p.I938M,CEP170:NM_014812:exon13:c.C3108G:p.I1036M	.	.	1q43	.	.	.	.	.	.	NA	PASS	-10	.	0.184	0.999	0.998	0	0.981	1.39	0.83	-0.79	0.391	3.451	23	0.994	0.834	-0.923	0.177	0.732	-0.992	-0.787	10.349	CEP170,_C-terminal	73,11	0.114	73	11	0.114
T47D_Abe_Res1	chr2_5693155_G_A	chr2	5693155	G	A	47	exonic	nonsynonymous_SNV	SOX11	.	SOX11:NM_003108:exon1:c.G434A:p.G145D	.	.	2p25.2	.	.	.	.	.	.	NA	PASS	-10	.	0.434	0.099	0.017	.	1	0.69	-4.65	-1.45	0.274	0.509	7.501	0.976	0.75	0.022	0.756	0.733	0.692	0.484	7.29	.	34,10	0.23	34	10	0.23
T47D_Abe_Res1	chr2_27435180_G_T	chr2	27435180	G	T	83	exonic	nonsynonymous_SNV	NRBP1	.	NRBP1:NM_001321363:exon6:c.G518T:p.C173F,NRBP1:NM_001321358:exon7:c.G614T:p.C205F,NRBP1:NM_001321359:exon7:c.G614T:p.C205F,NRBP1:NM_001321361:exon7:c.G614T:p.C205F,NRBP1:NM_001321362:exon7:c.G614T:p.C205F,NRBP1:NM_013392:exon7:c.G614T:p.C205F,NRBP1:NM_001321357:exon8:c.G614T:p.C205F	.	.	2p23.3	.	.	.	.	.	.	NA	PASS	-10	.	0.001	0.996	0.969	0	1	3.895	-0.75	-8.49	0.979	5.904	27.5	0.992	0.981	0.701	0.718	0.707	5.62	1.048	18.198	Protein_kinase_domain\x3bProtein_kinase-like_domain	68,14	0.179	68	14	0.179
T47D_Abe_Res1	chr2_135217592_G_A	chr2	135217592	G	A	41	exonic	stopgain	ZRANB3	.	ZRANB3:NM_001286568:exon17:c.C2362T:p.R788X,ZRANB3:NM_032143:exon17:c.C2368T:p.R790X,ZRANB3:NM_001286569:exon18:c.C1006T:p.R336X	.	.	2q21.3	1.94e-05	.	.	.	.	.	NA	PASS	-10	.	.	.	.	0.002	1	.	.	.	.	15.088	49	0.997	0.917	.	.	0.638	5.86	1.048	13.124	P-loop_containing_nucleoside_triphosphate_hydrolase\x3bSNF2-related	29,11	0.294	29	11	0.294
T47D_Abe_Res1	chr3_17011833_T_A	chr3	17011833	T	A	90	exonic	nonsynonymous_SNV	PLCL2	.	PLCL2:NM_001144382:exon2:c.T2487A:p.F829L,PLCL2:NM_015184:exon2:c.T2109A:p.F703L	.	.	3p24.3	.	.	.	.	.	.	NA	PASS	-10	.	0	0.999	0.99	0	1	.	2.69	-5.34	0.849	5.2	25.5	0.997	0.511	-0.776	0.202	0.707	-4.01	-0.272	12.409	C2_domain\x3bPLC-like_phosphodiesterase,_TIM_beta/alpha-barrel_domain\x3bPhospholipase_C,_phosphatidylinositol-specific,_Y_domain	66,19	0.235	66	19	0.235
T47D_Abe_Res1	chr3_58077251_AG_A	chr3	58077251	AG	A	90	exonic	frameshift_deletion	FLNB	.	FLNB:NM_001164317:exon2:c.499delG:p.D167Tfs*9,FLNB:NM_001164318:exon2:c.499delG:p.D167Tfs*9,FLNB:NM_001164319:exon2:c.499delG:p.D167Tfs*9,FLNB:NM_001457:exon2:c.499delG:p.D167Tfs*9	.	.	3p14.3	.	.	.	.	.	.	NA	PASS	-10	.	.	.	.	.	.	.	.	.	.	.	.	.	.	.	.	.	.	.	.	.	64,19	0.249	64	19	0.249
T47D_Abe_Res1	chr3_136349332_G_T	chr3	136349332	G	T	56	exonic	nonsynonymous_SNV	STAG1	.	STAG1:NM_005862:exon29:c.C3097A:p.Q1033K	.	.	3q22.3	.	.	.	.	.	.	NA	PASS	-10	.	0.502	0.151	0.066	0	1	1.975	1.95	-1.09	0.427	1.825	15.14	0.98	0.977	-1.002	0.086	0.732	6.17	1.048	20.879	.	46,10	0.22	46	10	0.22
T47D_Abe_Res1	chr6_26422161_C_A	chr6	26422161	C	A	78	ncRNA_exonic	.	BTN2A3P	.	.	.	.	6p22.2	.	.	.	.	.	.	NA	PASS	-10	.	.	.	.	.	.	.	.	.	.	.	.	.	.	.	.	.	.	.	.	.	68,10	0.143	68	10	0.143
T47D_Abe_Res1	chr6_166430462_A_T	chr6	166430462	A	T	29	exonic	nonsynonymous_SNV	RPS6KA2	.	RPS6KA2:NM_001318937:exon14:c.T1278A:p.H426Q,RPS6KA2:NM_001318938:exon16:c.T1305A:p.H435Q,RPS6KA2:NM_021135:exon16:c.T1572A:p.H524Q,RPS6KA2:NM_001006932:exon17:c.T1596A:p.H532Q,RPS6KA2:NM_001318936:exon18:c.T1647A:p.H549Q	.	.	6q27	.	.	.	.	.	.	NA	PASS	-10	.	0	1	0.996	0	1	3.365	-1.86	-6.7	0.731	4.897	24.9	0.989	0.763	0.405	0.702	0.707	-0.549	0.082	9.303	Protein_kinase_domain\x3bProtein_kinase-like_domain\x3bSerine/threonine/dual_specificity_protein_kinase,_catalytic__domain	23,6	0.262	23	6	0.262
T47D_Abe_Res1	chr7_38685591_T_G	chr7	38685591	T	G	80	ncRNA_exonic	.	FAM183BP	.	.	.	.	7p14.1	.	.	.	.	.	.	NA	PASS	-10	.	.	.	.	.	.	.	.	.	.	.	.	.	.	.	.	.	.	.	.	.	69,6	0.086	69	6	0.086
T47D_Abe_Res1	chr9_87921300_C_G	chr9	87921300	C	G	103	exonic	nonsynonymous_SNV	SPATA31C1	.	SPATA31C1:NM_001145124:exon4:c.C1393G:p.Q465E	.	.	9q22.1	.	.	.	.	.	.	NA	PASS	-10	.	.	.	.	.	.	.	.	.	.	.	.	.	.	.	.	.	.	.	.	.	79,21	0.215	79	21	0.215
T47D_Abe_Res1	chr9_101670220_G_C	chr9	101670220	G	C	59	exonic	nonsynonymous_SNV	GRIN3A	.	GRIN3A:NM_133445:exon3:c.C2192G:p.T731R	.	.	9q31.1	.	.	.	.	.	.	NA	PASS	-10	.	0.001	1	0.999	0	1	2.505	0.62	-4.93	0.877	5.243	25.6	0.994	0.987	-0.387	0.343	0.487	5.39	0.998	19.591	Ionotropic_glutamate_receptor	42,17	0.286	42	17	0.286
T47D_Abe_Res1	chr9_130104451_A_G	chr9	130104451	A	G	320	exonic	nonsynonymous_SNV	GPR107	.	GPR107:NM_001136557:exon13:c.A1163G:p.E388G,GPR107:NM_001136558:exon13:c.A1163G:p.E388G,GPR107:NM_001287346:exon13:c.A596G:p.E199G,GPR107:NM_020960:exon13:c.A1163G:p.E388G	.	.	9q34.11	.	.	.	.	.	.	NA	PASS	-10	.	0.004	1	1	0	1	1.01	1.74	-6.23	0.941	5.032	25.2	0.999	0.949	-1.082	0.102	0.707	5.2	1.14	14.187	.	263,50	0.151	263	50	0.151
T47D_Abe_Res1	chr11_45914347_C_G	chr11	45914347	C	G	107	exonic	nonsynonymous_SNV	PEX16	.	PEX16:NM_004813:exon7:c.G663C:p.E221D,PEX16:NM_057174:exon7:c.G663C:p.E221D	.	.	11p11.2	.	.	.	.	.	.	NA	PASS	-10	.	0.023	1	1	0	1	3.055	0.98	-2.63	0.96	5.578	26.4	0.998	0.948	-0.443	0.289	0.707	2.91	0.91	10.648	.	94,9	0.104	94	9	0.104
T47D_Abe_Res1	chr11_110580951_G_T	chr11	110580951	G	T	66	exonic	stopgain	ARHGAP20	.	ARHGAP20:NM_001258415:exon15:c.C1926A:p.Y642X,ARHGAP20:NM_001258417:exon15:c.C1887A:p.Y629X,ARHGAP20:NM_001258418:exon15:c.C1887A:p.Y629X,ARHGAP20:NM_001258416:exon16:c.C1917A:p.Y639X,ARHGAP20:NM_020809:exon16:c.C1995A:p.Y665X	.	.	11q22.3	.	.	.	.	.	.	NA	PASS	-10	.	.	.	.	0.152	1	.	.	.	.	7.903	35	0.983	0.268	.	.	0.638	1.29	1.048	8.409	Ras-association\x3bUbiquitin-related_domain	53,11	0.189	53	11	0.189
T47D_Abe_Res1	chr12_121822891_G_A	chr12	121822891	G	A	61	exonic	nonsynonymous_SNV	SETD1B	.	SETD1B:NM_015048:exon12:c.G4183A:p.E1395K	.	.	12q24.31	.	.	.	.	.	.	NA	PASS	-10	.	0.003	0.996	0.565	0	1	1.845	0.9	-2.51	0.455	3.226	22.8	0.994	0.942	-0.882	0.152	0.707	4.91	0.949	18.469	.	45,14	0.265	45	14	0.265
T47D_Abe_Res1	chr12_122702193_TAAGGA_T	chr12	122702193	TAAGGA	T	420	exonic	frameshift_deletion	HCAR2	.	HCAR2:NM_177551:exon1:c.1086_1090del:p.P363Nfs*26	.	.	12q24.31	.	.	.	.	.	.	NA	PASS	-10	0.0003	.	.	.	.	.	.	.	.	.	.	.	.	.	.	.	.	.	.	.	.	400,8	0.028	400	8	0.028
T47D_Abe_Res1	chr12_123436366_C_G	chr12	123436366	C	G	51	exonic	nonsynonymous_SNV	RILPL2	.	RILPL2:NM_145058:exon1:c.G55C:p.E19Q	.	.	12q24.31	.	.	.	.	.	.	NA	PASS	-10	.	0.446	0.028	0.007	0.702	1	0.345	0.89	-0.09	0.139	0.849	9.765	0.884	0.697	-1.109	0.067	0.685	4.2	0.919	14.024	.	43,8	0.183	43	8	0.183
T47D_Abe_Res1	chr16_70177476_C_T	chr16	70177476	C	T	111	exonic	nonsynonymous_SNV	CLEC18C	.	CLEC18C:NM_173619:exon3:c.C452T:p.T151M	.	0.00399361	16q22.1	0.014	.	.	.	.	.	NA	PASS	-10	0.0097	0.019	0.998	0.861	0	1	3.765	2.37	-5.35	0.84	5.596	26.5	0.998	0.909	-0.61	0.155	0.554	4.32	0.8	12.696	CAP_domain	100,6	0.049	100	6	0.049
T47D_Abe_Res1	chr16_84181845_G_A	chr16	84181845	G	A	115	exonic	nonsynonymous_SNV	TAF1C	.	TAF1C:NM_005679:exon8:c.C935T:p.S312F,TAF1C:NM_001243156:exon9:c.C857T:p.S286F,TAF1C:NM_139353:exon9:c.C656T:p.S219F	.	.	16q24.1	.	.	.	.	.	.	NA	PASS	-10	.	0.001	1	0.998	0.001	1	2.24	-0.08	-3.6	0.811	6.164	28.5	0.998	0.938	-0.152	0.412	0.707	4.6	1.048	12.81	WD40-repeat-containing_domain\x3bWD40/YVTN_repeat-like-containing_domain	92,19	0.176	92	19	0.176
T47D_Abe_Res1	chr17_8231728_C_T	chr17	8231728	C	T	102	exonic	nonsynonymous_SNV	CTC1	.	CTC1:NM_025099:exon14:c.G2473A:p.A825T	ID\x3dCOSM1198257\x3bOCCURENCE\x3d1(large_intestine)	.	17p13.1	.	.	.	.	.	.	NA	PASS	-10	.	0.187	0.002	0.001	0.994	1	-1.1	-1.59	0.33	0.201	0.171	4.372	0.636	0.016	-0.965	0.154	0.707	-5.18	-2.251	1.167	.	68,27	0.3	68	27	0.3
T47D_Abe_Res1	chr17_75239433_CG_C	chr17	75239433	CG	C	55	exonic	frameshift_deletion	GGA3	.	GGA3:NM_001291642:exon11:c.1355delC:p.P452Rfs*26,GGA3:NM_001172704:exon13:c.1355delC:p.P452Rfs*26,GGA3:NM_014001:exon13:c.1622delC:p.P541Rfs*26,GGA3:NM_001172703:exon14:c.1505delC:p.P502Rfs*26,GGA3:NM_138619:exon14:c.1721delC:p.P574Rfs*26,GGA3:NM_001291641:exon15:c.1505delC:p.P502Rfs*26	.	.	17q25.1	.	.	.	.	.	.	NA	PASS	-10	.	.	.	.	.	.	.	.	.	.	.	.	.	.	.	.	.	.	.	.	.	43,10	0.213	43	10	0.213
T47D_Abe_Res1	chr17_75813853_G_T	chr17	75813853	G	T	139	exonic	nonsynonymous_SNV	UNK	.	UNK:NM_001080419:exon6:c.G851T:p.R284L	.	.	17q25.1	.	.	.	.	.	.	NA	PASS	-10	.	.	0.999	0.993	0	1	2.665	.	.	0.93	7.603	34	0.999	0.993	-0.132	0.501	0.707	4.83	1.048	18.147	Zinc_finger,_CCCH-type	120,16	0.124	120	16	0.124
T47D_Abe_Res1	chr17_78514887_C_G	chr17	78514887	C	G	124	exonic	nonsynonymous_SNV	DNAH17	.	DNAH17:NM_173628:exon26:c.G4000C:p.V1334L	.	.	17q25.3	.	.	.	.	.	.	NA	PASS	-10	.	.	.	.	.	0.998	-0.705	0.14	.	0.386	1.162	11.55	0.9	0.419	-1.03	0.057	0.487	2.27	-0.979	4.58	Dynein_heavy_chain,_domain-2	106,13	0.11	106	13	0.11
T47D_Abe_Res1	chr18_10485612_C_T	chr18	10485612	C	T	85	exonic	nonsynonymous_SNV	APCDD1	.	APCDD1:NM_153000:exon4:c.C925T:p.L309F	.	.	18p11.22	.	.	.	.	.	.	NA	PASS	-10	.	0.003	1	0.998	0	1	2.215	1.74	-4	0.832	5.973	27.7	0.999	0.966	-0.859	0.151	0.516	4.07	0.935	12.452	APCDD1_domain	53,28	0.306	53	28	0.306
T47D_Abe_Res1	chr20_36815338_C_A	chr20	36815338	C	A	380	exonic	stopgain	SOGA1	.	SOGA1:NM_080627:exon5:c.G2104T:p.E702X,SOGA1:NM_199181:exon5:c.G1390T:p.E464X	.	.	20q11.23	.	.	.	.	.	.	NA	PASS	-10	.	.	.	.	0	1	.	.	.	.	12.204	38	0.998	0.956	.	.	0.707	4.86	0.852	16.921	.	323,48	0.125	323	48	0.125
T47D_Abe_Res1	chr20_62813188_A_C	chr20	62813188	A	C	43	exonic	nonsynonymous_SNV	OGFR	.	OGFR:NM_007346:exon7:c.A1573C:p.S525R	.	0.0179712	20q13.33	0.0012	.	.	.	.	.	NA	PASS	-10	0.0047	0.007	0.985	0.881	.	1	0	2.62	-1.07	0.066	0.929	10.25	0.983	0.083	-1.028	0	0.672	-1.64	-0.316	5.187	.	27,14	0.384	27	14	0.384
T47D_Abe_Res1	chrX_24312115_CA_AT	chrX	24312115	CA	AT	119	exonic	nonframeshift_substitution	SUPT20HL2	.	SUPT20HL2:NM_001136233:exon1:c.1200_1201delinsAT:p.D400_A401delinsES	.	.	Xp22.11	.	.	.	.	.	.	NA	PASS	-10	.	.	.	.	.	.	.	.	.	.	.	.	.	.	.	.	.	.	.	.	.	85,30	0.259	85	30	0.259
T47D_Abe_Res1	chrX_48109964_G_C	chrX	48109964	G	C	59	ncRNA_exonic	.	SSX6P	.	.	.	.	Xp11.23	.	.	.	.	.	.	NA	PASS	-10	.	.	.	.	.	.	.	.	.	.	.	.	.	.	.	.	.	.	.	.	.	46,12	0.2	46	12	0.2
T47D_Abe_Res2	chr3_44594608_T_C	chr3	44594608	T	C	64	exonic	nonsynonymous_SNV	ZNF660	.	ZNF660:NM_173658:exon3:c.T415C:p.C139R	ID\x3dCOSM1670105\x3bOCCURENCE\x3d1(breast)	.	3p21.31	9.422e-06	.	.	.	.	.	NA	PASS	-10	.	0	1	0.999	.	1	4.16	-2.05	-12	0.824	5.069	25.3	0.997	0.948	0.912	0.836	0.638	4.21	1.061	12.672	Zinc_finger_C2H2-type/integrase_DNA-binding_domain\x3bZinc_finger,_C2H2\x3bZinc_finger,_C2H2-like	24,39	0.571	24	39	0.571
T47D_Abe_Res2	chr12_48066956_G_T	chr12	48066956	G	T	20	exonic	nonsynonymous_SNV	SENP1	.	SENP1:NM_001267594:exon10:c.C1005A:p.F335L,SENP1:NM_001267595:exon10:c.C1005A:p.F335L	.	.	12q13.11	.	.	.	.	.	.	NA	PASS	-10	.	0.023	0.928	0.608	0	1	0.805	2.45	-0.53	0.52	5.211	25.6	0.998	0.945	-1.091	0.034	0.706	2.83	0.132	5.902	.	6,14	0.647	6	14	0.647
T47D_Abe_Res2	chr1_156295645_T_A	chr1	156295645	T	A	59	exonic	startloss	GLMP	.	GLMP:NM_001256604:exon1:c.A1T:p.M1?,GLMP:NM_001256605:exon1:c.A1T:p.M1?,GLMP:NM_001256608:exon1:c.A1T:p.M1?,GLMP:NM_144580:exon1:c.A1T:p.M1?	.	.	1q22	.	.	.	.	.	.	NA	PASS	-10	.	0	0.102	0.015	0.004	1	.	2.12	-0.65	0.909	3.574	23.2	0.759	0.787	-1.083	0.026	0.726	2.51	1.049	6.875	.	47,11	0.16	47	11	0.16
T47D_Abe_Res2	chr2_98217871_T_C	chr2	98217871	T	C	25	exonic	nonsynonymous_SNV	VWA3B	.	VWA3B:NM_001345864:exon8:c.T833C:p.V278A,VWA3B:NM_144992:exon14:c.T1862C:p.V621A	.	.	2q11.2	.	.	.	.	.	.	NA	PASS	-10	.	0.054	0.957	0.705	0.001	1	1.505	3.01	-2.72	0.371	1.522	13.43	0.967	0.449	-1.1	0.037	0.497	3.42	0.964	7.943	von_Willebrand_factor,_type_A	7,18	0.652	7	18	0.652
T47D_Abe_Res2	chr3_177442042_C_T	chr3	177442042	C	T	142	ncRNA_exonic	.	LINC00578	.	.	.	.	3q26.32	.	.	.	.	.	.	NA	PASS	-10	.	.	.	.	.	.	.	.	.	.	.	.	.	.	.	.	.	.	.	.	.	124,16	0.116	124	16	0.116
T47D_Abe_Res2	chr5_160617942_T_G	chr5	160617942	T	G	33	exonic	nonsynonymous_SNV	ATP10B	.	ATP10B:NM_025153:exon16:c.A2448C:p.R816S	.	.	5q34	.	.	.	.	.	.	NA	PASS	-10	.	0.101	0.565	0.355	0.005	0.983	0.775	-0.25	-2.03	0.274	2.897	21.8	0.971	0.577	-0.946	0.175	0.554	2.99	-0.022	8.601	P-type_ATPase,_cytoplasmic_domain_N	15,18	0.556	15	18	0.556
T47D_Abe_Res2	chr6_29462174_C_A	chr6	29462174	C	A	87	exonic	nonsynonymous_SNV	OR2H1	.	OR2H1:NM_001318014:exon4:c.C405A:p.H135Q,OR2H1:NM_001318022:exon4:c.C405A:p.H135Q,OR2H1:NM_030883:exon4:c.C405A:p.H135Q	.	.	6p22.1	.	.	.	.	.	.	NA	PASS	-10	.	0.005	0.922	0.556	0.015	1	1.935	5.01	-6.13	0.125	4.152	23.8	0.948	0.152	-0.899	0.004	0.487	2.03	-0.045	6.049	GPCR,_rhodopsin-like,_7TM	67,14	0.177	67	14	0.177
T47D_Abe_Res2	chr6_142088571_G_T	chr6	142088571	G	T	170	exonic	nonsynonymous_SNV	NMBR	.	NMBR:NM_002511:exon1:c.C88A:p.L30M	.	.	6q24.1	.	.	.	.	.	.	NA	PASS	-10	.	0.124	0.079	0.021	0.97	1	2.075	1.93	-0.09	0.235	-0.324	0.586	0.891	0.394	-0.982	0.026	0.549	1.13	1.045	7.429	.	99,70	0.436	99	70	0.436
T47D_Abe_Res2	chr12_67281939_A_G	chr12	67281939	A	G	20	exonic	nonsynonymous_SNV	CAND1	.	CAND1:NM_018448:exon2:c.A98G:p.E33G,CAND1:NM_001329674:exon3:c.A26G:p.E9G,CAND1:NM_001329675:exon3:c.A26G:p.E9G	.	.	12q14.3	.	.	.	.	.	.	NA	PASS	-10	.	0.011	1	0.999	0	1	3.32	3.09	-6.11	0.91	6.515	31	0.999	0.993	-0.876	0.108	0.732	5.88	1.199	15.953	Armadillo-like_helical\x3bArmadillo-type_fold	14,6	0.316	14	6	0.316
T47D_Abe_Res2	chr12_132148890_A_ACCTCGGTGAGTGCCGCCGCCTCACTCCTACCACACCCCTAATCC	chr12	132148890	A	ACCTCGGTGAGTGCCGCCGCCTCACTCCTACCACACCCCTAATCC	28	exonic	frameshift_insertion	NOC4L	.	NOC4L:NM_024078:exon9:c.896_897insCCTCGGTGAGTGCCGCCGCCTCACTCCTACCACACCCCTAATCC:p.G302Efs*23	.	.	12q24.33	0.0037	.	.	.	.	.	NA	PASS	-10	0.0002	.	.	.	.	.	.	.	.	.	.	.	.	.	.	.	.	.	.	.	.	22,6	0.222	22	6	0.222
T47D_Abe_Res2	chr14_20118008_G_T	chr14	20118008	G	T	23	exonic	nonsynonymous_SNV	OR4K17	.	OR4K17:NM_001004715:exon1:c.G602T:p.G201V	.	.	14q11.2	.	.	.	.	.	.	NA	PASS	-10	.	0	0.997	0.976	0.004	1	3.82	8.7	-8.77	0.477	4.96	25	0.996	0.859	-0.809	0.002	0.487	2.86	0.586	7.27	GPCR,_rhodopsin-like,_7TM	15,7	0.299	15	7	0.299
T47D_Abe_Res2	chr14_73543087_A_C	chr14	73543087	A	C	247	exonic	nonsynonymous_SNV	ACOT1	.	ACOT1:NM_001037161:exon3:c.A698C:p.K233T	.	.	14q24.3	.	.	.	.	.	.	NA	PASS	-10	.	0.008	1	0.999	0	1	2.36	1.01	-3.94	0.612	5.344	25.9	0.998	0.878	-0.67	0.237	0.744	2.89	0.196	10.057	Alpha/Beta_hydrolase_fold\x3bBAAT/Acyl-CoA_thioester_hydrolase_C-terminal	237,6	0.029	237	6	0.029
T47D_Abe_Res2	chr15_99808215_C_A	chr15	99808215	C	A	95	ncRNA_exonic	.	LOC400464	.	.	.	.	15q26.3	.	.	.	.	.	.	NA	PASS	-10	.	.	.	.	.	.	.	.	.	.	.	.	.	.	.	.	.	.	.	.	.	57,35	0.401	57	35	0.401
T47D_Abe_Res2	chr16_65004769_G_A	chr16	65004769	G	A	88	exonic	nonsynonymous_SNV	CDH11	.	CDH11:NM_001308392:exon3:c.C101T:p.S34F,CDH11:NM_001797:exon3:c.C101T:p.S34F	.	.	16q21	.	.	.	.	.	.	NA	PASS	-10	.	0.203	0.993	0.912	0.025	1	1.355	0.81	-0.96	0.736	4.393	24.1	0.943	0.988	-0.665	0.259	0.638	5.01	0.998	18.188	.	59,26	0.308	59	26	0.308
T47D_Abe_Res2	chr17_44750907_C_T	chr17	44750907	C	T	53	exonic	nonsynonymous_SNV	DBF4B	.	DBF4B:NM_145663:exon14:c.C1502T:p.P501L	ID\x3dCOSM1383710\x3bOCCURENCE\x3d1(large_intestine)	.	17q21.31	9.415e-06	.	.	.	.	.	NA	PASS	-10	.	0	0	0	0.06	1	0.345	0.43	-1.13	0.043	1.723	14.54	0.974	0.004	-1.09	0.077	0.651	-0.788	-2.949	0.432	.	38,15	0.3	38	15	0.3
T47D_Abe_Res2	chr17_76733014_G_A	chr17	76733014	G	A	122	exonic	nonsynonymous_SNV	METTL23	.	METTL23:NM_001080510:exon3:c.G121A:p.A41T,METTL23:NM_001206983:exon3:c.G121A:p.A41T,METTL23:NM_001206984:exon3:c.G121A:p.A41T,METTL23:NM_001302705:exon3:c.G109A:p.A37T,METTL23:NM_001302703:exon4:c.G121A:p.A41T	.	.	17q25.1	.	.	.	.	.	.	NA	PASS	-10	.	0.003	1	1	0	1	3.01	1.24	-3.52	0.889	6.957	33	0.999	0.99	-0.328	0.351	0.722	6.17	1.048	20.474	S-adenosyl-L-methionine-dependent_methyltransferase	112,6	0.044	112	6	0.044
T47D_Abe_Res2	chr20_41005952_C_A	chr20	41005952	C	A	229	ncRNA_exonic	.	LOC100128988	.	.	.	.	20q12	.	.	.	.	.	.	NA	PASS	-10	.	.	.	.	.	.	.	.	.	.	.	.	.	.	.	.	.	.	.	.	.	162,58	0.266	162	58	0.266
T47D_Abe_Res3	chr6_24583700_T_C	chr6	24583700	T	C	41	exonic	nonsynonymous_SNV	KIAA0319	.	KIAA0319:NM_001168376:exon4:c.A862G:p.K288E,KIAA0319:NM_001350404:exon4:c.A979G:p.K327E,KIAA0319:NM_001350406:exon4:c.A862G:p.K288E,KIAA0319:NM_001168375:exon5:c.A997G:p.K333E,KIAA0319:NM_001168377:exon5:c.A997G:p.K333E,KIAA0319:NM_001350403:exon5:c.A997G:p.K333E,KIAA0319:NM_001350407:exon5:c.A997G:p.K333E,KIAA0319:NM_001350408:exon5:c.A997G:p.K333E,KIAA0319:NM_014809:exon5:c.A997G:p.K333E,KIAA03…	ID\x3dCOSM1672264\x3bOCCURENCE\x3d1(breast)	.	6p22.3	.	.	.	.	.	.	NA	PASS	-10	.	0.024	0.001	0.007	0.026	1	2.255	3.04	-2.06	0.204	2.483	19.36	0.978	0.066	-0.991	0.011	0.649	-2.09	0.043	5.957	Fibronectin_type_III	18,22	0.533	18	22	0.533
T47D_Abe_Res3	chrX_48700557_T_A	chrX	48700557	T	A	63	exonic	nonsynonymous_SNV	SUV39H1	.	SUV39H1:NM_001282166:exon3:c.T665A:p.V222E,SUV39H1:NM_003173:exon3:c.T632A:p.V211E	.	.	Xp11.23	.	.	.	.	.	.	NA	PASS	-10	.	0.001	0.997	0.974	0	1	2.365	-1.13	-5.03	0.94	6.199	28.7	0.992	0.994	0.281	0.599	.	5.06	1.059	11.735	Pre-SET_domain\x3bPre-SET_zinc-binding_sub-group	42,20	0.347	42	20	0.347
T47D_Abe_Res3	chr1_44813387_G_GCCACT	chr1	44813387	G	GCCACT	66	exonic	frameshift_insertion	BTBD19	.	BTBD19:NM_001136537:exon7:c.629_630insCCACT:p.P211Hfs*12	.	.	1p34.1	0.0002	.	.	.	.	.	NA	PASS	-10	0.0002	.	.	.	.	.	.	.	.	.	.	.	.	.	.	.	.	.	.	.	.	57,9	0.188	57	9	0.188
T47D_Abe_Res3	chr1_44813388_G_GCACTCCAGCCTGAGATTGTGCCACTGCACT	chr1	44813388	G	GCACTCCAGCCTGAGATTGTGCCACTGCACT	66	exonic	nonframeshift_insertion	BTBD19	.	BTBD19:NM_001136537:exon7:c.630_631insCACTCCAGCCTGAGATTGTGCCACTGCACT:p.R210_P211insHSSLRLCHCT	.	.	1p34.1	.	.	.	.	.	.	NA	PASS	-10	.	.	.	.	.	.	.	.	.	.	.	.	.	.	.	.	.	.	.	.	.	57,9	0.188	57	9	0.188
T47D_Abe_Res3	chr1_155015470_C_G	chr1	155015470	C	G	115	exonic	stopgain	ZBTB7B	.	ZBTB7B:NM_001256455:exon2:c.C810G:p.Y270X,ZBTB7B:NM_001252406:exon4:c.C912G:p.Y304X	.	.	1q21.3	.	.	.	.	.	.	NA	PASS	-10	.	.	.	.	0.119	1	.	.	.	.	7.427	34	0.989	0.171	.	.	0.732	-2.45	-0.954	9.641	.	100,7	0.082	100	7	0.082
T47D_Abe_Res3	chr1_156295645_T_A	chr1	156295645	T	A	85	exonic	startloss	GLMP	.	GLMP:NM_001256604:exon1:c.A1T:p.M1?,GLMP:NM_001256605:exon1:c.A1T:p.M1?,GLMP:NM_001256608:exon1:c.A1T:p.M1?,GLMP:NM_144580:exon1:c.A1T:p.M1?	.	.	1q22	.	.	.	.	.	.	NA	PASS	-10	.	0	0.102	0.015	0.004	1	.	2.12	-0.65	0.909	3.574	23.2	0.759	0.787	-1.083	0.026	0.726	2.51	1.049	6.875	.	75,8	0.12	75	8	0.12
T47D_Abe_Res3	chr1_158329477_G_T	chr1	158329477	G	T	135	exonic	nonsynonymous_SNV	CD1B	.	CD1B:NM_001764:exon4:c.C779A:p.T260K	.	.	1q23.1	.	.	.	.	.	.	NA	PASS	-10	.	0	1	0.999	0	1	3.855	3.98	-5.71	0.742	4.134	23.8	0.972	0.165	-1.035	0.035	0.428	3.35	0.007	7.962	Immunoglobulin_C1-set\x3bImmunoglobulin-like_domain\x3bImmunoglobulin-like_fold	119,15	0.111	119	15	0.111
T47D_Abe_Res3	chr2_98217871_T_C	chr2	98217871	T	C	32	exonic	nonsynonymous_SNV	VWA3B	.	VWA3B:NM_001345864:exon8:c.T833C:p.V278A,VWA3B:NM_144992:exon14:c.T1862C:p.V621A	.	.	2q11.2	.	.	.	.	.	.	NA	PASS	-10	.	0.054	0.957	0.705	0.001	1	1.505	3.01	-2.72	0.371	1.522	13.43	0.967	0.449	-1.1	0.037	0.497	3.42	0.964	7.943	von_Willebrand_factor,_type_A	26,6	0.251	26	6	0.251
T47D_Abe_Res3	chr3_177442042_C_T	chr3	177442042	C	T	156	ncRNA_exonic	.	LINC00578	.	.	.	.	3q26.32	.	.	.	.	.	.	NA	PASS	-10	.	.	.	.	.	.	.	.	.	.	.	.	.	.	.	.	.	.	.	.	.	137,17	0.118	137	17	0.118
T47D_Abe_Res3	chr4_3414167_G_A	chr4	3414167	G	A	82	exonic	nonsynonymous_SNV	RGS12	.	RGS12:NM_198227:exon3:c.G172A:p.E58K,RGS12:NM_002926:exon5:c.G2116A:p.E706K,RGS12:NM_198229:exon5:c.G2116A:p.E706K	.	.	4p16.3	.	.	.	.	.	.	NA	PASS	-10	.	0.021	0.955	0.932	0	1	0.975	4.43	-2.65	0.437	5.172	25.5	0.999	0.995	-0.897	0.017	0.651	4.27	1.048	16.059	PDZ_domain\x3bRGS_domain\x3bRGS,_subdomain_1	76,6	0.092	76	6	0.092
T47D_Abe_Res3	chr4_52745312_G_A	chr4	52745312	G	A	65	exonic	nonsynonymous_SNV	ERVMER34-1	.	ERVMER34-1:NM_001242690:exon3:c.C209T:p.T70I,ERVMER34-1:NM_024534:exon4:c.C209T:p.T70I	.	.	4q12	.	.	.	.	.	.	NA	PASS	-10	.	.	0.997	0.979	.	1	0	.	.	0.175	3.074	22.4	0.99	0.028	.	.	0.732	1.22	0.502	5.892	.	54,10	0.2	54	10	0.2
T47D_Abe_Res3	chr4_177990548_C_A	chr4	177990548	C	A	40	ncRNA_exonic	.	LINC01098	.	.	.	.	4q34.3	.	.	.	.	.	.	NA	PASS	-10	.	.	.	.	.	.	.	.	.	.	.	.	.	.	.	.	.	.	.	.	.	33,7	0.185	33	7	0.185
T47D_Abe_Res3	chr5_160617942_T_G	chr5	160617942	T	G	49	exonic	nonsynonymous_SNV	ATP10B	.	ATP10B:NM_025153:exon16:c.A2448C:p.R816S	.	.	5q34	.	.	.	.	.	.	NA	PASS	-10	.	0.101	0.565	0.355	0.005	0.983	0.775	-0.25	-2.03	0.274	2.897	21.8	0.971	0.577	-0.946	0.175	0.554	2.99	-0.022	8.601	P-type_ATPase,_cytoplasmic_domain_N	37,11	0.231	37	11	0.231
T47D_Abe_Res3	chr6_29462174_C_A	chr6	29462174	C	A	81	exonic	nonsynonymous_SNV	OR2H1	.	OR2H1:NM_001318014:exon4:c.C405A:p.H135Q,OR2H1:NM_001318022:exon4:c.C405A:p.H135Q,OR2H1:NM_030883:exon4:c.C405A:p.H135Q	.	.	6p22.1	.	.	.	.	.	.	NA	PASS	-10	.	0.005	0.922	0.556	0.015	1	1.935	5.01	-6.13	0.125	4.152	23.8	0.948	0.152	-0.899	0.004	0.487	2.03	-0.045	6.049	GPCR,_rhodopsin-like,_7TM	62,15	0.16	62	15	0.16
T47D_Abe_Res3	chr6_44254277_C_G	chr6	44254277	C	G	94	ncRNA_exonic	.	MIR4647	.	.	.	.	6p21.1	.	.	.	.	.	.	NA	PASS	-10	.	.	.	.	.	.	.	.	.	.	.	.	.	.	.	.	.	.	.	.	.	83,11	0.125	83	11	0.125
T47D_Abe_Res3	chr6_142088571_G_T	chr6	142088571	G	T	122	exonic	nonsynonymous_SNV	NMBR	.	NMBR:NM_002511:exon1:c.C88A:p.L30M	.	.	6q24.1	.	.	.	.	.	.	NA	PASS	-10	.	0.124	0.079	0.021	0.97	1	2.075	1.93	-0.09	0.235	-0.324	0.586	0.891	0.394	-0.982	0.026	0.549	1.13	1.045	7.429	.	93,24	0.212	93	24	0.212
T47D_Abe_Res3	chr12_56254664_C_T	chr12	56254664	C	T	87	exonic	nonsynonymous_SNV	ANKRD52	.	ANKRD52:NM_173595:exon7:c.G607A:p.D203N	.	.	12q13.3	.	.	.	.	.	.	NA	PASS	-10	.	0.001	1	0.994	0	1	1.41	2.31	-4.5	0.269	6.969	33	0.999	0.991	-1.138	0.09	0.707	4.85	0.935	17.282	Ankyrin_repeat-containing_domain	80,7	0.104	80	7	0.104
T47D_Abe_Res3	chr12_122702193_TAAGGA_T	chr12	122702193	TAAGGA	T	367	exonic	frameshift_deletion	HCAR2	.	HCAR2:NM_177551:exon1:c.1086_1090del:p.P363Nfs*26	.	.	12q24.31	.	.	.	.	.	.	NA	PASS	-10	0.0003	.	.	.	.	.	.	.	.	.	.	.	.	.	.	.	.	.	.	.	.	337,10	0.04	337	10	0.04
T47D_Abe_Res3	chr15_71728715_G_C	chr15	71728715	G	C	71	exonic	nonsynonymous_SNV	THSD4	.	THSD4:NM_001286429:exon3:c.G444C:p.L148F,THSD4:NM_024817:exon8:c.G1524C:p.L508F	.	.	15q23	.	.	.	.	.	.	NA	PASS	-10	.	0.011	1	0.999	0.704	1	2.79	-0.12	-2.44	0.815	5.714	26.8	0.999	0.918	-0.331	0.428	0.706	3.94	1.048	6.495	ADAM-TS_Spacer_1	58,8	0.113	58	8	0.113
T47D_Abe_Res3	chr15_99808215_C_A	chr15	99808215	C	A	65	ncRNA_exonic	.	LOC400464	.	.	.	.	15q26.3	.	.	.	.	.	.	NA	PASS	-10	.	.	.	.	.	.	.	.	.	.	.	.	.	.	.	.	.	.	.	.	.	45,18	0.287	45	18	0.287
T47D_Abe_Res3	chr16_15515370_G_A	chr16	15515370	G	A	146	exonic	nonsynonymous_SNV	BMERB1	.	C16orf45:NM_001142469:exon2:c.G121A:p.A41T,C16orf45:NM_033201:exon2:c.G172A:p.A58T	ID\x3dCOSM3402097\x3bOCCURENCE\x3d1(central_nervous_system)	.	16p13.11	.	.	.	.	.	.	NA	PASS	-10	.	0.564	0.009	0.013	0.002	0.972	1.01	1.01	-0.66	0.33	2.641	20.5	0.995	0.87	-1.052	0.078	0.661	5.14	0.949	9.681	Domain_of_unknown_function_DUF3585	135,7	0.049	135	7	0.049
T47D_Abe_Res3	chr16_65004769_G_A	chr16	65004769	G	A	75	exonic	nonsynonymous_SNV	CDH11	.	CDH11:NM_001308392:exon3:c.C101T:p.S34F,CDH11:NM_001797:exon3:c.C101T:p.S34F	.	.	16q21	.	.	.	.	.	.	NA	PASS	-10	.	0.203	0.993	0.912	0.025	1	1.355	0.81	-0.96	0.736	4.393	24.1	0.943	0.988	-0.665	0.259	0.638	5.01	0.998	18.188	.	60,15	0.17	60	15	0.17
T47D_Abe_Res3	chr16_85805088_G_T	chr16	85805088	G	T	109	exonic	nonsynonymous_SNV	COX4I1	.	COX4I1:NM_001318786:exon3:c.G225T:p.M75I,COX4I1:NM_001318788:exon3:c.G225T:p.M75I,COX4I1:NM_001318794:exon3:c.G225T:p.M75I,COX4I1:NM_001318797:exon3:c.G111T:p.M37I,COX4I1:NM_001861:exon3:c.G225T:p.M75I	.	.	16q24.1	.	.	.	.	.	.	NA	PASS	-10	.	0.204	0	0.002	0.717	1	-0.61	0.63	-0.93	0.046	1.276	12.14	0.941	0.071	-1.026	0.057	0.707	0.07	0.031	9.809	.	96,12	0.123	96	12	0.123
T47D_Abe_Res3	chr17_44903993_G_A	chr17	44903993	G	A	212	exonic	nonsynonymous_SNV	FAM187A	.	FAM187A:NM_001258400:exon1:c.G164A:p.C55Y	.	.	17q21.31	.	.	.	.	.	.	NA	PASS	-10	.	0.002	0.999	0.993	0	1	.	0.08	-3.59	0.874	4.805	24.8	0.997	0.983	-0.143	0.441	0.516	5.94	1.048	20.359	Immunoglobulin_V-set_domain\x3bImmunoglobulin_subtype\x3bImmunoglobulin-like_fold	200,7	0.033	200	7	0.033
T47D_Abe_Res3	chr17_72123639_AG_A	chr17	72123639	AG	A	165	exonic	frameshift_deletion	SOX9	.	SOX9:NM_000346:exon3:c.783delG:p.G263Afs*16	.	.	17q24.3	.	.	.	.	.	.	NA	PASS	-10	.	.	.	.	.	.	.	.	.	.	.	.	.	.	.	.	.	.	.	.	.	138,24	0.147	138	24	0.147
T47D_Abe_Res3	chr17_78514887_C_G	chr17	78514887	C	G	129	exonic	nonsynonymous_SNV	DNAH17	.	DNAH17:NM_173628:exon26:c.G4000C:p.V1334L	.	.	17q25.3	.	.	.	.	.	.	NA	PASS	-10	.	.	.	.	.	0.998	-0.705	0.14	.	0.386	1.162	11.55	0.9	0.419	-1.03	0.057	0.487	2.27	-0.979	4.58	Dynein_heavy_chain,_domain-2	120,8	0.075	120	8	0.075
T47D_Abe_Res3	chr20_41005952_C_A	chr20	41005952	C	A	198	ncRNA_exonic	.	LOC100128988	.	.	.	.	20q12	.	.	.	.	.	.	NA	PASS	-10	.	.	.	.	.	.	.	.	.	.	.	.	.	.	.	.	.	.	.	.	.	168,25	0.144	168	25	0.144
T47D_Abe_Res3	chrX_108735278_G_T	chrX	108735278	G	T	107	exonic	nonsynonymous_SNV	IRS4	.	IRS4:NM_003604:exon1:c.C1067A:p.S356Y	.	.	Xq22.3	.	.	.	.	.	.	NA	PASS	-10	.	0.005	0.998	0.956	0.044	0.999	0.975	1.17	-2.94	0.555	5.452	26.1	0.976	0.983	-1.034	0.135	.	4.73	0.948	17.008	.	93,13	0.149	93	13	0.149
T47D_Abe_Res3	chrX_120304417_T_G	chrX	120304417	T	G	57	exonic	nonsynonymous_SNV	TMEM255A	.	TMEM255A:NM_001104544:exon2:c.A133C:p.T45P,TMEM255A:NM_001104545:exon2:c.A133C:p.T45P,TMEM255A:NM_017938:exon2:c.A133C:p.T45P	.	.	Xq24	.	.	.	.	.	.	NA	PASS	-10	.	0.006	0.999	0.968	0	0.992	2.365	0.65	-4.14	0.722	5.103	25.3	0.996	0.937	-0.408	0.295	.	5.28	0.964	13.402	.	49,6	0.134	49	6	0.134
T47D_Palbo_Res1	chr12_48066956_G_T	chr12	48066956	G	T	26	exonic	nonsynonymous_SNV	SENP1	.	SENP1:NM_001267594:exon10:c.C1005A:p.F335L,SENP1:NM_001267595:exon10:c.C1005A:p.F335L	.	.	12q13.11	.	.	.	.	.	.	NA	PASS	-10	.	0.023	0.928	0.608	0	1	0.805	2.45	-0.53	0.52	5.211	25.6	0.998	0.945	-1.091	0.034	0.706	2.83	0.132	5.902	.	14,12	0.527	14	12	0.527
T47D_Palbo_Res1	chr17_49991563_T_A	chr17	49991563	T	A	38	exonic	nonsynonymous_SNV	DLX3	.	DLX3:NM_005220:exon3:c.A818T:p.H273L	.	.	17q21.33	.	.	.	.	.	.	NA	PASS	-10	.	0.271	0.118	0.017	0	1	1.74	-2.8	-4.45	0.391	2.217	17.62	0.823	0.983	-0.293	0.559	0.549	3.79	0.981	8.705	.	4,34	0.867	4	34	0.867
T47D_Palbo_Res1	chr2_102479156_A_C	chr2	102479156	A	C	61	exonic	nonsynonymous_SNV	SLC9A4	.	SLC9A4:NM_001011552:exon2:c.A574C:p.N192H	.	.	2q12.1	.	.	.	.	.	.	NA	PASS	-10	.	0.117	0.022	0.033	0	0.863	1.635	2.38	-1.79	0.188	1.288	12.21	0.983	0.913	-1.063	0.037	0.497	4.34	1.088	7.796	Cation/H+_exchanger	53,8	0.109	53	8	0.109
T47D_Palbo_Res1	chr5_151566177_T_G	chr5	151566177	T	G	83	exonic	nonsynonymous_SNV	FAT2	.	FAT2:NM_001447:exon1:c.A2755C:p.N919H	.	.	5q33.1	.	.	.	.	.	.	NA	PASS	-10	.	0	1	0.999	0	1	4.465	-1.12	-4.59	0.568	4.661	24.5	0.997	0.965	0.909	0.789	0.487	5.67	1.061	15.924	Cadherin\x3bCadherin_conserved_site\x3bCadherin-like	75,7	0.085	75	7	0.085
T47D_Palbo_Res1	chr6_28302213_C_A	chr6	28302213	C	A	72	exonic	nonsynonymous_SNV	PGBD1	.	PGBD1:NM_001184743:exon7:c.C2359A:p.L787I,PGBD1:NM_032507:exon7:c.C2359A:p.L787I	.	.	6p22.1	.	.	.	.	.	.	NA	PASS	-10	.	0.046	0.245	0.077	0.09	1	0.695	4.97	-0.48	0.277	2.318	18.29	0.933	0.079	-0.937	0.001	0.615	-0.275	-0.294	6.518	.	54,15	0.205	54	15	0.205
T47D_Palbo_Res1	chr8_38993636_C_T	chr8	38993636	C	T	156	exonic	nonsynonymous_SNV	TM2D2	.	TM2D2:NM_001024380:exon3:c.G211A:p.V71M,TM2D2:NM_001024381:exon3:c.G211A:p.V71M,TM2D2:NM_031940:exon3:c.G211A:p.V71M,TM2D2:NM_078473:exon3:c.G340A:p.V114M	.	.	8p11.22	.	.	.	.	.	.	NA	PASS	-10	.	0.005	0.885	0.188	0	1	2.33	.	-2.88	0.667	6.876	33	0.999	0.972	-0.843	0.144	0.707	3.86	0.852	10.497	.	135,14	0.098	135	14	0.098
T47D_Palbo_Res1	chr9_121774326_C_T	chr9	121774326	C	T	75	exonic	stopgain	DAB2IP	.	DAB2IP:NM_138709:exon11:c.C2662T:p.Q888X,DAB2IP:NM_032552:exon13:c.C2950T:p.Q984X	.	.	9q33.2	.	.	.	.	.	.	NA	PASS	-10	.	.	.	.	0	1	.	.	.	.	14.684	47	0.998	0.994	.	.	0.707	5.3	0.935	17.96	Domain_of_unknown_function_DUF3498	65,8	0.14	65	8	0.14
T47D_Palbo_Res1	chr10_49077280_G_T	chr10	49077280	G	T	79	exonic	nonsynonymous_SNV	VSTM4	.	VSTM4:NM_001031746:exon4:c.C573A:p.S191R	.	.	10q11.23	.	.	.	.	.	.	NA	PASS	-10	.	0.03	0.998	0.991	0	0.999	1.7	2.78	-2.55	0.911	4.182	23.8	0.995	0.05	-1.135	0.053	0.616	-6.45	-0.01	16.414	.	66,13	0.186	66	13	0.186
T47D_Palbo_Res1	chr10_49941683_G_A	chr10	49941683	G	A	118	exonic	nonsynonymous_SNV	PARG	.	PARG:NM_003631:exon1:c.C43T:p.R15C	.	.	10q11.23	.	.	.	.	.	.	NA	PASS	-10	.	.	0.986	0.321	.	.	0.695	.	.	0.64	2.066	16.63	0.986	0.736	.	.	0.162	2.41	0.891	10.054	.	91,24	0.191	91	24	0.191
T47D_Palbo_Res1	chr11_63217709_C_T	chr11	63217709	C	T	49	exonic	stopgain	SLC22A25	.	SLC22A25:NM_199352:exon3:c.G533A:p.W178X	.	.	11q12.3	.	.	.	.	.	.	NA	PASS	-10	.	.	.	.	0.266	1	.	.	.	.	5.737	26.9	0.972	0.191	.	.	0.487	0.752	0.694	6.054	Major_facilitator_superfamily_domain	37,12	0.275	37	12	0.275
T47D_Palbo_Res1	chr11_84098923_C_A	chr11	84098923	C	A	28	exonic	nonsynonymous_SNV	DLG2	.	DLG2:NM_001142700:exon3:c.G281T:p.R94M,DLG2:NM_001206769:exon4:c.G551T:p.R184M,DLG2:NM_001300983:exon5:c.G434T:p.R145M,DLG2:NM_001351276:exon5:c.G491T:p.R164M,DLG2:NM_001364:exon5:c.G434T:p.R145M,DLG2:NM_001351275:exon8:c.G782T:p.R261M,DLG2:NM_001351274:exon9:c.G785T:p.R262M,DLG2:NM_001142699:exon10:c.G749T:p.R250M	.	.	11q14.1	.	.	.	.	.	.	NA	PASS	-10	.	0.003	1	0.997	0	1	2.13	1.56	-3.54	0.769	7	33	0.965	0.985	-0.833	0.204	0.554	5.39	0.935	19.515	Membrane-associated_guanylate_kinase_(MAGUK),_PEST_domain,_N-terminal\x3bPDZ_domain	20,7	0.25	20	7	0.25
T47D_Palbo_Res1	chr11_124030192_C_A	chr11	124030192	C	A	921	exonic	nonsynonymous_SNV	OR10G8	.	OR10G8:NM_001004464:exon1:c.C570A:p.D190E	.	.	11q24.2	.	.	.	.	.	.	NA	PASS	-10	.	0.011	0.208	0.246	0.009	0.979	2.43	8.5	-3.77	0.254	3.827	23.4	0.991	0.366	-1.054	0.001	0.487	2.11	0.828	7.438	GPCR,_rhodopsin-like,_7TM	868,35	0.036	868	35	0.036
T47D_Palbo_Res1	chr11_132657131_G_T	chr11	132657131	G	T	328	exonic	nonsynonymous_SNV	OPCML	.	OPCML:NM_001319103:exon2:c.C356A:p.T119K,OPCML:NM_001319104:exon2:c.C56A:p.T19K,OPCML:NM_001319106:exon2:c.C356A:p.T119K,OPCML:NM_002545:exon2:c.C356A:p.T119K,OPCML:NM_001012393:exon3:c.C335A:p.T112K,OPCML:NM_001319105:exon3:c.C233A:p.T78K	.	.	11q25	.	.	.	.	.	.	NA	PASS	-10	.	0.002	1	0.996	0	1	2.505	-0.22	-5.19	0.914	6.644	32	0.995	0.995	0.089	0.536	0.615	5.83	1.048	20.105	Immunoglobulin_I-set\x3bImmunoglobulin_subtype\x3bImmunoglobulin-like_domain\x3bImmunoglobulin-like_fold	306,15	0.057	306	15	0.057
T47D_Palbo_Res1	chr12_85980159_G_C	chr12	85980159	G	C	78	exonic	stopgain	MGAT4C	.	MGAT4C:NM_001351287:exon5:c.C567G:p.Y189X,MGAT4C:NM_001351288:exon5:c.C567G:p.Y189X,MGAT4C:NM_001351282:exon6:c.C681G:p.Y227X,MGAT4C:NM_001351283:exon6:c.C654G:p.Y218X,MGAT4C:NM_001351284:exon6:c.C654G:p.Y218X,MGAT4C:NM_001351289:exon6:c.C567G:p.Y189X,MGAT4C:NM_013244:exon7:c.C567G:p.Y189X,MGAT4C:NM_001351286:exon8:c.C567G:p.Y189X,MGAT4C:NM_001351291:exon8:c.C567G:p.Y189X,MGAT4C:NM_001351285:exon…	.	.	12q21.31	.	.	.	.	.	.	NA	PASS	-10	.	.	.	.	0	1	.	.	.	.	8.685	35	0.993	0.949	.	.	0.554	0.368	0.998	10.729	.	58,18	0.246	58	18	0.246
T47D_Palbo_Res1	chr14_65721921_G_A	chr14	65721921	G	A	126	exonic	nonsynonymous_SNV	FUT8	.	FUT8:NM_004480:exon7:c.G493A:p.V165M,FUT8:NM_178156:exon7:c.G982A:p.V328M,FUT8:NM_178155:exon8:c.G982A:p.V328M	.	.	14q23.3	.	.	.	.	.	.	NA	PASS	-10	.	0.066	0.999	0.949	0	1	2.24	-2.48	-2.03	0.925	5.078	25.3	0.999	0.989	0.665	0.801	0.732	5.68	1.048	17.288	Glycosyltransferase_family_23_(GT23)_domain	108,10	0.086	108	10	0.086
T47D_Palbo_Res1	chr14_95446018_C_T	chr14	95446018	C	T	83	exonic	nonsynonymous_SNV	SYNE3	.	SYNE3:NM_152592:exon8:c.G1523A:p.G508D	.	.	14q32.13	.	.	.	.	.	.	NA	PASS	-10	.	0.124	0.828	0.394	0.035	1	1.355	3.54	-1.52	0.27	0.989	10.6	0.988	0.053	-1.033	0.033	0.672	5.31	0.852	10.555	.	68,13	0.166	68	13	0.166
T47D_Palbo_Res1	chr14_101979808_C_T	chr14	101979808	C	T	83	exonic	nonsynonymous_SNV	DYNC1H1	.	DYNC1H1:NM_001376:exon4:c.C608T:p.P203L	.	.	14q32.31	.	.	.	.	.	.	NA	PASS	-10	.	0.001	1	1	0	1	3.25	1.01	-8.52	0.82	6.655	32	0.999	0.991	-0.152	0.353	0.722	4.89	0.807	18.943	.	69,13	0.156	69	13	0.156
T47D_Palbo_Res1	chr19_5215354_G_A	chr19	5215354	G	A	96	exonic	nonsynonymous_SNV	PTPRS	.	PTPRS:NM_130853:exon19:c.C2912T:p.P971L,PTPRS:NM_130855:exon20:c.C2924T:p.P975L,PTPRS:NM_130854:exon23:c.C4139T:p.P1380L,PTPRS:NM_002850:exon28:c.C4253T:p.P1418L	.	0.000199681	19p13.3	9.417e-06	.	.	.	.	.	NA	PASS	-10	.	0.003	1	0.994	0	1	1.975	1.53	-8.53	0.528	6.068	28.1	0.998	0.966	-0.76	0.165	0.706	2.97	0.824	14.401	Fibronectin_type_III\x3bImmunoglobulin-like_fold\x3bProtein-tyrosine_phosphatase,_receptor/non-receptor_type\x3bProtein-tyrosine_phosphatase-like	88,7	0.081	88	7	0.081
T47D_Palbo_Res1	chr19_12792405_A_G	chr19	12792405	A	G	26	exonic	nonsynonymous_SNV	JUNB	.	JUNB:NM_002229:exon1:c.A634G:p.T212A	.	.	19p13.13	1.823e-05	.	.	.	.	.	NA	PASS	-10	.	0.077	0	0.001	0	1	1.525	1.55	-1.58	0.09	1.858	15.33	0.986	0.84	-1.083	0.058	0.652	4.02	1.076	7.551	Jun-like_transcription_factor	19,6	0.28	19	6	0.28
T47D_Palbo_Res1	chr19_40900050_C_T	chr19	40900050	C	T	44	ncRNA_exonic	.	CYP2G1P	.	.	.	.	19q13.2	.	.	.	.	.	.	NA	PASS	-10	.	.	.	.	.	.	.	.	.	.	.	.	.	.	.	.	.	.	.	.	.	36,7	0.161	36	7	0.161
T47D_Palbo_Res1	chr22_32529000_G_T	chr22	32529000	G	T	75	exonic	nonsynonymous_SNV	SYN3	.	SYN3:NM_003490:exon10:c.C1104A:p.D368E,SYN3:NM_133633:exon10:c.C1104A:p.D368E,SYN3:NM_001135774:exon11:c.C1101A:p.D367E	.	.	22q12.3	.	.	.	.	.	.	NA	PASS	-10	.	0.011	0.986	0.803	0	1	2.945	0.9	-2.57	0.875	5.4	26	0.993	0.818	-0.375	0.279	0.758	5.15	1.048	18.425	ATP-grasp_fold,_subdomain_2\x3bSynapsin,_ATP-binding_domain	54,20	0.288	54	20	0.288
T47D_Palbo_Res2	chr1_156295645_T_A	chr1	156295645	T	A	70	exonic	startloss	GLMP	.	GLMP:NM_001256604:exon1:c.A1T:p.M1?,GLMP:NM_001256605:exon1:c.A1T:p.M1?,GLMP:NM_001256608:exon1:c.A1T:p.M1?,GLMP:NM_144580:exon1:c.A1T:p.M1?	.	.	1q22	.	.	.	.	.	.	NA	PASS	-10	.	0	0.102	0.015	0.004	1	.	2.12	-0.65	0.909	3.574	23.2	0.759	0.787	-1.083	0.026	0.726	2.51	1.049	6.875	.	54,9	0.13	54	9	0.13
T47D_Palbo_Res2	chr2_98217871_T_C	chr2	98217871	T	C	27	exonic	nonsynonymous_SNV	VWA3B	.	VWA3B:NM_001345864:exon8:c.T833C:p.V278A,VWA3B:NM_144992:exon14:c.T1862C:p.V621A	.	.	2q11.2	.	.	.	.	.	.	NA	PASS	-10	.	0.054	0.957	0.705	0.001	1	1.505	3.01	-2.72	0.371	1.522	13.43	0.967	0.449	-1.1	0.037	0.497	3.42	0.964	7.943	von_Willebrand_factor,_type_A	19,8	0.318	19	8	0.318
T47D_Palbo_Res2	chr2_151416567_A_G	chr2	151416567	A	G	23	exonic	nonsynonymous_SNV	RIF1	.	RIF1:NM_001177665:exon4:c.A287G:p.N96S,RIF1:NM_001177663:exon5:c.A287G:p.N96S,RIF1:NM_001177664:exon5:c.A287G:p.N96S,RIF1:NM_018151:exon5:c.A287G:p.N96S	.	.	2q23.3	9.462e-06	.	.	.	.	.	NA	PASS	-10	.	0.554	0.288	0.079	0.018	0.993	1.39	-0.1	-1.28	0.045	0.613	8.245	0.272	0.96	-0.991	0.155	0.707	4.49	1.199	10.283	Armadillo-like_helical\x3bArmadillo-type_fold\x3bTelomere-associated_protein_Rif1,_N-terminal	17,6	0.227	17	6	0.227
T47D_Palbo_Res2	chr3_10081151_C_G	chr3	10081151	C	G	78	exonic	nonsynonymous_SNV	FANCD2	.	FANCD2:NM_001018115:exon31:c.C3028G:p.Q1010E,FANCD2:NM_001319984:exon31:c.C3028G:p.Q1010E,FANCD2:NM_033084:exon31:c.C3028G:p.Q1010E	.	.	3p25.3	.	.	.	.	.	.	NA	PASS	-10	.	0.053	0.666	0.234	0.103	1	1.87	0.79	-1.04	0.153	0.19	4.578	0.935	0.152	-1.045	0.095	0.732	1.82	0.935	6.36	.	68,8	0.123	68	8	0.123
T47D_Palbo_Res2	chr3_177442042_C_T	chr3	177442042	C	T	178	ncRNA_exonic	.	LINC00578	.	.	.	.	3q26.32	.	.	.	.	.	.	NA	PASS	-10	.	.	.	.	.	.	.	.	.	.	.	.	.	.	.	.	.	.	.	.	.	167,7	0.042	167	7	0.042
T47D_Palbo_Res2	chr5_160617942_T_G	chr5	160617942	T	G	46	exonic	nonsynonymous_SNV	ATP10B	.	ATP10B:NM_025153:exon16:c.A2448C:p.R816S	.	.	5q34	.	.	.	.	.	.	NA	PASS	-10	.	0.101	0.565	0.355	0.005	0.983	0.775	-0.25	-2.03	0.274	2.897	21.8	0.971	0.577	-0.946	0.175	0.554	2.99	-0.022	8.601	P-type_ATPase,_cytoplasmic_domain_N	39,7	0.154	39	7	0.154
T47D_Palbo_Res2	chr6_29462174_C_A	chr6	29462174	C	A	58	exonic	nonsynonymous_SNV	OR2H1	.	OR2H1:NM_001318014:exon4:c.C405A:p.H135Q,OR2H1:NM_001318022:exon4:c.C405A:p.H135Q,OR2H1:NM_030883:exon4:c.C405A:p.H135Q	.	.	6p22.1	.	.	.	.	.	.	NA	PASS	-10	.	0.005	0.922	0.556	0.015	1	1.935	5.01	-6.13	0.125	4.152	23.8	0.948	0.152	-0.899	0.004	0.487	2.03	-0.045	6.049	GPCR,_rhodopsin-like,_7TM	43,13	0.26	43	13	0.26
T47D_Palbo_Res2	chr6_32006030_T_A	chr6	32006030	T	A	207	ncRNA_exonic	.	CYP21A1P	.	.	.	.	6p21.33	.	.	.	.	.	.	NA	PASS	-10	.	.	.	.	.	.	.	.	.	.	.	.	.	.	.	.	.	.	.	.	.	196,10	0.051	196	10	0.051
T47D_Palbo_Res2	chr6_142088571_G_T	chr6	142088571	G	T	140	exonic	nonsynonymous_SNV	NMBR	.	NMBR:NM_002511:exon1:c.C88A:p.L30M	.	.	6q24.1	.	.	.	.	.	.	NA	PASS	-10	.	0.124	0.079	0.021	0.97	1	2.075	1.93	-0.09	0.235	-0.324	0.586	0.891	0.394	-0.982	0.026	0.549	1.13	1.045	7.429	.	98,39	0.294	98	39	0.294
T47D_Palbo_Res2	chr8_10612469_C_G	chr8	10612469	C	G	37	exonic	nonsynonymous_SNV	RP1L1	.	RP1L1:NM_178857:exon4:c.G1629C:p.E543D	.	.	8p23.1	.	.	.	.	.	.	NA	PASS	-10	.	0.026	0.948	0.487	0.245	1	0.975	3.41	-1.01	0.141	2.499	19.46	0.991	0.037	-1.004	0.017	0.581	2.51	-0.389	6.133	.	29,8	0.194	29	8	0.194
T47D_Palbo_Res2	chr8_68087773_G_A	chr8	68087773	G	A	105	exonic	nonsynonymous_SNV	PREX2	.	PREX2:NM_024870:exon19:c.G2077A:p.G693R,PREX2:NM_025170:exon19:c.G2077A:p.G693R	.	.	8q13.2	.	.	.	.	.	.	NA	PASS	-10	.	0	1	1	0	1	2.335	1.47	-4.64	0.936	7.152	34	0.999	0.996	-0.686	0.216	0.737	5.45	1.048	19.286	PDZ_domain	93,10	0.092	93	10	0.092
T47D_Palbo_Res2	chr9_130104451_A_G	chr9	130104451	A	G	226	exonic	nonsynonymous_SNV	GPR107	.	GPR107:NM_001136557:exon13:c.A1163G:p.E388G,GPR107:NM_001136558:exon13:c.A1163G:p.E388G,GPR107:NM_001287346:exon13:c.A596G:p.E199G,GPR107:NM_020960:exon13:c.A1163G:p.E388G	.	.	9q34.11	.	.	.	.	.	.	NA	PASS	-10	.	0.004	1	1	0	1	1.01	1.74	-6.23	0.941	5.032	25.2	0.999	0.949	-1.082	0.102	0.707	5.2	1.14	14.187	.	220,6	0.038	220	6	0.038
T47D_Palbo_Res2	chr11_132657228_G_T	chr11	132657228	G	T	412	exonic	nonsynonymous_SNV	OPCML	.	OPCML:NM_001319103:exon2:c.C259A:p.R87S,OPCML:NM_001319106:exon2:c.C259A:p.R87S,OPCML:NM_002545:exon2:c.C259A:p.R87S,OPCML:NM_001012393:exon3:c.C238A:p.R80S,OPCML:NM_001319105:exon3:c.C136A:p.R46S	ID\x3dCOSM1241519,COSM1241520\x3bOCCURENCE\x3d1(oesophagus)	.	11q25	.	.	.	.	.	.	NA	PASS	-10	.	0	1	1	0	1	3.81	1.09	-5.45	0.827	6.916	33	0.998	0.965	0.04	0.419	0.615	5.92	1.048	20.321	Immunoglobulin_I-set\x3bImmunoglobulin_subtype\x3bImmunoglobulin-like_domain\x3bImmunoglobulin-like_fold	399,6	0.015	399	6	0.015
T47D_Palbo_Res2	chr12_122702193_TAAGGA_T	chr12	122702193	TAAGGA	T	376	exonic	frameshift_deletion	HCAR2	.	HCAR2:NM_177551:exon1:c.1086_1090del:p.P363Nfs*26	.	.	12q24.31	.	.	.	.	.	.	NA	PASS	-10	0.0003	.	.	.	.	.	.	.	.	.	.	.	.	.	.	.	.	.	.	.	.	352,7	0.026	352	7	0.026
T47D_Palbo_Res2	chr15_99808215_C_A	chr15	99808215	C	A	61	ncRNA_exonic	.	LOC400464	.	.	.	.	15q26.3	.	.	.	.	.	.	NA	PASS	-10	.	.	.	.	.	.	.	.	.	.	.	.	.	.	.	.	.	.	.	.	.	44,14	0.256	44	14	0.256
T47D_Palbo_Res2	chr16_65004769_G_A	chr16	65004769	G	A	75	exonic	nonsynonymous_SNV	CDH11	.	CDH11:NM_001308392:exon3:c.C101T:p.S34F,CDH11:NM_001797:exon3:c.C101T:p.S34F	.	.	16q21	.	.	.	.	.	.	NA	PASS	-10	.	0.203	0.993	0.912	0.025	1	1.355	0.81	-0.96	0.736	4.393	24.1	0.943	0.988	-0.665	0.259	0.638	5.01	0.998	18.188	.	60,14	0.219	60	14	0.219
T47D_Palbo_Res2	chr17_17226297_T_G	chr17	17226297	T	G	48	exonic	nonsynonymous_SNV	FLCN	.	FLCN:NM_144606:exon5:c.A275C:p.H92P,FLCN:NM_144997:exon5:c.A275C:p.H92P	.	.	17p11.2	.	.	.	.	.	.	NA	PASS	-10	.	0.048	1	0.997	0	1	1.525	-1.68	-3.43	0.835	2.447	19.13	0.986	0.991	0.688	0.835	0.707	5.64	1.058	15.023	.	42,6	0.119	42	6	0.119
T47D_Palbo_Res2	chr17_72123639_AG_A	chr17	72123639	AG	A	134	exonic	frameshift_deletion	SOX9	.	SOX9:NM_000346:exon3:c.783delG:p.G263Afs*16	.	.	17q24.3	.	.	.	.	.	.	NA	PASS	-10	.	.	.	.	.	.	.	.	.	.	.	.	.	.	.	.	.	.	.	.	.	102,30	0.225	102	30	0.225
T47D_Palbo_Res2	chr20_41005952_C_A	chr20	41005952	C	A	188	ncRNA_exonic	.	LOC100128988	.	.	.	.	20q12	.	.	.	.	.	.	NA	PASS	-10	.	.	.	.	.	.	.	.	.	.	.	.	.	.	.	.	.	.	.	.	.	167,17	0.098	167	17	0.098
T47D_Palbo_Res2	chr20_57652298_G_A	chr20	57652298	G	A	45	exonic	nonsynonymous_SNV	PMEPA1	.	PMEPA1:NM_001255976:exon4:c.C535T:p.P179S,PMEPA1:NM_020182:exon4:c.C619T:p.P207S,PMEPA1:NM_199169:exon4:c.C514T:p.P172S,PMEPA1:NM_199170:exon4:c.C469T:p.P157S,PMEPA1:NM_199171:exon4:c.C469T:p.P157S	.	.	20q13.31	.	.	.	.	.	.	NA	PASS	-10	.	0.002	0.999	0.932	0	1	2.365	0.52	-4.8	0.707	5.158	25.4	0.999	0.986	-0.269	0.338	0.696	4.56	1.048	16.221	.	37,8	0.187	37	8	0.187
T47D_Palbo_Res2	chrX_30218806_G_A	chrX	30218806	G	A	44	exonic	nonsynonymous_SNV	MAGEB2	.	MAGEB2:NM_002364:exon2:c.G226A:p.V76I	.	.	Xp21.2	0	.	.	.	.	.	NA	PASS	-10	.	0.11	0.877	0.472	0.046	1	1.825	3.61	-0.66	0.035	-0.136	1.477	0.991	0.068	-0.998	0.021	.	1.35	0.091	4.514	MAGE_homology_domain\x3bMelanoma_associated_antigen,_MAGE,_N-terminal	35,7	0.166	35	7	0.166
T47D_Palbo_Res3	chr5_141413211_G_C	chr5	141413211	G	C	80	exonic	nonsynonymous_SNV	PCDHGA10	.	PCDHGA10:NM_018913:exon1:c.G36C:p.K12N,PCDHGA10:NM_032090:exon1:c.G36C:p.K12N	.	.	5q31.3	.	.	.	.	.	.	NA	PASS	-10	.	0.264	0.013	0.001	.	1	0	0.74	-0.65	0.091	-1.258	0.005	0.597	0.04	-1.053	0.042	0.652	-8.95	-0.463	3.799	.	35,42	0.531	35	42	0.531
T47D_Palbo_Res3	chr9_76711049_G_T	chr9	76711049	G	T	120	exonic	nonsynonymous_SNV	PRUNE2	.	PRUNE2:NM_001308047:exon8:c.C1225A:p.L409I,PRUNE2:NM_001308048:exon8:c.C1225A:p.L409I,PRUNE2:NM_015225:exon8:c.C1225A:p.L409I	.	.	9q21.2	.	.	.	.	.	.	NA	PASS	-10	.	0.001	1	0.96	0	0.989	0.975	0.64	-0.82	0.336	4.508	24.3	0.996	0.952	-0.711	0.217	0.554	5.64	1.048	10.467	.	71,47	0.377	71	47	0.377
T47D_Palbo_Res3	chr15_28237107_G_C	chr15	28237107	G	C	40	exonic	nonsynonymous_SNV	HERC2	.	HERC2:NM_004667:exon26:c.C3859G:p.Q1287E	.	.	15q13.1	0.0002	.	.	.	.	.	NA	PASS	-10	0.0001	1	0.713	0.68	0	1	0.37	1.27	-0.26	0.509	0.701	8.831	0.432	0.992	-1.108	0.083	0.732	4.55	1.048	17.691	.	0,40	0.97	0	40	0.97
T47D_Palbo_Res3	chr15_33601470_G_A	chr15	33601470	G	A	47	exonic	nonsynonymous_SNV	RYR3	.	RYR3:NM_001036:exon17:c.G1840A:p.A614T,RYR3:NM_001243996:exon17:c.G1840A:p.A614T	.	.	15q14	0.0004	.	.	.	.	.	NA	PASS	-10	0.0001	0.058	0.003	0.004	0	0.999	0.805	-0.35	-0.81	0.209	3.399	23	0.997	0.908	-0.053	0.636	0.487	4.57	0.953	13.007	Armadillo-type_fold\x3bB30.2/SPRY_domain\x3bRIH_(RyR_and_IP3R_Homology)_domain	0,47	0.975	0	47	0.975
T47D_Palbo_Res3	chr15_42228756_G_C	chr15	42228756	G	C	46	exonic	nonsynonymous_SNV	TMEM87A	.	TMEM87A:NM_001286487:exon12:c.C1013G:p.S338C,TMEM87A:NM_015497:exon13:c.C1196G:p.S399C	.	.	15q15.1	2.859e-05	.	.	.	.	.	NA	PASS	-10	.	0.001	1	0.999	0	1	2.505	.	-4.85	0.882	6.342	29.3	0.993	0.992	0.079	0.526	0.732	5.4	1.048	19.369	.	0,45	0.97	0	45	0.97
T47D_Palbo_Res3	chr15_43700804_C_T	chr15	43700804	C	T	42	ncRNA_exonic	.	STRCP1	.	.	.	.	15q15.3	.	.	.	.	.	.	NA	PASS	-10	0.0001	.	.	.	.	.	.	.	.	.	.	.	.	.	.	.	.	.	.	.	.	0,38	0.973	0	38	0.973
T47D_Palbo_Res3	chr15_44537196_T_TGGCGGCGGC	chr15	44537196	T	TGGCGGCGGC	13	exonic	nonframeshift_insertion	EIF3J	.	EIF3J:NM_001284335:exon1:c.2_3insGGCGGCGGC:p.A8_G9insAAA,EIF3J:NM_001284336:exon1:c.2_3insGGCGGCGGC:p.A8_G9insAAA,EIF3J:NM_003758:exon1:c.2_3insGGCGGCGGC:p.A8_G9insAAA	ID\x3dCOSM1373099\x3bOCCURENCE\x3d1(breast),1(large_intestine)	0.00179712	15q21.1	0.0059	.	.	.	.	.	NA	PASS	-10	0.0065	.	.	.	.	.	.	.	.	.	.	.	.	.	.	.	.	.	.	.	.	0,11	0.912	0	11	0.912
T47D_Palbo_Res3	chr15_57706884_G_C	chr15	57706884	G	C	42	exonic	nonsynonymous_SNV	POLR2M	.	POLR2M:NM_001018102:exon1:c.G42C:p.E14D,POLR2M:NM_015532:exon1:c.G42C:p.E14D	.	0.000599042	15q21.3	0.0015	.	.	.	.	.	NA	PASS	-10	0.0018	0	0.998	0.941	.	1	.	.	-0.33	0.281	3.122	22.6	0.973	0.454	-0.969	0.175	0.442	3.84	0.933	10.74	.	0,42	0.973	0	42	0.973
T47D_Palbo_Res3	chr15_66553064_C_G	chr15	66553064	C	G	80	exonic	nonsynonymous_SNV	LCTL	.	LCTL:NM_001278562:exon8:c.G598C:p.D200H,LCTL:NM_207338:exon9:c.G1117C:p.D373H	ID\x3dCOSM1678547\x3bOCCURENCE\x3d1(breast)	.	15q22.31	.	.	.	.	.	.	NA	PASS	-10	.	0.008	1	1	0	1	2.02	1.33	-4.87	0.923	5.291	25.7	0.994	0.983	-0.416	0.344	0.615	5.51	0.935	18.762	Glycoside_hydrolase_superfamily\x3bGlycoside_hydrolase,_catalytic_domain	0,78	0.982	0	78	0.982
T47D_Palbo_Res3	chr15_82282320_G_A	chr15	82282320	G	A	70	exonic	nonsynonymous_SNV	SAXO2	.	SAXO2:NM_001348704:exon2:c.G230A:p.R77H,SAXO2:NM_001008226:exon3:c.G455A:p.R152H,SAXO2:NM_001348699:exon4:c.G635A:p.R212H,SAXO2:NM_001348700:exon4:c.G494A:p.R165H,SAXO2:NM_001348702:exon4:c.G410A:p.R137H,SAXO2:NM_001348703:exon4:c.G410A:p.R137H,SAXO2:NM_001348701:exon5:c.G494A:p.R165H	.	0.000399361	15q25.2	0.0004	.	.	.	.	.	NA	PASS	-10	0.0002	0.004	1	0.996	0.003	0.92	2.38	1.81	-3.95	0.648	5.963	27.7	0.999	0.751	-0.828	0.141	0.422	1.8	0.896	8.861	.	0,70	0.984	0	70	0.984
T47D_Palbo_Res3	chr15_88881638_C_T	chr15	88881638	C	T	30	exonic	nonsynonymous_SNV	HAPLN3	.	HAPLN3:NM_178232:exon3:c.G212A:p.R71H,HAPLN3:NM_001307952:exon4:c.G398A:p.R133H	.	.	15q26.1	7.558e-05	.	.	.	.	.	NA	PASS	-10	.	0.799	0.024	0.031	0.328	0.998	-0.09	-0.06	-0.9	0.231	1.256	12.04	0.52	0.058	-1.022	0.081	0.707	-1.16	-0.823	5.899	Immunoglobulin_V-set_domain\x3bImmunoglobulin_subtype\x3bImmunoglobulin-like_domain\x3bImmunoglobulin-like_fold	0,30	0.963	0	30	0.963
T47D_Palbo_Res3	chr15_94298381_G_A	chr15	94298381	G	A	63	exonic	nonsynonymous_SNV	MCTP2	.	MCTP2:NM_001159643:exon1:c.G116A:p.R39Q,MCTP2:NM_018349:exon1:c.G116A:p.R39Q	.	0.000599042	15q26.2	0.0014	.	.	.	.	.	NA	PASS	-10	0.001	0.166	0.024	0.008	0.221	1	0.46	-0.26	-0.38	0.161	1.258	12.05	0.976	0.159	-0.882	0.178	0.638	3.19	0.953	9.344	.	2,60	0.962	2	60	0.962
T47D_Palbo_Res3	chr17_81914641_G_A	chr17	81914641	G	A	64	exonic	nonsynonymous_SNV	SIRT7	.	SIRT7:NM_016538:exon6:c.C542T:p.T181M	.	0.000199681	17q25.3	0.0007	.	.	.	.	.	NA	PASS	-10	0.0001	0.106	0.24	0.105	0.367	1	1.83	2.26	-1.13	0.137	0.876	9.925	0.95	0.421	-1.023	0.038	0.707	2.08	0.94	4.777	DHS-like_NAD/FAD-binding_domain\x3bSirtuin_family,_catalytic_core_domain	0,62	0.979	0	62	0.979
T47D_Palbo_Res3	chrX_48700557_T_A	chrX	48700557	T	A	76	exonic	nonsynonymous_SNV	SUV39H1	.	SUV39H1:NM_001282166:exon3:c.T665A:p.V222E,SUV39H1:NM_003173:exon3:c.T632A:p.V211E	.	.	Xp11.23	.	.	.	.	.	.	NA	PASS	-10	.	0.001	0.997	0.974	0	1	2.365	-1.13	-5.03	0.94	6.199	28.7	0.992	0.994	0.281	0.599	.	5.06	1.059	11.735	Pre-SET_domain\x3bPre-SET_zinc-binding_sub-group	37,38	0.5	37	38	0.5
T47D_Palbo_Res3	chr3_30839040_A_G	chr3	30839040	A	G	69	exonic	nonsynonymous_SNV	GADL1	.	GADL1:NM_207359:exon9:c.T860C:p.I287T	.	.	3p23	.	.	.	.	.	.	NA	PASS	-10	.	0	0.997	0.973	0	1	3.65	0.48	-4.54	0.961	6.372	29.5	0.999	0.993	0.19	0.468	0.487	5.78	1.199	16.397	Pyridoxal_phosphate-dependent_transferase\x3bPyridoxal_phosphate-dependent_transferase,_major_region,_subdomain_1	53,13	0.204	53	13	0.204
T47D_Palbo_Res3	chr5_16453040_T_C	chr5	16453040	T	C	73	exonic	nonsynonymous_SNV	ZNF622	.	ZNF622:NM_033414:exon5:c.A1279G:p.R427G	.	.	5p15.1	.	.	.	.	.	.	NA	PASS	-10	.	0.004	0.979	0.747	0.002	0.997	2.845	.	-5.31	0.742	5.375	25.9	0.997	0.962	-0.126	0.371	0.719	-1.74	0.088	17.392	.	64,7	0.121	64	7	0.121
T47D_Palbo_Res3	chr5_33751549_C_A	chr5	33751549	C	A	55	splicing	.	ADAMTS12	NM_001324512:exon3:c.490-1G>T\x3bNM_030955:exon3:c.490-1G>T\x3bNM_001324511:exon3:c.490-1G>T	.	.	.	5p13.3	.	.	.	.	.	.	NA	PASS	-10	.	.	.	.	.	1	.	.	.	.	5.536	26.3	0.995	0.924	.	.	0.263	5.8	0.935	15.569	.	38,17	0.311	38	17	0.311
T47D_Palbo_Res3	chr5_140883121_G_C	chr5	140883121	G	C	48	exonic	nonsynonymous_SNV	PCDHA13	.	PCDHA13:NM_018904:exon1:c.G853C:p.V285L,PCDHA13:NM_031865:exon1:c.G853C:p.V285L	.	.	5q31.3	.	.	.	.	.	.	NA	PASS	-10	.	0.141	0.029	0.155	.	1	1.2	0.72	-1.83	0.047	0.157	4.219	0.873	0.239	-0.956	0.094	0.666	-0.61	1.048	2.147	Cadherin\x3bCadherin-like	28,18	0.359	28	18	0.359
T47D_Palbo_Res3	chr6_31994682_C_T	chr6	31994682	C	T	370	exonic	nonsynonymous_SNV	C4A;C4B;C4B_2	.	C4B:NM_001002029:exon21:c.C2777T:p.A926V,C4B_2:NM_001242823:exon21:c.C2777T:p.A926V,C4A:NM_001252204:exon21:c.C2777T:p.A926V,C4A:NM_007293:exon21:c.C2777T:p.A926V	.	.	6p21.33	0	.	.	.	.	.	NA	PASS	-10	.	0.057	0.152	0.046	0	1	2.19	1.24	-2.71	0.056	1.212	11.81	0.987	0.02	-1.028	0.037	0.554	1.06	0.638	5.201	.	354,6	0.02	354	6	0.02
T47D_Palbo_Res3	chr7_41978748_G_A	chr7	41978748	G	A	102	exonic	nonsynonymous_SNV	GLI3	.	GLI3:NM_000168:exon11:c.C1498T:p.H500Y	.	.	7p14.1	.	.	.	.	.	.	NA	PASS	-10	.	0	0.997	0.997	0	1	4.05	-3.03	-5.46	0.923	6.186	28.6	0.998	0.992	1.079	0.927	0.706	5.51	1.048	19.454	Zinc_finger_C2H2-type/integrase_DNA-binding_domain\x3bZinc_finger,_C2H2\x3bZinc_finger,_C2H2-like	84,18	0.172	84	18	0.172
T47D_Palbo_Res3	chr7_64266612_G_A	chr7	64266612	G	A	24	exonic	nonsynonymous_SNV	ZNF679	.	ZNF679:NM_153363:exon5:c.G979A:p.E327K	.	.	7q11.21	.	.	.	.	.	.	NA	PASS	-10	.	0.095	0.025	0.028	.	1	0.85	3.21	-3.27	0.147	0.966	10.46	0.892	0.003	-0.92	0.014	0.487	0.81	0.337	3.244	Zinc_finger_C2H2-type/integrase_DNA-binding_domain\x3bZinc_finger,_C2H2\x3bZinc_finger,_C2H2-like	14,9	0.368	14	9	0.368
T47D_Palbo_Res3	chr8_38993636_C_T	chr8	38993636	C	T	149	exonic	nonsynonymous_SNV	TM2D2	.	TM2D2:NM_001024380:exon3:c.G211A:p.V71M,TM2D2:NM_001024381:exon3:c.G211A:p.V71M,TM2D2:NM_031940:exon3:c.G211A:p.V71M,TM2D2:NM_078473:exon3:c.G340A:p.V114M	.	.	8p11.22	.	.	.	.	.	.	NA	PASS	-10	.	0.005	0.885	0.188	0	1	2.33	.	-2.88	0.667	6.876	33	0.999	0.972	-0.843	0.144	0.707	3.86	0.852	10.497	.	114,31	0.216	114	31	0.216
T47D_Palbo_Res3	chr8_50536681_A_G	chr8	50536681	A	G	89	exonic	nonsynonymous_SNV	SNTG1	.	SNTG1:NM_001287814:exon10:c.A553G:p.T185A,SNTG1:NM_001321773:exon10:c.A553G:p.T185A,SNTG1:NM_001321777:exon10:c.A553G:p.T185A,SNTG1:NM_001321776:exon11:c.A553G:p.T185A,SNTG1:NM_001321778:exon11:c.A553G:p.T185A,SNTG1:NM_018967:exon11:c.A553G:p.T185A,SNTG1:NM_001287813:exon12:c.A553G:p.T185A,SNTG1:NM_001321775:exon12:c.A553G:p.T185A	.	.	8q11.21	.	.	.	.	.	.	NA	PASS	-10	.	0.117	0.088	0.021	0	1	0.235	0.59	-1.09	0.532	1.079	11.1	0.946	0.954	-1.053	0.083	0.595	4.81	0.945	13.196	Pleckstrin_homology_domain	69,17	0.176	69	17	0.176
T47D_Palbo_Res3	chr11_124030192_C_A	chr11	124030192	C	A	802	exonic	nonsynonymous_SNV	OR10G8	.	OR10G8:NM_001004464:exon1:c.C570A:p.D190E	.	.	11q24.2	.	.	.	.	.	.	NA	PASS	-10	.	0.011	0.208	0.246	0.009	0.979	2.43	8.5	-3.77	0.254	3.827	23.4	0.991	0.366	-1.054	0.001	0.487	2.11	0.828	7.438	GPCR,_rhodopsin-like,_7TM	660129	0.172	660	129	0.172
T47D_Palbo_Res3	chr12_121822891_G_A	chr12	121822891	G	A	41	exonic	nonsynonymous_SNV	SETD1B	.	SETD1B:NM_015048:exon12:c.G4183A:p.E1395K	.	.	12q24.31	.	.	.	.	.	.	NA	PASS	-10	.	0.003	0.996	0.565	0	1	1.845	0.9	-2.51	0.455	3.226	22.8	0.994	0.942	-0.882	0.152	0.707	4.91	0.949	18.469	.	30,10	0.242	30	10	0.242
T47D_Palbo_Res3	chr14_65721921_G_A	chr14	65721921	G	A	144	exonic	nonsynonymous_SNV	FUT8	.	FUT8:NM_004480:exon7:c.G493A:p.V165M,FUT8:NM_178156:exon7:c.G982A:p.V328M,FUT8:NM_178155:exon8:c.G982A:p.V328M	.	.	14q23.3	.	.	.	.	.	.	NA	PASS	-10	.	0.066	0.999	0.949	0	1	2.24	-2.48	-2.03	0.925	5.078	25.3	0.999	0.989	0.665	0.801	0.732	5.68	1.048	17.288	Glycosyltransferase_family_23_(GT23)_domain	103,36	0.267	103	36	0.267
T47D_Palbo_Res3	chr15_40370259_G_A	chr15	40370259	G	A	60	exonic	nonsynonymous_SNV	DISP2	.	DISP2:NM_033510:exon8:c.G4147A:p.D1383N	.	.	15q15.1	.	.	.	.	.	.	NA	PASS	-10	.	0.073	0.069	0.063	0	0.995	0.345	2.16	-1.46	0.027	3.099	22.5	0.998	0.974	-1.072	0.034	0.554	4.01	1.048	13.959	.	31,29	0.489	31	29	0.489
T47D_Palbo_Res3	chr16_4512987_C_G	chr16	4512987	C	G	23	exonic	nonsynonymous_SNV	CDIP1	.	CDIP1:NM_001199054:exon5:c.G319C:p.G107R,CDIP1:NM_013399:exon5:c.G319C:p.G107R	.	.	16p13.3	.	.	.	.	.	.	NA	PASS	-10	.	0.334	0.839	0.424	0.001	1	0.55	-2.31	-0.05	0.569	3.8	23.4	0.999	0.907	-0.477	0.386	0.672	5	0.935	6.879	.	14,8	0.336	14	8	0.336
T47D_Palbo_Res3	chr17_2441545_A_C	chr17	2441545	A	C	48	exonic	nonsynonymous_SNV	METTL16	.	METTL16:NM_024086:exon7:c.T743G:p.M248R	.	.	17p13.3	.	.	.	.	.	.	NA	PASS	-10	.	0.002	1	0.995	0	1	3.13	0.25	-5.72	0.968	6.292	29.1	0.987	0.983	0.114	0.489	0.706	5.74	1.194	12.438	.	16,31	0.672	16	31	0.672
T47D_Palbo_Res3	chr19_14746232_C_A	chr19	14746232	C	A	13	exonic	nonsynonymous_SNV	ADGRE2	.	ADGRE2:NM_001271052:exon16:c.G2009T:p.R670M,ADGRE2:NM_013447:exon18:c.G2183T:p.R728M	.	.	19p13.12	.	.	.	.	.	.	NA	PASS	-10	.	0.001	1	0.997	.	1	3.995	1.08	-5.3	0.641	5.647	26.6	0.95	0.831	0.129	0.4	0.615	4.74	0.769	15.216	GPCR,_family_2-like	6,6	0.462	6	6	0.462
T47D_Palbo_Res3	chr19_35352078_C_T	chr19	35352078	C	T	24	exonic	nonsynonymous_SNV	FFAR1	.	FFAR1:NM_005303:exon1:c.C527T:p.P176L	.	.	19q13.12	9.633e-06	.	.	.	.	.	NA	PASS	-10	.	0.225	0.761	0.239	0.08	0.999	0.695	-0.57	0.33	0.202	5.086	25.3	0.998	0.205	-0.78	0.186	0.66	4.34	0.834	12.207	GPCR,_rhodopsin-like,_7TM	12,10	0.47	12	10	0.47
T47D_Palbo_Res3	chr20_59001645_C_A	chr20	59001645	C	A	91	splicing	.	CTSZ	NM_001336:exon3:c.308-1G>T	.	.	.	20q13.32	.	.	.	.	.	.	NA	PASS	-10	.	.	.	.	.	1	.	.	.	.	5.524	26.3	0.995	0.966	.	.	0.257	4.91	0.888	18.135	.	71,19	0.217	71	19	0.217
[truncated: 7 more columns]

## Sheet: Table S3
Table S3: Whole Exome Sequencing CNA
chr	start	end	gene	BT474_Abe_Res1	BT474_Abe_Res2	BT474_Abe_Res3	BT474_DMSO_1	BT474_DMSO_2	BT474_DMSO_max	BT474_Palbo_Res1	BT474_Palbo_Res2	BT474_Palbo_Res3	MCF7_Abe_Res1	MCF7_Abe_Res2	MCF7_Abe_Res3	MCF7_DMSO_1	MCF7_DMSO_2	MCF7_DMSO_max	MCF7_Palbo_Res1	MCF7_Palbo_Res2	MCF7_Palbo_Res3	T47D_Abe_Res1	T47D_Abe_Res2	T47D_Abe_Res3	T47D_DMSO_1	T47D_DMSO_2	T47D_DMSO_max	T47D_Palbo_Res1	T47D_Palbo_Res2	T47D_Palbo_Res3	CGC
chr1	11980	14817	DDX11L1	-0.466791	-0.49963	-0.522959	-0.958362	-1.11636	-1.11636	-0.436827	-1.41617	-0.611664	-0.675363	-0.494892	-0.462115	-0.781862	-0.727805	-0.781862	-0.803357	-0.850441	-0.906676	-0.441841	-0.428817	-0.487834	-0.506154	-0.38849	-0.506154	-0.465089	-0.878589	-0.521219	no
chr1	14520	30427	WASH7P	-0.466791	-0.49963	-0.522959	-0.958362	-1.11636	-1.11636	-0.436827	-1.41617	-0.611664	-0.675363	-0.494892	-0.462115	-0.781862	-0.727805	-0.781862	-0.803357	-0.850441	-0.906676	-0.441841	-0.428817	-0.487834	-0.506154	-0.38849	-0.506154	-0.465089	-0.878589	-0.521219	no
chr1	30213	35306	MIR1302-2	-0.466791	-0.49963	-0.522959	-0.958362	-1.11636	-1.11636	-0.436827	-1.41617	-0.611664	-0.675363	-0.494892	-0.462115	-0.781862	-0.727805	-0.781862	-0.803357	-0.850441	-0.906676	-0.441841	-0.428817	-0.487834	-0.506154	-0.38849	-0.506154	-0.465089	-0.878589	-0.521219	no
chr1	35020	64909	FAM138A	-0.466791	-0.49963	-0.522959	-0.958362	-1.11636	-1.11636	-0.436827	-1.41617	-0.611664	-0.675363	-0.494892	-0.462115	-0.781862	-0.727805	-0.781862	-0.803357	-0.850441	-0.906676	-0.441841	-0.428817	-0.487834	-0.506154	-0.38849	-0.506154	-0.465089	-0.878589	-0.521219	no
chr1	68928	120217	OR4F5	-0.466791	-0.49963	-0.522959	-0.958362	-1.11636	-1.11636	-0.436827	-1.41617	-0.611664	-0.675363	-0.494892	-0.462115	-0.781862	-0.727805	-0.781862	-0.803357	-0.850441	-0.906676	-0.441841	-0.428817	-0.487834	-0.506154	-0.38849	-0.506154	-0.465089	-0.878589	-0.521219	no
chr1	135167	176847	LOC729737	-0.466791	-0.49963	-0.522959	-0.958362	-1.11636	-1.11636	-0.436827	-1.41617	-0.611664	-0.675363	-0.494892	-0.462115	-0.781862	-0.727805	-0.781862	-0.803357	-0.850441	-0.906676	-0.441841	-0.428817	-0.487834	-0.506154	-0.38849	-0.506154	-0.465089	-0.878589	-0.521219	no
chr1	182499	185375	LOC102725121	-0.466791	-0.49963	-0.522959	-0.958362	-1.11636	-1.11636	-0.436827	-1.41617	-0.611664	-0.675363	-0.494892	-0.462115	-0.781862	-0.727805	-0.781862	-0.803357	-0.850441	-0.906676	-0.441841	-0.428817	-0.487834	-0.506154	-0.38849	-0.506154	-0.465089	-0.878589	-0.521219	no
chr1	187699	188233	MIR6859-1	-0.466791	-0.49963	-0.522959	-0.958362	-1.11636	-1.11636	-0.436827	-1.41617	-0.611664	-0.675363	-0.494892	-0.462115	-0.781862	-0.727805	-0.781862	-0.803357	-0.850441	-0.906676	-0.441841	-0.428817	-0.487834	-0.506154	-0.38849	-0.506154	-0.465089	-0.878589	-0.521219	no
chr1	205536	258849	FAM138D	-0.466791	-0.49963	-0.522959	-0.958362	-1.11636	-1.11636	-0.436827	-1.41617	-0.611664	-0.675363	-0.494892	-0.462115	-0.781862	-0.727805	-0.781862	-0.803357	-0.850441	-0.906676	-0.441841	-0.428817	-0.487834	-0.506154	-0.38849	-0.506154	-0.465089	-0.878589	-0.521219	no
chr1	450599	711207	OR4F3	-0.466791	-0.49963	-0.522959	-0.958362	-1.11636	-1.11636	-0.436827	-1.41617	-0.611664	-0.675363	-0.494892	-0.462115	-0.781862	-0.727805	-0.781862	-0.803357	-0.850441	-0.906676	-0.441841	-0.428817	-0.487834	-0.506154	-0.38849	-0.506154	-0.465089	-0.68888	-0.521219	no
chr1	491150	498256	LOC100132062	-0.466791	-0.49963	-0.522959	-0.958362	-1.11636	-1.11636	-0.436827	-1.41617	-0.611664	-0.675363	-0.494892	-0.462115	-0.781862	-0.727805	-0.781862	-0.803357	-0.850441	-0.906676	-0.441841	-0.428817	-0.487834	-0.506154	-0.38849	-0.506154	-0.465089	-3.43206	-0.521219	no
chr1	726153	733200	LOC100133331	-0.466791	-0.49963	-0.522959	-0.958362	-1.11636	-1.11636	-0.436827	-1.41617	-0.611664	-0.675363	-3.31775	-0.462115	-0.781862	-2.95431	-2.95431	-0.803357	-0.850441	-0.906676	-0.441841	-0.428817	-0.487834	-0.506154	-0.38849	-0.506154	-0.465089	-0.499176	-0.521219	no
chr1	817430	826781	FAM87B	-0.466791	-0.49963	-0.522959	-0.400071	-0.528111	-0.528111	-0.436827	-0.482991	-0.611664	-0.675363	-0.692386	-0.462115	-0.781862	-0.645207	-0.781862	-0.803357	-0.850441	-0.906676	-0.441841	-0.428817	-0.487834	-0.506154	-0.38849	-0.506154	-0.465089	-0.499176	-0.521219	no
chr1	826530	841356	LINC00115	-0.466791	-0.49963	-0.522959	-0.400071	-0.528111	-0.528111	-0.436827	-0.482991	-0.611664	-0.675363	-0.692386	-0.462115	-0.781862	-0.645207	-0.781862	-0.803357	-0.850441	-0.906676	-0.441841	-0.428817	-0.487834	-0.506154	-0.38849	-0.506154	-0.465089	-0.499176	-0.521219	no
chr1	841856	867792	LINC01128	-0.466791	-0.49963	-0.522959	-0.400071	-0.528111	-0.528111	-0.436827	-0.482991	-0.611664	-0.675363	-0.692386	-0.462115	-0.781862	-0.645207	-0.781862	-0.803357	-0.850441	-0.906676	-0.441841	-0.428817	-0.487834	-0.506154	-0.38849	-0.506154	-0.465089	-0.499176	-0.521219	no
chr1	868292	925286	FAM41C	-0.466791	-0.49963	-0.522959	-0.400071	-0.528111	-0.528111	-0.436827	-0.482991	-0.611664	-0.675363	-0.692386	-0.462115	-0.781862	-0.645207	-0.781862	-0.803357	-0.850441	-0.906676	-0.441841	-0.428817	-0.487834	-0.506154	-0.38849	-0.506154	-0.465089	-0.499176	-0.521219	no
chr1	925786	944977	SAMD11	-0.466791	-0.49963	-0.522959	-0.400071	-0.528111	-0.528111	-0.436827	-0.482991	-0.611664	-0.675363	-0.692386	-0.462115	-0.781862	-0.645207	-0.781862	-0.803357	-0.850441	-0.906676	-0.441841	-0.428817	-0.487834	-0.506154	-0.38849	-0.506154	-0.465089	-0.499176	-0.521219	no
chr1	944678	961733	NOC2L	-0.466791	-0.49963	-0.522959	-0.400071	-0.528111	-0.528111	-0.436827	-0.482991	-0.611664	-0.675363	-0.692386	-0.462115	-0.781862	-0.645207	-0.781862	-0.803357	-0.850441	-0.906676	-0.441841	-0.428817	-0.487834	-0.506154	-0.38849	-0.506154	-0.465089	-0.499176	-0.521219	no
chr1	961461	970422	KLHL17	-0.466791	-0.49963	-0.522959	-0.400071	-0.528111	-0.528111	-0.436827	-0.482991	-0.611664	-0.675363	-0.692386	-0.462115	-0.781862	-0.645207	-0.781862	-0.803357	-0.850441	-0.906676	-0.441841	-0.428817	-0.487834	-0.506154	-0.38849	-0.506154	-0.465089	-0.499176	-0.521219	no
chr1	970150	976774	PLEKHN1	-0.466791	-0.49963	-0.522959	-0.400071	-0.528111	-0.528111	-0.436827	-0.482991	-0.611664	-0.675363	-0.692386	-0.462115	-0.781862	-0.645207	-0.781862	-0.803357	-0.850441	-0.906676	-0.441841	-0.428817	-0.487834	-0.506154	-0.38849	-0.506154	-0.465089	-0.499176	-0.521219	no
chr1	976541	982371	PERM1	-0.466791	-0.49963	-0.522959	-0.400071	-0.528111	-0.528111	-0.436827	-0.482991	-0.611664	-0.675363	-0.692386	-0.462115	-0.781862	-0.645207	-0.781862	-0.803357	-0.850441	-0.906676	-0.441841	-0.428817	-0.487834	-0.506154	-0.38849	-0.506154	-0.465089	-0.499176	-0.521219	no
chr1	998870	1012913	HES4	-0.466791	-0.49963	-0.522959	-0.400071	-0.528111	-0.528111	-0.436827	-0.482991	-0.611664	-0.675363	-0.692386	-0.462115	-0.781862	-0.645207	-0.781862	-0.803357	-0.850441	-0.906676	-0.441841	-0.428817	-0.487834	-0.506154	-0.38849	-0.506154	-0.465089	-0.499176	-0.521219	no
chr1	1013413	1022336	ISG15	-0.466791	-0.49963	-0.522959	-0.400071	-0.528111	-0.528111	-0.436827	-0.482991	-0.611664	-0.675363	-0.692386	-0.462115	-0.781862	-0.645207	-0.781862	-0.803357	-0.850441	-0.906676	-0.441841	-0.428817	-0.487834	-0.506154	-0.38849	-0.506154	-0.465089	-0.499176	-0.521219	no
chr1	1022106	1071127	AGRN	-0.466791	-0.49963	-0.522959	-0.400071	-0.528111	-0.528111	-0.436827	-0.482991	-0.611664	-0.675363	-0.692386	-0.462115	-0.781862	-0.645207	-0.781862	-0.803357	-0.850441	-0.906676	-0.441841	-0.428817	-0.487834	-0.506154	-0.38849	-0.506154	-0.465089	-0.499176	-0.521219	no
chr1	1071627	1082791	RNF223	-0.466791	-0.49963	-0.522959	-0.400071	-0.528111	-0.528111	-0.436827	-0.482991	-0.611664	-0.675363	-0.692386	-0.462115	-0.781862	-0.645207	-0.781862	-0.803357	-0.850441	-0.906676	-0.441841	-0.428817	-0.487834	-0.506154	-0.38849	-0.506154	-0.465089	-0.499176	-0.521219	no
chr1	1082476	1142119	C1orf159	-0.466791	-0.49963	-0.522959	-0.400071	-0.528111	-0.528111	-0.436827	-0.482991	-0.611664	-0.675363	-0.692386	-0.462115	-0.781862	-0.645207	-0.781862	-0.803357	-0.850441	-0.906676	-0.441841	-0.428817	-0.487834	-0.506154	-0.38849	-0.506154	-0.465089	-0.499176	-0.521219	no
chr1	1142619	1166447	LINC01342	-0.466791	-0.49963	-0.522959	-0.400071	-0.528111	-0.528111	-0.436827	-0.482991	-0.611664	-0.675363	-0.692386	-0.462115	-0.781862	-0.645207	-0.781862	-0.803357	-0.850441	-0.906676	-0.441841	-0.428817	-0.487834	-0.506154	-0.38849	-0.506154	-0.465089	-0.499176	-0.521219	no
chr1	1168862	1175623	MIR429	-0.466791	-0.49963	-0.522959	-0.400071	-0.528111	-0.528111	-0.436827	-0.482991	-0.611664	-0.675363	-0.692386	-0.462115	-0.781862	-0.645207	-0.781862	-0.803357	-0.850441	-0.906676	-0.441841	-0.428817	-0.487834	-0.506154	-0.38849	-0.506154	-0.465089	-0.499176	-0.521219	no
chr1	1175351	1203676	TTLL10	-0.466791	-0.49963	-0.522959	-0.400071	-0.528111	-0.528111	-0.436827	-0.482991	-0.611664	-0.675363	-0.692386	-0.462115	-0.781862	-0.645207	-0.781862	-0.803357	-0.850441	-0.906676	-0.441841	-0.428817	-0.487834	-0.506154	-0.38849	-0.506154	-0.465089	-0.499176	-0.521219	no
chr1	1203411	1211717	TNFRSF18	-0.466791	-0.49963	-0.522959	-0.400071	-0.528111	-0.528111	-0.436827	-0.482991	-0.611664	-0.675363	-0.692386	-0.462115	-0.781862	-0.645207	-0.781862	-0.803357	-0.850441	-0.906676	-0.441841	-0.428817	-0.487834	-0.506154	-0.38849	-0.506154	-0.465089	-0.499176	-0.521219	no
chr1	1211433	1217897	TNFRSF4	-0.466791	-0.49963	-0.522959	-0.400071	-0.528111	-0.528111	-0.436827	-0.482991	-0.611664	-0.675363	-0.692386	-0.462115	-0.781862	-0.645207	-0.781862	-0.803357	-0.850441	-0.906676	-0.441841	-0.428817	-0.487834	-0.506154	-0.38849	-0.506154	-0.465089	-0.499176	-0.521219	no
chr1	1217653	1242725	SDF4	-0.466791	-0.49963	-0.522959	-0.400071	-0.528111	-0.528111	-0.436827	-0.482991	-0.611664	-0.675363	-0.692386	-0.462115	-0.781862	-0.645207	-0.781862	-0.803357	-0.850441	-0.906676	-0.441841	-0.428817	-0.487834	-0.506154	-0.38849	-0.506154	-0.465089	-0.499176	-0.521219	no
chr1	1242454	1255373	C1QTNF12	-0.466791	-0.49963	-0.522959	-0.400071	-0.528111	-0.528111	-0.436827	-0.482991	-0.611664	-0.675363	-0.692386	-0.462115	-0.781862	-0.645207	-0.781862	-0.803357	-0.850441	-0.906676	-0.441841	-0.428817	-0.487834	-0.506154	-0.38849	-0.506154	-0.465089	-0.499176	-0.521219	no
chr1	1255121	1280103	UBE2J2	-0.466791	-0.49963	-0.522959	-0.400071	-0.528111	-0.528111	-0.436827	-0.482991	-0.611664	-0.675363	-0.692386	-0.462115	-0.781862	-0.645207	-0.781862	-0.803357	-0.850441	-0.906676	-0.441841	-0.428817	-0.487834	-0.506154	-0.38849	-0.506154	-0.465089	-0.499176	-0.521219	no
chr1	1280603	1295100	SCNN1D	-0.466791	-0.49963	-0.522959	-0.400071	-0.528111	-0.528111	-0.436827	-0.482991	-0.611664	-0.675363	-0.692386	-0.462115	-0.781862	-0.645207	-0.781862	-0.803357	-0.850441	-0.906676	-0.441841	-0.428817	-0.487834	-0.506154	-0.38849	-0.506154	-0.465089	-0.499176	-0.521219	no
chr1	1294826	1309528	ACAP3	-0.466791	-0.49963	-0.522959	-0.400071	-0.528111	-0.528111	-0.436827	-0.482991	-0.611664	-0.675363	-0.692386	-0.462115	-0.781862	-0.645207	-0.781862	-0.803357	-0.850441	-0.906676	-0.441841	-0.428817	-0.487834	-0.506154	-0.38849	-0.506154	-0.465089	-0.499176	-0.521219	no
chr1	1309272	1312010	PUSL1	-0.466791	-0.49963	-0.522959	-0.400071	-0.528111	-0.528111	-0.436827	-0.482991	-0.611664	-0.675363	-0.692386	-0.462115	-0.781862	-0.645207	-0.781862	-0.803357	-0.850441	-0.906676	-0.441841	-0.428817	-0.487834	-0.506154	-0.38849	-0.506154	-0.465089	-0.499176	-0.521219	no
chr1	1311759	1327005	INTS11	-0.466791	-0.49963	-0.522959	-0.400071	-0.528111	-0.528111	-0.436827	-0.482991	-0.611664	-0.675363	-0.692386	-0.462115	-0.781862	-0.645207	-0.781862	-0.803357	-0.850441	-0.906676	-0.441841	-0.428817	-0.487834	-0.506154	-0.38849	-0.506154	-0.465089	-0.499176	-0.521219	no
chr1	1326726	1331494	CPTP	-0.466791	-0.49963	-0.522959	-0.400071	-0.528111	-0.528111	-0.436827	-0.482991	-0.611664	-0.675363	-0.692386	-0.462115	-0.781862	-0.645207	-0.781862	-0.803357	-0.850441	-0.906676	-0.441841	-0.428817	-0.487834	-0.506154	-0.38849	-0.506154	-0.465089	-0.499176	-0.521219	no
chr1	1331230	1336284	TAS1R3	-0.466791	-0.49963	-0.522959	-0.400071	-0.528111	-0.528111	-0.436827	-0.482991	-0.611664	-0.675363	-0.692386	-0.462115	-0.781862	-0.645207	-0.781862	-0.803357	-0.850441	-0.906676	-0.441841	-0.428817	-0.487834	-0.506154	-0.38849	-0.506154	-0.465089	-0.499176	-0.521219	no
chr1	1336000	1353300	DVL1	-0.466791	-0.49963	-0.522959	-0.400071	-0.528111	-0.528111	-0.436827	-0.482991	-0.611664	-0.675363	-0.692386	-0.462115	-0.781862	-0.645207	-0.781862	-0.803357	-0.850441	-0.906676	-0.441841	-0.428817	-0.487834	-0.506154	-0.38849	-0.506154	-0.465089	-0.499176	-0.521219	no
chr1	1353041	1373237	MXRA8	-0.466791	-0.49963	-0.522959	-0.400071	-0.528111	-0.528111	-0.436827	-0.482991	-0.611664	-0.675363	-0.692386	-0.462115	-0.781862	-0.645207	-0.781862	-0.803357	-0.850441	-0.906676	-0.441841	-0.428817	-0.487834	-0.506154	-0.38849	-0.506154	-0.465089	-0.499176	-0.521219	no
chr1	1373737	1386642	AURKAIP1	-0.466791	-0.49963	-0.522959	-0.400071	-0.528111	-0.528111	-0.436827	-0.482991	-0.611664	-0.675363	-0.692386	-0.462115	-0.781862	-0.645207	-0.781862	-0.803357	-0.850441	-0.906676	-0.441841	-0.428817	-0.487834	-0.506154	-0.38849	-0.506154	-0.465089	-0.499176	-0.521219	no
chr1	1387142	1400334	CCNL2	-0.466791	-0.49963	-0.522959	-0.400071	-0.528111	-0.528111	-0.436827	-0.482991	-0.611664	-0.675363	-0.692386	-0.462115	-0.781862	-0.645207	-0.781862	-0.803357	-0.850441	-0.906676	-0.441841	-0.428817	-0.487834	-0.506154	-0.38849	-0.506154	-0.465089	-0.499176	-0.521219	no
chr1	1400082	1402387	LOC148413	-0.466791	-0.49963	-0.522959	-0.400071	-0.528111	-0.528111	-0.436827	-0.482991	-0.611664	-0.675363	-0.692386	-0.462115	-0.781862	-0.645207	-0.781862	-0.803357	-0.850441	-0.906676	-0.441841	-0.428817	-0.487834	-0.506154	-0.38849	-0.506154	-0.465089	-0.499176	-0.521219	no
chr1	1402169	1418476	MRPL20	-0.466791	-0.49963	-0.522959	-0.400071	-0.528111	-0.528111	-0.436827	-0.482991	-0.611664	-0.675363	-0.692386	-0.462115	-0.781862	-0.645207	-0.781862	-0.803357	-0.850441	-0.906676	-0.441841	-0.428817	-0.487834	-0.506154	-0.38849	-0.506154	-0.465089	-0.499176	-0.521219	no
chr1	1418976	1426212	ANKRD65	-0.466791	-0.49963	-0.522959	-0.400071	-0.528111	-0.528111	-0.436827	-0.482991	-0.611664	-0.675363	-0.692386	-0.462115	-0.781862	-0.645207	-0.781862	-0.803357	-0.850441	-0.906676	-0.441841	-0.428817	-0.487834	-0.506154	-0.38849	-0.506154	-0.465089	-0.499176	-0.521219	no
chr1	1425944	1437092	TMEM88B	-0.466791	-0.49963	-0.522959	-0.400071	-0.528111	-0.528111	-0.436827	-0.482991	-0.611664	-0.675363	-0.692386	-0.462115	-0.781862	-0.645207	-0.781862	-0.803357	-0.850441	-0.906676	-0.441841	-0.428817	-0.487834	-0.506154	-0.38849	-0.506154	-0.465089	-0.499176	-0.521219	no
chr1	1436804	1449968	VWA1	-0.466791	-0.49963	-0.522959	-0.400071	-0.528111	-0.528111	-0.436827	-0.482991	-0.611664	-0.675363	-0.692386	-0.462115	-0.781862	-0.645207	-0.781862	-0.803357	-0.850441	-0.906676	-0.441841	-0.428817	-0.487834	-0.506154	-0.38849	-0.506154	-0.465089	-0.499176	-0.521219	no
chr1	1450468	1472459	ATAD3C	-0.466791	-0.49963	-0.522959	-0.400071	-0.528111	-0.528111	-0.436827	-0.482991	-0.611664	-0.675363	-0.692386	-0.462115	-0.781862	-0.645207	-0.781862	-0.803357	-0.850441	-0.906676	-0.441841	-0.428817	-0.487834	-0.506154	-0.38849	-0.506154	-0.465089	-0.499176	-0.521219	no
chr1	1472216	1508619	ATAD3B	-0.466791	-0.49963	-0.522959	-0.400071	-0.528111	-0.528111	-0.436827	-0.482991	-0.611664	-0.675363	-0.692386	-0.462115	-0.781862	-0.645207	-0.781862	-0.803357	-0.850441	-0.906676	-0.441841	-0.428817	-0.487834	-0.506154	-0.38849	-0.506154	-0.465089	-0.499176	-0.521219	no
chr1	1512600	1535530	ATAD3A	-0.466791	-0.49963	-0.522959	-0.400071	-0.528111	-0.528111	-0.436827	-0.482991	-0.611664	-0.675363	-0.692386	-0.462115	-0.781862	-0.645207	-0.781862	-0.803357	-0.850441	-0.906676	-0.441841	-0.428817	-0.487834	-0.506154	-0.38849	-0.506154	-0.465089	-0.499176	-0.521219	no
chr1	1535201	1542026	TMEM240	-0.466791	-0.49963	-0.522959	-0.400071	-0.528111	-0.528111	-0.436827	-0.482991	-0.611664	-0.675363	-0.692386	-0.462115	-0.781862	-0.645207	-0.781862	-0.803357	-0.850441	-0.906676	-0.441841	-0.428817	-0.487834	-0.506154	-0.38849	-0.506154	-0.465089	-0.499176	-0.521219	no
chr1	1541760	1575180	SSU72	-0.466791	-0.49963	-0.522959	-0.400071	-0.528111	-0.528111	-0.436827	-0.482991	-0.611664	-0.675363	-0.692386	-0.462115	-0.781862	-0.645207	-0.781862	-0.803357	-0.850441	-0.906676	-0.441841	-0.428817	-0.487834	-0.506154	-0.38849	-0.506154	-0.465089	-0.499176	-0.521219	no
chr1	1616614	1632856	MIB2	-0.466791	-0.49963	-0.522959	-0.400071	-0.528111	-0.528111	-0.436827	-0.482991	-0.611664	-0.675363	-0.692386	-0.462115	-0.781862	-0.645207	-0.781862	-0.803357	-0.850441	-0.906676	-0.441841	-0.428817	-0.487834	-0.506154	-0.38849	-0.506154	-0.465089	-0.499176	-0.521219	no
chr1	1632597	1635899	MMP23B	-0.466791	-0.49963	-0.522959	-0.400071	-0.528111	-0.528111	-0.436827	-0.482991	-0.611664	-0.675363	-0.692386	-0.462115	-0.781862	-0.645207	-0.781862	-0.803357	-0.850441	-0.906676	-0.441841	-0.428817	-0.487834	-0.506154	-0.38849	-0.506154	-0.465089	-0.499176	-0.521219	no
chr1	1635630	1660291	CDK11B	-0.466791	-0.49963	-0.522959	-0.400071	-0.528111	-0.528111	-0.436827	-0.482991	-0.611664	-0.675363	-0.692386	-0.462115	-0.781862	-0.645207	-0.781862	-0.803357	-0.850441	-0.906676	-0.441841	-0.428817	-0.487834	-0.506154	-0.38849	-0.506154	-0.465089	-0.499176	-0.521219	no
chr1	1664192	1699256	SLC35E2B	-0.466791	-0.49963	-0.522959	-0.400071	-0.528111	-0.528111	-0.436827	-0.482991	-0.611664	-0.675363	-0.692386	-0.462115	-0.781862	-0.645207	-0.781862	-0.803357	-0.850441	-0.906676	-0.441841	-0.428817	-0.487834	-0.506154	-0.38849	-0.506154	-0.465089	-0.499176	-0.521219	no
chr1	1699756	1703042	MMP23A	-0.466791	-0.49963	-0.522959	-0.400071	-0.528111	-0.528111	-0.436827	-0.482991	-0.611664	-0.675363	-0.692386	-0.462115	-0.781862	-0.645207	-0.781862	-0.803357	-0.850441	-0.906676	-0.441841	-0.428817	-0.487834	-0.506154	-0.38849	-0.506154	-0.465089	-0.499176	-0.521219	no
chr1	1702773	1725602	CDK11A	-0.466791	-0.49963	-0.522959	-1.11213	-0.528111	-1.11213	-0.436827	-0.482991	-0.611664	-0.675363	-0.692386	-0.462115	-0.781862	-0.645207	-0.781862	-0.803357	-0.850441	-0.906676	-0.441841	-0.428817	-0.487834	-0.506154	-0.38849	-0.506154	-0.465089	-0.499176	-0.521219	no
chr1	1725207	1752273	SLC35E2A	-0.466791	-0.49963	-0.522959	-0.281482	-0.528111	-0.528111	-0.436827	-0.482991	-0.611664	-0.675363	-0.692386	-0.462115	-0.781862	-0.645207	-0.781862	-0.803357	-0.850441	-0.906676	-0.441841	-0.428817	-0.487834	-0.506154	-0.38849	-0.506154	-0.465089	-0.499176	-0.521219	no
chr1	1752773	1786532	NADK	-0.466791	-0.49963	-0.522959	-0.281482	-0.528111	-0.528111	-0.436827	-0.482991	-0.611664	-0.675363	-0.692386	-0.462115	-0.781862	-0.645207	-0.781862	-0.803357	-0.850441	-0.906676	-0.441841	-0.428817	-0.487834	-0.506154	-0.38849	-0.506154	-0.465089	-0.499176	-0.521219	no
chr1	1787032	1891179	GNB1	-0.466791	-0.49963	-0.522959	-0.281482	-0.528111	-0.528111	-0.436827	-0.482991	-0.611664	-0.675363	-0.692386	-0.462115	-0.781862	-0.645207	-0.781862	-0.803357	-0.850441	-0.906676	-0.441841	-0.428817	-0.487834	-0.506154	-0.38849	-0.506154	-0.465089	-0.499176	-0.521219	no
chr1	1915113	1918040	CALML6	-0.466791	-0.49963	-0.522959	-0.281482	-0.528111	-0.528111	-0.436827	-0.482991	-0.611664	-0.675363	-0.692386	-0.462115	-0.781862	-0.645207	-0.781862	-0.803357	-0.850441	-0.906676	-0.441841	-0.428817	-0.487834	-0.506154	-0.38849	-0.506154	-0.465089	-0.499176	-0.521219	no
chr1	1917735	1922424	TMEM52	-0.466791	-0.49963	-0.522959	-0.281482	-0.528111	-0.528111	-0.436827	-0.482991	-0.611664	-0.675363	-0.692386	-0.462115	-0.781862	-0.645207	-0.781862	-0.803357	-0.850441	-0.906676	-0.441841	-0.428817	-0.487834	-0.506154	-0.38849	-0.506154	-0.465089	-0.499176	-0.521219	no
chr1	1922141	2018779	CFAP74	-0.466791	-0.49963	-0.522959	-0.281482	-0.528111	-0.528111	-0.436827	-0.482991	-0.611664	-0.675363	-0.692386	-0.462115	-0.781862	-0.645207	-0.781862	-0.803357	-0.850441	-0.906676	-0.441841	-0.428817	-0.487834	-0.506154	-0.38849	-0.506154	-0.465089	-0.499176	-0.521219	no
chr1	2024772	2050005	GABRD	-0.466791	-0.49963	-0.522959	-0.281482	-0.528111	-0.528111	-0.436827	-0.482991	-0.611664	-0.675363	-0.692386	-0.462115	-0.781862	-0.645207	-0.781862	-0.803357	-0.850441	-0.906676	-0.441841	-0.428817	-0.487834	-0.506154	-0.38849	-0.506154	-0.465089	-0.499176	-0.521219	no
chr1	2055191	2185967	PRKCZ	-0.466791	-0.49963	-0.522959	-0.281482	-0.528111	-0.528111	-0.436827	-0.482991	-0.611664	-0.675363	-0.692386	-0.462115	-0.781862	-0.645207	-0.781862	-0.803357	-0.850441	-0.906676	-0.441841	-0.428817	-0.487834	-0.506154	-0.38849	-0.506154	-0.465089	-0.499176	-0.521219	no
chr1	2185717	2212284	FAAP20	-0.466791	-0.49963	-0.522959	-0.281482	-0.528111	-0.528111	-0.436827	-0.482991	-0.611664	-0.675363	-0.692386	-0.462115	-0.781862	-0.645207	-0.781862	-0.803357	-0.850441	-0.906676	-0.441841	-0.428817	-0.487834	-0.506154	-0.38849	-0.506154	-0.465089	-0.499176	-0.521219	no
chr1	2229002	2320633	SKI	-0.466791	-0.49963	-0.522959	-0.281482	-0.528111	-0.528111	-0.436827	-0.482991	-0.611664	-0.675363	-0.692386	-0.462115	-0.781862	-0.645207	-0.781862	-0.803357	-0.850441	-0.906676	-0.441841	-0.428817	-0.487834	-0.506154	-0.38849	-0.506154	-0.465089	-0.499176	-0.521219	no
chr1	2321133	2395863	MORN1	-0.466791	-0.49963	-0.522959	-0.281482	-0.528111	-0.528111	-0.436827	-0.482991	-0.611664	-0.675363	-0.692386	-0.462115	-0.781862	-0.645207	-0.781862	-0.803357	-0.850441	-0.906676	-0.441841	-0.428817	-0.487834	-0.506154	-0.38849	-0.506154	-0.465089	-0.499176	-0.521219	no
chr1	2395637	2405744	RER1	-0.466791	-0.49963	-0.522959	-0.281482	-0.528111	-0.528111	-0.436827	-0.482991	-0.611664	-0.675363	-0.692386	-0.462115	-0.781862	-0.645207	-0.781862	-0.803357	-0.850441	-0.906676	-0.441841	-0.428817	-0.487834	-0.506154	-0.38849	-0.506154	-0.465089	-0.499176	-0.521219	no
chr1	2405537	2466978	PEX10	-0.466791	-0.49963	-0.522959	-0.281482	-0.528111	-0.528111	-0.436827	-0.482991	-0.611664	-0.675363	-0.692386	-0.462115	-0.781862	-0.645207	-0.781862	-0.803357	-0.850441	-0.906676	-0.441841	-0.428817	-0.487834	-0.506154	-0.38849	-0.506154	-0.465089	-0.499176	-0.521219	no
chr1	2467729	2508979	PLCH2	-0.466791	-0.49963	-0.522959	-0.281482	-0.528111	-0.528111	-0.436827	-0.482991	-0.611664	-0.675363	-0.692386	-0.462115	-0.781862	-0.645207	-0.781862	-0.803357	-0.850441	-0.906676	-0.441841	-0.428817	-0.487834	-0.506154	-0.38849	-0.506154	-0.465089	-0.499176	-0.521219	no
chr1	2508691	2555461	PANK4	-0.466791	-0.49963	-0.522959	-0.281482	-0.528111	-0.528111	-0.436827	-0.482991	-0.611664	-0.675363	-0.692386	-0.462115	-0.781862	-0.645207	-0.781862	-0.803357	-0.850441	-0.906676	-0.441841	-0.428817	-0.487834	-0.506154	-0.38849	-0.506154	-0.465089	-0.499176	-0.521219	no
chr1	2555961	2557731	TNFRSF14-AS1	-0.466791	-0.49963	-0.522959	-0.281482	-0.528111	-0.528111	-0.436827	-0.482991	-0.611664	-0.675363	-0.692386	-0.462115	-0.781862	-0.645207	-0.781862	-0.803357	-0.850441	-0.906676	-0.441841	-0.428817	-0.487834	-0.506154	-0.38849	-0.506154	-0.465089	-0.499176	-0.521219	no
chr1	2557522	2586210	TNFRSF14	-0.466791	-0.49963	-0.522959	-0.281482	-0.528111	-0.528111	-0.436827	-0.482991	-0.611664	-0.675363	-0.692386	-0.462115	-0.781862	-0.645207	-0.781862	-0.803357	-0.850441	-0.906676	-0.441841	-0.428817	-0.487834	-0.506154	-0.38849	-0.506154	-0.465089	-0.499176	-0.521219	no
chr1	2587551	2591954	FAM213B	-0.466791	-0.49963	-0.522959	-0.281482	-0.528111	-0.528111	-0.436827	-0.482991	-0.611664	-0.675363	-0.692386	-0.462115	-0.781862	-0.645207	-0.781862	-0.803357	-0.850441	-0.906676	-0.441841	-0.428817	-0.487834	-0.506154	-0.38849	-0.506154	-0.465089	-0.499176	-0.521219	no
chr1	2591752	2640673	MMEL1	-0.466791	-0.49963	-0.522959	-0.281482	-0.528111	-0.528111	-0.436827	-0.482991	-0.611664	-0.675363	-0.692386	-0.462115	-0.781862	-0.645207	-0.781862	-0.803357	-0.850441	-0.906676	-0.441841	-0.428817	-0.487834	-0.506154	-0.38849	-0.506154	-0.465089	-0.499176	-0.521219	no
chr1	2641173	2905638	TTC34	-0.466791	-0.49963	-0.522959	-0.281482	-0.528111	-0.528111	-0.436827	-0.482991	-0.611664	-0.675363	-0.692386	-0.462115	-0.781862	-0.645207	-0.781862	-0.803357	-0.850441	-0.906676	-0.441841	-0.428817	-0.487834	-0.506154	-0.38849	-0.506154	-0.465089	-0.499176	-0.521219	no
chr1	3021508	3063555	ACTRT2	-0.466791	-0.49963	-0.522959	-0.281482	-0.528111	-0.528111	-0.436827	-0.482991	-0.611664	-0.675363	-0.692386	-0.462115	-0.781862	-0.645207	-0.781862	-0.803357	-0.850441	-0.906676	-0.441841	-0.428817	-0.487834	-0.506154	-0.38849	-0.506154	-0.465089	-0.499176	-0.521219	no
chr1	3064055	3069407	LINC00982	-0.466791	-0.49963	-0.522959	-0.281482	-0.528111	-0.528111	-0.436827	-0.482991	-0.611664	-0.675363	-0.692386	-0.462115	-0.781862	-0.645207	-0.781862	-0.803357	-0.850441	-0.906676	-0.441841	-0.428817	-0.487834	-0.506154	-0.38849	-0.506154	-0.465089	-0.499176	-0.521219	no
chr1	3069058	3462333	PRDM16	-0.466791	-0.49963	-0.522959	-0.281482	-0.528111	-0.528111	-0.436827	-0.482991	-0.611664	-0.675363	-0.692386	-0.462115	-0.781862	-0.645207	-0.781862	-0.803357	-0.850441	-0.906676	-0.441841	-0.428817	-0.487834	-0.506154	-0.38849	-0.506154	-0.465089	-0.499176	-0.521219	yes
chr1	3462833	3490549	ARHGEF16	-0.466791	-0.49963	-0.522959	-0.33029	-0.528111	-0.528111	-0.436827	-0.482991	-0.611664	-0.675363	-0.692386	-0.505342	-0.781862	-0.683559	-0.781862	-0.803357	-0.850441	-0.906676	-0.441841	-0.428817	-0.487834	-0.506154	-0.38849	-0.506154	-0.465089	-0.499176	-0.521219	no
chr1	3490264	3624403	MEGF6	-0.466791	-0.49963	-0.522959	-0.644589	-0.528111	-0.644589	-0.436827	-0.482991	-0.611664	-0.675363	-0.692386	-0.780522	-0.781862	-0.958525	-0.958525	-0.803357	-0.850441	-0.906676	-0.441841	-0.428817	-0.487834	-0.506154	-0.38849	-0.506154	-0.465089	-0.499176	-0.521219	no
chr1	3625683	3631143	TPRG1L	-0.466791	-0.49963	-0.522959	-0.644589	-0.528111	-0.644589	-0.436827	-0.482991	-0.611664	-0.675363	-0.692386	-0.780522	-0.781862	-0.958525	-0.958525	-0.803357	-0.850441	-0.906676	-0.441841	-0.428817	-0.487834	-0.506154	-0.38849	-0.506154	-0.465089	-0.499176	-0.521219	no
chr1	3630903	3681668	WRAP73	-0.466791	-0.49963	-0.522959	-0.644589	-0.528111	-0.644589	-0.436827	-0.482991	-0.611664	-0.675363	-0.692386	-0.780522	-0.781862	-0.958525	-0.958525	-0.803357	-0.850441	-0.906676	-0.441841	-0.428817	-0.487834	-0.506154	-0.38849	-0.506154	-0.465089	-0.499176	-0.521219	no
chr1	3682168	3743369	TP73	-0.466791	-0.49963	-0.522959	-0.644589	-0.528111	-0.644589	-0.436827	-0.482991	-0.611664	-0.675363	-0.692386	-0.780522	-0.781862	-0.958525	-0.958525	-0.803357	-0.850441	-0.906676	-0.441841	-0.428817	-0.487834	-0.506154	-0.38849	-0.506154	-0.465089	-0.499176	-0.521219	no
chr1	3742994	3752691	TP73-AS1	-0.466791	-0.49963	-0.522959	-0.644589	-0.528111	-0.644589	-0.436827	-0.482991	-0.611664	-0.675363	-0.692386	-0.780522	-0.781862	-0.958525	-0.958525	-0.803357	-0.850441	-0.906676	-0.441841	-0.428817	-0.487834	-0.506154	-0.38849	-0.506154	-0.465089	-0.499176	-0.521219	no
chr1	3752408	3775355	CCDC27	-0.466791	-0.49963	-0.522959	-0.644589	-0.528111	-0.644589	-0.436827	-0.482991	-0.611664	-0.675363	-0.692386	-0.780522	-0.781862	-0.958525	-0.958525	-0.803357	-0.850441	-0.906676	-0.441841	-0.428817	-0.487834	-0.506154	-0.38849	-0.506154	-0.465089	-0.499176	-0.521219	no
chr1	3775123	3781267	SMIM1	-0.466791	-0.49963	-0.522959	-0.644589	-0.528111	-0.644589	-0.436827	-0.482991	-0.611664	-0.675363	-0.692386	-0.780522	-0.781862	-0.958525	-0.958525	-0.803357	-0.850441	-0.906676	-0.441841	-0.428817	-0.487834	-0.506154	-0.38849	-0.506154	-0.465089	-0.499176	-0.521219	no
chr1	3781018	3814722	LRRC47	-0.466791	-0.49963	-0.522959	-0.644589	-0.528111	-0.644589	-0.436827	-0.482991	-0.611664	-0.675363	-0.692386	-0.780522	-0.781862	-0.958525	-0.958525	-0.803357	-0.850441	-0.906676	-0.441841	-0.428817	-0.487834	-0.506154	-0.38849	-0.506154	-0.465089	-0.499176	-0.521219	no
chr1	3815222	3857808	CEP104	-0.466791	-0.49963	-0.522959	-0.644589	-0.528111	-0.644589	-0.436827	-0.482991	-0.611664	-0.675363	-0.692386	-0.780522	-0.781862	-0.958525	-0.958525	-0.803357	-0.850441	-0.906676	-0.441841	-0.428817	-0.487834	-0.506154	-0.38849	-0.506154	-0.465089	-0.499176	-0.521219	no
chr1	3857413	3890220	DFFB	-0.466791	-0.49963	-0.522959	-0.644589	-0.528111	-0.644589	-0.436827	-0.482991	-0.611664	-0.675363	-0.692386	-0.780522	-0.781862	-0.958525	-0.958525	-0.803357	-0.850441	-0.906676	-0.441841	-0.428817	-0.487834	-0.506154	-0.38849	-0.506154	-0.465089	-0.499176	-0.521219	no
chr1	3889844	4051753	C1orf174	-0.466791	-0.49963	-0.522959	-0.644589	-0.528111	-0.644589	-0.436827	-0.482991	-0.611664	-0.675363	-0.692386	-0.780522	-0.781862	-0.958525	-0.958525	-0.803357	-0.850441	-0.906676	-0.441841	-0.428817	-0.487834	-0.506154	-0.38849	-0.506154	-0.465089	-0.499176	-0.521219	no
chr1	4711759	4786814	AJAP1	-0.466791	-0.49963	-0.522959	-0.644589	-0.528111	-0.644589	-0.436827	-0.482991	-0.611664	-0.675363	-0.692386	-0.780522	-0.781862	-0.958525	-0.958525	-0.803357	-0.850441	-0.906676	-0.441841	-0.428817	-0.487834	-0.506154	-0.38849	-0.506154	-0.465089	-0.499176	-0.521219	no
chr1	5563968	5655639	MIR4417	-0.466791	-0.49963	-0.522959	-0.644589	-0.528111	-0.644589	-0.436827	-0.482991	-0.611664	-0.675363	-0.692386	-0.780522	-0.781862	-0.958525	-0.958525	-0.803357	-0.850441	-0.906676	-0.441841	-0.428817	-0.487834	-0.506154	-0.38849	-0.506154	-0.465089	-0.499176	-0.521219	no
chr1	5862555	5862959	MIR4689	-0.466791	-0.49963	-0.522959	-0.644589	-0.528111	-0.644589	-0.436827	-0.482991	-0.611664	-0.675363	-0.692386	-0.780522	-0.781862	-0.958525	-0.958525	-0.803357	-0.850441	-0.906676	-0.441841	-0.428817	-0.487834	-0.506154	-0.38849	-0.506154	-0.465089	-0.499176	-0.521219	no
chr1	5862757	6039827	NPHP4	-0.466791	-0.49963	-0.522959	-0.644589	-0.528111	-0.644589	-0.436827	-0.482991	-0.611664	-0.675363	-0.692386	-0.780522	-0.781862	-0.958525	-0.958525	-0.803357	-0.850441	-0.906676	-0.441841	-0.428817	-0.487834	-0.506154	-0.38849	-0.506154	-0.465089	-0.499176	-0.521219	no
chr1	6040327	6102034	KCNAB2	-0.466791	-0.49963	-0.522959	-0.644589	-0.528111	-0.644589	-0.436827	-0.482991	-0.611664	-0.675363	-0.692386	-0.780522	-0.781862	-0.958525	-0.958525	-0.803357	-0.850441	-0.906676	-0.441841	-0.428817	-0.487834	-0.506154	-0.38849	-0.506154	-0.465089	-0.499176	-0.521219	no
chr1	6101743	6179293	CHD5	-0.466791	-0.49963	-0.522959	-0.644589	-0.528111	-0.644589	-0.436827	-0.482991	-0.611664	-0.675363	-0.692386	-0.780522	-0.781862	-0.958525	-0.958525	-0.803357	-0.850441	-0.906676	-0.441841	-0.428817	-0.487834	-0.506154	-0.38849	-0.506154	-0.465089	-0.499176	-0.521219	no
chr1	6186618	6199993	RPL22	-0.466791	-0.49963	-0.522959	-0.644589	-0.528111	-0.644589	-0.436827	-0.482991	-0.611664	-0.675363	-0.692386	-0.780522	-0.781862	-0.958525	-0.958525	-0.803357	-0.850441	-0.906676	-0.441841	-0.428817	-0.487834	-0.506154	-0.38849	-0.506154	-0.465089	-0.499176	-0.521219	no
chr1	6206649	6225371	RNF207	-0.466791	-0.49963	-0.522959	-0.644589	-0.528111	-0.644589	-0.436827	-0.482991	-0.611664	-0.675363	-0.692386	-0.780522	-0.781862	-0.958525	-0.958525	-0.803357	-0.850441	-0.906676	-0.441841	-0.428817	-0.487834	-0.506154	-0.38849	-0.506154	-0.465089	-0.499176	-0.521219	no
chr1	6224978	6244474	ICMT	-0.466791	-0.49963	-0.522959	-0.644589	-0.528111	-0.644589	-0.436827	-0.482991	-0.611664	-0.675363	-0.692386	-0.780522	-0.781862	-0.958525	-0.958525	-0.803357	-0.850441	-0.906676	-0.441841	-0.428817	-0.487834	-0.506154	-0.38849	-0.506154	-0.465089	-0.499176	-0.521219	no
chr1	6244209	6250168	HES3	-0.466791	-0.49963	-0.522959	-0.644589	-0.528111	-0.644589	-0.436827	-0.482991	-0.611664	-0.675363	-0.692386	-0.780522	-0.781862	-0.958525	-0.958525	-0.803357	-0.850441	-0.906676	-0.441841	-0.428817	-0.487834	-0.506154	-0.38849	-0.506154	-0.465089	-0.499176	-0.521219	no
chr1	6249923	6264607	GPR153	-0.466791	-0.49963	-0.522959	-0.644589	-0.528111	-0.644589	-0.436827	-0.482991	-0.611664	-0.675363	-0.692386	-0.780522	-0.781862	-0.958525	-0.958525	-0.803357	-0.850441	-0.906676	-0.441841	-0.428817	-0.487834	-0.506154	-0.38849	-0.506154	-0.465089	-0.499176	-0.521219	no
chr1	6264387	6412592	ACOT7	-0.466791	-0.49963	-0.522959	-0.644589	-0.528111	-0.644589	-0.436827	-0.482991	-0.611664	-0.675363	-0.692386	-0.780522	-0.781862	-0.958525	-0.958525	-0.803357	-0.850441	-0.906676	-0.441841	-0.428817	-0.487834	-0.506154	-0.38849	-0.506154	-0.465089	-0.499176	-0.521219	no
chr1	6425198	6461227	ESPN	-0.466791	-0.49963	-0.522959	-0.644589	-0.528111	-0.644589	-0.436827	-0.482991	-0.611664	-0.675363	-0.692386	-0.780522	-0.781862	-0.958525	-0.958525	-0.803357	-0.850441	-0.906676	-0.441841	-0.428817	-0.487834	-0.506154	-0.38849	-0.506154	-0.465089	-0.499176	-0.521219	no
chr1	6460968	6467670	TNFRSF25	-0.466791	-0.49963	-0.522959	-0.644589	-0.528111	-0.644589	-0.436827	-0.482991	-0.611664	-0.675363	-0.692386	-0.780522	-0.781862	-0.958525	-0.958525	-0.803357	-0.850441	-0.906676	-0.441841	-0.428817	-0.487834	-0.506154	-0.38849	-0.506154	-0.465089	-0.499176	-0.521219	no
chr1	6467403	6525938	PLEKHG5	-0.466791	-0.49963	-0.522959	-0.644589	-0.528111	-0.644589	-0.436827	-0.482991	-0.611664	-0.675363	-0.692386	-0.780522	-0.781862	-0.958525	-0.958525	-0.803357	-0.850441	-0.906676	-0.441841	-0.428817	-0.487834	-0.506154	-0.38849	-0.506154	-0.465089	-0.499176	-0.521219	no
chr1	6525730	6555671	NOL9	-0.466791	-0.49963	-0.522959	-0.644589	-0.528111	-0.644589	-0.436827	-0.482991	-0.611664	-0.675363	-0.692386	-0.780522	-0.781862	-0.958525	-0.958525	-0.803357	-0.850441	-0.906676	-0.441841	-0.428817	-0.487834	-0.506154	-0.38849	-0.506154	-0.465089	-0.499176	-0.521219	no
chr1	6555306	6580659	TAS1R1	-0.466791	-0.49963	-0.522959	-0.644589	-0.528111	-0.644589	-0.436827	-0.482991	-0.611664	-0.675363	-0.692386	-0.780522	-0.781862	-0.958525	-0.958525	-0.803357	-0.850441	-0.906676	-0.441841	-0.428817	-0.487834	-0.506154	-0.38849	-0.506154	-0.465089	-0.499176	-0.521219	no
chr1	6580388	6593551	ZBTB48	-0.466791	-0.49963	-0.522959	-0.644589	-0.528111	-0.644589	-0.436827	-0.482991	-0.611664	-0.675363	-0.692386	-0.780522	-0.781862	-0.958525	-0.958525	-0.803357	-0.850441	-0.906676	-0.441841	-0.428817	-0.487834	-0.506154	-0.38849	-0.506154	-0.465089	-0.499176	-0.521219	no
chr1	6593304	6613411	KLHL21	-0.466791	-0.49963	-0.522959	-0.644589	-0.528111	-0.644589	-0.436827	-0.482991	-0.611664	-0.675363	-0.692386	-0.780522	-0.781862	-0.958525	-0.958525	-0.803357	-0.850441	-0.906676	-0.441841	-0.428817	-0.487834	-0.506154	-0.38849	-0.506154	-0.465089	-0.499176	-0.521219	no
chr1	6616518	6628716	PHF13	-0.466791	-0.49963	-0.522959	-0.644589	-0.528111	-0.644589	-0.436827	-0.482991	-0.611664	-0.675363	-0.692386	-0.780522	-0.781862	-0.958525	-0.958525	-0.803357	-0.850441	-0.906676	-0.441841	-0.428817	-0.487834	-0.506154	-0.38849	-0.506154	-0.465089	-0.499176	-0.521219	no
chr1	6628425	6635868	THAP3	-0.466791	-0.49963	-0.522959	-0.644589	-0.528111	-0.644589	-0.436827	-0.482991	-0.611664	-0.675363	-0.692386	-0.780522	-0.781862	-0.958525	-0.958525	-0.803357	-0.850441	-0.906676	-0.441841	-0.428817	-0.487834	-0.506154	-0.38849	-0.506154	-0.465089	-0.499176	-0.521219	no
chr1	6635616	6701094	DNAJC11	-0.466791	-0.49963	-0.522959	-0.644589	-0.528111	-0.644589	-0.436827	-0.482991	-0.611664	-0.675363	-0.692386	-0.780522	-0.781862	-0.958525	-0.958525	-0.803357	-0.850441	-0.906676	-0.441841	-0.428817	-0.487834	-0.506154	-0.38849	-0.506154	-0.465089	-0.499176	-0.521219	no
chr1	6806843	7773638	CAMTA1	-0.466791	-0.49963	-0.522959	-0.511552	-0.528111	-0.528111	-0.436827	-0.482991	-0.611664	-0.675363	-0.692386	-0.780522	-0.781862	-0.84969	-0.84969	-0.803357	-0.850441	-0.906676	-0.441841	-0.428817	-0.487834	-0.506154	-0.38849	-0.506154	-0.465089	-0.499176	-0.521219	yes
chr1	7773252	7785069	VAMP3	-0.466791	-0.49963	-0.522959	-0.29622	-0.528111	-0.528111	-0.436827	-0.482991	-0.611664	-0.675363	-0.692386	-0.780522	-0.781862	-0.690783	-0.781862	-0.803357	-0.850441	-0.906676	-0.441841	-0.428817	-0.487834	-0.506154	-0.38849	-0.506154	-0.465089	-0.499176	-0.521219	no
chr1	7784768	7846535	PER3	-0.466791	-0.49963	-0.522959	-0.29622	-0.528111	-0.528111	-0.436827	-0.482991	-0.611664	-0.675363	-0.692386	-0.780522	-0.781862	-0.690783	-0.781862	-0.803357	-0.850441	-0.906676	-0.441841	-0.428817	-0.487834	-0.506154	-0.38849	-0.506154	-0.465089	-0.499176	-0.521219	no
chr1	7847627	7920156	UTS2	-0.466791	-0.49963	-0.522959	-0.29622	-0.528111	-0.528111	-0.436827	-0.482991	-0.611664	-0.675363	-0.692386	-0.780522	-0.781862	-0.690783	-0.781862	-0.803357	-0.850441	-0.906676	-0.441841	-0.428817	-0.487834	-0.506154	-0.38849	-0.506154	-0.465089	-0.499176	-0.521219	no
chr1	7920656	7962192	TNFRSF9	-0.466791	-0.49963	-0.522959	-0.29622	-0.528111	-0.528111	-0.436827	-0.482991	-0.611664	-0.675363	-0.692386	-0.780522	-0.781862	-0.690783	-0.781862	-0.803357	-0.850441	-0.906676	-0.441841	-0.428817	-0.487834	-0.506154	-0.38849	-0.506154	-0.465089	-0.499176	-0.521219	no
chr1	7962692	8003885	PARK7	-0.466791	-0.49963	-0.522959	-0.29622	-0.528111	-0.528111	-0.436827	-0.482991	-0.611664	-0.675363	-0.692386	-0.780522	-0.781862	-0.690783	-0.781862	-0.803357	-0.850441	-0.906676	-0.441841	-0.428817	-0.487834	-0.506154	-0.38849	-0.506154	-0.465089	-0.499176	-0.521219	no
chr1	8013037	8166853	ERRFI1	-0.466791	-0.49963	-0.522959	-0.29622	-0.528111	-0.528111	-0.436827	-0.482991	-0.611664	-0.675363	-0.692386	-0.780522	-0.781862	-0.690783	-0.781862	-0.803357	-0.850441	-0.906676	-0.441841	-0.428817	-0.487834	-0.506154	-0.38849	-0.506154	-0.465089	-0.499176	-0.521219	no
chr1	8324126	8354419	SLC45A1	-0.466791	-0.49963	-0.522959	-0.29622	-0.528111	-0.528111	-0.436827	-0.482991	-0.611664	-0.675363	-0.692386	-0.780522	-0.781862	-0.690783	-0.781862	-0.803357	-0.850441	-0.906676	-0.441841	-0.428817	-0.487834	-0.506154	-0.38849	-0.506154	-0.465089	-0.499176	-0.521219	no
chr1	8354919	8860751	RERE	-0.466791	-0.49963	-0.522959	-0.29622	-0.528111	-0.528111	-0.436827	-0.482991	-0.611664	-0.675363	-0.692386	-0.780522	-0.781862	-0.690783	-0.781862	-0.803357	-0.850441	-0.906676	-0.441841	-0.428817	-0.487834	-0.506154	-0.38849	-0.506154	-0.465089	-0.499176	-0.521219	no
chr1	8861251	8945171	ENO1	-0.466791	-0.49963	-0.522959	-0.29622	-0.528111	-0.528111	-0.436827	-0.482991	-0.611664	-0.675363	-0.692386	-0.780522	-0.781862	-0.690783	-0.781862	-0.803357	-0.850441	-0.906676	-0.441841	-0.428817	-0.487834	-0.506154	-0.38849	-0.506154	-0.465089	-0.499176	-0.521219	no
chr1	8945671	9002742	CA6	-0.466791	-0.49963	-0.522959	-0.29622	-0.528111	-0.528111	-0.436827	-0.482991	-0.611664	-0.675363	-0.692386	-0.780522	-0.781862	-0.690783	-0.781862	-0.803357	-0.850441	-0.906676	-0.441841	-0.428817	-0.487834	-0.506154	-0.38849	-0.506154	-0.465089	-0.499176	-0.521219	no
chr1	9003242	9036971	SLC2A7	-0.466791	-0.49963	-0.522959	-0.29622	-0.44903	-0.44903	-0.436827	-0.482991	-0.611664	-0.675363	-0.692386	-0.780522	-0.781862	-0.690783	-0.781862	-0.803357	-0.850441	-0.906676	-0.441841	-0.428817	-0.487834	-0.506154	-0.38849	-0.506154	-0.465089	-0.499176	-0.521219	no
chr1	9037471	9103763	SLC2A5	-0.466791	-0.49963	-0.522959	-0.29622	-0.291181	-0.29622	-0.436827	-0.482991	-0.611664	-0.675363	-0.692386	-0.780522	-0.781862	-0.690783	-0.781862	-0.803357	-0.850441	-0.906676	-0.441841	-0.428817	-0.487834	-0.506154	-0.38849	-0.506154	-0.465089	-0.499176	-0.521219	no
chr1	9104263	9151027	GPR157	-0.466791	-0.49963	-0.522959	-0.29622	-0.291181	-0.29622	-0.436827	-0.482991	-0.611664	-0.675363	-0.692386	-0.780522	-0.781862	-0.690783	-0.781862	-0.803357	-0.850441	-0.906676	-0.441841	-0.428817	-0.487834	-0.506154	-0.38849	-0.506154	-0.465089	-0.499176	-0.521219	no
chr1	9151527	9239358	MIR34AHG	-0.466791	-0.49963	-0.522959	-0.29622	-0.291181	-0.29622	-0.436827	-0.482991	-0.611664	-0.675363	-0.692386	-0.780522	-0.781862	-0.690783	-0.781862	-0.803357	-0.850441	-0.906676	-0.441841	-0.428817	-0.487834	-0.506154	-0.38849	-0.506154	-0.465089	-0.499176	-0.521219	no
chr1	9239858	9355300	H6PD	-0.466791	-0.49963	-0.522959	-0.29622	-0.291181	-0.29622	-0.436827	-0.482991	-0.611664	-0.675363	-0.692386	-0.780522	-0.781862	-0.690783	-0.781862	-0.803357	-0.850441	-0.906676	-0.441841	-0.428817	-0.487834	-0.506154	-0.38849	-0.506154	-0.465089	-0.499176	-0.521219	no
chr1	9355800	9539114	SPSB1	-0.466791	-0.49963	-0.522959	-0.29622	-0.291181	-0.29622	-0.436827	-0.482991	-0.611664	-0.675363	-0.692386	-0.780522	-0.781862	-0.690783	-0.781862	-0.803357	-0.850441	-0.906676	-0.441841	-0.428817	-0.487834	-0.506154	-0.38849	-0.506154	-0.465089	-0.499176	-0.521219	no
chr1	9553617	9596097	SLC25A33	-0.466791	-0.49963	-0.522959	-0.29622	-0.291181	-0.29622	-0.436827	-0.482991	-0.611664	-0.675363	-0.692386	-0.780522	-0.781862	-0.690783	-0.781862	-0.803357	-0.850441	-0.906676	-0.441841	-0.428817	-0.487834	-0.506154	-0.38849	-0.506154	-0.465089	-0.499176	-0.521219	no
chr1	9595720	9653100	TMEM201	-0.466791	-0.49963	-0.522959	-0.29622	-0.291181	-0.29622	-0.436827	-0.482991	-0.611664	-0.675363	-0.692386	-0.780522	-0.781862	-0.690783	-0.781862	-0.803357	-0.850441	-0.906676	-0.441841	-0.428817	-0.487834	-0.506154	-0.38849	-0.506154	-0.465089	-0.499176	-0.521219	no
chr1	9653600	9730836	PIK3CD	-0.466791	-0.49963	-0.522959	-0.29622	-0.291181	-0.29622	-0.436827	-0.482991	-0.611664	-0.675363	-0.692386	-0.780522	-0.781862	-0.690783	-0.781862	-0.803357	-0.850441	-0.906676	-0.441841	-0.428817	-0.487834	-0.506154	-0.38849	-0.506154	-0.465089	-0.499176	-0.521219	no
chr1	9730446	9822867	CLSTN1	-0.466791	-0.49963	-0.522959	-0.29622	-0.291181	-0.29622	-0.436827	-0.482991	-0.611664	-0.675363	-0.692386	-0.780522	-0.781862	-0.690783	-0.781862	-0.803357	-0.850441	-0.906676	-0.441841	-0.428817	-0.487834	-0.506154	-0.38849	-0.506154	-0.465089	-0.499176	-0.521219	no
chr1	9850555	9929733	CTNNBIP1	-0.466791	-0.49963	-0.522959	-0.29622	-0.291181	-0.29622	-0.436827	-0.482991	-0.611664	-0.675363	-0.692386	-0.780522	-0.781862	-0.690783	-0.781862	-0.803357	-0.850441	-0.906676	-0.441841	-0.428817	-0.487834	-0.506154	-0.38849	-0.506154	-0.465089	-0.499176	-0.521219	no
chr1	9930233	9966711	LZIC	-0.466791	-0.49963	-0.522959	-0.29622	-0.291181	-0.29622	-0.436827	-0.482991	-0.611664	-0.675363	-0.692386	-0.780522	-0.781862	-0.690783	-0.781862	-0.803357	-0.850441	-0.906676	-0.441841	-0.428817	-0.487834	-0.506154	-0.38849	-0.506154	-0.465089	-0.499176	-0.521219	no
chr1	9967211	9996628	NMNAT1	-0.466791	-0.49963	-0.522959	-0.29622	-0.291181	-0.29622	-0.436827	-0.482991	-0.611664	-0.675363	-0.692386	-0.780522	-0.781862	-0.690783	-0.781862	-0.803357	-0.850441	-0.906676	-0.441841	-0.428817	-0.487834	-0.506154	-0.38849	-0.506154	-0.465089	-0.499176	-0.521219	no
chr1	10007471	10033022	RBP7	-0.466791	-0.49963	-0.522959	-0.29622	-0.291181	-0.29622	-0.436827	-0.482991	-0.611664	-0.675363	-0.692386	-0.780522	-0.781862	-0.690783	-0.781862	-0.803357	-0.850441	-0.906676	-0.441841	-0.428817	-0.487834	-0.506154	-0.38849	-0.506154	-0.465089	-0.499176	-0.521219	no
chr1	10033522	10227178	UBE4B	-0.466791	-0.49963	-0.522959	-0.29622	-0.291181	-0.29622	-0.436827	-0.482991	-0.611664	-0.675363	-0.692386	-0.780522	-0.781862	-0.690783	-0.781862	-0.803357	-0.850441	-0.906676	-0.441841	-0.428817	-0.487834	-0.506154	-0.38849	-0.506154	-0.465089	-0.499176	-0.521219	no
chr1	10227678	10398321	KIF1B	-0.466791	-0.49963	-0.522959	-0.29622	-0.291181	-0.29622	-0.436827	-0.482991	-0.611664	-0.675363	-0.692386	-0.780522	-0.781862	-0.690783	-0.781862	-0.803357	-0.850441	-0.906676	-0.441841	-0.428817	-0.487834	-0.506154	-0.38849	-0.506154	-0.465089	-0.499176	-0.521219	no
chr1	10398821	10430735	PGD	-0.466791	-0.49963	-0.522959	-0.29622	-0.291181	-0.29622	-0.436827	-0.482991	-0.611664	-0.675363	-0.692386	-0.780522	-0.781862	-0.690783	-0.781862	-0.803357	-0.850441	-0.906676	-0.441841	-0.428817	-0.487834	-0.506154	-0.38849	-0.506154	-0.465089	-0.499176	-0.521219	no
chr1	10430440	10461544	CENPS-CORT	-0.466791	-0.49963	-0.522959	-0.29622	-0.291181	-0.29622	-0.436827	-0.482991	-0.611664	-0.675363	-0.692386	-0.780522	-0.781862	-0.690783	-0.781862	-0.803357	-0.850441	-0.906676	-0.441841	-0.428817	-0.487834	-0.506154	-0.38849	-0.506154	-0.465089	-0.499176	-0.521219	no
chr1	10461334	10475141	DFFA	-0.466791	-0.49963	-0.522959	-0.29622	-0.291181	-0.29622	-0.436827	-0.482991	-0.611664	-0.675363	-0.692386	-0.780522	-0.781862	-0.690783	-0.781862	-0.803357	-0.850441	-0.906676	-0.441841	-0.428817	-0.487834	-0.506154	-0.38849	-0.506154	-0.465089	-0.499176	-0.521219	no
chr1	10474748	10639660	PEX14	-0.466791	-0.49963	-0.522959	-0.29622	-0.291181	-0.29622	-0.436827	-0.482991	-0.611664	-0.675363	-0.692386	-0.780522	-0.781862	-0.690783	-0.781862	-0.803357	-0.850441	-0.906676	-0.441841	-0.428817	-0.487834	-0.506154	-0.38849	-0.506154	-0.465089	-0.499176	-0.521219	no
chr1	10639415	10821000	CASZ1	-0.466791	-0.49963	-0.522959	-0.29622	-0.291181	-0.29622	-0.436827	-0.482991	-0.611664	-0.675363	-0.692386	-0.780522	-0.781862	-0.690783	-0.781862	-0.803357	-0.850441	-0.906676	-0.441841	-0.428817	-0.487834	-0.506154	-0.38849	-0.506154	-0.465089	-0.499176	-0.521219	no
chr1	10947510	11012995	C1orf127	-0.466791	-0.49963	-0.522959	-0.29622	-0.291181	-0.29622	-0.436827	-0.482991	-0.611664	-0.675363	-0.692386	-0.780522	-0.781862	-0.690783	-0.781862	-0.803357	-0.850441	-0.906676	-0.441841	-0.428817	-0.487834	-0.506154	-0.38849	-0.506154	-0.465089	-0.499176	-0.521219	no
chr1	11013495	11025974	TARDBP	-0.466791	-0.49963	-0.522959	-0.29622	-0.291181	-0.29622	-0.436827	-0.482991	-0.611664	-0.675363	-0.692386	-0.780522	-0.781862	-0.690783	-0.781862	-0.803357	-0.850441	-0.906676	-0.441841	-0.428817	-0.487834	-0.506154	-0.38849	-0.506154	-0.465089	-0.499176	-0.521219	no
chr1	11026801	11054953	MASP2	-0.466791	-0.49963	-0.522959	-0.29622	-0.291181	-0.29622	-0.436827	-0.482991	-0.611664	-0.675363	-0.692386	-0.780522	-0.781862	-0.690783	-0.781862	-0.803357	-0.850441	-0.906676	-0.441841	-0.428817	-0.487834	-0.506154	-0.38849	-0.506154	-0.465089	-0.499176	-0.521219	no
chr1	11054718	11066686	SRM	-0.466791	-0.49963	-0.522959	-0.29622	-0.291181	-0.29622	-0.436827	-0.482991	-0.611664	-0.675363	-0.692386	-0.780522	-0.781862	-0.690783	-0.781862	-0.803357	-0.850441	-0.906676	-0.441841	-0.428817	-0.487834	-0.506154	-0.38849	-0.506154	-0.465089	-0.499176	-0.521219	no
chr1	11066433	11107142	EXOSC10	-0.466791	-0.49963	-0.522959	-0.29622	-0.291181	-0.29622	-0.436827	-0.482991	-0.611664	-0.675363	-0.692386	-0.780522	-0.781862	-0.690783	-0.781862	-0.803357	-0.850441	-0.906676	-0.441841	-0.428817	-0.487834	-0.506154	-0.38849	-0.506154	-0.465089	-0.499176	-0.521219	no
chr1	11106836	11272879	MTOR	-0.466791	-0.49963	-0.522959	-0.29622	-0.291181	-0.29622	-0.436827	-0.482991	-0.611664	-0.675363	-0.692386	-0.780522	-0.781862	-0.690783	-0.781862	-0.803357	-0.850441	-0.906676	-0.441841	-0.428817	-0.487834	-0.506154	-0.38849	-0.506154	-0.465089	-0.499176	-0.521219	yes
chr1	11273379	11500208	UBIAD1	-0.466791	-0.49963	-0.522959	-0.29622	-0.291181	-0.29622	-0.436827	-0.482991	-0.611664	-0.675363	-0.692386	-0.780522	-0.781862	-0.690783	-0.781862	-0.803357	-0.850441	-0.906676	-0.441841	-0.428817	-0.487834	-0.506154	-0.38849	-0.506154	-0.465089	-0.499176	-0.521219	no
chr1	11500708	11647589	DISP3	-0.466791	-0.49963	-0.522959	-0.29622	-0.291181	-0.29622	-0.436827	-0.482991	-0.611664	-0.675363	-0.692386	-0.780522	-0.781862	-0.690783	-0.781862	-0.803357	-0.850441	-0.906676	-0.441841	-0.428817	-0.487834	-0.506154	-0.38849	-0.506154	-0.465089	-0.499176	-0.521219	no
chr1	11648089	11655927	FBXO2	-0.466791	-0.49963	-0.522959	-0.29622	-0.291181	-0.29622	-0.436827	-0.482991	-0.611664	-0.675363	-0.692386	-0.780522	-0.781862	-0.690783	-0.781862	-0.803357	-0.850441	-0.906676	-0.441841	-0.428817	-0.487834	-0.506154	-0.38849	-0.506154	-0.465089	-0.499176	-0.521219	no
chr1	11655652	11668781	FBXO44	-0.466791	-0.49963	-0.522959	-0.29622	-0.291181	-0.29622	-0.436827	-0.482991	-0.611664	-0.675363	-0.692386	-0.780522	-0.781862	-0.690783	-0.781862	-0.803357	-0.850441	-0.906676	-0.441841	-0.428817	-0.487834	-0.506154	-0.38849	-0.506154	-0.465089	-0.499176	-0.521219	no
chr1	11668506	11674963	FBXO6	-0.466791	-0.49963	-0.522959	-0.29622	-0.291181	-0.29622	-0.436827	-0.482991	-0.611664	-0.675363	-0.692386	-0.780522	-0.781862	-0.690783	-0.781862	-0.803357	-0.850441	-0.906676	-0.441841	-0.428817	-0.487834	-0.506154	-0.38849	-0.506154	-0.465089	-0.499176	-0.521219	no
chr1	11674630	11705623	MAD2L2	-0.466791	-0.49963	-0.522959	-0.29622	-0.291181	-0.29622	-0.436827	-0.482991	-0.611664	-0.675363	-0.692386	-0.780522	-0.781862	-0.690783	-0.781862	-0.803357	-0.850441	-0.906676	-0.441841	-0.428817	-0.487834	-0.506154	-0.38849	-0.506154	-0.465089	-0.499176	-0.521219	no
chr1	11706123	11722438	DRAXIN	-0.466791	-0.49963	-0.522959	-0.29622	-0.291181	-0.29622	-0.436827	-0.482991	-0.611664	-0.675363	-0.692386	-0.780522	-0.781862	-0.690783	-0.781862	-0.803357	-0.850441	-0.906676	-0.441841	-0.428817	-0.487834	-0.506154	-0.38849	-0.506154	-0.465089	-0.499176	-0.521219	no
chr1	11736258	11761205	AGTRAP	-0.466791	-0.49963	-0.522959	-0.29622	-0.291181	-0.29622	-0.436827	-0.482991	-0.611664	-0.675363	-0.692386	-0.780522	-0.781862	-0.690783	-0.781862	-0.803357	-0.850441	-0.906676	-0.441841	-0.428817	-0.487834	-0.506154	-0.38849	-0.506154	-0.465089	-0.499176	-0.521219	no
chr1	11761954	11790978	C1orf167	-0.466791	-0.49963	-0.522959	-0.29622	-0.291181	-0.29622	-0.436827	-0.482991	-0.611664	-0.675363	-0.692386	-0.780522	-0.781862	-0.690783	-0.781862	-0.803357	-0.850441	-0.906676	-0.441841	-0.428817	-0.487834	-0.506154	-0.38849	-0.506154	-0.465089	-0.499176	-0.521219	no
chr1	11790602	11806456	MTHFR	-0.466791	-0.49963	-0.522959	-0.29622	-0.291181	-0.29622	-0.436827	-0.482991	-0.611664	-0.675363	-0.692386	-0.780522	-0.781862	-0.690783	-0.781862	-0.803357	-0.850441	-0.906676	-0.441841	-0.428817	-0.487834	-0.506154	-0.38849	-0.506154	-0.465089	-0.499176	-0.521219	no
chr1	11806250	11846215	CLCN6	-0.466791	-0.49963	-0.522959	-0.29622	-0.291181	-0.29622	-0.436827	-0.482991	-0.611664	-0.675363	-0.692386	-0.780522	-0.781862	-0.690783	-0.781862	-0.803357	-0.850441	-0.906676	-0.441841	-0.428817	-0.487834	-0.506154	-0.38849	-0.506154	-0.465089	-0.499176	-0.521219	no
chr1	11845847	11857605	NPPA	-0.466791	-0.49963	-0.522959	-0.29622	-0.291181	-0.29622	-0.436827	-0.482991	-0.611664	-0.675363	-0.692386	-0.780522	-0.781862	-0.690783	-0.781862	-0.803357	-0.850441	-0.906676	-0.441841	-0.428817	-0.487834	-0.506154	-0.38849	-0.506154	-0.465089	-0.499176	-0.521219	no
chr1	11857394	11910463	NPPB	-0.466791	-0.49963	-0.522959	-0.29622	-0.291181	-0.29622	-0.436827	-0.482991	-0.611664	-0.675363	-0.692386	-0.780522	-0.781862	-0.690783	-0.781862	-0.803357	-0.850441	-0.906676	-0.441841	-0.428817	-0.487834	-0.506154	-0.38849	-0.506154	-0.465089	-0.499176	-0.521219	no
chr1	11920199	11935253	KIAA2013	-0.466791	-0.49963	-0.522959	-0.29622	-0.291181	-0.29622	-0.436827	-0.482991	-0.611664	-0.675363	-0.692386	-0.780522	-0.781862	-0.690783	-0.781862	-0.803357	-0.850441	-0.906676	-0.441841	-0.428817	-0.487834	-0.506154	-0.38849	-0.506154	-0.465089	-0.499176	-0.521219	no
chr1	11934994	11988523	PLOD1	-0.466791	-0.49963	-0.522959	-0.29622	-0.291181	-0.29622	-0.436827	-0.482991	-0.611664	-0.675363	-0.692386	-0.780522	-0.781862	-0.690783	-0.781862	-0.803357	-0.850441	-0.906676	-0.441841	-0.428817	-0.487834	-0.506154	-0.38849	-0.506154	-0.465089	-0.499176	-0.521219	no
chr1	11989023	12021855	MFN2	-0.466791	-0.49963	-0.522959	-0.29622	-0.291181	-0.29622	-0.436827	-0.482991	-0.611664	-0.675363	-0.692386	-0.780522	-0.781862	-0.690783	-0.781862	-0.803357	-0.850441	-0.906676	-0.441841	-0.428817	-0.487834	-0.506154	-0.38849	-0.506154	-0.465089	-0.499176	-0.521219	no
chr1	12021602	12062971	MIIP	-0.466791	-0.49963	-0.522959	-0.29622	-0.291181	-0.29622	-0.436827	-0.482991	-0.611664	-0.675363	-0.692386	-0.780522	-0.781862	-0.690783	-0.781862	-0.803357	-0.850441	-0.906676	-0.441841	-0.428817	-0.487834	-0.506154	-0.38849	-0.506154	-0.465089	-0.499176	-0.521219	no
chr1	12063711	12166310	TNFRSF8	-0.466791	-0.49963	-0.522959	-0.29622	-0.291181	-0.29622	-0.436827	-0.482991	-0.611664	-0.675363	-0.692386	-0.780522	-0.781862	-0.690783	-0.781862	-0.803357	-0.850441	-0.906676	-0.441841	-0.428817	-0.487834	-0.506154	-0.38849	-0.506154	-0.465089	-0.499176	-0.521219	no
chr1	12167568	12233632	TNFRSF1B	-0.466791	-0.49963	-0.522959	-0.29622	-0.291181	-0.29622	-0.436827	-0.482991	-0.611664	-0.675363	-0.692386	-0.780522	-0.781862	-0.690783	-0.781862	-0.803357	-0.850441	-0.906676	-0.441841	-0.428817	-0.487834	-0.506154	-0.38849	-0.506154	-0.465089	-0.499176	-0.521219	no
chr1	12234132	12567690	VPS13D	-0.466791	-0.49963	-0.522959	-0.29622	-0.291181	-0.29622	-0.436827	-0.482991	-0.611664	-0.675363	-0.692386	-0.780522	-0.781862	-0.690783	-0.781862	-0.803357	-0.850441	-0.906676	-0.441841	-0.428817	-0.487834	-0.506154	-0.38849	-0.506154	-0.465089	-0.499176	-0.521219	no
chr1	12568190	12643985	DHRS3	-0.466791	-0.49963	-0.522959	-0.29622	-0.291181	-0.29622	-0.436827	-0.482991	-0.611664	-0.675363	-0.692386	-0.780522	-0.781862	-0.690783	-0.781862	-0.803357	-0.850441	-0.906676	-0.441841	-0.428817	-0.487834	-0.506154	-0.38849	-0.506154	-0.465089	-0.499176	-0.521219	no
chr1	12644485	12715611	AADACL4	-0.466791	-0.49963	-0.522959	-0.29622	-0.291181	-0.29622	-0.436827	-0.482991	-0.611664	-0.675363	-0.692386	-0.780522	-0.781862	-0.690783	-0.781862	-0.803357	-0.850441	-0.906676	-0.441841	-0.428817	-0.487834	-0.506154	-0.38849	-0.506154	-0.465089	-0.499176	-0.521219	no
chr1	12716111	12745781	AADACL3	-0.466791	-0.49963	-0.522959	-0.29622	-0.291181	-0.29622	-0.436827	-0.482991	-0.611664	-0.675363	-0.692386	-0.780522	-0.781862	-0.690783	-0.781862	-0.803357	-0.850441	-0.906676	-0.441841	-0.428817	-0.487834	-0.506154	-0.38849	-0.506154	-0.465089	-0.499176	-0.521219	no
chr1	12746281	12774106	C1orf158	-0.466791	-0.49963	-0.522959	-0.29622	-0.291181	-0.29622	-0.436827	-0.482991	-0.611664	-0.675363	-0.692386	-0.780522	-0.781862	-0.690783	-0.781862	-0.803357	-0.850441	-0.906676	-0.441841	-0.428817	-0.487834	-0.506154	-0.38849	-0.506154	-0.465089	-0.499176	-0.521219	no
chr1	12774606	12792565	PRAMEF12	-0.466791	-0.49963	-0.522959	-0.29622	-0.291181	-0.29622	-0.436827	-0.482991	-0.611664	-0.675363	-0.692386	-0.780522	-0.781862	-0.690783	-0.781862	-0.803357	-0.850441	-0.906676	-0.441841	-0.428817	-0.487834	-0.506154	-0.38849	-0.506154	-0.465089	-0.499176	-0.521219	no
chr1	12793065	12824323	PRAMEF1	-0.466791	-0.49963	-0.522959	-0.29622	-0.291181	-0.29622	-0.436827	-0.482991	-0.611664	-0.675363	-0.692386	-0.780522	-0.781862	-0.690783	-0.781862	-0.803357	-0.850441	-0.906676	-0.441841	-0.428817	-0.487834	-0.506154	-0.38849	-0.506154	-0.465089	-0.499176	-0.521219	no
chr1	12824823	12838992	PRAMEF11	-0.466791	-0.49963	-0.522959	-0.29622	-0.291181	-0.29622	-0.436827	-0.482991	-0.611664	-0.675363	-0.692386	-0.780522	-0.781862	-0.690783	-0.781862	-0.803357	-0.850441	-0.906676	-0.441841	-0.428817	-0.487834	-0.506154	-0.38849	-0.506154	-0.465089	-0.499176	-0.521219	no
chr1	12847367	12859050	HNRNPCL1	-0.466791	-0.49963	-0.522959	-0.29622	-0.291181	-0.29622	-0.436827	-0.482991	-0.611664	-0.675363	-0.692386	-0.780522	-0.781862	-0.690783	-0.781862	-0.803357	-0.850441	-0.906676	-0.441841	-0.428817	-0.487834	-0.506154	-0.38849	-0.506154	-0.465089	-0.499176	-0.521219	no
chr1	12858754	12878929	PRAMEF2	-0.466791	-0.49963	-0.522959	-0.29622	-0.291181	-0.29622	-0.436827	-0.482991	-0.611664	-0.675363	-0.692386	-0.780522	-0.781862	-0.690783	-0.781862	-0.803357	-0.850441	-0.906676	-0.441841	-0.428817	-0.487834	-0.506154	-0.38849	-0.506154	-0.465089	-0.499176	-0.521219	no
chr1	12879429	12893010	PRAMEF4	-0.466791	-0.49963	-0.522959	-0.29622	-0.291181	-0.29622	-0.436827	-0.482991	-0.611664	-0.675363	-0.692386	-0.780522	-0.781862	-0.690783	-0.781862	-0.803357	-0.850441	-0.906676	-0.441841	-0.428817	-0.487834	-0.506154	-0.38849	-0.506154	-0.465089	-0.499176	-0.521219	no
chr1	12892762	12917150	PRAMEF10	-0.466791	-0.49963	-0.522959	-0.29622	-0.291181	-0.29622	-0.436827	-0.482991	-0.611664	-0.675363	-0.692386	-0.780522	-0.781862	-0.690783	-0.781862	-0.803357	-0.850441	-0.906676	-0.441841	-0.428817	-0.487834	-0.506154	-0.38849	-0.506154	-0.465089	-0.499176	-0.521219	no
chr1	12917650	12928086	PRAMEF7	-0.466791	-0.49963	-0.522959	-0.29622	-0.291181	-0.29622	-0.436827	-0.482991	-0.611664	-0.675363	-0.692386	-0.780522	-0.781862	-0.690783	-0.781862	-0.803357	-0.850441	-0.906676	-0.441841	-0.428817	-0.487834	-0.506154	-0.38849	-0.506154	-0.465089	-0.499176	-0.521219	no
chr1	12938536	12952830	PRAMEF6	-0.466791	-0.49963	-0.522959	-0.29622	-0.291181	-0.29622	-0.436827	-0.482991	-0.611664	-0.675363	-0.692386	-0.780522	-0.781862	-0.690783	-0.781862	-0.803357	-0.850441	-0.906676	-0.441841	-0.428817	-0.487834	-0.506154	-0.38849	-0.506154	-0.465089	-0.499176	-0.521219	no
chr1	13049732	13061399	PRAMEF27	-0.466791	-0.49963	-0.522959	-0.29622	-0.291181	-0.29622	-0.436827	-0.482991	-0.611664	-0.675363	-0.692386	-0.780522	-0.781862	-0.690783	-0.781862	-0.803357	-0.850441	-0.906676	-0.441841	-0.428817	-0.487834	-0.506154	-0.38849	-0.506154	-0.465089	-0.499176	-0.521219	no
chr1	13061153	13175461	HNRNPCL4	-0.466791	-0.49963	-0.522959	-0.29622	-0.291181	-0.29622	-0.436827	-0.482991	-0.611664	-0.675363	-0.692386	-0.780522	-0.781862	-0.690783	-0.781862	-0.803357	-0.850441	-0.906676	-0.441841	-0.428817	-0.487834	-0.506154	-0.38849	-0.506154	-0.465089	-0.499176	-0.521219	no
chr1	13073648	13164398	PRAMEF25	-0.466791	-0.49963	-0.522959	-0.29622	-0.291181	-0.29622	-0.436827	-0.482991	-0.611664	-0.675363	-0.692386	-0.780522	-0.781862	-0.690783	-0.781862	-0.803357	-0.850441	-0.906676	-0.441841	-0.428817	-0.487834	-0.506154	-0.38849	-0.506154	-0.465089	-0.499176	-0.521219	no
chr1	13115416	13148622	HNRNPCL2	-0.466791	-0.49963	-0.522959	-0.29622	-0.291181	-0.29622	-0.436827	-0.482991	-0.611664	-0.675363	-0.692386	-0.780522	-0.781862	-0.690783	-0.781862	-0.803357	-0.850441	-0.906676	-0.441841	-0.428817	-0.487834	-0.506154	-0.38849	-0.506154	-0.465089	-0.499176	-0.521219	no
chr1	13175228	13196284	PRAMEF9	-0.466791	-0.49963	-0.522959	-0.29622	-0.508672	-0.508672	-0.436827	-0.482991	-0.611664	-0.675363	-0.692386	-0.780522	-0.781862	-0.690783	-0.781862	-0.803357	-0.850441	-0.906676	-0.441841	-0.428817	-0.487834	-0.506154	-0.38849	-0.506154	-0.465089	-0.499176	-0.521219	no
chr1	13196784	13222711	PRAMEF13	-0.466791	-0.49963	-0.522959	-2.22758	-2.26747	-2.26747	-0.436827	-0.482991	-0.611664	-0.675363	-0.692386	-0.780522	-0.781862	-3.14367	-3.14367	-0.803357	-0.850441	-0.906676	-0.441841	-0.428817	-0.487834	-0.506154	-0.38849	-0.506154	-0.465089	-0.499176	-0.521219	no
chr1	13223211	13245893	PRAMEF18	-0.466791	-0.49963	-0.522959	-1.02623	-2.26747	-2.26747	-0.436827	-0.482991	-0.611664	-0.675363	-0.692386	-0.780522	-0.781862	-1.13174	-1.13174	-0.803357	-0.850441	-0.906676	-0.441841	-0.428817	-0.487834	-0.506154	-0.38849	-0.506154	-0.465089	-0.499176	-0.521219	no
chr1	13259210	13273702	PRAMEF5	-0.466791	-0.49963	-0.522959	-0.426062	0	-0.426062	-0.436827	-0.482991	-0.611664	-0.675363	-0.692386	-0.780522	-0.781862	-0.802278	-0.802278	-0.803357	-0.850441	-0.906676	-0.441841	-0.428817	-0.487834	-0.506154	-0.38849	-0.506154	-0.465089	-0.499176	-0.521219	no
chr1	13281298	13305402	PRAMEF8	-0.466791	-0.49963	-0.522959	-0.426062	0	-0.426062	-0.436827	-0.482991	-0.611664	-0.675363	-0.692386	-0.780522	-0.781862	-0.802278	-0.802278	-0.803357	-0.850441	-0.906676	-0.441841	-0.428817	-0.487834	-0.506154	-0.38849	-0.506154	-0.465089	-0.499176	-0.521219	no
chr1	13305902	13318591	PRAMEF33	-0.466791	-0.49963	-0.522959	-0.426062	0	-0.426062	-0.436827	-0.482991	-0.611664	-0.675363	-0.692386	-0.780522	-0.781862	-0.802278	-0.802278	-0.803357	-0.850441	-0.906676	-0.441841	-0.428817	-0.487834	-0.506154	-0.38849	-0.506154	-0.465089	-0.499176	-0.521219	no
chr1	13318361	13341989	PRAMEF15	-0.466791	-0.49963	-0.522959	-0.426062	0	-0.426062	-0.436827	-0.482991	-0.611664	-0.675363	-0.692386	-0.780522	-0.781862	-0.802278	-0.802278	-0.803357	-0.850441	-0.906676	-0.441841	-0.428817	-0.487834	-0.506154	-0.38849	-0.506154	-0.465089	-0.499176	-0.521219	no
chr1	13342489	13368440	PRAMEF14	-0.466791	-0.49963	-0.522959	-0.426062	0	-0.426062	-0.436827	-0.482991	-0.611664	-0.675363	-0.692386	-0.780522	-0.781862	-0.802278	-0.802278	-0.803357	-0.850441	-0.906676	-0.441841	-0.428817	-0.487834	-0.506154	-0.38849	-0.506154	-0.465089	-0.499176	-0.521219	no
chr1	13368940	13389108	PRAMEF19	-0.466791	-0.49963	-0.522959	-0.426062	0	-0.426062	-0.436827	-0.482991	-0.611664	-0.675363	-0.692386	-0.780522	-0.781862	-0.802278	-0.802278	-0.803357	-0.850441	-0.906676	-0.441841	-0.428817	-0.487834	-0.506154	-0.38849	-0.506154	-0.465089	-0.499176	-0.521219	no
chr1	13389608	13415619	PRAMEF17	-0.466791	-0.49963	-0.522959	-0.426062	0	-0.426062	-0.436827	-0.482991	-0.611664	-0.675363	-0.692386	-0.780522	-0.781862	-0.802278	-0.802278	-0.803357	-0.850441	-0.906676	-0.441841	-0.428817	-0.487834	-0.506154	-0.38849	-0.506154	-0.465089	-0.499176	-0.521219	no
chr1	13416119	13475113	PRAMEF20	-0.466791	-0.49963	-0.522959	-0.426062	0	-0.426062	-0.436827	-0.482991	-0.611664	-0.675363	-0.692386	-0.780522	-0.781862	-0.802278	-0.802278	-0.803357	-0.850441	-0.906676	-0.441841	-0.428817	-0.487834	-0.506154	-0.38849	-0.506154	-0.465089	-0.499176	-0.521219	no
chr1	13475613	13583189	LRRC38	-0.466791	-0.49963	-0.522959	-0.426062	0	-0.426062	-0.436827	-0.482991	-0.611664	-0.675363	-0.692386	-0.780522	-0.781862	-0.802278	-0.802278	-0.803357	-0.850441	-0.906676	-0.441841	-0.428817	-0.487834	-0.506154	-0.38849	-0.506154	-0.465089	-0.499176	-0.521219	no
chr1	13583689	13714955	PDPN	-0.466791	-0.49963	-0.522959	-0.426062	0	-0.426062	-0.436827	-0.482991	-0.611664	-0.675363	-0.692386	-0.780522	-0.781862	-0.802278	-0.802278	-0.803357	-0.850441	-0.906676	-0.441841	-0.428817	-0.487834	-0.506154	-0.38849	-0.506154	-0.465089	-0.499176	-0.521219	no
chr1	13715455	13893046	PRDM2	-0.466791	-0.49963	-0.522959	-0.426062	-0.664809	-0.664809	-0.436827	-0.482991	-0.611664	-0.675363	-0.692386	-0.780522	-0.781862	-0.802278	-0.802278	-0.803357	-0.850441	-0.906676	-0.441841	-0.428817	-0.487834	-0.506154	-0.38849	-0.506154	-0.465089	-0.499176	-0.521219	no
chr1	14598844	15163738	KAZN	-0.466791	-0.49963	-0.522959	-0.426062	-0.664809	-0.664809	-0.436827	-0.482991	-0.611664	-0.675363	-0.692386	-0.780522	-0.781862	-0.802278	-0.802278	-0.803357	-0.850441	-0.906676	-0.441841	-0.428817	-0.487834	-0.506154	-0.38849	-0.506154	-0.465089	-0.499176	-0.521219	no
chr1	15164238	15246680	TMEM51	-0.466791	-0.49963	-0.522959	-0.426062	-0.664809	-0.664809	-0.436827	-0.482991	-0.611664	-0.675363	-0.692386	-0.780522	-0.781862	-0.802278	-0.802278	-0.803357	-0.850441	-0.906676	-0.441841	-0.428817	-0.487834	-0.506154	-0.38849	-0.506154	-0.465089	-0.499176	-0.521219	no
chr1	15251659	15409376	FHAD1	-0.466791	-0.49963	-0.522959	-0.426062	-0.664809	-0.664809	-0.436827	-0.482991	-0.611664	-0.675363	-0.692386	-0.780522	-0.781862	-0.802278	-0.802278	-0.803357	-0.850441	-0.906676	-0.441841	-0.428817	-0.487834	-0.506154	-0.38849	-0.506154	-0.465089	-0.499176	-0.521219	no
chr1	15425721	15438631	EFHD2	-0.466791	-0.49963	-0.522959	-0.426062	-0.664809	-0.664809	-0.436827	-0.482991	-0.611664	-0.675363	-0.692386	-0.780522	-0.781862	-0.802278	-0.802278	-0.803357	-0.850441	-0.906676	-0.441841	-0.428817	-0.487834	-0.506154	-0.38849	-0.506154	-0.465089	-0.499176	-0.521219	no
chr1	15438243	15453075	CTRC	-0.466791	-0.49963	-0.522959	-0.426062	-0.664809	-0.664809	-0.436827	-0.482991	-0.611664	-0.675363	-0.692386	-0.780522	-0.781862	-0.802278	-0.802278	-0.803357	-0.850441	-0.906676	-0.441841	-0.428817	-0.487834	-0.506154	-0.38849	-0.506154	-0.465089	-0.499176	-0.521219	no
chr1	15456500	15476202	CELA2A	-0.466791	-0.49963	-0.522959	-0.426062	-0.664809	-0.664809	-0.436827	-0.482991	-0.611664	-0.675363	-0.692386	-0.780522	-0.781862	-0.802278	-0.802278	-0.803357	-0.850441	-0.906676	-0.441841	-0.428817	-0.487834	-0.506154	-0.38849	-0.506154	-0.465089	-0.499176	-0.521219	no
chr1	15475872	15493201	CELA2B	-0.466791	-0.49963	-0.522959	-0.426062	-0.664809	-0.664809	-0.436827	-0.482991	-0.611664	-0.675363	-0.692386	-0.780522	-0.781862	-0.802278	-0.802278	-0.803357	-0.850441	-0.906676	-0.441841	-0.428817	-0.487834	-0.506154	-0.38849	-0.506154	-0.465089	-0.499176	-0.521219	no
chr1	15492824	15529418	CASP9	-0.466791	-0.49963	-0.522959	-0.426062	-0.664809	-0.664809	-0.436827	-0.482991	-0.611664	-0.675363	-0.692386	-0.780522	-0.781862	-0.802278	-0.802278	-0.803357	-0.850441	-0.906676	-0.441841	-0.428817	-0.487834	-0.506154	-0.38849	-0.506154	-0.465089	-0.499176	-0.521219	no
chr1	15529035	15573624	DNAJC16	-0.466791	-0.49963	-0.522959	-0.426062	-0.664809	-0.664809	-0.436827	-0.482991	-0.611664	-0.675363	-0.692386	-0.780522	-0.781862	-0.802278	-0.802278	-0.803357	-0.850441	-0.906676	-0.441841	-0.428817	-0.487834	-0.506154	-0.38849	-0.506154	-0.465089	-0.499176	-0.521219	no
chr1	15573408	15617084	AGMAT	-0.466791	-0.49963	-0.522959	-0.426062	-0.664809	-0.664809	-0.436827	-0.482991	-0.611664	-0.675363	-0.692386	-0.780522	-0.781862	-0.802278	-0.802278	-0.803357	-0.850441	-0.906676	-0.441841	-0.428817	-0.487834	-0.506154	-0.38849	-0.506154	-0.465089	-0.499176	-0.521219	no
chr1	15617791	15661571	DDI2	-0.466791	-0.49963	-0.522959	-0.426062	-0.664809	-0.664809	-0.436827	-0.482991	-0.611664	-0.675363	-0.692386	-0.780522	-0.781862	-0.802278	-0.802278	-0.803357	-0.850441	-0.906676	-0.441841	-0.428817	-0.487834	-0.506154	-0.38849	-0.506154	-0.465089	-0.499176	-0.521219	no
chr1	15661303	15680824	RSC1A1	-0.466791	-0.49963	-0.522959	-0.426062	-0.664809	-0.664809	-0.436827	-0.482991	-0.611664	-0.675363	-0.692386	-0.780522	-0.781862	-0.802278	-0.802278	-0.803357	-0.850441	-0.906676	-0.441841	-0.428817	-0.487834	-0.506154	-0.38849	-0.506154	-0.465089	-0.499176	-0.521219	no
chr1	15715978	15736726	PLEKHM2	-0.466791	-0.49963	-0.522959	-0.426062	-0.664809	-0.664809	-0.436827	-0.482991	-0.611664	-0.675363	-0.692386	-0.780522	-0.781862	-0.802278	-0.802278	-0.803357	-0.850441	-0.906676	-0.441841	-0.428817	-0.487834	-0.506154	-0.38849	-0.506154	-0.465089	-0.499176	-0.521219	no
chr1	15736444	15742662	SLC25A34	-0.466791	-0.49963	-0.522959	-0.426062	-0.664809	-0.664809	-0.436827	-0.482991	-0.611664	-0.675363	-0.692386	-0.780522	-0.781862	-0.802278	-0.802278	-0.803357	-0.850441	-0.906676	-0.441841	-0.428817	-0.487834	-0.506154	-0.38849	-0.506154	-0.465089	-0.499176	-0.521219	no
chr1	15742365	15764402	TMEM82	-0.466791	-0.49963	-0.522959	-0.426062	-0.664809	-0.664809	-0.436827	-0.482991	-0.611664	-0.675363	-0.692386	-0.780522	-0.781862	-0.802278	-0.802278	-0.803357	-0.850441	-0.906676	-0.441841	-0.428817	-0.487834	-0.506154	-0.38849	-0.506154	-0.465089	-0.499176	-0.521219	no
chr1	15764902	15806826	FBLIM1	-0.466791	-0.49963	-0.522959	-0.426062	-0.664809	-0.664809	-0.436827	-0.482991	-0.611664	-0.675363	-0.692386	-0.780522	-0.781862	-0.802278	-0.802278	-0.803357	-0.850441	-0.906676	-0.441841	-0.428817	-0.487834	-0.506154	-0.38849	-0.506154	-0.465089	-0.499176	-0.521219	no
chr1	15807326	15847425	UQCRHL	-0.466791	-0.49963	-0.522959	-0.426062	-0.664809	-0.664809	-0.436827	-0.482991	-0.611664	-0.675363	-0.692386	-0.780522	-0.781862	-0.802278	-0.802278	-0.803357	-0.850441	-0.906676	-0.441841	-0.428817	-0.487834	-0.506154	-0.38849	-0.506154	-0.465089	-0.499176	-0.521219	no
chr1	15872688	15942097	SPEN	-0.466791	-0.49963	-0.522959	-0.426062	-0.664809	-0.664809	-0.436827	-0.482991	-0.611664	-0.675363	-0.692386	-0.780522	-0.781862	-0.802278	-0.802278	-0.803357	-0.850441	-0.906676	-0.441841	-0.428817	-0.487834	-0.506154	-0.38849	-0.506154	-0.465089	-0.499176	-0.521219	no
chr1	15941816	16003630	ZBTB17	-0.466791	-0.49963	-0.522959	-0.426062	-0.664809	-0.664809	-0.436827	-0.482991	-0.611664	-0.675363	-0.692386	-0.780522	-0.781862	-0.802278	-0.802278	-0.803357	-0.850441	-0.906676	-0.441841	-0.428817	-0.487834	-0.506154	-0.38849	-0.506154	-0.465089	-0.499176	-0.521219	no
chr1	16004130	16015535	SRARP	-0.466791	-0.49963	-0.522959	-0.426062	-0.664809	-0.664809	-0.436827	-0.482991	-0.611664	-0.675363	-0.692386	-0.780522	-0.781862	-0.802278	-0.802278	-0.803357	-0.850441	-0.906676	-0.441841	-0.428817	-0.487834	-0.506154	-0.38849	-0.506154	-0.465089	-0.499176	-0.521219	no
chr1	16015233	16022910	HSPB7	-0.466791	-0.49963	-0.522959	-1.0018	-0.664809	-1.0018	-0.436827	-0.482991	-0.611664	-0.675363	-0.692386	-0.780522	-0.781862	-1.45878	-1.45878	-0.803357	-0.850441	-0.906676	-0.441841	-0.428817	-0.487834	-0.506154	-0.38849	-0.506154	-0.465089	-0.499176	-0.521219	no
chr1	16022516	16035644	CLCNKA	-0.466791	-0.49963	-0.522959	-1.3922	-0.664809	-1.3922	-0.436827	-0.482991	-0.611664	-0.675363	-0.692386	-0.780522	-0.781862	-1.89062	-1.89062	-0.803357	-0.850441	-0.906676	-0.441841	-0.428817	-0.487834	-0.506154	-0.38849	-0.506154	-0.465089	-0.499176	-0.521219	no
chr1	16044320	16058865	CLCNKB	-0.466791	-0.49963	-0.522959	-1.17731	-0.664809	-1.17731	-0.436827	-0.482991	-0.611664	-0.675363	-0.692386	-0.780522	-0.781862	-1.52461	-1.52461	-0.803357	-0.850441	-0.906676	-0.441841	-0.428817	-0.487834	-0.506154	-0.38849	-0.506154	-0.465089	-0.499176	-0.521219	no
chr1	16058474	16124507	FAM131C	-0.466791	-0.49963	-0.522959	-0.458824	-0.664809	-0.664809	-0.436827	-0.482991	-0.611664	-0.675363	-0.692386	-0.780522	-0.781862	-0.891447	-0.891447	-0.803357	-0.850441	-0.906676	-0.441841	-0.428817	-0.487834	-0.506154	-0.38849	-0.506154	-0.465089	-0.499176	-0.521219	no
chr1	16125007	16197968	EPHA2	-0.466791	-0.49963	-0.522959	-0.458824	-0.664809	-0.664809	-0.436827	-0.482991	-0.611664	-0.675363	-0.692386	-0.780522	-0.781862	-0.891447	-0.891447	-0.803357	-0.850441	-0.906676	-0.441841	-0.428817	-0.487834	-0.506154	-0.38849	-0.506154	-0.465089	-0.499176	-0.521219	no
chr1	16198468	16216007	ARHGEF19	-0.466791	-0.49963	-0.522959	-0.458824	-0.664809	-0.664809	-0.436827	-0.482991	-0.611664	-0.675363	-0.692386	-0.780522	-0.781862	-0.891447	-0.891447	-0.803357	-0.850441	-0.906676	-0.441841	-0.428817	-0.487834	-0.506154	-0.38849	-0.506154	-0.465089	-0.499176	-0.521219	no
chr1	16231920	16250083	CPLANE2	-0.466791	-0.49963	-0.522959	-0.458824	-0.664809	-0.664809	-0.436827	-0.482991	-0.611664	-0.675363	-0.692386	-0.780522	-0.781862	-0.891447	-0.891447	-0.803357	-0.850441	-0.906676	-0.441841	-0.428817	-0.487834	-0.506154	-0.38849	-0.506154	-0.465089	-0.499176	-0.521219	no
chr1	16250583	16366599	FBXO42	-0.466791	-0.49963	-0.522959	-0.458824	-0.664809	-0.664809	-0.436827	-0.482991	-0.611664	-0.675363	-0.692386	-0.780522	-0.781862	-0.891447	-0.891447	-0.803357	-0.850441	-0.906676	-0.441841	-0.428817	-0.487834	-0.506154	-0.38849	-0.506154	-0.465089	-0.499176	-0.521219	no
chr1	16367099	16399017	SZRD1	-0.466791	-0.49963	-0.522959	-0.458824	-0.664809	-0.664809	-0.436827	-0.482991	-0.611664	-0.675363	-0.692386	-0.780522	-0.781862	-0.891447	-0.891447	-0.803357	-0.850441	-0.906676	-0.441841	-0.428817	-0.487834	-0.506154	-0.38849	-0.506154	-0.465089	-0.499176	-0.521219	no
chr1	16398618	16440999	SPATA21	-0.466791	-0.49963	-0.522959	-0.458824	-0.664809	-0.664809	-0.436827	-0.482991	-0.611664	-0.675363	-0.692386	-0.780522	-0.781862	-0.891447	-0.891447	-0.803357	-0.850441	-0.906676	-0.441841	-0.428817	-0.487834	-0.506154	-0.38849	-0.506154	-0.465089	-0.499176	-0.521219	no
chr1	16440608	16475325	NECAP2	-0.466791	-0.49963	-0.522959	-0.458824	-0.664809	-0.664809	-0.436827	-0.482991	-0.611664	-0.675363	-0.692386	-0.780522	-0.781862	-0.891447	-0.891447	-0.803357	-0.850441	-0.906676	-0.441841	-0.428817	-0.487834	-0.506154	-0.38849	-0.506154	-0.465089	-0.499176	-0.521219	no
chr1	16475825	16535272	CROCCP3	-0.466791	-0.49963	-0.522959	-0.458824	-0.664809	-0.664809	-0.436827	-0.482991	-0.611664	-0.675363	-0.692386	-0.780522	-0.781862	-0.891447	-0.891447	-0.803357	-0.850441	-0.906676	-0.441841	-0.428817	-0.487834	-0.506154	-0.38849	-0.506154	-0.465089	-0.499176	-0.521219	no
chr1	16563852	16623262	NBPF1	-0.466791	-0.49963	-0.522959	0.546289	0.479879	0.546289	-0.436827	-0.482991	-0.611664	0.81604	0.719722	0.793799	0.691852	0.632376	0.691852	0.609278	0.538624	0.409962	0.986476	-0.428817	0.974538	1.01917	-0.38849	1.01917	0.95724	0.942936	1.07655	no
chr1	16623762	16642366	CROCCP2	-0.466791	-0.49963	-0.522959	0.546289	0.479879	0.546289	-0.436827	-0.482991	-0.611664	0.81604	0.719722	0.793799	0.691852	0.632376	0.691852	0.609278	0.538624	0.409962	0.986476	-0.428817	0.974538	1.01917	-0.38849	1.01917	0.95724	0.942936	1.07655	no
chr1	16645386	16672285	MST1P2	-0.466791	-0.49963	-0.522959	0.546289	0.479879	0.546289	-0.436827	-0.482991	-0.611664	0.81604	0.719722	0.793799	0.691852	0.632376	0.691852	0.609278	0.538624	0.409962	0.986476	-0.428817	0.974538	1.01917	-0.38849	1.01917	0.95724	0.942936	1.07655	no
chr1	16672785	16756631	FAM231C	-0.466791	-0.49963	-0.522959	0.546289	0.479879	0.546289	-0.436827	-0.482991	-0.611664	0.81604	0.719722	0.203175	0.691852	0.632376	0.691852	-0.168618	0.538624	0.409962	0.986476	-0.428817	0.974538	1.01917	-0.38849	1.01917	0.95724	0.942936	1.07655	no
chr1	16690986	16733218	ESPNP	-0.466791	-0.49963	-0.522959	0.546289	0.479879	0.546289	-0.436827	-0.482991	-0.611664	0.81604	0.719722	-0.387449	0.691852	0.632376	0.691852	-0.240174	0.538624	0.409962	0.986476	-0.428817	0.974538	1.01917	-0.38849	1.01917	0.95724	0.942936	1.07655	no
chr1	16757131	16764707	MST1L	-0.466791	-0.49963	-0.522959	0.546289	0.479879	0.546289	-0.436827	-0.482991	-0.611664	0.81604	0.719722	-0.387449	0.691852	0.632376	0.691852	-0.240174	0.538624	0.409962	0.986476	-0.428817	0.974538	1.01917	-0.38849	1.01917	0.95724	0.942936	1.07655	no
chr1	16921877	16975183	CROCC	-0.466791	-0.49963	-0.522959	-1.40647	-1.48657	-1.48657	-0.436827	-0.482991	-0.611664	-1.79236	-1.74286	-1.9566	-2.17046	-2.05698	-2.17046	-1.92835	-1.94544	-2.17281	-1.15016	-0.428817	-0.383096	-1.28003	-0.38849	-1.28003	-1.36488	-1.36193	-0.413612	no
chr1	16974913	16986130	MFAP2	-0.466791	-0.49963	-0.522959	-0.341325	-0.408571	-0.408571	-0.436827	-0.482991	-0.611664	-0.673609	-0.727764	-0.785454	-0.809842	-0.809886	-0.809886	-0.860346	-0.895506	-0.961089	-0.357853	-0.428817	-0.383096	-0.500482	-0.38849	-0.500482	-0.352271	-0.38903	-0.413612	no
chr1	16985853	17018970	ATP13A2	-0.466791	-0.49963	-0.522959	-0.341325	-0.408571	-0.408571	-0.436827	-0.482991	-0.611664	-0.673609	-0.727764	-0.785454	-0.809842	-0.809886	-0.809886	-0.860346	-0.895506	-0.961089	-0.357853	-0.428817	-0.383096	-0.500482	-0.38849	-0.500482	-0.352271	-0.38903	-0.413612	no
chr1	17018740	17068442	SDHB	-0.466791	-0.49963	-0.522959	-0.341325	-0.408571	-0.408571	-0.436827	-0.482991	-0.611664	-0.673609	-0.727764	-0.785454	-0.809842	-0.809886	-0.809886	-0.860346	-0.895506	-0.961089	-0.357853	-0.428817	-0.383096	-0.500482	-0.38849	-0.500482	-0.352271	-0.38903	-0.413612	no
chr1	17068942	17204438	PADI2	-0.466791	-0.49963	-0.522959	-0.341325	-0.408571	-0.408571	-0.436827	-0.482991	-0.611664	-0.673609	-0.727764	-0.785454	-0.809842	-0.809886	-0.809886	-0.860346	-0.895506	-0.961089	-0.357853	-0.428817	-0.383096	-0.500482	-0.38849	-0.500482	-0.352271	-0.38903	-0.413612	no
chr1	17204938	17249195	PADI1	-0.466791	-0.49963	-0.522959	-0.341325	-0.408571	-0.408571	-0.436827	-0.482991	-0.611664	-0.673609	-0.727764	-0.785454	-0.809842	-0.809886	-0.809886	-0.860346	-0.895506	-0.961089	-0.357853	-0.428817	-0.383096	-0.500482	-0.38849	-0.500482	-0.352271	-0.38903	-0.413612	no
chr1	17248964	17307621	PADI3	-0.466791	-0.49963	-0.522959	-0.341325	-0.408571	-0.408571	-0.436827	-0.482991	-0.611664	-0.673609	-0.727764	-0.785454	-0.809842	-0.809886	-0.809886	-0.860346	-0.895506	-0.961089	-0.357853	-0.428817	-0.383096	-0.500482	-0.38849	-0.500482	-0.352271	-0.38903	-0.413612	no
chr1	17308121	17372389	PADI4	-0.466791	-0.49963	-0.522959	-0.341325	-0.408571	-0.408571	-0.436827	-0.482991	-0.611664	-0.673609	-0.727764	-0.785454	-0.809842	-0.809886	-0.809886	-0.860346	-0.895506	-0.961089	-0.357853	-0.428817	-0.383096	-0.500482	-0.38849	-0.500482	-0.352271	-0.38903	-0.413612	no
chr1	17372138	17409381	PADI6	-0.466791	-0.49963	-0.522959	-0.341325	-0.408571	-0.408571	-0.436827	-0.482991	-0.611664	-0.673609	-0.727764	-0.785454	-0.809842	-0.809886	-0.809886	-0.860346	-0.895506	-0.961089	-0.357853	-0.428817	-0.383096	-0.500482	-0.38849	-0.500482	-0.352271	-0.38903	-0.413612	no
chr1	17409060	17579971	RCC2	-0.466791	-0.49963	-0.522959	-0.341325	-0.408571	-0.408571	-0.436827	-0.482991	-0.611664	-0.673609	-0.727764	-0.785454	-0.809842	-0.809886	-0.809886	-0.860346	-0.895506	-0.961089	-0.357853	-0.428817	-0.383096	-0.500482	-0.38849	-0.500482	-0.352271	-0.38903	-0.413612	no
chr1	17580471	17822412	ARHGEF10L	-0.466791	-0.49963	-0.522959	-0.341325	-0.408571	-0.408571	-0.436827	-0.482991	-0.611664	-0.673609	-0.727764	-0.785454	-0.809842	-0.809886	-0.809886	-0.860346	-0.895506	-0.961089	-0.357853	-0.428817	-0.383096	-0.500482	-0.38849	-0.500482	-0.352271	-0.38903	-0.413612	no
chr1	17822912	17967356	ACTL8	-0.466791	-0.49963	-0.522959	-0.341325	-0.408571	-0.408571	-0.436827	-0.482991	-0.611664	-0.673609	-0.727764	-0.785454	-0.809842	-0.809886	-0.809886	-0.860346	-0.895506	-0.961089	-0.357853	-0.428817	-0.383096	-0.500482	-0.38849	-0.500482	-0.352271	-0.38903	-0.413612	no
chr1	18108265	18480267	IGSF21	-0.466791	-0.49963	-0.522959	-0.341325	-0.408571	-0.408571	-0.436827	-0.482991	-0.611664	-0.673609	-0.727764	-0.785454	-0.809842	-0.809886	-0.809886	-0.860346	-0.895506	-0.961089	-0.357853	-0.428817	-0.383096	-0.500482	-0.38849	-0.500482	-0.352271	-0.38903	-0.413612	no
chr1	18480767	18630885	KLHDC7A	-0.466791	-0.49963	-0.522959	-0.341325	-0.408571	-0.408571	-0.436827	-0.482991	-0.611664	-0.673609	-0.727764	-0.785454	-0.809842	-0.809886	-0.809886	-0.860346	-0.895506	-0.961089	-0.357853	-0.428817	-0.383096	-0.500482	-0.38849	-0.500482	-0.352271	-0.38903	-0.413612	no
chr1	18631385	18838807	PAX7	-0.466791	-0.49963	-0.522959	-0.341325	-0.408571	-0.408571	-0.436827	-0.482991	-0.611664	-0.673609	-0.727764	-0.785454	-0.809842	-0.809886	-0.809886	-0.860346	-0.895506	-0.961089	-0.357853	-0.428817	-0.383096	-0.500482	-0.38849	-0.500482	-0.352271	-0.38903	-0.413612	yes
chr1	18839566	18860016	TAS1R2	-0.466791	-0.49963	-0.522959	-0.341325	-0.408571	-0.408571	-0.436827	-0.482991	-0.611664	-0.673609	-0.727764	-0.785454	-0.809842	-0.809886	-0.809886	-0.860346	-0.895506	-0.961089	-0.357853	-0.428817	-0.383096	-0.500482	-0.38849	-0.500482	-0.352271	-0.38903	-0.413612	no
chr1	18872758	18908700	ALDH4A1	-0.466791	-0.49963	-0.522959	-0.341325	-0.408571	-0.408571	-0.436827	-0.482991	-0.611664	-0.673609	-0.727764	-0.785454	-0.809842	-0.809886	-0.809886	-0.860346	-0.895506	-0.961089	-0.357853	-0.428817	-0.383096	-0.500482	-0.38849	-0.500482	-0.352271	-0.38903	-0.413612	no
chr1	18908464	18955102	IFFO2	-0.466791	-0.49963	-0.522959	-0.341325	-0.408571	-0.408571	-0.436827	-0.482991	-0.611664	-0.673609	-0.727764	-0.785454	-0.809842	-0.809886	-0.809886	-0.860346	-0.895506	-0.961089	-0.357853	-0.428817	-0.383096	-0.500482	-0.38849	-0.500482	-0.352271	-0.38903	-0.413612	no
chr1	19074720	19219512	UBR4	-0.466791	-0.49963	-0.522959	-0.341325	-0.408571	-0.408571	-0.436827	-0.482991	-0.611664	-0.673609	-0.727764	-0.785454	-0.809842	-0.809886	-0.809886	-0.860346	-0.895506	-0.961089	-0.357853	-0.428817	-0.383096	-0.500482	-0.38849	-0.500482	-0.352271	-0.38903	-0.413612	no
chr1	19219190	19254785	EMC1	-0.466791	-0.49963	-0.522959	-0.341325	-0.408571	-0.408571	-0.436827	-0.482991	-0.611664	-0.673609	-0.727764	-0.785454	-0.809842	-0.809886	-0.809886	-0.860346	-0.895506	-0.961089	-0.357853	-0.428817	-0.383096	-0.500482	-0.38849	-0.500482	-0.352271	-0.38903	-0.413612	no
chr1	19254535	19267414	MRTO4	-0.466791	-0.49963	-0.522959	-0.341325	-0.408571	-0.408571	-0.436827	-0.482991	-0.611664	-0.673609	-0.727764	-0.785454	-0.809842	-0.809886	-0.809886	-0.860346	-0.895506	-0.961089	-0.357853	-0.428817	-0.383096	-0.500482	-0.38849	-0.500482	-0.352271	-0.38903	-0.413612	no
chr1	19267107	19282865	AKR7L	-0.466791	-0.49963	-0.522959	-0.341325	-0.408571	-0.408571	-0.436827	-0.482991	-0.611664	-0.673609	-0.727764	-0.785454	-0.809842	-0.809886	-0.809886	-0.860346	-0.895506	-0.961089	-0.357853	-0.428817	-0.383096	-0.500482	-0.38849	-0.500482	-0.352271	-0.38903	-0.413612	no
chr1	19282578	19303572	AKR7A3	-0.466791	-0.49963	-0.522959	-0.341325	-0.408571	-0.408571	-0.436827	-0.482991	-0.611664	-0.673609	-0.727764	-0.785454	-0.809842	-0.809886	-0.809886	-0.860346	-0.895506	-0.961089	-0.357853	-0.428817	-0.383096	-0.500482	-0.38849	-0.500482	-0.352271	-0.38903	-0.413612	no
chr1	19304072	19317683	AKR7A2	-0.466791	-0.49963	-0.522959	-0.341325	-0.408571	-0.408571	-0.436827	-0.482991	-0.611664	-0.673609	-0.727764	-0.785454	-0.809842	-0.809886	-0.809886	-0.860346	-0.895506	-0.961089	-0.357853	-0.428817	-0.383096	-0.500482	-0.38849	-0.500482	-0.352271	-0.38903	-0.413612	no
chr1	19317410	19338870	PQLC2	-0.466791	-0.49963	-0.522959	-0.341325	-0.408571	-0.408571	-0.436827	-0.482991	-0.611664	-0.673609	-0.727764	-0.785454	-0.809842	-0.809886	-0.809886	-0.860346	-0.895506	-0.961089	-0.357853	-0.428817	-0.383096	-0.500482	-0.38849	-0.500482	-0.352271	-0.38903	-0.413612	no
chr1	19339370	19596210	CAPZB	-0.466791	-0.49963	-0.522959	-0.341325	-0.408571	-0.408571	-0.436827	-0.482991	-0.611664	-0.673609	-0.727764	-0.785454	-0.809842	-0.809886	-0.809886	-0.860346	-0.895506	-0.961089	-0.357853	-0.428817	-0.383096	-0.500482	-0.38849	-0.500482	-0.352271	-0.38903	-0.413612	no
chr1	19596710	19597234	LOC105378614	-0.466791	-0.49963	-0.522959	-0.341325	-0.408571	-0.408571	-0.436827	-0.482991	-0.611664	-0.673609	-0.727764	-0.785454	-0.809842	-0.809886	-0.809886	-0.860346	-0.895506	-0.961089	-0.357853	-0.428817	-0.383096	-0.500482	-0.38849	-0.500482	-0.352271	-0.38903	-0.413612	no
chr1	19596972	19665713	MINOS1-NBL1	-0.466791	-0.49963	-0.522959	-0.341325	-0.408571	-0.408571	-0.436827	-0.482991	-0.611664	-0.673609	-0.727764	-0.785454	-0.809842	-0.809886	-0.809886	-0.860346	-0.895506	-0.961089	-0.357853	-0.428817	-0.383096	-0.500482	-0.38849	-0.500482	-0.352271	-0.38903	-0.413612	no
chr1	19665441	19682783	HTR6	-0.466791	-0.49963	-0.522959	-0.341325	-0.408571	-0.408571	-0.436827	-0.482991	-0.611664	-0.673609	-0.727764	-0.785454	-0.809842	-0.809886	-0.809886	-0.860346	-0.895506	-0.961089	-0.357853	-0.428817	-0.383096	-0.500482	-0.38849	-0.500482	-0.352271	-0.38903	-0.413612	no
chr1	19682528	19813561	TMCO4	-0.466791	-0.49963	-0.522959	-0.341325	-0.408571	-0.408571	-0.436827	-0.482991	-0.611664	-0.673609	-0.727764	-0.785454	-0.809842	-0.809886	-0.809886	-0.860346	-0.895506	-0.961089	-0.357853	-0.428817	-0.383096	-0.500482	-0.38849	-0.500482	-0.352271	-0.38903	-0.413612	no
chr1	19814061	19881818	RNF186	-0.466791	-0.49963	-0.522959	-0.341325	-0.408571	-0.408571	-0.436827	-0.482991	-0.611664	-0.673609	-0.727764	-0.785454	-0.809842	-0.809886	-0.809886	-0.860346	-0.895506	-0.961089	-0.357853	-0.428817	-0.383096	-0.500482	-0.38849	-0.500482	-0.352271	-0.38903	-0.413612	no
chr1	19890241	19919727	OTUD3	-0.466791	-0.49963	-0.522959	-0.341325	-0.408571	-0.408571	-0.436827	-0.482991	-0.611664	-0.673609	-0.727764	-0.785454	-0.809842	-0.809886	-0.809886	-0.860346	-0.895506	-0.961089	-0.357853	-0.428817	-0.383096	-0.500482	-0.38849	-0.500482	-0.352271	-0.38903	-0.413612	no
chr1	19920227	19923846	PLA2G2E	-0.466791	-0.49963	-0.522959	-0.341325	-0.408571	-0.408571	-0.436827	-0.482991	-0.611664	-0.673609	-0.727764	-0.785454	-0.809842	-0.809886	-0.809886	-0.860346	-0.895506	-0.961089	-0.357853	-0.428817	-0.383096	-0.500482	-0.38849	-0.500482	-0.352271	-0.38903	-0.413612	no
chr1	19975616	20068335	PLA2G2A	-0.466791	-0.49963	-0.522959	-0.341325	-0.408571	-0.408571	-0.436827	-0.482991	-0.611664	-0.673609	-0.727764	-0.785454	-0.809842	-0.809886	-0.809886	-0.860346	-0.895506	-0.961089	-0.357853	-0.428817	-0.383096	-0.500482	-0.38849	-0.500482	-0.352271	-0.38903	-0.413612	no
chr1	20084687	20113538	PLA2G5	-0.466791	-0.49963	-0.522959	-0.341325	-0.408571	-0.408571	-0.436827	-0.482991	-0.611664	-0.673609	-0.727764	-0.785454	-0.809842	-0.809886	-0.809886	-0.860346	-0.895506	-0.961089	-0.357853	-0.428817	-0.383096	-0.500482	-0.38849	-0.500482	-0.352271	-0.38903	-0.413612	no
chr1	20114038	20119804	PLA2G2D	-0.466791	-0.49963	-0.522959	-0.341325	-0.408571	-0.408571	-0.436827	-0.482991	-0.611664	-0.673609	-0.727764	-0.785454	-0.809842	-0.809886	-0.809886	-0.860346	-0.895506	-0.961089	-0.357853	-0.428817	-0.383096	-0.500482	-0.38849	-0.500482	-0.352271	-0.38903	-0.413612	no
chr1	20139278	20163337	PLA2G2F	-0.466791	-0.49963	-0.522959	-0.341325	-0.408571	-0.408571	-0.436827	-0.482991	-0.611664	-0.673609	-0.727764	-0.785454	-0.809842	-0.809886	-0.809886	-0.860346	-0.895506	-0.961089	-0.357853	-0.428817	-0.383096	-0.500482	-0.38849	-0.500482	-0.352271	-0.38903	-0.413612	no
chr1	20163837	20177651	PLA2G2C	-0.466791	-0.49963	-0.522959	-0.341325	-0.408571	-0.408571	-0.436827	-0.482991	-0.611664	-0.673609	-0.727764	-0.785454	-0.809842	-0.809886	-0.809886	-0.860346	-0.895506	-0.961089	-0.357853	-0.428817	-0.383096	-0.500482	-0.38849	-0.500482	-0.352271	-0.38903	-0.413612	no
chr1	20190454	20310009	UBXN10	-0.466791	-0.49963	-0.522959	-0.341325	-0.408571	-0.408571	-0.436827	-0.482991	-0.611664	-0.673609	-0.727764	-0.785454	-0.809842	-0.809886	-0.809886	-0.860346	-0.895506	-0.961089	-0.357853	-0.428817	-0.383096	-0.500482	-0.38849	-0.500482	-0.352271	-0.38903	-0.413612	no
chr1	20310509	20482955	VWA5B1	-0.466791	-0.49963	-0.522959	-0.341325	-0.408571	-0.408571	-0.436827	-0.482991	-0.611664	-0.673609	-0.727764	-0.785454	-0.809842	-0.809886	-0.809886	-0.860346	-0.895506	-0.961089	-0.357853	-0.428817	-0.383096	-0.500482	-0.38849	-0.500482	-0.352271	-0.38903	-0.413612	no
chr1	20483455	20499950	CAMK2N1	-0.466791	-0.49963	-0.522959	-0.341325	-0.408571	-0.408571	-0.436827	-0.482991	-0.611664	-0.673609	-0.727764	-0.785454	-0.809842	-0.809886	-0.809886	-0.860346	-0.895506	-0.961089	-0.357853	-0.428817	-0.383096	-0.500482	-0.38849	-0.500482	-0.352271	-0.38903	-0.413612	no
chr1	20500450	20552372	MUL1	-0.466791	-0.49963	-0.522959	-0.341325	-0.408571	-0.408571	-0.436827	-0.482991	-0.611664	-0.673609	-0.727764	-0.785454	-0.809842	-0.809886	-0.809886	-0.860346	-0.895506	-0.961089	-0.357853	-0.428817	-0.383096	-0.500482	-0.38849	-0.500482	-0.352271	-0.38903	-0.413612	no
chr1	20589021	20632974	CDA	-0.466791	-0.49963	-0.522959	-0.341325	-0.408571	-0.408571	-0.436827	-0.482991	-0.611664	-0.673609	-0.727764	-0.785454	-0.809842	-0.809886	-0.809886	-0.860346	-0.895506	-0.961089	-0.357853	-0.428817	-0.383096	-0.500482	-0.38849	-0.500482	-0.352271	-0.38903	-0.413612	no
chr1	20633785	20652351	PINK1	-0.466791	-0.49963	-0.522959	-0.341325	-0.408571	-0.408571	-0.436827	-0.482991	-0.611664	-0.673609	-0.727764	-0.785454	-0.809842	-0.809886	-0.809886	-0.860346	-0.895506	-0.961089	-0.357853	-0.428817	-0.383096	-0.500482	-0.38849	-0.500482	-0.352271	-0.38903	-0.413612	no
chr1	20652104	20664821	DDOST	-0.466791	-0.49963	-0.522959	-0.341325	-0.408571	-0.408571	-0.436827	-0.482991	-0.611664	-0.673609	-0.727764	-0.785454	-0.809842	-0.809886	-0.809886	-0.860346	-0.895506	-0.961089	-0.357853	-0.428817	-0.383096	-0.500482	-0.38849	-0.500482	-0.352271	-0.38903	-0.413612	no
chr1	20664426	20722027	KIF17	-0.466791	-0.49963	-0.522959	-0.341325	-0.408571	-0.408571	-0.436827	-0.482991	-0.611664	-0.673609	-0.727764	-0.785454	-0.809842	-0.809886	-0.809886	-0.860346	-0.895506	-0.961089	-0.357853	-0.428817	-0.383096	-0.500482	-0.38849	-0.500482	-0.352271	-0.38903	-0.413612	no
chr1	20721742	20744127	SH2D5	-0.466791	-0.49963	-0.522959	-0.341325	-0.408571	-0.408571	-0.436827	-0.482991	-0.611664	-0.673609	-0.727764	-0.785454	-0.809842	-0.809886	-0.809886	-0.860346	-0.895506	-0.961089	-0.357853	-0.428817	-0.383096	-0.500482	-0.38849	-0.500482	-0.352271	-0.38903	-0.413612	no
chr1	20744627	20806676	HP1BP3	-0.466791	-0.49963	-0.522959	-0.341325	-0.408571	-0.408571	-0.436827	-0.482991	-0.611664	-0.673609	-0.727764	-0.785454	-0.809842	-0.809886	-0.809886	-0.860346	-0.895506	-0.961089	-0.357853	-0.428817	-0.383096	-0.500482	-0.38849	-0.500482	-0.352271	-0.38903	-0.413612	no
chr1	20807176	21219332	EIF4G3	-0.466791	-0.49963	-0.522959	-0.341325	-0.408571	-0.408571	-0.436827	-0.482991	-0.611664	-0.673609	-0.727764	-0.785454	-0.809842	-0.809886	-0.809886	-0.860346	-0.895506	-0.961089	-0.357853	-0.428817	-0.383096	-0.500482	-0.38849	-0.500482	-0.352271	-0.38903	-0.413612	no
chr1	21219832	21344714	ECE1	-0.466791	-0.49963	-0.522959	-0.341325	-0.408571	-0.408571	-0.436827	-0.482991	-0.611664	-0.673609	-0.727764	-0.785454	-0.809842	-0.809886	-0.809886	-0.860346	-0.895506	-0.961089	-0.357853	-0.428817	-0.383096	-0.500482	-0.38849	-0.500482	-0.352271	-0.38903	-0.413612	no
chr1	21468673	21553456	NBPF3	-0.466791	-0.49963	-0.522959	-0.341325	-0.408571	-0.408571	-0.436827	-0.482991	-0.611664	-0.673609	-0.727764	-0.785454	-0.809842	-0.809886	-0.809886	-0.860346	-0.895506	-0.961089	-0.357853	-0.428817	-0.383096	-0.500482	-0.38849	-0.500482	-0.352271	-0.38903	-0.413612	no
chr1	21553956	21596964	ALPL	-0.466791	-0.49963	-0.522959	-0.341325	-0.408571	-0.408571	-0.436827	-0.482991	-0.611664	-0.673609	-0.727764	-0.785454	-0.809842	-0.809886	-0.809886	-0.860346	-0.895506	-0.961089	-0.357853	-0.428817	-0.383096	-0.500482	-0.38849	-0.500482	-0.352271	-0.38903	-0.413612	no
chr1	21597464	21679309	RAP1GAP	-0.466791	-0.49963	-0.522959	-0.341325	-0.408571	-0.408571	-0.436827	-0.482991	-0.611664	-0.673609	-0.727764	-0.785454	-0.809842	-0.809886	-0.809886	-0.860346	-0.895506	-0.961089	-0.357853	-0.428817	-0.383096	-0.500482	-0.38849	-0.500482	-0.352271	-0.38903	-0.413612	no
chr1	21679048	21811827	USP48	-0.466791	-0.49963	-0.522959	-0.341325	-0.408571	-0.408571	-0.436827	-0.482991	-0.611664	-0.673609	-0.727764	-0.785454	-0.809842	-0.809886	-0.809886	-0.860346	-0.895506	-0.961089	-0.357853	-0.428817	-0.383096	-0.500482	-0.38849	-0.500482	-0.352271	-0.38903	-0.413612	no
chr1	21812327	21827867	LDLRAD2	-0.466791	-0.49963	-0.522959	-0.341325	-0.408571	-0.408571	-0.436827	-0.482991	-0.611664	-0.673609	-0.727764	-0.785454	-0.809842	-0.809886	-0.809886	-0.860346	-0.895506	-0.961089	-0.357853	-0.428817	-0.383096	-0.500482	-0.38849	-0.500482	-0.352271	-0.38903	-0.413612	no
chr1	21827613	21972582	HSPG2	-0.466791	-0.49963	-0.522959	-0.341325	-0.408571	-0.408571	-0.436827	-0.482991	-0.611664	-0.673609	-0.727764	-0.785454	-0.809842	-0.809886	-0.809886	-0.860346	-0.895506	-0.961089	-0.357853	-0.428817	-0.383096	-0.500482	-0.38849	-0.500482	-0.352271	-0.38903	-0.413612	no
chr1	21976823	21998370	CELA3B	-0.466791	-0.49963	-0.522959	-0.341325	-0.408571	-0.408571	-0.436827	-0.482991	-0.611664	-0.673609	-0.727764	-0.785454	-0.809842	-0.809886	-0.809886	-0.860346	-0.895506	-0.961089	-0.357853	-0.428817	-0.383096	-0.500482	-0.38849	-0.500482	-0.352271	-0.38903	-0.413612	no
chr1	22001459	22077976	CELA3A	-0.466791	-0.49963	-0.522959	-0.341325	-0.408571	-0.408571	-0.436827	-0.482991	-0.611664	-0.673609	-0.727764	-0.785454	-0.809842	-0.809886	-0.809886	-0.860346	-0.895506	-0.961089	-0.357853	-0.428817	-0.383096	-0.500482	-0.38849	-0.500482	-0.352271	-0.38903	-0.413612	no
chr1	22078476	22119504	CDC42	-0.466791	-0.49963	-0.522959	-0.341325	-0.408571	-0.408571	-0.436827	-0.482991	-0.611664	-0.673609	-0.727764	-0.785454	-0.809842	-0.809886	-0.809886	-0.860346	-0.895506	-0.961089	-0.357853	-0.428817	-0.383096	-0.500482	-0.38849	-0.500482	-0.352271	-0.38903	-0.413612	no
chr1	22120004	22142211	WNT4	-0.466791	-0.49963	-0.522959	-0.341325	-0.408571	-0.408571	-0.436827	-0.482991	-0.611664	-0.673609	-0.727764	-0.785454	-0.809842	-0.809886	-0.809886	-0.860346	-0.895506	-0.961089	-0.357853	-0.428817	-0.383096	-0.500482	-0.38849	-0.500482	-0.352271	-0.38903	-0.413612	no
chr1	22266086	22489226	MIR4418	-0.466791	-0.49963	-0.522959	-0.341325	-0.408571	-0.408571	-0.436827	-0.482991	-0.611664	-0.673609	-0.727764	-0.785454	-0.809842	-0.809886	-0.809886	-0.860346	-0.895506	-0.961089	-0.357853	-0.428817	-0.383096	-0.500482	-0.38849	-0.500482	-0.352271	-0.38903	-0.413612	no
chr1	22489726	22563124	ZBTB40	-0.466791	-0.49963	-0.522959	-0.341325	-0.408571	-0.408571	-0.436827	-0.482991	-0.611664	-0.673609	-0.727764	-0.785454	-0.809842	-0.809886	-0.809886	-0.860346	-0.895506	-0.961089	-0.357853	-0.428817	-0.383096	-0.500482	-0.38849	-0.500482	-0.352271	-0.38903	-0.413612	no
chr1	22569143	22632669	EPHA8	-0.466791	-0.49963	-0.522959	-0.341325	-0.408571	-0.408571	-0.436827	-0.482991	-0.611664	-0.673609	-0.727764	-0.785454	-0.809842	-0.809886	-0.809886	-0.860346	-0.895506	-0.961089	-0.357853	-0.428817	-0.383096	-0.500482	-0.38849	-0.500482	-0.352271	-0.38903	-0.413612	no
chr1	22633169	22637840	MIR6127	-0.466791	-0.49963	-0.522959	-0.341325	-0.408571	-0.408571	-0.436827	-0.482991	-0.611664	-0.673609	-0.727764	-0.785454	-0.809842	-0.809886	-0.809886	-0.860346	-0.895506	-0.961089	-0.357853	-0.428817	-0.383096	-0.500482	-0.38849	-0.500482	-0.352271	-0.38903	-0.413612	no
chr1	22637461	22644055	C1QA	-0.466791	-0.49963	-0.522959	-0.341325	-0.408571	-0.408571	-0.436827	-0.482991	-0.611664	-0.673609	-0.727764	-0.785454	-0.809842	-0.809886	-0.809886	-0.860346	-0.895506	-0.961089	-0.357853	-0.428817	-0.383096	-0.500482	-0.38849	-0.500482	-0.352271	-0.38903	-0.413612	no
chr1	22643801	22658766	C1QC	-0.466791	-0.49963	-0.522959	-0.341325	-0.408571	-0.408571	-0.436827	-0.482991	-0.611664	-0.673609	-0.727764	-0.785454	-0.809842	-0.809886	-0.809886	-0.860346	-0.895506	-0.961089	-0.357853	-0.428817	-0.383096	-0.500482	-0.38849	-0.500482	-0.352271	-0.38903	-0.413612	no
chr1	22659266	22710355	C1QB	-0.466791	-0.49963	-0.522959	-0.341325	-0.408571	-0.408571	-0.436827	-0.482991	-0.611664	-0.673609	-0.727764	-0.785454	-0.809842	-0.809886	-0.809886	-0.860346	-0.895506	-0.961089	-0.357853	-0.428817	-0.383096	-0.500482	-0.38849	-0.500482	-0.352271	-0.38903	-0.413612	no
chr1	22719262	22952442	EPHB2	-0.466791	-0.49963	-0.522959	-0.341325	-0.408571	-0.408571	-0.436827	-0.482991	-0.611664	-0.673609	-0.727764	-0.785454	-0.809842	-0.809886	-0.809886	-0.860346	-0.895506	-0.961089	-0.357853	-0.428817	-0.383096	-0.500482	-0.38849	-0.500482	-0.352271	-0.38903	-0.413612	no
chr1	22952942	23010332	LACTBL1	-0.466791	-0.49963	-0.522959	-0.341325	-0.408571	-0.408571	-0.436827	-0.482991	-0.611664	-0.673609	-0.727764	-0.785454	-0.809842	-0.809886	-0.809886	-0.860346	-0.895506	-0.961089	-0.357853	-0.428817	-0.383096	-0.500482	-0.38849	-0.500482	-0.352271	-0.38903	-0.413612	no
chr1	23010832	23020075	TEX46	-0.466791	-0.49963	-0.522959	-0.341325	-0.408571	-0.408571	-0.436827	-0.482991	-0.611664	-0.673609	-0.727764	-0.785454	-0.809842	-0.809886	-0.809886	-0.860346	-0.895506	-0.961089	-0.357853	-0.428817	-0.383096	-0.500482	-0.38849	-0.500482	-0.352271	-0.38903	-0.413612	no
chr1	23019850	23089201	KDM1A	-0.466791	-0.49963	-0.522959	-0.341325	-0.408571	-0.408571	-0.436827	-0.482991	-0.611664	-0.673609	-0.727764	-0.785454	-0.809842	-0.809886	-0.809886	-0.860346	-0.895506	-0.961089	-0.357853	-0.428817	-0.383096	-0.500482	-0.38849	-0.500482	-0.352271	-0.38903	-0.413612	no
chr1	23088827	23192433	LUZP1	-0.466791	-0.49963	-0.522959	-0.341325	-0.408571	-0.408571	-0.436827	-0.482991	-0.611664	-0.673609	-0.727764	-0.785454	-0.809842	-0.809886	-0.809886	-0.860346	-0.895506	-0.961089	-0.357853	-0.428817	-0.383096	-0.500482	-0.38849	-0.500482	-0.352271	-0.38903	-0.413612	no
chr1	23192933	23309905	HTR1D	-0.466791	-0.49963	-0.522959	-0.341325	-0.408571	-0.408571	-0.436827	-0.482991	-0.611664	-0.673609	-0.727764	-0.785454	-0.809842	-0.809886	-0.809886	-0.860346	-0.895506	-0.961089	-0.357853	-0.428817	-0.383096	-0.500482	-0.38849	-0.500482	-0.352271	-0.38903	-0.413612	no
chr1	23310405	23361299	HNRNPR	-0.466791	-0.49963	-0.522959	-0.341325	-0.408571	-0.408571	-0.436827	-0.482991	-0.611664	-0.673609	-0.727764	-0.785454	-0.809842	-0.809886	-0.809886	-0.860346	-0.895506	-0.961089	-0.357853	-0.428817	-0.383096	-0.500482	-0.38849	-0.500482	-0.352271	-0.38903	-0.413612	no
chr1	23361799	23371124	ZNF436	-0.466791	-0.49963	-0.522959	-0.341325	-0.408571	-0.408571	-0.436827	-0.482991	-0.611664	-0.673609	-0.727764	-0.785454	-0.809842	-0.809886	-0.809886	-0.860346	-0.895506	-0.961089	-0.357853	-0.428817	-0.383096	-0.500482	-0.38849	-0.500482	-0.352271	-0.38903	-0.413612	no
chr1	23370844	23380651	ZNF436-AS1	-0.466791	-0.49963	-0.522959	-0.341325	-0.408571	-0.408571	-0.436827	-0.482991	-0.611664	-0.673609	-0.727764	-0.785454	-0.809842	-0.809886	-0.809886	-0.860346	-0.895506	-0.961089	-0.357853	-0.428817	-0.383096	-0.500482	-0.38849	-0.500482	-0.352271	-0.38903	-0.413612	no
chr1	23381244	23428918	TCEA3	-0.466791	-0.49963	-0.522959	-0.341325	-0.408571	-0.408571	-0.436827	-0.482991	-0.611664	-0.673609	-0.727764	-0.785454	-0.809842	-0.809886	-0.809886	-0.860346	-0.895506	-0.961089	-0.357853	-0.428817	-0.383096	-0.500482	-0.38849	-0.500482	-0.352271	-0.38903	-0.413612	no
chr1	23428705	23509218	ASAP3	-0.466791	-0.49963	-0.522959	-0.341325	-0.408571	-0.408571	-0.436827	-0.482991	-0.611664	-0.673609	-0.727764	-0.785454	-0.809842	-0.809886	-0.809886	-0.860346	-0.895506	-0.961089	-0.357853	-0.428817	-0.383096	-0.500482	-0.38849	-0.500482	-0.352271	-0.38903	-0.413612	no
chr1	23509718	23558155	E2F2	-0.466791	-0.49963	-0.522959	-0.341325	-0.408571	-0.408571	-0.436827	-0.482991	-0.611664	-0.673609	-0.727764	-0.785454	-0.809842	-0.809886	-0.809886	-0.860346	-0.895506	-0.961089	-0.357853	-0.428817	-0.383096	-0.500482	-0.38849	-0.500482	-0.352271	-0.38903	-0.413612	yes
chr1	23558655	23580923	ID3	-0.466791	-0.49963	-0.522959	-0.341325	-0.408571	-0.408571	-0.436827	-0.482991	-0.611664	-0.673609	-0.727764	-0.785454	-0.809842	-0.809886	-0.809886	-0.860346	-0.895506	-0.961089	-0.357853	-0.428817	-0.383096	-0.500482	-0.38849	-0.500482	-0.352271	-0.38903	-0.413612	no
chr1	23627127	23691102	MDS2	-0.466791	-0.49963	-0.522959	-0.341325	-0.408571	-0.408571	-0.436827	-0.482991	-0.611664	-0.673609	-0.727764	-0.785454	-0.809842	-0.809886	-0.809886	-0.860346	-0.895506	-0.961089	-0.357853	-0.428817	-0.383096	-0.500482	-0.38849	-0.500482	-0.352271	-0.38903	-0.413612	no
chr1	23691602	23742859	RPL11	-0.466791	-0.49963	-0.522959	-0.341325	-0.408571	-0.408571	-0.436827	-0.482991	-0.611664	-0.673609	-0.727764	-0.785454	-0.809842	-0.809886	-0.809886	-0.860346	-0.895506	-0.961089	-0.357853	-0.428817	-0.383096	-0.500482	-0.38849	-0.500482	-0.352271	-0.38903	-0.413612	no
chr1	23748873	23777932	ELOA	-0.466791	-0.49963	-0.522959	-0.341325	-0.408571	-0.408571	-0.436827	-0.482991	-0.611664	-0.673609	-0.727764	-0.785454	-0.809842	-0.809886	-0.809886	-0.860346	-0.895506	-0.961089	-0.357853	-0.428817	-0.383096	-0.500482	-0.38849	-0.500482	-0.352271	-0.38903	-0.413612	no
chr1	23778673	23792945	PITHD1	-0.466791	-0.49963	-0.522959	-0.341325	-0.408571	-0.408571	-0.436827	-0.482991	-0.611664	-0.673609	-0.727764	-0.785454	-0.809842	-0.809886	-0.809886	-0.860346	-0.895506	-0.961089	-0.357853	-0.428817	-0.383096	-0.500482	-0.38849	-0.500482	-0.352271	-0.38903	-0.413612	no
chr1	23792637	23796088	LYPLA2	-0.466791	-0.49963	-0.522959	-0.341325	-0.408571	-0.408571	-0.436827	-0.482991	-0.611664	-0.673609	-0.727764	-0.785454	-0.809842	-0.809886	-0.809886	-0.860346	-0.895506	-0.961089	-0.357853	-0.428817	-0.383096	-0.500482	-0.38849	-0.500482	-0.352271	-0.38903	-0.413612	no
chr1	23795782	23802574	GALE	-0.466791	-0.49963	-0.522959	-0.341325	-0.408571	-0.408571	-0.436827	-0.482991	-0.611664	-0.673609	-0.727764	-0.785454	-0.809842	-0.809886	-0.809886	-0.860346	-0.895506	-0.961089	-0.357853	-0.428817	-0.383096	-0.500482	-0.38849	-0.500482	-0.352271	-0.38903	-0.413612	no
chr1	23802367	23825725	HMGCL	-0.466791	-0.49963	-0.522959	-0.341325	-0.408571	-0.408571	-0.436827	-0.482991	-0.611664	-0.673609	-0.727764	-0.785454	-0.809842	-0.809886	-0.809886	-0.860346	-0.895506	-0.961089	-0.357853	-0.428817	-0.383096	-0.500482	-0.38849	-0.500482	-0.352271	-0.38903	-0.413612	no
chr1	23845542	23874586	FUCA1	-0.466791	-0.49963	-0.522959	-0.341325	-0.408571	-0.408571	-0.436827	-0.482991	-0.611664	-0.673609	-0.727764	-0.785454	-0.223062	-0.35377	-0.35377	-0.386659	-0.414352	-0.334413	-0.357853	-0.428817	-0.383096	-0.500482	-0.38849	-0.500482	-0.352271	-0.38903	-0.413612	no
chr1	23874336	23928465	CNR2	-0.466791	-0.49963	-0.522959	-0.341325	-0.408571	-0.408571	-0.436827	-0.482991	-0.611664	0	0	0	-0.156844	-0.147191	-0.156844	-0.179463	-0.209822	-0.265219	-0.357853	-0.428817	-0.383096	-0.500482	-0.38849	-0.500482	-0.352271	-0.38903	-0.413612	no
chr1	23928965	23929371	MIR378F	-0.466791	-0.49963	-0.522959	-0.341325	-0.408571	-0.408571	-0.436827	-0.482991	-0.611664	0	0	0	-0.156844	-0.147191	-0.156844	-0.179463	-0.209822	-0.265219	-0.357853	-0.428817	-0.383096	-0.500482	-0.38849	-0.500482	-0.352271	-0.38903	-0.413612	no
chr1	23960707	23967911	PNRC2	-0.466791	-0.49963	-0.522959	-0.341325	-0.408571	-0.408571	-0.436827	-0.482991	-0.611664	0	0	0	-0.156844	-0.147191	-0.156844	-0.179463	-0.209822	-0.265219	-0.357853	-0.428817	-0.383096	-0.500482	-0.38849	-0.500482	-0.352271	-0.38903	-0.413612	no
chr1	23967605	24056797	SRSF10	-0.466791	-0.49963	-0.522959	-0.341325	-0.408571	-0.408571	-0.436827	-0.482991	-0.611664	0	0	0	-0.156844	-0.147191	-0.156844	-0.179463	-0.209822	-0.265219	-0.357853	-0.428817	-0.383096	-0.500482	-0.38849	-0.500482	-0.352271	-0.38903	-0.413612	no
chr1	24057297	24120137	MYOM3	-0.466791	-0.49963	-0.522959	-0.341325	-0.408571	-0.408571	-0.436827	-0.482991	-0.611664	0	0	0	-0.156844	-0.147191	-0.156844	-0.179463	-0.209822	-0.265219	-0.357853	-0.428817	-0.383096	-0.500482	-0.38849	-0.500482	-0.352271	-0.38903	-0.413612	no
chr1	24120637	24156570	IL22RA1	-0.466791	-0.49963	-0.522959	-0.341325	-0.408571	-0.408571	-0.436827	-0.482991	-0.611664	0	0	0	-0.156844	-0.147191	-0.156844	-0.179463	-0.209822	-0.265219	-0.357853	-0.428817	-0.383096	-0.500482	-0.38849	-0.500482	-0.352271	-0.38903	-0.413612	no
chr1	24157070	24318803	IFNLR1	-0.466791	-0.49963	-0.522959	-0.341325	-0.408571	-0.408571	-0.436827	-0.482991	-0.611664	0	0	0	-0.156844	-0.147191	-0.156844	-0.179463	-0.209822	-0.265219	-0.357853	-0.428817	-0.383096	-0.500482	-0.38849	-0.500482	-0.352271	-0.38903	-0.413612	no
chr1	24319303	24369337	GRHL3	-0.466791	-0.49963	-0.522959	-0.341325	-0.408571	-0.408571	-0.436827	-0.482991	-0.611664	0	0	0	-0.156844	-0.147191	-0.156844	-0.179463	-0.209822	-0.265219	-0.357853	-0.428817	-0.383096	-0.500482	-0.38849	-0.500482	-0.352271	-0.38903	-0.413612	no
chr1	24369041	24418950	STPG1	-0.466791	-0.49963	-0.522959	-0.341325	-0.408571	-0.408571	-0.436827	-0.482991	-0.611664	0	0	0	-0.156844	-0.147191	-0.156844	-0.179463	-0.209822	-0.265219	-0.357853	-0.428817	-0.383096	-0.500482	-0.38849	-0.500482	-0.352271	-0.38903	-0.413612	no
[truncated: 19,892 more rows]

## Sheet: Table S4
Table S4: Single-cell RNA sequencing QC metrics
		filters used				number of cells after each filter steps					clusters
[truncated: 28 more rows]

## Sheet: Table S5
Table S5: Meta-clusters marker genes
BT474_h0.58										MCF7_h0.59										T47D_h0.53
[truncated: 1,951 more rows]

## Sheet: Table S6
Table S6: CIRCLE Signature (161 genes)
[truncated: 162 more rows]

## Sheet: Table S7
Table S7: Bulk ATAC sequencing QC metrics
[truncated: 41 more rows]

[truncated: 2 more sheets: Table S8, Table S9]
